# Supplementary material for: The Role of Vitamin D in the Transcriptional Program of Human Pregnancy
Source: PubMed Central journal article supplement (PMC5053446; doi:10.1371/journal.pone.0163832), 2016-10-06
Supplement: pone.0163832.s001.pdf [file pone.0163832.s001.pdf]

Al-Garawi A. et al:

# The role of Vitamin D in the transcriptional program of human pregnancy

## Supporting Information (S1 Table)

### S1 Table

Maternal differentially expressed genes between 1st and 3rd trimester of pregnancy  
(FDR < 0.05)

| Probe_ID           | GENE SYMBOL | ENTREZID | P-value  | FDR adjusted |
|--------------------|-------------|----------|----------|--------------|
| uFIO1F07cIGqFJNTSU | PLCD1       | 5333     | <0.0001  | <0.0001      |
| itZXnm3vbSeL1_4N3s | CUL4A       | 8451     | <0.0001  | <0.0001      |
| rISlie13T6uB4_KCrc | VAMP2       | 6844     | <0.0001  | <0.0001      |
| 6X_RJNfoqj2Qukle_M | PARP9       | 83666    | <0.0001  | <0.0001      |
| Nrlw71O3gv5VLnEb6l | MAOA        | 4128     | <0.0001  | <0.0001      |
| xVS4peoX.wjZ7u3sBU | SPIB        | 6689     | <0.0001  | <0.0001      |
| KWlca7nvlK9635HCK0 | PRDX3       | 10935    | <0.0001  | <0.0001      |
| 6uXPf6fDiHqFPriCk  | CD36        | 948      | <0.0001  | <0.0001      |
| 08X9Hd6eereW2teecE | ADORA2A     | 135      | <0.0001  | <0.0001      |
| uZ39y5CAeSno0svQSc | JAZF1       | 221895   | <0.0001  | <0.0001      |
| xpUB_6tEBXviMCenvM | SFRP2       | 6423     | <0.0001  | <0.0001      |
| ThQC4HM30IR7f.qIK0 | CHPT1       | 56994    | <0.0001  | <0.0001      |
| EWeVNwX2wiXt179SWU | GNG7        | 2788     | 5.54E-08 | 7.80E-05     |
| ioRaPdcY0JQtSefUCI | PRDX3       | 10935    | 5.54E-08 | 7.80E-05     |
| okB2FVvXISMOnQwd4o | INPP5B      | 3633     | 5.54E-08 | 7.80E-05     |
| BX1INWjAlBuSihTnJ4 | CPA3        | 1359     | 5.54E-08 | 7.80E-05     |
| TFXnpoyQh3ui.vS6xo | TFDP1       | 7027     | 5.54E-08 | 7.80E-05     |
| cXkJSHGV_SOnfDpAXk | NUP98       | 4928     | 1.11E-07 | 9.48E-05     |
| 3qSjV6EfGxDn255eOE | SYTL1       | 84958    | 1.11E-07 | 9.48E-05     |
| 6W1ZWbaJpZaVah4WI0 | NUDT4P1     | 440672   | 1.11E-07 | 9.48E-05     |
| oQu0jgqK6LzXfMsS6U | STRAP       | 11171    | 1.11E-07 | 9.48E-05     |
| 9kNJPXVe6OEyItOVAQ | PITPNC1     | 26207    | 1.11E-07 | 9.48E-05     |
| ikRLn9bpHkxDeKXXd0 | STAT1       | 6772     | 1.11E-07 | 9.48E-05     |
| 9d4ktJp1L_pWMKC91s | RAB37       | 326624   | 1.11E-07 | 9.48E-05     |
| EIOXNQ4bdTAKVKBGok | TBC1D20     | 128637   | 1.11E-07 | 9.48E-05     |
| WVej5VLXuFO_V4IIU0 | UBE2F       | 140739   | 1.11E-07 | 9.48E-05     |
| 9Xu4nvCuUD6e0.s9OE | KLF3        | 51274    | 1.11E-07 | 9.48E-05     |
| QSR_4Kpg5K9Suiolbo | ABCG1       | 9619     | 1.11E-07 | 9.48E-05     |
| 0F1BV51REuEhaAuCLQ | KLF10       | 7071     | 1.66E-07 | 0.000137226  |
| Kt3.4BOav4DOEX7q.U | CUL4A       | 8451     | 2.22E-07 | 0.000161771  |
| KhyFD7Tn4RB57p_uc  | CA2         | 760      | 2.22E-07 | 0.000161771  |
| TtEvij.p7jqdMdmOI4 | EFCAB14     | 9813     | 2.22E-07 | 0.000161771  |

|                    |           |        |          |             |
|--------------------|-----------|--------|----------|-------------|
| WNQVcgWb6v7q7dudJQ | ABCG1     | 9619   | 2.77E-07 | 0.000161771 |
| ljhMe8iFH08khXrkuE | CBWD5     | 220869 | 2.77E-07 | 0.000161771 |
| i0igN1S1R3aKvCIKXU | RANBP3    | 8498   | 2.77E-07 | 0.000161771 |
| TSaSaYSX1eIofAJIKA | C19orf43  | 79002  | 2.77E-07 | 0.000161771 |
| K65pzoh7egp_g6.Pnw | TFDP1     | 7027   | 2.77E-07 | 0.000161771 |
| Zdl9eheu16_rUK4.xl | HIATL1    | 84641  | 2.77E-07 | 0.000161771 |
| uhScUXyfTVcfkUFLVo | RNF216P1  | 441191 | 2.77E-07 | 0.000161771 |
| BSEI6J50f_Wr_ulH0U | ZNF324    | 25799  | 2.77E-07 | 0.000161771 |
| u0YEMn5ncd7Lzuj5Yk | MFSD1     | 64747  | 2.77E-07 | 0.000161771 |
| r6P_SKuIH3e5edIplc | GMEB2     | 26205  | 3.32E-07 | 0.000180889 |
| KRe.HyrNxUhU2PeL2o | FAHD1     | 81889  | 3.32E-07 | 0.000180889 |
| IUECOC9XNxoCk4eopU | LAP3      | 51056  | 3.32E-07 | 0.000180889 |
| TuyPIWIXd4leyTe4yc | PRKRIP1   | 79706  | 3.88E-07 | 0.000189503 |
| cDvgrjBntVOSRBBZUE | CA1       | 759    | 3.88E-07 | 0.000189503 |
| Zer5ueuGDUT03Q6CjU | GADD45A   | 1647   | 3.88E-07 | 0.000189503 |
| cDXmkgli9BNdelFh1w | NAMPT     | 10135  | 4.43E-07 | 0.000189503 |
| W5J4J047qZ0KG3n1F0 | TUBGCP6   | 85378  | 4.43E-07 | 0.000189503 |
| iMeiqS6uUsu15619eA | LACTB     | 114294 | 4.43E-07 | 0.000189503 |
| 91V_OSAUqHfSj_I6X4 | COQ2      | 27235  | 4.43E-07 | 0.000189503 |
| KhNKQKSdPRG9SITH0k | DMXL2     | 23312  | 4.43E-07 | 0.000189503 |
| 6V_yuETneV3iktJgpA | ISCA1     | 81689  | 4.43E-07 | 0.000189503 |
| NeUv3for6T7AooEnwo | EIF1B     | 10289  | 4.43E-07 | 0.000189503 |
| N51DOd.4fDtCf6vjuo | NA        | NA     | 4.43E-07 | 0.000189503 |
| Kne_r7vqIjp6L093RU | CBY1      | 25776  | 4.43E-07 | 0.000189503 |
| xkSEcSFEk9JVTov67k | TNFRSF13C | 115650 | 4.98E-07 | 0.000197988 |
| NtYFKp7Dpf3zHcgzEA | ISCA1P1   | 389293 | 4.98E-07 | 0.000197988 |
| 0FSDzn.oO610exKIO4 | ISCA1     | 81689  | 5.54E-07 | 0.000197988 |
| Zt95.Ru3qOq0gOTXUk | C9orf78   | 51759  | 5.54E-07 | 0.000197988 |
| xV7fpBdx5U3VedB91E | SDK2      | 54549  | 5.54E-07 | 0.000197988 |
| 0ZqCOmgSnFC1ue.u7c | ACP1      | 52     | 5.54E-07 | 0.000197988 |
| inrWLkuu.EHD40QUvE | RNY3      | 6085   | 5.54E-07 | 0.000197988 |
| rSd7BdW_bQtwFCPO4c | FHL2      | 2274   | 5.54E-07 | 0.000197988 |
| N_qS0pP7N.rKkELAE4 | C4orf32   | 132720 | 5.54E-07 | 0.000197988 |
| ioMeCC6goFCeESI0eQ | SOCS2     | 8835   | 5.54E-07 | 0.000197988 |
| Hi9BxO96qVojl4f5I4 | GADD45A   | 1647   | 5.54E-07 | 0.000197988 |
| r26tXoRpfglBff6KJA | KIAA0195  | 9772   | 6.09E-07 | 0.000202663 |
| rOTSdl6h6d7jACFXVk | KLHL22    | 84861  | 6.09E-07 | 0.000202663 |
| WLF_H_9Ek7KuOJHRD4 | CA2       | 760    | 6.09E-07 | 0.000202663 |
| Zov9pcVQhDiM9eV.XU | FAM129C   | 199786 | 6.09E-07 | 0.000202663 |
| ivdSKCuggFOPkLKD4s | GBP1      | 2633   | 6.09E-07 | 0.000202663 |
| 9sVETSRxRCBQR4I2gk | SNRNP200  | 23020  | 6.65E-07 | 0.000202879 |
| Ns6J75q.nX.35.m50s | YPEL2     | 388403 | 6.65E-07 | 0.000202879 |
| ZX.0TJ36eyj5VHUAFI | NA        | NA     | 6.65E-07 | 0.000202879 |

|                    |          |        |          |             |
|--------------------|----------|--------|----------|-------------|
| up7nZVehL4n_jzfXfQ | FAM198B  | 51313  | 6.65E-07 | 0.000202879 |
| uKXTe53Z6kbp9O0sJA | ZC3H12A  | 80149  | 6.65E-07 | 0.000202879 |
| xKp7VUXB1J1V9G_0UI | TMEM222  | 84065  | 7.20E-07 | 0.000202879 |
| Tv60nAHSeSXoSyJiFU | PAFAH2   | 5051   | 7.20E-07 | 0.000202879 |
| 3jtH4VT87sokcRT6.U | SNX3     | 8724   | 7.20E-07 | 0.000202879 |
| TU4d1Lv.3voURW0S9E | CDC42EP3 | 10602  | 7.20E-07 | 0.000202879 |
| Qkl1OrSbvUloBbBfkc | FCGR1B   | 2210   | 7.20E-07 | 0.000202879 |
| cJSqpSF_9O7q3t9fOU | ZNF641   | 121274 | 7.20E-07 | 0.000202879 |
| NS3rS4gKliriSkn3us | HDC      | 3067   | 7.20E-07 | 0.000202879 |
| QUUtJIognyKB_XuJno | INSIG1   | 3638   | 7.20E-07 | 0.000202879 |
| xm60reewT9UUHd_e1E | CBLB     | 868    | 7.75E-07 | 0.000211678 |
| NJJN8iVSfe6OF3jiVo | NA       | NA     | 7.75E-07 | 0.000211678 |
| QBSu3uP3Dw0WelPESs | RAB5A    | 5868   | 8.31E-07 | 0.000211678 |
| WpeSSi65ISC3XQ_3Q  | RASSF1   | 11186  | 8.31E-07 | 0.000211678 |
| Ty1h9FTrve5_S5i754 | RBMS1    | 5937   | 8.31E-07 | 0.000211678 |
| EOjy4dF5L6iUnEFQNM | CC2D1B   | 200014 | 8.31E-07 | 0.000211678 |
| TSxSF6ii9JZniCfxc  | NA       | NA     | 8.31E-07 | 0.000211678 |
| f8B5oO6XefXW115UKE | BAZ1B    | 9031   | 8.31E-07 | 0.000211678 |
| f.DpMKH5PPk8qJq054 | VAMP4    | 8674   | 8.31E-07 | 0.000211678 |
| cpREICCJU5B0tSj.Ho | GPR68    | 8111   | 8.86E-07 | 0.000218807 |
| 6d4iRlopAJ97qO5y2k | ARMCX3   | 51566  | 8.86E-07 | 0.000218807 |
| WRTTVLJ5XPQeQS3UoU | CD36     | 948    | 8.86E-07 | 0.000218807 |
| EirpVXgvs0t46Be_os |          | 55016  | 9.41E-07 | 0.000225508 |
| 3wUi8UqSSacQfWIRI4 | PHF1     | 5252   | 9.41E-07 | 0.000225508 |
| x_SKKA50idYrnutiA  | FKRP     | 79147  | 9.41E-07 | 0.000225508 |
| BaASFxn9g.E7047lfs | BEX1     | 55859  | 9.97E-07 | 0.000234091 |
| xue1DIBEEIEDkprI5A |          | 55016  | 9.97E-07 | 0.000234091 |
| l7rgikgWK2oIT47eJc | LAMTOR4  | 389541 | 1.05E-06 | 0.000241185 |
| cbrT3_e7OOpOevdK_U | PPM1A    | 5494   | 1.05E-06 | 0.000241185 |
| WjkgB1D0oIfmLM3gkc | FECH     | 2235   | 1.11E-06 | 0.000241185 |
| Nk_t6ULcQ7VDNChBRU | GBP1     | 2633   | 1.11E-06 | 0.000241185 |
| Orv53XCJfTkrV4FGKA | PGRMC1   | 10857  | 1.11E-06 | 0.000241185 |
| ll.uN0XvoORw7.eJV8 | CASP4    | 837    | 1.11E-06 | 0.000241185 |
| NI9RHRdwBLX0B9S5BE | CCR3     | 1232   | 1.11E-06 | 0.000241185 |
| 05.K._ASVaYZdz6d2k | H1FX     | 8971   | 1.11E-06 | 0.000241185 |
| KdTeVbQMABRCvYllqU | P4HTM    | 54681  | 1.16E-06 | 0.000244359 |
| BVN3IH_Oc.q846pCOK | GCH1     | 2643   | 1.16E-06 | 0.000244359 |
| f1eMxFNVD5190XXdKU | TRIM51   | 84767  | 1.16E-06 | 0.000244359 |
| WJ1yeuMalqf6KH6hJI | ESYT1    | 23344  | 1.16E-06 | 0.000244359 |
| 6VH6yAiVIJJXpXsI6E | ITPKB    | 3707   | 1.22E-06 | 0.000247317 |
| oXoOf16NSfVgjWFIVI | CD300LB  | 124599 | 1.22E-06 | 0.000247317 |
| 0gLsZQcKhUQJKSkw5I | LGALS8   | 3964   | 1.22E-06 | 0.000247317 |
| K326gpVLFHbKK3Sd6Q | BRF1     | 2972   | 1.22E-06 | 0.000247317 |

|                    |          |        |          |             |
|--------------------|----------|--------|----------|-------------|
| WL_70MFQE0CofunuiA | NA       | NA     | 1.27E-06 | 0.000250681 |
| TSilf_Qp8q7pSV4Ccc | ABHD14B  | 84836  | 1.27E-06 | 0.000250681 |
| BpQH6JK7U1SV7svlko | HLA-DOA  | 3111   | 1.27E-06 | 0.000250681 |
| IKE1EqyK_ru7Gou3ik | TMEM62   | 80021  | 1.33E-06 | 0.000250681 |
| EpglSiFFii.DYiO96l | CCNDBP1  | 23582  | 1.33E-06 | 0.000250681 |
| 06FxShieqJ9dE3eeA  | CPSF3L   | 54973  | 1.33E-06 | 0.000250681 |
| 6orCPIG5eese45P0Lo | PROS1    | 5627   | 1.33E-06 | 0.000250681 |
| 3Ql.SJSLqzI7IJSiOk | ELP6     | 54859  | 1.33E-06 | 0.000250681 |
| odZSnk9CdzI3fokDjg | ARMC8    | 25852  | 1.33E-06 | 0.000250681 |
| Ed6OOUeOXqgwK6Ju6A | STOM     | 2040   | 1.38E-06 | 0.000257077 |
| 0pf.QRwb4sWsn7jQKQ | ABCA13   | 154664 | 1.38E-06 | 0.000257077 |
| rde4qmtUuRI7.0L10s | TTC38    | 55020  | 1.44E-06 | 0.000265304 |
| 6B6hRUz9LKF6sqPoLE | ST13P7   | 155019 | 1.50E-06 | 0.000267284 |
| oeJSjuQyCSq_1XeUjc | CHMP7    | 91782  | 1.50E-06 | 0.000267284 |
| NsrMpPcV.gMnu1QXvk | SOCS2    | 8835   | 1.50E-06 | 0.000267284 |
| NX9EfunjuDnhYBOiNU | IFI16    | 3428   | 1.50E-06 | 0.000267284 |
| Zt6SoeDheO0j8j316o | GLS      | 2744   | 1.61E-06 | 0.000279742 |
| EUn0IKhANV1QFHdRJ8 | CREG1    | 8804   | 1.66E-06 | 0.000279742 |
| 3jRcJE6OlbiRLzplgs | PIP5K1B  | 8395   | 1.72E-06 | 0.000279742 |
| ZQrSiiQA4IJFJI_n_4 | NA       | NA     | 1.72E-06 | 0.000279742 |
| BKuv5XwggJ76hAhFiU | LGALSL   | 29094  | 1.72E-06 | 0.000279742 |
| r5d5UnVT0REWkf0xXg | PHF1     | 5252   | 1.72E-06 | 0.000279742 |
| Zk1cec0LFCOEPV6VNQ | RSRC1    | 51319  | 1.72E-06 | 0.000279742 |
| uqF1y9Ruc09xwekVwo | FUT4     | 2526   | 1.72E-06 | 0.000279742 |
| H4HUml00Un0IPNJ06U | ZNF565   | 147929 | 1.72E-06 | 0.000279742 |
| 3UD6lLd6XoCKVJeJ5l | DUS1L    | 64118  | 1.72E-06 | 0.000279742 |
| 6QOJ6JdU5UXoolgiKM | FAM98C   | 147965 | 1.72E-06 | 0.000279742 |
| uVKj.DkQFM_4QiOJd4 | ARHGAP18 | 93663  | 1.72E-06 | 0.000279742 |
| 9eMh.XcAlPR1l.xeqA | GCLC     | 2729   | 1.72E-06 | 0.000279742 |
| WOUq4KhLpSofa5l8lk | AP5Z1    | 9907   | 1.77E-06 | 0.00028489  |
| fgvcFUrFTg7ifFKt.k | MMP8     | 4317   | 1.77E-06 | 0.00028489  |
| KUK7wqjLF1Q9CSIB4U | HHEX     | 3087   | 1.88E-06 | 0.000290978 |
| QqwgOJctFCB1FVloLo | NA       | NA     | 1.88E-06 | 0.000290978 |
| 6RxRPUt.wtZ6qWBJLk | FAM105A  | 54491  | 1.88E-06 | 0.000290978 |
| 3e90qFN2nl17FSHcF4 | TSEN54   | 283989 | 1.88E-06 | 0.000290978 |
| BU5dle0VXFL1QtTuxU | PTPRCAP  | 5790   | 1.88E-06 | 0.000290978 |
| Zeqv30z1576CS_FIDk | RPIA     | 22934  | 1.88E-06 | 0.000290978 |
| 9qDd_iB4p4qyKizlQs | WIBG     | 84305  | 1.94E-06 | 0.000292001 |
| uF4nfeIG6BdgVideSA | CD320    | 51293  | 1.94E-06 | 0.000292001 |
| fUkoijrKvlKnSC5CeM | C6orf106 | 64771  | 1.94E-06 | 0.000292001 |
| 9gl7MATrEuLg5VTVQg | MEIS3P1  | 4213   | 1.94E-06 | 0.000292001 |
| llonl.6KVX0XknOOV8 | SIGMAR1  | 10280  | 2.05E-06 | 0.00029567  |
| Bc6lklhFV3xjbo79eg | P2RY8    | 286530 | 2.05E-06 | 0.00029567  |

|                    |           |           |          |             |
|--------------------|-----------|-----------|----------|-------------|
| KtXVEtx3t1FUK3r3g0 | ASB16-AS1 | 339201    | 2.05E-06 | 0.00029567  |
| Hjgi5_ClupcLpnXnjK | CMAS      | 55907     | 2.05E-06 | 0.00029567  |
| ZgEpErjk9157590ud0 | GHITM     | 27069     | 2.05E-06 | 0.00029567  |
| Ql8tIpX.d7XgVUrOrg | SASH1     | 23328     | 2.05E-06 | 0.00029567  |
| Qd3Xe10071J3cSpRMc | TTC5      | 91875     | 2.05E-06 | 0.00029567  |
| rnrrh5EYTo1T4nh7.U | NA        | NA        | 2.10E-06 | 0.000297323 |
| T03kDulKfqgQ465Eck | IFIH1     | 64135     | 2.10E-06 | 0.000297323 |
| KeK0qLnp0SxJO5fDn0 | RASSF1    | 11186     | 2.10E-06 | 0.000297323 |
| 0AmKRHnx5fqvuiOhW4 | NELFB     | 25920     | 2.16E-06 | 0.000297323 |
| BXkl.7o_EstV1sonRI | ACP1      | 52        | 2.16E-06 | 0.000297323 |
| i3_M2x4rB9RslX5Rmk | PPP1R16B  | 26051     | 2.16E-06 | 0.000297323 |
| WoB4ptCOnuknJAJAjK | PCTP      | 58488     | 2.16E-06 | 0.000297323 |
| EhXk_QBEr2r1cLVEuw | PRDM10    | 56980     | 2.16E-06 | 0.000297323 |
| Nd8wBK_mNP1Qj6.V_I | SH3BGRL   | 6451      | 2.33E-06 | 0.000316556 |
| TglETZG.x1GGRqnee0 | PAOX      | 196743    | 2.33E-06 | 0.000316556 |
| KV7kDSLO4uggquLXB4 | FCRL3     | 115352    | 2.44E-06 | 0.000326421 |
| fJ5fUp.M954glAnol4 | TSTD1     | 100131187 | 2.49E-06 | 0.000326421 |
| lkbhEJ4XQidRv_n2JA | RHOT1     | 55288     | 2.49E-06 | 0.000326421 |
| r4urdOoESuR.VEftVU | WDR73     | 84942     | 2.55E-06 | 0.000326421 |
| Qe0WCUoJVv7Cbu_658 | H2AFY     | 9555      | 2.60E-06 | 0.000326421 |
| BjqoqzzHl0t4ddBUkk | SIGMAR1   | 10280     | 2.60E-06 | 0.000326421 |
| KLqCO6xICV1CVpKTVc | MEA1      | 4201      | 2.60E-06 | 0.000326421 |
| EWdl7.qgL6Ijbpfmlo | TNFRSF8   | 943       | 2.60E-06 | 0.000326421 |
| oZ1CICSgKgn0Xvi.kM | ING2      | 3622      | 2.60E-06 | 0.000326421 |
| rUuvLp9ApUnhFdRJcl | DRG2      | 1819      | 2.60E-06 | 0.000326421 |
| ThXJHp7hOefrnI3rXg | GTF3C5    | 9328      | 2.60E-06 | 0.000326421 |
| fWKhqtv.d5vS6P1t.4 | DNAJB6    | 10049     | 2.60E-06 | 0.000326421 |
| 0D3CJfoVi7unKvleno | RAD9A     | 5883      | 2.60E-06 | 0.000326421 |
| ZkEjUBB9gpA7rpujKA | VAMP4     | 8674      | 2.60E-06 | 0.000326421 |
| NkTeUf_D1aeiJ6ShXs | SPNS3     | 201305    | 2.60E-06 | 0.000326421 |
| xnqhEk0nQhtFdT3kdl | COL17A1   | 1308      | 2.66E-06 | 0.00033163  |
| NVlpToniPiHJfuv0Rw | STEAP4    | 79689     | 2.77E-06 | 0.000343658 |
| BgSEayCHZU.6DuFt7U | DDX39B    | 7919      | 2.88E-06 | 0.000353738 |
| BjpCEsgkinlRqHsFbQ | IDH1      | 3417      | 2.88E-06 | 0.000353738 |
| c0fqKhkyCidygRLlIk | STOM      | 2040      | 2.99E-06 | 0.000361181 |
| uiik_0fVFKOSh_q_K4 | EGLN2     | 112398    | 2.99E-06 | 0.000361181 |
| xeoCOsvt.J9r0Hi.Y  | MBNL3     | 55796     | 3.05E-06 | 0.000361181 |
| QVJ0d0339SofNVQp7U | TAB1      | 10454     | 3.05E-06 | 0.000361181 |
| 6p1QpTggjsQpuXQsVY | STARD10   | 10809     | 3.05E-06 | 0.000361181 |
| x1X2eA_fP.rvoyKMql | DPYD      | 1806      | 3.05E-06 | 0.000361181 |
| 9V0C7RDnXXjh11UgBQ | OLR1      | 4973      | 3.05E-06 | 0.000361181 |
| 9XtThfqRKgveu0yM1Y | IDH1      | 3417      | 3.21E-06 | 0.000377147 |
| Hlf_t7qU.BeJlFP86o | ANKRD22   | 118932    | 3.21E-06 | 0.000377147 |

|                    |           |        |          |             |
|--------------------|-----------|--------|----------|-------------|
| cmREUEUpNxOpIUHTLo | TRA2A     | 29896  | 3.27E-06 | 0.000379925 |
| r4pJknS6K3iDhjFbh0 | EPHB6     | 2051   | 3.27E-06 | 0.000379925 |
| r7J67r56D73z6X5PHk | ITGB1     | 3688   | 3.32E-06 | 0.000380819 |
| HdbE7q7ZTu5XtHN7p4 | C19orf59  | 199675 | 3.32E-06 | 0.000380819 |
| r4BkWB9RneetLpp7Vc | DPP9      | 91039  | 3.32E-06 | 0.000380819 |
| iqfBe4fwwnoEtR4OrM | NPTN      | 27020  | 3.43E-06 | 0.000391639 |
| ubtBVA.8bOI1.LUVD0 | CEACAM8   | 1088   | 3.49E-06 | 0.000396069 |
| oSQt.uS_iOeW_6SJs  | CEP164    | 22897  | 3.82E-06 | 0.000431744 |
| c70LXLcyj6S.A5.HVU | OLFM4     | 10562  | 3.99E-06 | 0.000438171 |
| 9KO_S6XCiSX.ogqvU8 | UBA3      | 9039   | 3.99E-06 | 0.000438171 |
| EOuluuU1iD_SJE.lxw | CMAS      | 55907  | 3.99E-06 | 0.000438171 |
| ukUFLVq8jVA5yCUqOU | XKR8      | 55113  | 3.99E-06 | 0.000438171 |
| u.Sdd76EzC5N376Eyk | HNRNPK    | 3190   | 3.99E-06 | 0.000438171 |
| x3fBdKpFatEUJHtJ3s | FBXL6     | 26233  | 4.04E-06 | 0.000438171 |
| o0kToKVes6EeAoKnrU | AEBP1     | 165    | 4.04E-06 | 0.000438171 |
| KIRdKSESJE0eq930Rw | MS4A2     | 2206   | 4.04E-06 | 0.000438171 |
| 3WVCS7lckigDkE3ZCY | DERA      | 51071  | 4.04E-06 | 0.000438171 |
| 6DjoKCHq_Soe63deqU | FGFRL1    | 53834  | 4.15E-06 | 0.000448148 |
| 6seQeUgfrPsnnlZ4ck | CSNK1A1   | 1452   | 4.21E-06 | 0.000452087 |
| oXed_glbkhVEMCDCTo | ANKRD22   | 118932 | 4.32E-06 | 0.000453809 |
| KW6xMerSkck6KKtEi4 | TBC1D10C  | 374403 | 4.32E-06 | 0.000453809 |
| l6khTT4j41JVoVIJ4I | GMEB1     | 10691  | 4.32E-06 | 0.000453809 |
| WVKvx16fqPpKCR6Kd8 | UBQLN1    | 29979  | 4.32E-06 | 0.000453809 |
| foSe..BXfeQv74XE6k | ATP6AP2   | 10159  | 4.32E-06 | 0.000453809 |
| xl7v9lnKxloO.nF.Jo | FAM198B   | 51313  | 4.49E-06 | 0.000469205 |
| TnoszXhUhcYT4I.klo | SMPDL3A   | 10924  | 4.54E-06 | 0.000470885 |
| 3gqTquScgS7K9XQwVc | PCBP1     | 5093   | 4.54E-06 | 0.000470885 |
| QUXILvPznV9urjpRlc | CRIP2     | 1397   | 4.60E-06 | 0.000472151 |
| 3.orDPq_D3h5V.cnoU | RPE       | 6120   | 4.65E-06 | 0.000472151 |
| cmVBdX09CRP8alxKgo | LINC00294 | 283267 | 4.65E-06 | 0.000472151 |
| 0B7ko6J3jAmRCudASk | SDCBP     | 6386   | 4.65E-06 | 0.000472151 |
| QrAE564FKrvjrjCooM | CD55      | 1604   | 4.65E-06 | 0.000472151 |
| Wu17hRSKTIkhBEd.2c | FAM219B   | 57184  | 4.82E-06 | 0.00048695  |
| BhFLTHp0qVFnDI8OA0 | TRIM22    | 10346  | 4.87E-06 | 0.000490477 |
| T5vrUiaKe7l6qL.Xcw | ENO2      | 2026   | 4.93E-06 | 0.000491917 |
| ZSoLr4Vda6elHeci1M | WASH7P    | 653635 | 4.93E-06 | 0.000491917 |
| Qd31eNfoolYHj3one4 | HLA-DOB   | 3112   | 5.04E-06 | 0.000498815 |
| TUv5K5EBzirfs1GwRI | RIN2      | 54453  | 5.04E-06 | 0.000498815 |
| WBWX3hIkKKE46qbvX4 | MLL       | 4297   | 5.09E-06 | 0.000500163 |
| orn7qnqLkhPrv3njtU | MZB1      | 51237  | 5.09E-06 | 0.000500163 |
| lByjB f7xUlw_CLpl  | SNX10     | 29887  | 5.26E-06 | 0.000508142 |
| ZSUd4kjeB87S0dUMSo | C12orf5   | 57103  | 5.26E-06 | 0.000508142 |
| uu3qV6J6jhPi.ieeF4 | MAGED1    | 9500   | 5.26E-06 | 0.000508142 |

|                    |           |        |          |             |
|--------------------|-----------|--------|----------|-------------|
| T4IJe91qXg7eq5_5f8 | RPP25L    | 138716 | 5.26E-06 | 0.000508142 |
| KilNSpCge3969DleVY | NAT6      | 24142  | 5.37E-06 | 0.000512169 |
| 6RLoiatEoTjkq1K.e8 | CARNS1    | 57571  | 5.37E-06 | 0.000512169 |
| oJVkUv00l_e7rv0Lk  | TMOD1     | 7111   | 5.37E-06 | 0.000512169 |
| N6SiXSh7oYKO6X6k.s | OBSCN     | 84033  | 5.43E-06 | 0.000512169 |
| WFwa905rmw_yOTsfu4 | NPTN      | 27020  | 5.48E-06 | 0.000512169 |
| cCUgLove1nmJeiOqBl | PASK      | 23178  | 5.54E-06 | 0.000512169 |
| ISOlCHrqFSHh_9E7pA | TCEA1     | 6917   | 5.54E-06 | 0.000512169 |
| r3uZeZdoiQuCiTTq.4 | UNKL      | 64718  | 5.54E-06 | 0.000512169 |
| IN97qVfVIRaNTqRwVk | FAM73B    | 84895  | 5.54E-06 | 0.000512169 |
| 0CT14T0JkYurlnunHk | GCLM      | 2730   | 5.54E-06 | 0.000512169 |
| ldd_mShlWgVAUE.Unc | LRRC56    | 115399 | 5.54E-06 | 0.000512169 |
| 06TJxbi90koH1SY4w4 | ALDH5A1   | 7915   | 5.59E-06 | 0.000515301 |
| ZpeHVAjrJD9Up_Z7nQ | NR2C2     | 7182   | 5.65E-06 | 0.000518409 |
| 3ERdCVTludNcVUNXUM | DCXR      | 51181  | 5.76E-06 | 0.00051886  |
| oLN7F5VR0k.a59X9Hg | SNCA      | 6622   | 5.76E-06 | 0.00051886  |
| 3kgRZv09z60PU7p4co | DYRK1A    | 1859   | 5.76E-06 | 0.00051886  |
| 3tC_VJ_i_3tGRO7Xus | PITHD1    | 57095  | 5.76E-06 | 0.00051886  |
| ctNSQ4iDXl3shQTUu4 | MYOF      | 26509  | 5.81E-06 | 0.00051886  |
| KSoDukRldik.wR5n0o | RER1      | 11079  | 5.87E-06 | 0.00051886  |
| lVyKI9IJEFEkIkXp40 | CYB5A     | 1528   | 5.87E-06 | 0.00051886  |
| l7egEp8n8ueq6heV7o | RAB11FIP4 | 84440  | 5.87E-06 | 0.00051886  |
| BkH9RXIT.7AHktN_hc | MARCKS    | 4082   | 5.87E-06 | 0.00051886  |
| Eq_2.6AspQSANceREk | MAP4K5    | 11183  | 5.87E-06 | 0.00051886  |
| xeSjevQDS0dX0gkhOk | GYG1      | 2992   | 5.93E-06 | 0.000519667 |
| 0f9QvVClxJ4JXysXu8 | CPT1B     | 1375   | 5.98E-06 | 0.000519667 |
| Ko8_Ai3qFfvqi6ukro | STARD3    | 10948  | 6.04E-06 | 0.000519667 |
| Zzl1f_74R7J0x6ALY0 | DHX15     | 1665   | 6.04E-06 | 0.000519667 |
| fu7.Lty3kiJ7uPDABo | ALDH5A1   | 7915   | 6.15E-06 | 0.000519667 |
| fd.iFatt71Gaa_aYe8 | LRRC45    | 201255 | 6.15E-06 | 0.000519667 |
| BhV3kDu0t1AiLN1VQM | GLRX5     | 51218  | 6.20E-06 | 0.000519667 |
| HCiVRKCg96CM5e6NeE | SNCA      | 6622   | 6.20E-06 | 0.000519667 |
| NauQlbu3pd.Xbghju0 | C7orf26   | 79034  | 6.20E-06 | 0.000519667 |
| indenl.07J0nOkVU4E | GPR19     | 2842   | 6.20E-06 | 0.000519667 |
| 6yu66bzpJWnnn6OYn4 | PKD1      | 5310   | 6.20E-06 | 0.000519667 |
| E_Ru6wkyn4lRyqkrE4 | KIAA1598  | 57698  | 6.20E-06 | 0.000519667 |
| Bo1HMkpFLt_0XodRMO | CHPT1     | 56994  | 6.20E-06 | 0.000519667 |
| TXe3Xn10eBI54O5Z4c | TTC38     | 55020  | 6.20E-06 | 0.000519667 |
| lJvQWZbiWniSgmltl  | RGS10     | 6001   | 6.26E-06 | 0.000519667 |
| 6h9R5TXVCqVA9.S6cU | CXCL10    | 3627   | 6.31E-06 | 0.000519667 |
| oJgigRgJA6SyV4hpY  | GOLGA8A   | 23015  | 6.31E-06 | 0.000519667 |
| Es9J3tCDrUr33I43kU | NA        | NA     | 6.31E-06 | 0.000519667 |
| 9JYohVmS55QZVrogng | CDC42     | 998    | 6.31E-06 | 0.000519667 |

|                    |          |        |          |             |
|--------------------|----------|--------|----------|-------------|
| KqS0wne.VXdVAI9JgY | SUMF1    | 285362 | 6.31E-06 | 0.000519667 |
| Wulu30aShBiglclbV8 | CXCR5    | 643    | 6.37E-06 | 0.000520647 |
| iVdQ6eujigrA7edwgk | SELK     | 58515  | 6.37E-06 | 0.000520647 |
| f_JnRXubpfucFPJHk0 | RP2      | 6102   | 6.42E-06 | 0.000523388 |
| uLV.46guS0km6K7epQ | ARFGAP1  | 55738  | 6.59E-06 | 0.000535104 |
| 3VfuqJL54hgji6F7u0 | FOXP1    | 27086  | 6.70E-06 | 0.000542259 |
| orH6leltEXtjxfeouk | TSNAX    | 7257   | 6.92E-06 | 0.000553076 |
| TA8nq7jpR_op4jKINk | PDE7A    | 5150   | 7.03E-06 | 0.000553076 |
| 9Sft35eUe7g2mGiR5E | AXIN1    | 8312   | 7.03E-06 | 0.000553076 |
| cXyv45oN5YuOmnVSo4 | C19orf60 | 55049  | 7.03E-06 | 0.000553076 |
| K_CHD6i1N3c_ker2Pk | SLC22A15 | 55356  | 7.03E-06 | 0.000553076 |
| ZLaEl0UBIkoAotMgSE | HIF1A    | 3091   | 7.09E-06 | 0.000553076 |
| rn2nrSofrRK.9AqcZc | SNRNP35  | 11066  | 7.09E-06 | 0.000553076 |
| WnU11LpeEFYKSCn7.o | TLR8     | 51311  | 7.09E-06 | 0.000553076 |
| IMJRT3ugUKVXUZARXU | POU2AF1  | 5450   | 7.09E-06 | 0.000553076 |
| u_J4hFI50aI56ETAKI | PAOX     | 196743 | 7.09E-06 | 0.000553076 |
| HueP7_jP4QpHeO4fV4 | SCYL2    | 55681  | 7.09E-06 | 0.000553076 |
| ZhcUqEJKwieO4u7uOo | CD1D     | 912    | 7.14E-06 | 0.000555587 |
| Nokkjp3a9Su6hziiog | DNPH1    | 10591  | 7.25E-06 | 0.000560561 |
| QyijqdIRS4f.cInVps | CDK9     | 1025   | 7.25E-06 | 0.000560561 |
| iqJ4_ySXby7RVddXjc | CD79A    | 973    | 7.37E-06 | 0.000565471 |
| rpLUI4X95EdSEB9UhA | GLG1     | 2734   | 7.37E-06 | 0.000565471 |
| H.jdJ1dfVSitOJJBCU | ENTHD2   | 146705 | 7.59E-06 | 0.000580617 |
| OnU0rkqj_ngpuTP16k | MANBAL   | 63905  | 7.70E-06 | 0.000587217 |
| OXEnqOxeilyqsvdXHk | PHF1     | 5252   | 7.81E-06 | 0.000593775 |
| iXpUnp.XtUDSUuzDSU | PLSCR1   | 5359   | 7.97E-06 | 0.000604489 |
| uuuOTlzL.Jx_oq6XiU | ZNF562   | 54811  | 8.03E-06 | 0.000604859 |
| TnHkoUgkQLmv1Ql.tQ | SLC45A3  | 85414  | 8.03E-06 | 0.000604859 |
| Ev6D5_KBXm7n6lpSKk | B3GALT6  | 126792 | 8.14E-06 | 0.00061128  |
| Ti9eLozmDf633YSuV8 | XK       | 7504   | 8.31E-06 | 0.000621805 |
| 9qV056f9FUihEpJ9QA | MFGE8    | 4240   | 8.53E-06 | 0.000636398 |
| K_uqerFDnkrQSc56yk | IL15     | 3600   | 8.64E-06 | 0.000642661 |
| N66ifui2jRsXuSAWXc | C7orf50  | 84310  | 8.69E-06 | 0.000642788 |
| 3Euf7Fo3ngk3tSes14 | KAT2B    | 8850   | 8.69E-06 | 0.000642788 |
| Z56L7qk1dQpeHV.Rxc | ANKZF1   | 55139  | 8.97E-06 | 0.00065919  |
| 6JXeJWJXRUR03NkE4  | LIN37    | 55957  | 8.97E-06 | 0.00065919  |
| HnVfl7oE_3rXJ7r1T4 | KANSL1   | 284058 | 9.14E-06 | 0.000667303 |
| 0s5LuCiSck33R7nkDc | UBE2E3   | 10477  | 9.14E-06 | 0.000667303 |
| EqXV_FUsYLc5Xg1Uiw | SASH3    | 54440  | 9.30E-06 | 0.000677371 |
| ieueeSjOmp9kX.tBeQ | FBXL15   | 79176  | 9.69E-06 | 0.000703457 |
| 9g9CEuEk8bRV6oSK0k | ARRDC2   | 27106  | 9.75E-06 | 0.000705339 |
| 6w1bzod7dSiKrc1FXk | BTN3A1   | 11119  | 1.00E-05 | 0.000720676 |
| 3LFHUCkKBTj4QS0J7o | ZBTB44   | 29068  | 1.01E-05 | 0.000720676 |



|                     |         |        |          |             |
|---------------------|---------|--------|----------|-------------|
| unqt_sgmbkAlPeh9eg  | GSDMB   | 55876  | 1.01E-05 | 0.000720676 |
| 9Qh1Z6U6LpeAiJCBO4  | SPTLC1  | 10558  | 1.01E-05 | 0.000720676 |
| Kv1dT13TuSEq_IFLIc  | C9orf40 | 55071  | 1.02E-05 | 0.000726427 |
| cSSDdKTNdJQUgHpLpl  | RWDD3   | 25950  | 1.03E-05 | 0.000729978 |
| QeVmH2TSoWTnj_x53c  | DNAL4   | 10126  | 1.03E-05 | 0.000729978 |
| xVZRQfH8UXOHsftLOI  | ACSL3   | 2181   | 1.04E-05 | 0.000735226 |
| Qz8qQwkk_l6LlIm0XU  | RETN    | 56729  | 1.05E-05 | 0.000735226 |
| oX1enTfpfqi_X8p_LU  | CCBL1   | 883    | 1.05E-05 | 0.000735226 |
| Ncfo3les3SjruUuhUg  | TLR6    | 10333  | 1.05E-05 | 0.000736103 |
| BLyXKCXVLTXgoX.h.k  | UGGT1   | 56886  | 1.06E-05 | 0.000736103 |
| ldQuehFZO7BBJZ96Bo  | GZMM    | 3004   | 1.06E-05 | 0.000736103 |
| xyeqUp93VRRReSP3558 | PCBP4   | 57060  | 1.06E-05 | 0.000736103 |
| N7R5zufUVmWotUetyA  | TMEM219 | 124446 | 1.06E-05 | 0.000736103 |
| IVEu4JAiEvoWTT5QH0  | DHX15   | 1665   | 1.07E-05 | 0.000741627 |
| H1.UHcXV0didf1XjSI  | NA      | NA     | 1.09E-05 | 0.000744979 |
| OnhUk0IEd6voA7_Xvo  | IFIT2   | 3433   | 1.09E-05 | 0.000744979 |
| ul6loQqDCFHTLinPqk  | AFF1    | 4299   | 1.09E-05 | 0.00074664  |
| ldLVR9eQEOI5Fc1fu4  | SLC14A1 | 6563   | 1.11E-05 | 0.000755851 |
| rLhAS3msHg10irEs18  | TERF1   | 7013   | 1.12E-05 | 0.000759084 |
| xldZVZKfe7nnB7Pz7g  | TSPYL2  | 64061  | 1.12E-05 | 0.000759084 |
| Nic3pfHfLL.yxuehFE  | RIOK3   | 8780   | 1.13E-05 | 0.000762281 |
| BTd5QAURFd7ozozg9U  | STAG1   | 10274  | 1.13E-05 | 0.000762281 |
| 6GujnvB.fX1XSkOmuE  | ZNF585A | 199704 | 1.14E-05 | 0.000763866 |
| xK1SQRTqeknjepApCc  | RTBDN   | 83546  | 1.15E-05 | 0.000766837 |
| 65HhOClOK9SvkkpuKQ  | SYTL3   | 94120  | 1.15E-05 | 0.000766837 |
| rjovhekON7pwTlt3eU  |         | 23157  | 1.16E-05 | 0.000766837 |
| rTMbuWrUoqQYtMUktc  | CD79A   | 973    | 1.16E-05 | 0.000766837 |
| 37Huig_berwSNJ84hl  | TIAL1   | 7073   | 1.16E-05 | 0.000766837 |
| oLp5.f_uFdSq6DaLu0  | ZDHC14  | 79683  | 1.16E-05 | 0.000766837 |
| HnqVXFVQ9DXIDA17c   | IL21R   | 50615  | 1.16E-05 | 0.000766837 |
| rSCAiQVFAXBChVYEF0  | CDK2AP1 | 8099   | 1.17E-05 | 0.000766837 |
| 9Vyi_DX3V5cXkk3X9U  | RBM4B   | 83759  | 1.17E-05 | 0.000766837 |
| 6VOA0UNCl1vfcCPLU0  | LGALS8  | 3964   | 1.17E-05 | 0.000768366 |
| 0YsncAQFF4UIqC4n7k  | ARPC5   | 10092  | 1.18E-05 | 0.000769309 |
| 6NSmokgnAlAlQiLpLk  | MAGED2  | 10916  | 1.19E-05 | 0.000769309 |
| ood7Xu0Xd1K7Unt05c  | PLEKHF1 | 79156  | 1.19E-05 | 0.000769309 |
| fn1IPzBE4IVACWoekk  | RGS10   | 6001   | 1.19E-05 | 0.000770236 |
| ukkActB_ULR55Tu7Hs  | SASH1   | 23328  | 1.20E-05 | 0.000770236 |
| fuJEI4v5XtiueKXql8  | HK1     | 3098   | 1.20E-05 | 0.000770236 |
| 3ulgmeLXuQToC5ICKI  | VRK2    | 7444   | 1.21E-05 | 0.000776758 |
| 9VP14hRSliqIJeO_Eg  | LCK     | 3932   | 1.21E-05 | 0.000776758 |
| IXgFH1UnytXe8176XU  | TBX19   | 9095   | 1.22E-05 | 0.000778224 |
| xV7sX7V0.57hFeACeE  | CHN2    | 1124   | 1.22E-05 | 0.000779682 |

|                    |         |        |          |             |
|--------------------|---------|--------|----------|-------------|
| BpJ8leKVIhee1.91_I | SMCR7L  | 54471  | 1.25E-05 | 0.000795207 |
| EknPgK8ep1SU0yST94 | UBQLN1  | 29979  | 1.26E-05 | 0.000800122 |
| uJ5XT1h9IA2CSemXVc | SPTAN1  | 6709   | 1.28E-05 | 0.000808511 |
| Trg5RNFpqvOhd_TtMk | PHKB    | 5257   | 1.29E-05 | 0.000813365 |
| KsX5EfPHI0vvl6IbCg | SPPL2A  | 84888  | 1.32E-05 | 0.00083212  |
| TESrDPN5xHoKWcoJXY | JKAMP   | 51528  | 1.33E-05 | 0.000833415 |
| uiQ_tAlp._.VQqglek | USP12   | 219333 | 1.35E-05 | 0.000839786 |
| x1XT6BAF8B6iBfLVd0 | RAB6A   | 5870   | 1.35E-05 | 0.000839786 |
| ZoiyXnVEe0ejtOqUMA | SUMF2   | 25870  | 1.35E-05 | 0.000839786 |
| 6d3ulupJFtzxSpA7eE | NCR3    | 259197 | 1.36E-05 | 0.000839786 |
| fAAoNnp6kq6dO3MN0k | TRIM13  | 10206  | 1.36E-05 | 0.000839786 |
| 0VJPE0E5W5L0BYLWsk | CEP192  | 55125  | 1.36E-05 | 0.00084104  |
| W9xeVx9iC42aZJuhV8 | TMEM134 | 80194  | 1.37E-05 | 0.000843841 |
| K9_EHedf6p6cceSt1I | FCGR1B  | 2210   | 1.38E-05 | 0.000843841 |
| WiQB5EB_RPoC5BC9W4 | BNIP3L  | 665    | 1.38E-05 | 0.000843841 |
| 0UJD25LqOJx.lJyKWU | DCTN3   | 11258  | 1.38E-05 | 0.000843841 |
| 9uVRJH_8xd5REfRkmY | URGCP   | 55665  | 1.38E-05 | 0.000843841 |
| ETS.78dNdSgeStC_0o | PTGER2  | 5732   | 1.39E-05 | 0.000845066 |
| 38ynuplq3gK6n_qy5U | EPB41   | 2035   | 1.41E-05 | 0.00085636  |
| NKfnjLLj8XuVaEXp0o | NPAT    | 4863   | 1.42E-05 | 0.000857547 |
| ciX3e.eqXVUUyd49UU | HDAC7   | 51564  | 1.44E-05 | 0.000861917 |
| WoSj2PCz1d_0B6Ccqq | ZDHHC2  | 51201  | 1.47E-05 | 0.000861917 |
| E6p0qXfxTuS4U.dlko | TECPR1  | 25851  | 1.47E-05 | 0.000861917 |
| cw3oT2KD6We0efvv5k | PTEN    | 5728   | 1.47E-05 | 0.000861917 |
| c1_Oet3kRM5_vH5OT0 | DSE     | 29940  | 1.47E-05 | 0.000861917 |
| Qt4iQSFdNN7I6CL0e0 | LMAN2L  | 81562  | 1.48E-05 | 0.000861917 |
| Z_5NCdNll69uVhNXS0 | ANO9    | 338440 | 1.48E-05 | 0.000861917 |
| fpUqtyTULTWXegwVT0 | NLRC5   | 84166  | 1.48E-05 | 0.000861917 |
| 6R7cpxBKPcror7k77U | LDHA    | 3939   | 1.48E-05 | 0.000861917 |
| NclKgfINCPXsUpUaW0 | SIN3B   | 23309  | 1.48E-05 | 0.000861917 |
| T1oqmlq7G0E0tFWM64 | LTB     | 4050   | 1.48E-05 | 0.000861917 |
| rgrIT70ikCIJea_k4o | SPPL3   | 121665 | 1.48E-05 | 0.000861917 |
| ZLdgoJiBgN3T7uW7p0 | CLCN3   | 1182   | 1.48E-05 | 0.000861917 |
| HpfZ_Tz_pft0jgfiuU | MXI1    | 4601   | 1.48E-05 | 0.000861917 |
| oUtfe0t1jINOSXryiQ | CDKN2C  | 1031   | 1.48E-05 | 0.000861917 |
| uKYagmautp6rWnXogQ | FBXO7   | 25793  | 1.49E-05 | 0.000861917 |
| uokS6Ol_7V2pOEplBg | TRAF2   | 7186   | 1.49E-05 | 0.000861917 |
| B7JXoXl19XapTH3v1M | TCTA    | 6988   | 1.49E-05 | 0.000861917 |
| E44pL8n5SrjjAlStXk | FECH    | 2235   | 1.50E-05 | 0.000863189 |
| i3nllqhAhuR0F9xSIE | RGCC    | 28984  | 1.50E-05 | 0.000863189 |
| 9uBEpOmkguUAuJXdSQ | FAM159A | 348378 | 1.51E-05 | 0.000863189 |
| Wk_IV4KEXqO.Uv6pz0 | CNNM3   | 26505  | 1.51E-05 | 0.000863189 |
| ZeSuAUFJXu8iigCal4 | TATDN2  | 9797   | 1.52E-05 | 0.000867461 |

|                    |           |        |          |             |
|--------------------|-----------|--------|----------|-------------|
| oik6lKwA_pci4le57Y | TSPYL1    | 7259   | 1.55E-05 | 0.000884346 |
| 3LoTU6OIDmjOoeIUnU | SNORD99   | 692212 | 1.56E-05 | 0.000888488 |
| TfX8Kh7N.L04VNNJ5c | CCDC176   | 80127  | 1.57E-05 | 0.000888488 |
| TS7jB4mtk6SKE1V0i4 | TRAK2     | 66008  | 1.57E-05 | 0.000888488 |
| rfqvqsrlxQOAR.ShfU | PARP9     | 83666  | 1.58E-05 | 0.000888488 |
| BgnCcrucDoPoJUeX1Q | AASDHPPT  | 60496  | 1.58E-05 | 0.000888488 |
| fiS72gJ_7feXrp705o | CLASP2    | 23122  | 1.58E-05 | 0.000888488 |
| NXhfbd7kYe8eh0ZJ44 | POLRMT    | 5442   | 1.58E-05 | 0.000888488 |
| WVI_nU6AKKBjv1sA_E | TARS      | 6897   | 1.59E-05 | 0.000889511 |
| Wl4.X.ow4KTfy0cXfc | SNORD11   | 692058 | 1.59E-05 | 0.00089053  |
| oRWPjKlu05LSWB1h94 | NA        | NA     | 1.61E-05 | 0.000894629 |
| xNFeljh4IWKIQRIO6M | ZNF335    | 63925  | 1.63E-05 | 0.000902769 |
| olELoy6ce76OkS9AOU | BEND2     | 139105 | 1.63E-05 | 0.000902769 |
| fOgUke5ohSfQomgp6U | WASH2P    | 375260 | 1.64E-05 | 0.000905692 |
| cgCe7bvV7gHiSu7vpk | ABLIM1    | 3983   | 1.64E-05 | 0.000905692 |
| uikKhU1ylZ.fliUJJ8 | ZFYVE27   | 118813 | 1.64E-05 | 0.000905692 |
| cQO5fddUoFsfScd65c | LTF       | 4057   | 1.67E-05 | 0.000914631 |
| BVSVyV.Jf0V7negKcU | NA        | NA     | 1.67E-05 | 0.000914631 |
| ukpKBLurg_c6brC5Us | ALDH1A1   | 216    | 1.67E-05 | 0.000914631 |
| T5qWZSkUHS7_Ou.v.U | LY9       | 4063   | 1.68E-05 | 0.000918591 |
| reWD4lpeP0nUUjkj_4 | GBE1      | 2632   | 1.69E-05 | 0.000919518 |
| 6uXSvDrgDEiITnSUUU | SCAF8     | 22828  | 1.72E-05 | 0.000935481 |
| x9EjUWeKKAS5ImJ5UQ | LOC650368 | 650368 | 1.75E-05 | 0.000942912 |
| BXUjpPTt8dICpHIPtU | PAQR8     | 85315  | 1.75E-05 | 0.000942912 |
| WhXnqEUoQoIS.Zd2Ak | TMC6      | 11322  | 1.75E-05 | 0.000942912 |
| ZxJVFxHooS0gJTtS0  | TRMT1L    | 81627  | 1.78E-05 | 0.000942912 |
| 3lghXneueIEF.inqKI | PYGO2     | 90780  | 1.78E-05 | 0.000942912 |
| Qnoq7ej.c4nFQcW6Sk | CRYGS     | 1427   | 1.78E-05 | 0.000942912 |
| 9uoCrUj.Arn8K_V3lg | SIAH2     | 6478   | 1.78E-05 | 0.000942912 |
| E9RRvdYq.qDt7l9Hu0 | TMEM8B    | 51754  | 1.78E-05 | 0.000942912 |
| 6DkeBeh_qgllizfUlk | SCAP      | 22937  | 1.78E-05 | 0.000942912 |
| rrSTqTOwDtf96_Xdzk | TMED7     | 51014  | 1.78E-05 | 0.000942912 |
| 01ZKfb_XUgX1bePvXU | PNOC      | 5368   | 1.78E-05 | 0.000942912 |
| 0qVS76JdKCBSQCEtQY | RBM6      | 10180  | 1.78E-05 | 0.000942912 |
| Ke39X1FRLwUoDXIN1k | C19orf55  | 148137 | 1.79E-05 | 0.000943756 |
| rVaF0DV6mFLG4CGD8o | ACN9      | 57001  | 1.79E-05 | 0.000944598 |
| 0J53x7JOuXTsBUR6Jg | ARL6IP6   | 151188 | 1.80E-05 | 0.000945435 |
| i0q31Trr0gyOJMkK.4 | NA        | NA     | 1.83E-05 | 0.000953706 |
| iZLD3TtVMJIntEu5HE | TBPL1     | 9519   | 1.83E-05 | 0.000953706 |
| ozocU6JIDbiX2.ntHI | C3orf38   | 285237 | 1.83E-05 | 0.000953706 |
| lj3sBXotOu_eo5rI80 | SLC25A24  | 29957  | 1.84E-05 | 0.000955323 |
| HpQklBTnQfa5d3Ukh4 | KLF10     | 7071   | 1.84E-05 | 0.000955323 |
| K0wQGrT6QpK2QWenqQ | MRPL2     | 51069  | 1.87E-05 | 0.000970483 |

|                    |           |        |          |             |
|--------------------|-----------|--------|----------|-------------|
| NtP3xVOe9XohV7o90k | FASTKD3   | 79072  | 1.89E-05 | 0.000977136 |
| 9Ggo7Al01ygokJV3kl | KIAA1551  | 55196  | 1.90E-05 | 0.000977136 |
| BkiUXXMhIT5XnnsR9I | SLMO2     | 51012  | 1.90E-05 | 0.000977136 |
| KDct6V64dGX9oplrql | APOBEC3D  | 140564 | 1.90E-05 | 0.000977136 |
| KuXKK3qj139uutHBfE | FAM46C    | 54855  | 1.90E-05 | 0.000977136 |
| 01S9SfXAMhLqzakktE | EPB41     | 2035   | 1.92E-05 | 0.000983551 |
| Wpz7X7s14SZTu7SVOO | YWHAH     | 7533   | 1.96E-05 | 0.000999122 |
| HFuuXp.B1RV5zh13eQ | NCDN      | 23154  | 1.96E-05 | 0.000999122 |
| xa8KoVExS5Qqo7QuuM | CTDSP1    | 58190  | 1.97E-05 | 0.001002634 |
| Wce7hKPuel0iSo5ArA | C2orf68   | 388969 | 1.98E-05 | 0.00100332  |
| rk_eIEBUXiRVIRfXQU | LST1      | 7940   | 1.99E-05 | 0.001009612 |
| rtUCL_OKV1EXmlQ1Cs | UBTF      | 7343   | 2.01E-05 | 0.001015878 |
| OT7_ShgB94vEnSgCXk | RAB6A     | 5870   | 2.04E-05 | 0.001030495 |
| 9OdyR1f13l2l4p6hPE | C20orf196 | 149840 | 2.08E-05 | 0.00104286  |
| i0I6N3dlGkW0nX_6UI | FBLN1     | 2192   | 2.08E-05 | 0.00104286  |
| NJ7096Q4.pBLmrrXYk | DUSP8     | 1850   | 2.08E-05 | 0.001043454 |
| uiB4gqpnq1ivegCQgc | NA        | NA     | 2.10E-05 | 0.001049583 |
| c5OkDXtrdS_vN4MuOU | TGFBR3    | 7049   | 2.14E-05 | 0.001066742 |
| QdJ_t1ZKfSABUPkbuo | PWWP2B    | 170394 | 2.17E-05 | 0.001078313 |
| Nge0KiueiKjwXueXqE | PAQR7     | 164091 | 2.19E-05 | 0.001089837 |
| fu.nip9e5SJUlliSuQ | RDH13     | 112724 | 2.23E-05 | 0.001104059 |
| 0VT9Ov9LpB8eFfv.l4 | SNTB1     | 6641   | 2.24E-05 | 0.001104976 |
| 9aklvNW6.DAnImZ0UI | C11orf80  | 79703  | 2.24E-05 | 0.001104976 |
| cipJfQG7qtxLXStyko | OTUB1     | 55611  | 2.25E-05 | 0.001108161 |
| 3DOnEiJXnGbatSukgQ | GALK2     | 2585   | 2.28E-05 | 0.001122229 |
| fpRfVLXz3uneOFS8tc | DPEP2     | 64174  | 2.29E-05 | 0.001125366 |
| uqDXiAQ0SFE4hwohO4 | CRISP3    | 10321  | 2.31E-05 | 0.001131203 |
| ZS.1LRPrIPSh1J78Sg | YOD1      | 55432  | 2.33E-05 | 0.001137016 |
| 3TygusgH8DZVlv5e.U | NA        | NA     | 2.38E-05 | 0.001159015 |
| iSPq6y6ivuTopS4CeE | RPN1      | 6184   | 2.39E-05 | 0.001161037 |
| EdY3fYvBsoQeenOPuU | MORC3     | 23515  | 2.39E-05 | 0.001161037 |
| uFV6FUOLuvFBVSiRvc | RPP25L    | 138716 | 2.40E-05 | 0.001161037 |
| KSN0K_Muu9HKlboPiE | SAP30     | 8819   | 2.40E-05 | 0.001161037 |
| Tc56SFcOiHRecO_OeY | UBE2G1    | 7326   | 2.41E-05 | 0.001161037 |
| TtLPvPp.2z13wbgW3s | AASDHPT   | 60496  | 2.41E-05 | 0.001161037 |
| rltcu7lcV6dKfep3iA | CAMP      | 820    | 2.41E-05 | 0.001161369 |
| xooi192kidHkBB6D4o | SRGAP2    | 23380  | 2.42E-05 | 0.001161685 |
| WqFR3oF4oLrASnjK6g | HSD17B11  | 51170  | 2.43E-05 | 0.001161685 |
| 6VAoUIjUX0g6E49Kic | PTPN12    | 5782   | 2.45E-05 | 0.001161685 |
| fpTFFeBOXiftMM74sU | RMI1      | 80010  | 2.45E-05 | 0.001161685 |
| ODRJ3qABBgH9X7oiio | FLI1      | 2313   | 2.45E-05 | 0.001161685 |
| HHSBFQy1yIVNdk6SQk | FTO       | 79068  | 2.45E-05 | 0.001161685 |
| rRyp6DKEkhVIJBMeto | RNF175    | 285533 | 2.45E-05 | 0.001161685 |

|                    |           |           |          |             |
|--------------------|-----------|-----------|----------|-------------|
| H11VOByAFHx1SD0rbk | TIMM23    | 100287932 | 2.46E-05 | 0.001161685 |
| 695JOXVUTdMkUr7t4U | RAPGEF6   | 51735     | 2.46E-05 | 0.001161685 |
| TrU1SkeshIV_97NVf4 | PBXIP1    | 57326     | 2.46E-05 | 0.001162009 |
| 03pfnDpBIIcP9.m61U | CXXC5     | 51523     | 2.48E-05 | 0.001166821 |
| rl1Ll9VboMBru14gFE | CD79B     | 974       | 2.49E-05 | 0.001166821 |
| Hi7g8eFUURFoUUliUo | COG7      | 91949     | 2.49E-05 | 0.001166821 |
| f5woU84pxJDkWPJJQo | PSMD10    | 5716      | 2.50E-05 | 0.001166821 |
| KkRZe3SjN_7jl_SQ6k | C2orf88   | 84281     | 2.51E-05 | 0.001166821 |
| 3iUZ.47hLFki49VR4o | MLLT10    | 8028      | 2.51E-05 | 0.001166821 |
| 0Uvp50qljnc3px2zYE | ANKRA2    | 57763     | 2.51E-05 | 0.001166821 |
| NVJ7oUeXgK.sSOTIEs | ZNF207    | 7756      | 2.51E-05 | 0.001167131 |
| HZdfbr376_595d6GWQ | ATP5SL    | 55101     | 2.53E-05 | 0.001170307 |
| 0yoSKKWA1dVTn14V_8 | SH2B1     | 25970     | 2.53E-05 | 0.001170307 |
| WVCnV9UJ0uQF3R1Qv0 | ODF2      | 4957      | 2.54E-05 | 0.001171206 |
| iJaLrMN8aLVaUh.aXI | RPRD2     | 23248     | 2.55E-05 | 0.001171206 |
| 6eJUJKRPd9hV1dPS3k | MIAT      | 440823    | 2.55E-05 | 0.001171206 |
| onInffXG.stJEeoBak | HIP1R     | 9026      | 2.56E-05 | 0.001176586 |
| WOudco80iXN.SdXI38 | NA        | NA        | 2.58E-05 | 0.001179409 |
| cuu52_TMS7Uq3RdSI4 | AKAP11    | 11215     | 2.58E-05 | 0.00117969  |
| iVTUrnNI4UvHny8HK4 | FRMD4A    | 55691     | 2.59E-05 | 0.001182496 |
| ig66z0utSj3sOfxEpl | ADAM10    | 102       | 2.60E-05 | 0.00118277  |
| Zzkrh7v4XVITzYnpZU | ASMTL     | 8623      | 2.64E-05 | 0.001200663 |
| EheiMqyXn_XuuoJOsE | BIRC2     | 329       | 2.65E-05 | 0.001202079 |
| HSwH2FNVICI5XT0n9I | PDSS1     | 23590     | 2.66E-05 | 0.001202079 |
| KRPfEVQDeT5T45M5FE | ZNF160    | 90338     | 2.67E-05 | 0.001202079 |
| ia5MgDSucSdiKkiUS0 | NADSYN1   | 55191     | 2.67E-05 | 0.001202079 |
| HkEgFzXR5XVS3d8C_g | CDKN1B    | 1027      | 2.67E-05 | 0.001202079 |
| HpypNJRIHiagOUfs_k | SUGP2     | 10147     | 2.67E-05 | 0.001202079 |
| QXp6BTiCgnSx9US7V4 | SMARCD1   | 6602      | 2.69E-05 | 0.001207281 |
| fUr.XrdIXOOH7V.jtE | CHMP2B    | 25978     | 2.70E-05 | 0.001209983 |
| okofzqkCXO0nd1CpHo | ZBTB3     | 79842     | 2.71E-05 | 0.001210201 |
| rk9NuKrf7Xex7d3X5U | ATP5B     | 506       | 2.71E-05 | 0.001210417 |
| ErvSh6wmHtNCwpVbno | BLK       | 640       | 2.75E-05 | 0.001225427 |
| ubSB5EiAPVSz1CWuZU | ZNF831    | 128611    | 2.78E-05 | 0.001235459 |
| fUR_ReNCJLn3U.v_SI | WAC       | 51322     | 2.79E-05 | 0.001235627 |
| WrOyCre0kROgJVT_RI | RAB11FIP2 | 22841     | 2.80E-05 | 0.001240699 |
| oX.SJH01H511dxXaRU | ACTR1B    | 10120     | 2.81E-05 | 0.001243305 |
| 6uT7nf1C9JL3NLrIE  | BNIP3L    | 665       | 2.82E-05 | 0.001245901 |
| W6E3_opbz3IRZFdb00 | TNFAIP2   | 7127      | 2.84E-05 | 0.001246344 |
| QsQggfgpXcbrkVRSfQ | ARHGAP8   | 23779     | 2.84E-05 | 0.001246344 |
| 0dWhfTRT6ISAf4rop4 | MAP2K3    | 5606      | 2.84E-05 | 0.001246344 |
| 6egQIQDgeLI6C.GXjl | WTAP      | 9589      | 2.86E-05 | 0.001253766 |
| f1N7fyid083a3evXDU | NPL       | 80896     | 2.87E-05 | 0.001256319 |

|                    |           |        |          |             |
|--------------------|-----------|--------|----------|-------------|
| 9efV5FU9UV4L3kXkX8 | CTSF      | 8722   | 2.89E-05 | 0.001256828 |
| xUeJ2kQq_IThK7887o | NA        | NA     | 2.89E-05 | 0.001256828 |
| IKW7SRjoVQEHrXx34  | FCAR      | 2204   | 2.90E-05 | 0.001256828 |
| OWGoE3UEgkAaAuXVoU | CACTIN    | 58509  | 2.90E-05 | 0.001256828 |
| TL1IRdRlRetd1TZUQA | AES       | 166    | 2.91E-05 | 0.001259353 |
| ouU0YUU0Ndn9CKSEtU | ITGB7     | 3695   | 2.92E-05 | 0.001259595 |
| TOjIB0rTQpQoUumAul | NAALADL1  | 10004  | 2.92E-05 | 0.001259595 |
| TXeWMF78I4dJIEWb9M | DYRK1A    | 1859   | 2.93E-05 | 0.001262101 |
| 9nqi7tXi07qeDXh.R0 | CRADD     | 8738   | 2.93E-05 | 0.001262217 |
| f7H6uyh3Lvfq7Pk6nk | ZFAND5    | 7763   | 2.97E-05 | 0.001272036 |
| 9oNJ3ZHITf5L.gAgPk | TMEM55A   | 55529  | 2.97E-05 | 0.001272036 |
| uEC Jfn31v_V.t2dc  | PLOD2     | 5352   | 2.97E-05 | 0.001272036 |
| EmidqPpwHVMs.Oullo | AES       | 166    | 2.98E-05 | 0.001274498 |
| i6dUKK7JK7iQzy5TuU | PRDX6     | 9588   | 3.00E-05 | 0.001276951 |
| fui6qfUrpX1aRE9T_8 | SMARCB1   | 6598   | 3.00E-05 | 0.001277039 |
| ZIHjsJd.l3n7TIPCdE | NA        | NA     | 3.05E-05 | 0.001291487 |
| fU61rr_y9fQLSkeonl | DENND4B   | 9909   | 3.06E-05 | 0.001291487 |
| TSXrRdeKDA54F0QIU0 | FAM83A    | 84985  | 3.06E-05 | 0.001291487 |
| ofX9ESFFWihG6OOq0g | PTDSS2    | 81490  | 3.06E-05 | 0.001291487 |
| WV_I5R.UrtfzR.hqHc | SH3PXD2A  | 9644   | 3.06E-05 | 0.001291487 |
| BnFfYoHotUiKXlUnQg | FASTK     | 10922  | 3.07E-05 | 0.00129388  |
| x5VeHjJP0g7t.4KnMU | GPR160    | 26996  | 3.09E-05 | 0.001298592 |
| 0k9AKLpXv97vAFU.rk | TMEM183B  | 653659 | 3.11E-05 | 0.001301053 |
| ZaVEV6DqIZNg0TqEjs | TCF4      | 6925   | 3.11E-05 | 0.001301053 |
| NBeKLqQ6597n.VX7BU | RIOK3     | 8780   | 3.11E-05 | 0.001301053 |
| IHnn1xeQhgQ7O.Qq4k | NA        | NA     | 3.16E-05 | 0.001319585 |
| uWeCeygmU99Xs3B6p4 | SCPEP1    | 59342  | 3.17E-05 | 0.001319609 |
| WSZ_siSd_inpuiKNA  | GNG10     | 2790   | 3.17E-05 | 0.001319609 |
| utxFSucJxEh6PSIFek | PRSS30P   | 124221 | 3.20E-05 | 0.001324227 |
| unEgEK22npomn6ACF8 | SBDSP1    | 155370 | 3.20E-05 | 0.001324227 |
| uukp6Lz4Jlukt9L_SI | IVNS1ABP  | 10625  | 3.20E-05 | 0.001324227 |
| xVIUOk88rfAsvHV924 | PPM1D     | 8493   | 3.22E-05 | 0.001326518 |
| BVWgXodWhfTRT6ISAc | MAP2K3    | 5606   | 3.22E-05 | 0.001326518 |
| uR3qd1Tk9AeK5eV9yg | NA        | NA     | 3.22E-05 | 0.001326518 |
| uUnkaFK9WQBPIJy4pM | DNAJA4    | 55466  | 3.23E-05 | 0.001326518 |
| TnebutbOgJesleYvCw | STAU1     | 6780   | 3.23E-05 | 0.001326518 |
| r2UV0U1Ck1r_KEOk3E | CD79B     | 974    | 3.25E-05 | 0.001331053 |
| rnPD9TX8kp6lcpKCek | PLEKHO2   | 80301  | 3.28E-05 | 0.001342364 |
| ZSCJRKBNPXdWQUdUVQ | CD79B     | 974    | 3.29E-05 | 0.001344566 |
| xlQLfki6juJlpP4dSo | LOC152217 | 152217 | 3.30E-05 | 0.001344566 |
| 6plQKnV6ceolxIFNe4 | AARS2     | 57505  | 3.33E-05 | 0.001350677 |
| WeyXq7G.R0L3XHih34 | NCOA7     | 135112 | 3.33E-05 | 0.001350677 |
| EnOL_5f54oRyBen5dU | MS4A6A    | 64231  | 3.34E-05 | 0.001350677 |

|                    |           |        |          |             |
|--------------------|-----------|--------|----------|-------------|
| K4f7A3IRFSelM1FXYY | CABIN1    | 23523  | 3.36E-05 | 0.001350677 |
| Tb3TnhqiBgLhKr9dMI | HEPACAM2  | 253012 | 3.36E-05 | 0.001350677 |
| 66I09TxHUI6kUoGAds | ZNF160    | 90338  | 3.38E-05 | 0.001350677 |
| ueklci9Mjof_oVJL.g | UBE2D3    | 7323   | 3.38E-05 | 0.001350677 |
| 0CVF5Bd7Sy3t4N.FL0 | ZFAND6    | 54469  | 3.38E-05 | 0.001350677 |
| cljQrX9YQngop4h2p4 | TPM1      | 7168   | 3.38E-05 | 0.001350677 |
| WXfb0X6dOt9Sr.zXp4 | PHKA2     | 5256   | 3.38E-05 | 0.001350677 |
| fJoiBH.p94qU_epyuQ | GABARAPL2 | 11345  | 3.38E-05 | 0.001350677 |
| 9oAjv6DOCoRLGstAVU | ZNF493    | 284443 | 3.40E-05 | 0.001350677 |
| le5N8_4pSftV2BXf6U | PRICKLE1  | 144165 | 3.40E-05 | 0.001350677 |
| WUTbfV7VDYUuzYaeLk | LCN2      | 3934   | 3.40E-05 | 0.001350677 |
| f5ea5PSEahFB9qGB5M | BUD31     | 8896   | 3.40E-05 | 0.001350677 |
| 9egCddI5EjESDSF_pA | NA        | NA     | 3.41E-05 | 0.001350677 |
| 3ISUkZdCsjoNVHrSIA | MPRIP     | 23164  | 3.44E-05 | 0.001356864 |
| oiVKryIQI_kEyQjXp0 | SLFN13    | 146857 | 3.45E-05 | 0.001356864 |
| BquVEBXuVUv3n96d58 | C19orf25  | 148223 | 3.45E-05 | 0.001356864 |
| 95M.odJTU8IFTvtd6E | VPS35     | 55737  | 3.46E-05 | 0.001356864 |
| rniefXv994_deqAEZc | SRSF8     | 10929  | 3.46E-05 | 0.001356864 |
| Qk.LS1VAS05Qe4KDtU | STAM2     | 10254  | 3.46E-05 | 0.001356864 |
| WUqkqw6vmM6nCSTkKc | PPM1A     | 5494   | 3.47E-05 | 0.001356864 |
| 0n1Pee10I2Fd97nofU | GID4      | 79018  | 3.47E-05 | 0.001356864 |
| un2SO1_OdM_9XP_Uuo | NA        | NA     | 3.49E-05 | 0.00136547  |
| K7RPvruR.ur315M8H4 | PPP2CA    | 5515   | 3.52E-05 | 0.001369657 |
| NCic.6rdv5UqKn6dRQ | DMWD      | 1762   | 3.52E-05 | 0.001369657 |
| 3fUjmJ6vn1eKIVnpQo | ARL6IP4   | 51329  | 3.54E-05 | 0.001376047 |
| cKfyV6FSSuKdp_jz3k | MAPK7     | 5598   | 3.58E-05 | 0.001384286 |
| 3K9eJfqoUvRXE1Sn3s | ZNF767    | 79970  | 3.58E-05 | 0.001384286 |
| KeaXa46TK0T.qL0iik | GLYCTK    | 132158 | 3.58E-05 | 0.001384286 |
| rWG7B0SWCR1NUj 3o  | SLC37A3   | 84255  | 3.58E-05 | 0.001384286 |
| TpR4VJV0g1RHUNf1P0 | OSBP2     | 23762  | 3.62E-05 | 0.001394874 |
| oks6Dr0onsLnZSAVIk | STXBP3    | 6814   | 3.64E-05 | 0.001401162 |
| fiSgOZ4dSJ6Va5I8K8 | TFPT      | 29844  | 3.69E-05 | 0.001419607 |
| Hqi3RRpw.jogr2KXEg | LIN52     | 91750  | 3.71E-05 | 0.001419607 |
| l.rKT77I4V4LzldepU | ACSL6     | 23305  | 3.71E-05 | 0.001419607 |
| KUg7rr3qQOI_6Ybog  | ZBTB4     | 57659  | 3.72E-05 | 0.001419607 |
| KXnsIfi6Xh6uvuKOQo | RNASEH2C  | 84153  | 3.72E-05 | 0.001419607 |
| Kn2SO1_OdM_9XD_Uuo | NA        | NA     | 3.77E-05 | 0.001433733 |
| 9rq.lyobsHEp.xwlCg | SPTLC1    | 10558  | 3.77E-05 | 0.001433733 |
| QXFcOUvUn03Ffi0z4o | FPR2      | 2358   | 3.78E-05 | 0.001433733 |
| 6R57u.31I4pNJtF2u4 | NA        | NA     | 3.78E-05 | 0.001433733 |
| u4rV4sNRVJwKQFfQ0o | NA        | NA     | 3.80E-05 | 0.00143986  |
| rmX0CK4J7aHECoLG60 | PRDX2     | 7001   | 3.82E-05 | 0.001442953 |
| xtPfn5H1XPhE4Ce764 | UBE2K     | 3093   | 3.83E-05 | 0.001442953 |

|                     |         |        |          |             |
|---------------------|---------|--------|----------|-------------|
| Zop4h2p4v5oitLBwPo  | TPM1    | 7168   | 3.84E-05 | 0.001442953 |
| I5QnSXRKUCTSRsBkRU  | NSUN5   | 55695  | 3.84E-05 | 0.001442953 |
| cndSXIQSJaFe3RQKAA  | COX19   | 90639  | 3.84E-05 | 0.001442953 |
| THcpENrtDZ3SnUue_0  | DDX60   | 55601  | 3.84E-05 | 0.001442953 |
| 91ed6iT5yX3FU1ejUQ  | BMF     | 90427  | 3.86E-05 | 0.001446922 |
| riFJ6pBM6lbdxIK.4   | TAB2    | 23118  | 3.89E-05 | 0.001457098 |
| Bgi3jgKWofCv.iC3IU  | RRM2B   | 50484  | 3.90E-05 | 0.001458963 |
| 0To4rSdft56uXIPeA   | CCDC12  | 151903 | 3.92E-05 | 0.001460823 |
| HV6v4JJen936wunrt0  | NA      | NA     | 3.95E-05 | 0.001470929 |
| 3XFfgiukScLp3NRXSc  | INTU    | 27152  | 3.97E-05 | 0.001474825 |
| 3FVBAGl6K0iCQOAJec  | SH2D2A  | 9047   | 3.98E-05 | 0.001476419 |
| NJQtGpKWS69_bpev88  | TMEM175 | 84286  | 3.98E-05 | 0.001476419 |
| oJEiuCghLmxqJS0uiQ  | NA      | NA     | 3.99E-05 | 0.00147777  |
| inufcoe6pV7ulTgvuA  | ZNF821  | 55565  | 4.00E-05 | 0.00147777  |
| ffpTrR9d.1Dd7pL.5U  | VNN2    | 8875   | 4.00E-05 | 0.00147777  |
| oS1deCo3DUo74Oo8_U  | PDCD10  | 11235  | 4.03E-05 | 0.00148366  |
| HugJshCiOSs_uLaNkk  | BCL2L1  | 598    | 4.05E-05 | 0.001484969 |
| ronhQJXBqUwR_FD0k   | FAM117A | 81558  | 4.05E-05 | 0.001484969 |
| ITP0kv5R7h7ekJVSOk  | IREB2   | 3658   | 4.05E-05 | 0.001484969 |
| uk7Fop4illr2Iernxl  | IFT172  | 26160  | 4.06E-05 | 0.001486755 |
| IEo1VlhVP5d0EdIX0E  | SF3A3   | 10946  | 4.11E-05 | 0.001502176 |
| QSruB.dU6.Ld4ZpHqU  | KLHDC4  | 54758  | 4.12E-05 | 0.001502176 |
| ERYgbff3Pjp6Nz.SIU  | DHX29   | 54505  | 4.12E-05 | 0.001502176 |
| ZSi56ddu.rirouKVeQ  | TAF1C   | 9013   | 4.13E-05 | 0.001503925 |
| iKh.vylCgomgsqQdrU  | BCL2L2  | 599    | 4.15E-05 | 0.001507682 |
| rS95N4xbdf1eC3pEU4  | QPCT    | 25797  | 4.18E-05 | 0.001517457 |
| 9U4FV8CUIsXV3_JILU  | MYOF    | 26509  | 4.19E-05 | 0.001519175 |
| NK57uluO5liS4qKvTg  | CNNM3   | 26505  | 4.22E-05 | 0.001526597 |
| 6V6oD46u6S6F7giog0  | ANO6    | 196527 | 4.23E-05 | 0.001526597 |
| Qn9O1SB8l.F7gu8cSU  | CYP1B1  | 1545   | 4.25E-05 | 0.001527687 |
| i6X_oCNlikiukShLao  | B4GALT1 | 2683   | 4.25E-05 | 0.001527687 |
| 9uSJFUH_R05JLXEEX0  | TUBGCP6 | 85378  | 4.25E-05 | 0.001527687 |
| Hrhc16V3HSAWkP7fRO  | SPTSSA  | 171546 | 4.26E-05 | 0.001528768 |
| Op56h222vph1aG8rL8  | SRP9    | 6726   | 4.26E-05 | 0.001528768 |
| cRUUpDfl96.fUIE_lf0 | FHL2    | 2274   | 4.27E-05 | 0.001528768 |
| ogqFMlospXr157Xrp4  | NUMA1   | 4926   | 4.29E-05 | 0.001534406 |
| u5zuNQFSOFVy5SI_Ro  | UBE2D3  | 7323   | 4.30E-05 | 0.001536073 |
| iglSihwJ4ATV577jlg  | SLC30A1 | 7779   | 4.31E-05 | 0.001537421 |
| cSHeDlh7uh3fXSHuqE  | MDFIC   | 29969  | 4.32E-05 | 0.001537421 |
| uJfLAGuALHVlaGakVs  | DDX51   | 317781 | 4.34E-05 | 0.001541044 |
| Ker.S7XJoOQspJSvt4  | NFIX    | 4784   | 4.37E-05 | 0.001550553 |
| ZUSvL0tAkpBVfupHhU  | LAPTM5  | 7805   | 4.39E-05 | 0.001554146 |
| i6g.p9Md.f5BJLverg  | RNF14   | 9604   | 4.41E-05 | 0.001555094 |



|                    |          |        |          |             |
|--------------------|----------|--------|----------|-------------|
| i4et1wUK5HiCQ0Gra0 | DYRK1A   | 1859   | 4.41E-05 | 0.001555094 |
| Qllyy9XtECo5Qp8WN4 | FYN      | 2534   | 4.41E-05 | 0.001555094 |
| QjpTeSFCCQldBIHg3E | DDX60L   | 91351  | 4.42E-05 | 0.001556708 |
| HzMoM5x_XXV5P126pE | UBE2W    | 55284  | 4.45E-05 | 0.001563813 |
| QeFFdTSS3Vdbrbf74Q | FAM83A   | 84985  | 4.45E-05 | 0.001563813 |
| fKVEOXu10U8tW5JeCE | VPREB3   | 29802  | 4.47E-05 | 0.001565059 |
| EKSLhf03jnCVcQv4go | CCDC121  | 79635  | 4.47E-05 | 0.001565059 |
| BTijB9fIXneyUXX6RY | LDLRAP1  | 26119  | 4.52E-05 | 0.001577533 |
| 6qt7iLE7PMxCRBK5E  | ACSL1    | 2180   | 4.52E-05 | 0.001577533 |
| l6p14BF2.4K4N.r.dU | ZBTB24   | 9841   | 4.52E-05 | 0.001577533 |
| lR0uV96zTeUIUqXn0U | GGA2     | 23062  | 4.54E-05 | 0.001581025 |
| 3i.g3ejU8d0leaeh1l | HPS5     | 11234  | 4.55E-05 | 0.001582581 |
| WpPF0SahxEvnp.nXqQ | FAM160B2 | 64760  | 4.58E-05 | 0.001589138 |
| NIWLnLI9.6j75VWrfw | FBXL8    | 55336  | 4.59E-05 | 0.001589138 |
| EnShOkpEpnh.d9f4l4 | CCNL1    | 57018  | 4.59E-05 | 0.001589138 |
| iliJRH9CwFK66IVTX4 | CRIP1    | 1396   | 4.62E-05 | 0.001596416 |
| 66tP1v 7e.1XX14    | SYT15    | 83849  | 4.65E-05 | 0.001603673 |
| QJ4C6qwK6LDe6P7974 | FGFR1OP2 | 26127  | 4.69E-05 | 0.001616635 |
| KvX645z7.ljqJH00r0 | JMJD1C   | 221037 | 4.71E-05 | 0.001619189 |
| 0lV4pTfnpLcX4Hkg6w | CNOT10   | 25904  | 4.72E-05 | 0.001619189 |
| ZSQknRcXogMWlQEink | PTP4A3   | 11156  | 4.72E-05 | 0.001619189 |
| HcUcyOKuKlKi5JXiXk | CD40LG   | 959    | 4.74E-05 | 0.001624463 |
| ETjuvUikYolQhTR4Ys | CNOT3    | 4849   | 4.77E-05 | 0.001633513 |
| uAAYeVNWrX9Xjq_qS8 | MAP2K3   | 5606   | 4.79E-05 | 0.001636859 |
| Kue_vVAHICCGkqJrLU | PPP2R5D  | 5528   | 4.84E-05 | 0.001649185 |
| 9T9eIUSliqIJeO_Egk | LCK      | 3932   | 4.84E-05 | 0.001649185 |
| oi4VIXeF_FXjd3TVS0 | NA       | NA     | 4.86E-05 | 0.001654379 |
| T8VSWtQXjXu1T7CiCg | ITGB1    | 3688   | 4.88E-05 | 0.001659559 |
| roortRPzruzKwTqgDk | POC1B    | 282809 | 4.90E-05 | 0.001660966 |
| r326XQ5XX810399zkg | SLC31A2  | 1318   | 4.93E-05 | 0.001667035 |
| ER1CPOl2pC5764iHeg | HEXB     | 3074   | 4.93E-05 | 0.001667035 |
| cSjf60VRnlU35ee9S8 | CORO7    | 79585  | 4.93E-05 | 0.001667035 |
| KMrUN53QpfrXrqPX0U | TNFRSF21 | 27242  | 4.97E-05 | 0.001675897 |
| fINFKOgRK35KNH4Bfc | NA       | NA     | 4.98E-05 | 0.001676779 |
| Q5Qolv95e0AUTSN354 | UGP2     | 7360   | 4.98E-05 | 0.001676779 |
| lRupl54_hSGll40ol8 | SIVA1    | 10572  | 5.01E-05 | 0.001681371 |
| o1dlBpYn7j3ifkOWUI | CRTC1    | 23373  | 5.01E-05 | 0.001681371 |
| 61Q67IUumOjcovxQel | TSC22D1  | 8848   | 5.04E-05 | 0.001686784 |
| laPilfrU37dKIIBf3U | RALGPS2  | 55103  | 5.05E-05 | 0.001686784 |
| l0flqIh.8QdN5J1q5o | CACNG6   | 59285  | 5.06E-05 | 0.001686784 |
| xqAt4uAo6XT3f3Dfno | CERK     | 64781  | 5.06E-05 | 0.001686784 |
| Nnhs.TpLQtQ6SbfbWo | DHX30    | 22907  | 5.07E-05 | 0.001688965 |
| xQVNpRVCV3kFGDYe3c | RS1      | 6247   | 5.08E-05 | 0.001688965 |

|                     |           |           |          |             |
|---------------------|-----------|-----------|----------|-------------|
| Wy4KIUC6gqfypHjlpU  | RNF145    | 153830    | 5.08E-05 | 0.001688965 |
| lxqtHVEuCQp4eOMeWQ  | RNFT1     | 51136     | 5.13E-05 | 0.001701324 |
| ic_eBV7U1GoV4B1H6U  | TRADD     | 8717      | 5.14E-05 | 0.001704475 |
| xuRMoOJ9I5L6UkCluM  | ROCK1     | 6093      | 5.17E-05 | 0.00170945  |
| 3ujikDscdKC3opwtBE  | C11orf65  | 160140    | 5.18E-05 | 0.001712581 |
| ulyDNeS6yL_dT1IlyU  | UPF3A     | 65110     | 5.19E-05 | 0.001712812 |
| ff7kki6fEerdDOVd_k  | CNIH      | 10175     | 5.21E-05 | 0.001712812 |
| xRJygl8AO056z6nEFo  | LRRK2     | 120892    | 5.21E-05 | 0.001712812 |
| Wiefh0Wn1z_ORUpVfs  | POLM      | 27434     | 5.24E-05 | 0.0017232   |
| oUXe1f1aONWAOCfXpQ  | NA        | NA        | 5.32E-05 | 0.001743891 |
| WxN5R0liqFedEl9xOs  | LEPRE1    | 64175     | 5.32E-05 | 0.001743891 |
| Wl.OUIYReew_q5OJzo  | PHF17     | 79960     | 5.38E-05 | 0.001761442 |
| QCKUCKVSWELjZUQl8c  | GHRL      | 51738     | 5.42E-05 | 0.001769888 |
| x7R527rdSQqPamCEBo  | CXXC5     | 51523     | 5.44E-05 | 0.001769888 |
| Wd81SeQoS2CjOUXa.0  | EIF4G2    | 1982      | 5.44E-05 | 0.001769888 |
| Wil.c.5LE1I.f6EkVY  | TCAIM     | 285343    | 5.44E-05 | 0.001769888 |
| Kr544ac67tsTX7qlgU  | CPT1A     | 1374      | 5.45E-05 | 0.001769888 |
| NirukA6Jf0TXLrpT_s  | ARMCX3    | 51566     | 5.46E-05 | 0.001769888 |
| H0p0.sd31XdNtOtKd4  | CCNDBP1   | 23582     | 5.46E-05 | 0.001769888 |
| HbOknjsgizOPgYUiU   | PDCD10    | 11235     | 5.47E-05 | 0.001771081 |
| r..t6KDqhFAHT_kkis  |           | 4735      | 5.50E-05 | 0.001779432 |
| xc2W1X.kld3qjoerA4  | CD3E      | 916       | 5.53E-05 | 0.001783569 |
| rU.5WD18RXiUBWo7f4  | P2RY12    | 64805     | 5.53E-05 | 0.001783569 |
| ZirTd9z7F5JGfXqe8Q  | ALG13     | 79868     | 5.55E-05 | 0.001788304 |
| TiHquTdSJR0RXQXb9c  | ZSWIM4    | 65249     | 5.57E-05 | 0.001788844 |
| ruGnrh46OrLqellqhw  | KIFC2     | 90990     | 5.57E-05 | 0.001788844 |
| 3X60iodK.qEkQngp6l  | ZBTB9     | 221504    | 5.59E-05 | 0.001791776 |
| oudu78lxv.dOXU8Uvk  | FUBP3     | 8939      | 5.62E-05 | 0.001795847 |
| uqc7KSvDXUfdO6_BS4  | TERF2     | 7014      | 5.62E-05 | 0.001795847 |
| HUqSjd1_x.pJTICbnQ  | NELFB     | 25920     | 5.75E-05 | 0.001833457 |
| BnCDIe6t10fulS5394  | CLIP4     | 79745     | 5.75E-05 | 0.001833457 |
| iRlc5L3iCuikUp0Aig  | FCRL5     | 83416     | 5.83E-05 | 0.001857479 |
| 9criZPiUuucDnEx1B4  | CEACAM6   | 4680      | 5.86E-05 | 0.00186382  |
| rgqlbqLTdBTVdbpNF8  | CXCR5     | 643       | 5.92E-05 | 0.0018807   |
| BoEXXQFxr0oO.nqlgl  | C5        | 727       | 5.95E-05 | 0.001883761 |
| ljdHhW_V7BR.f19.5c  | STRN3     | 29966     | 5.95E-05 | 0.001883761 |
| uoUkrIJ9NKbt4XUBns  |           | NA        | 5.95E-05 | 0.001883761 |
| H10BkpQB2KRdTVQlyg  | RLTPR     | 146206    | 5.97E-05 | 0.001886526 |
| 9Elpq4KI64KLOR57lo  | IPO13     | 9670      | 5.98E-05 | 0.001887536 |
| iuKRE4_OrOqU4IX4Ik  | HNMT      | 3176      | 6.02E-05 | 0.001894777 |
| fgREO902V8nU9SCqXk  | LINC00426 | 100188949 | 6.02E-05 | 0.001894777 |
| K5fX4U3F_BwVHVJ1SU  | ABHD14A   | 25864     | 6.09E-05 | 0.001909774 |
| Error1LiUA05Q7PUt6s | SLAMF6    | 114836    | 6.09E-05 | 0.001909774 |

|                    |          |        |          |             |
|--------------------|----------|--------|----------|-------------|
| 3lXj.l8L35eLjdUI7c | FAM122A  | 116224 | 6.10E-05 | 0.001909774 |
| uCXirqqI407udqvp6A | GANAB    | 23193  | 6.11E-05 | 0.001909774 |
| 9114lx5QG10u_3kXnU | PLXNA3   | 55558  | 6.11E-05 | 0.001909774 |
| 6ShS8R1MZAWYxP_eBA | RTCA     | 8634   | 6.13E-05 | 0.001909774 |
| QingoCq3q37Vyg911c | ZNF444   | 55311  | 6.15E-05 | 0.001909774 |
| ld.ooJU8dbB4ejrUu0 | RNF14    | 9604   | 6.15E-05 | 0.001909774 |
| rUayR_F.2GfBf1ntIU | AKT1     | 207    | 6.15E-05 | 0.001909774 |
| Q1T_A_emeelo5P.i.s | MAFB     | 9935   | 6.15E-05 | 0.001909774 |
| N_jqAq5JAHiLJK77p0 | RECQL    | 5965   | 6.17E-05 | 0.001911697 |
| ErpSXo3XQtVCPRF4d4 | CD19     | 930    | 6.17E-05 | 0.001911697 |
| ELtdhNUqgJCJLiXiS4 | ZNF683   | 257101 | 6.19E-05 | 0.001914368 |
| QPukfi_7ukkk.i1ODk | MRPS25   | 64432  | 6.21E-05 | 0.001918745 |
| xqBV_4k50s0_6lFCKk | EWSR1    | 2130   | 6.24E-05 | 0.001922342 |
| 0evfS558c.6wepf36o | LMBRD1   | 55788  | 6.24E-05 | 0.001922342 |
| H7xKuF73cnuN8UfQOo | E2F3     | 1871   | 6.30E-05 | 0.001937974 |
| 9pfR5xlXpVAEiJCEvs | PPP1R3D  | 5509   | 6.31E-05 | 0.001937974 |
| HKGuKOJUz65IKJeyCQ | CLPP     | 8192   | 6.31E-05 | 0.001937974 |
| TkdK200HX.E_4Rpf6U | SUCNR1   | 56670  | 6.32E-05 | 0.001937974 |
| lxkIKI9EiiYISinh4k | AUP1     | 550    | 6.35E-05 | 0.001943977 |
| uwu9XfnnLnl6K.ppqQ | C19orf60 | 55049  | 6.36E-05 | 0.001944883 |
| rruBcXl_iKlStUDd9A | AMFR     | 267    | 6.40E-05 | 0.001953446 |
| 31PVJ_dbJ64_ghHeYQ | SNORA7B  | 677797 | 6.40E-05 | 0.001953446 |
| Bxl5JS5pCl9N6J1udM | GLI4     | 2738   | 6.46E-05 | 0.001967893 |
| WpjVO7APdPoex9upew | CCRL2    | 9034   | 6.47E-05 | 0.001967893 |
| x644q3stUjHQiniuo  | NA       | NA     | 6.47E-05 | 0.001967893 |
| NdCdaoChPoCVNiCqXl | EDF1     | 8721   | 6.52E-05 | 0.001980531 |
| r659W557456f71Q4Tk | ETFA     | 2108   | 6.58E-05 | 0.001996494 |
| cubXPI0ecP34l6z_eU | ENPP4    | 22875  | 6.60E-05 | 0.001997324 |
| HWXXhblfygk9R.snpQ | PGLS     | 25796  | 6.66E-05 | 0.002011496 |
| WnelYOc6nkjh98ij_U | IFI44    | 10561  | 6.67E-05 | 0.002011496 |
| QKpvdUCPK2.1AiWbVo | BIN1     | 274    | 6.67E-05 | 0.002011496 |
| x54gQFReJFUhF9dBUo | LST1     | 7940   | 6.69E-05 | 0.00201564  |
| lkVke6dfZHizvod5TI | NA       | NA     | 6.70E-05 | 0.002016441 |
| x617v.3lFApSrR4KXo | PTGDR2   | 11251  | 6.74E-05 | 0.002027226 |
| KKO6.1C14V_iUgulXc | B3GAT3   | 26229  | 6.76E-05 | 0.00202782  |
| 6SAI56o65Se5fp77P4 | MYO9A    | 4649   | 6.78E-05 | 0.00202782  |
| rBUoS.S45A_7ld69J4 | STAU1    | 6780   | 6.78E-05 | 0.00202782  |
| oSdVFd5dS0U7klitew | ARHGAP30 | 257106 | 6.78E-05 | 0.00202782  |
| cTi547v_kjif0nil44 | CASC4    | 113201 | 6.79E-05 | 0.00202782  |
| ii16k15rtiQyXp9Ing | B3GALT4  | 8705   | 6.82E-05 | 0.002033554 |
| NV.PI0.fuGX76oqA3s | RNF149   | 284996 | 6.84E-05 | 0.002036741 |
| oe0JlJo70KKsvlUC4  | METTl9   | 51108  | 6.84E-05 | 0.002036741 |
| rAlrkp3ntNtKHX7qe4 | SERGEF   | 26297  | 6.91E-05 | 0.002048015 |

|                    |          |        |          |             |
|--------------------|----------|--------|----------|-------------|
| ZeOr8VJxUskwf9Enao | NCBP1    | 4686   | 6.91E-05 | 0.002048015 |
| cBJNd9RnSC73r6pSk4 | ISG20L2  | 81875  | 6.92E-05 | 0.002048015 |
| Nu9eCee7Xcvi.emVeU | BIN1     | 274    | 6.93E-05 | 0.002048015 |
| 9pUFj9TDskvFu9F0Rw | TMED5    | 50999  | 6.98E-05 | 0.002048015 |
| ulPfOJQC.tPwC9P_Kg | BZW1     | 9689   | 6.98E-05 | 0.002048015 |
| WSkSSlqekVXcrIEQtM | NA       | NA     | 6.99E-05 | 0.002048015 |
| EXiktXnuReqsS9wxWM | FBX07    | 25793  | 6.99E-05 | 0.002048015 |
| Zz96VVLtJU9OECfhS0 | NA       | NA     | 6.99E-05 | 0.002048015 |
| uBJ3u7grih36CSINek | BMF      | 90427  | 6.99E-05 | 0.002048015 |
| lCOis8a9SO2dVpRih4 | DTX2     | 113878 | 6.99E-05 | 0.002048015 |
| HuTfddOp686_i_eoe0 | C3orf38  | 285237 | 7.01E-05 | 0.002048015 |
| uelcXRJ4B.AASjqUUk | NPIP     | 9284   | 7.01E-05 | 0.002048015 |
| 3heUNPKiKQQRdOl.XU | RNF13    | 11342  | 7.01E-05 | 0.002048015 |
| K6iuk9_1e_VU3cVX.s | RNF157   | 114804 | 7.01E-05 | 0.002048015 |
| Zl2IOS99FCpxSiFN0g | GCH1     | 2643   | 7.03E-05 | 0.002051983 |
| HKQdTjeFWvF_EleXpc | NA       | NA     | 7.06E-05 | 0.002057556 |
| 3jh_0u9SuzfJwBylOU | PTGES3   | 10728  | 7.08E-05 | 0.002058113 |
| Bd6V3FXjeE1UdGDPOU | CD22     | 933    | 7.09E-05 | 0.002058113 |
| 9edYSSVSgMag69KhQs | SCAF11   | 9169   | 7.09E-05 | 0.002058113 |
| iRI16UhnlnlnkUab.8 | AKT1     | 207    | 7.10E-05 | 0.002058834 |
| feoz5AGLAIRKNT31V0 | DDX59    | 83479  | 7.13E-05 | 0.002064364 |
| Q3UqkBd47ff5JSyfh4 | NA       | NA     | 7.20E-05 | 0.002082698 |
| TdRf7_R3vI7iif3pO4 | ZAK      | 51776  | 7.21E-05 | 0.002083386 |
| WSJel6Gwolgei6SrVI | USE1     | 55850  | 7.24E-05 | 0.002087949 |
| WbfQoVL541QQCtQAqU | NAMPT    | 10135  | 7.24E-05 | 0.002087949 |
| QRLqiToqOr_l7n3nz0 | TCL1B    | 9623   | 7.34E-05 | 0.002111601 |
| Q1mTUfvktQtdy5BlMk | TOR1AIP1 | 26092  | 7.34E-05 | 0.002111601 |
| Bt9OVtPqCYRgqCSdxE | TFIP11   | 24144  | 7.37E-05 | 0.002115431 |
| 9TvapRvvs7PjsSX4O4 | PDPK1    | 5170   | 7.38E-05 | 0.002117663 |
| HT64TpQ8LNLiXXN6h8 | RBM47    | 54502  | 7.39E-05 | 0.002118304 |
| WR.Yo.kubckXI8SUoE | BCLAF1   | 9774   | 7.41E-05 | 0.002122112 |
| fVJXtfhYi1JP.0vpV4 | JMJD4    | 65094  | 7.47E-05 | 0.00213541  |
| ipUX0u7gHYLn60Xg_8 | C11orf82 | 220042 | 7.48E-05 | 0.002136027 |
| Bqf4Lu558df0391WfU | RRAGA    | 10670  | 7.61E-05 | 0.002171384 |
| cWveqYA5eV9E2CP5SI | GNG11    | 2791   | 7.66E-05 | 0.002181421 |
| lIihQKLbVKddmXSug0 | SH2D3A   | 10045  | 7.68E-05 | 0.002185132 |
| ulTiKqlr53qOgQgAis | ALAS2    | 212    | 7.74E-05 | 0.002198275 |
| Beh.CTDygE9elq5Lp0 | MCHR2    | 84539  | 7.77E-05 | 0.002204061 |
| ECI56II5KVA5JIIKVI |          | 1731   | 7.77E-05 | 0.002204061 |
| 9cUWztB6sCX1IndwMU | VPS54    | 51542  | 7.80E-05 | 0.002209296 |
| luDHV5JAQiOkO.1_9U | NFE2L2   | 4780   | 7.84E-05 | 0.002213471 |
| IRLyOHIQqHevnM3TSg | SAMSN1   | 64092  | 7.84E-05 | 0.002213471 |
| 0kSSZTf1v0qvuOCICg | ATG16L1  | 55054  | 7.86E-05 | 0.002216066 |

|                     |           |        |          |             |
|---------------------|-----------|--------|----------|-------------|
| ol6H8XmzkTnSD7ccp4  | ARRDC3    | 57561  | 7.86E-05 | 0.002216066 |
| 9jpVICSOeQEnAe0z54  | CLPX      | 10845  | 7.87E-05 | 0.002216579 |
| BRIt.oJSS25XWzHtR0  | PIP4K2A   | 5305   | 7.90E-05 | 0.002220206 |
| cynKnfL.T1z5VCz7QE  | CCNG2     | 901    | 7.94E-05 | 0.002228489 |
| TuHsXMEUsDkiUI94VI  | TMEM183A  | 92703  | 7.96E-05 | 0.002233646 |
| unr.vrzugNEB1lokCo  | GID4      | 79018  | 7.99E-05 | 0.002234543 |
| WYnirz6nh.PhU03r_k  | MMADHC    | 27249  | 8.00E-05 | 0.002234543 |
| Hr.Uil7.qn9UogI4B4  | NRAS      | 4893   | 8.01E-05 | 0.002234543 |
| oGJDIOzrRerulLIZ7k  | PHF15     | 23338  | 8.01E-05 | 0.002234543 |
| onhVJ9SqHtHuhIAOkw  | SEC61A1   | 29927  | 8.01E-05 | 0.002234543 |
| ih616tFeUR_.XLv3uk  | AP5M1     | 55745  | 8.04E-05 | 0.002238596 |
| 6zEfenRKAu3ksqhUi0  | RHOC      | 389    | 8.05E-05 | 0.002238596 |
| NpeKFKCyJK5ICJ6BI   | SFI1      | 9814   | 8.07E-05 | 0.002240513 |
| 355S7.Q46EEioznsi4  | MORF4L1   | 10933  | 8.09E-05 | 0.002240513 |
| untftriFen8qSEoUb8  | NA        | NA     | 8.09E-05 | 0.002240513 |
| uCqYznniq4uTOLuleI  | MMS19     | 64210  | 8.09E-05 | 0.002240513 |
| olJK_nDnOqv.FEvlPs  | SELT      | 51714  | 8.13E-05 | 0.002248517 |
| ffgeO0kVi6deD8LeoY  | G3BP2     | 9908   | 8.15E-05 | 0.002248517 |
| 0eKp53Oe7OZd3pNyhM  | DLGAP4    | 22839  | 8.16E-05 | 0.002248517 |
| rr9X9B6_V96kW3p0CI  | FPR2      | 2358   | 8.16E-05 | 0.002248517 |
| rvRNLp.s5Aznu_hehk  | NETO2     | 81831  | 8.20E-05 | 0.002255994 |
| WK0VWK9THpRTVYiKBQ  | U2AF1L4   | 199746 | 8.21E-05 | 0.002255994 |
| 9eH3iSuKCRxeLqoVik  | NUDT22    | 84304  | 8.21E-05 | 0.002255994 |
| 9eDwAN766WpkunTI7o  | DUSP19    | 142679 | 8.27E-05 | 0.002268605 |
| ZUR9cfrd6C.xROwSPU  | ANKRD10   | 55608  | 8.33E-05 | 0.002280096 |
| x.RBDVIXdeVqHsHrUk  | LOC92249  | 92249  | 8.33E-05 | 0.002280096 |
| rF7ol3er4KJK0Q47oE  | FAM108B1  | 51104  | 8.35E-05 | 0.002282036 |
| Tv67vVkBvf7nuquesnQ | ABCC5     | 10057  | 8.36E-05 | 0.002282459 |
| feETXd.kj54epEdOUI  | UBE2A     | 7319   | 8.42E-05 | 0.002297989 |
| imS5fkxUBSuom.74k4  | CDC25B    | 994    | 8.46E-05 | 0.002298898 |
| 3uHTqYokyEu6IT6kKo  | SERPINA10 | 51156  | 8.46E-05 | 0.002298898 |
| Tf7n3Pn._7.vCTtX6U  | XPR1      | 9213   | 8.47E-05 | 0.002298898 |
| 0XfIX6GI009TW_Th7o  | SPAG9     | 9043   | 8.48E-05 | 0.002298898 |
| le_n.WiSL6IN_4FKeQ  | YME1L1    | 10730  | 8.48E-05 | 0.002298898 |
| Zv0i1ZKxVJ3n5YB6C8  | ATXN2     | 6311   | 8.48E-05 | 0.002298898 |
| oXcV9m5.t6gt.6VTtl  | CTPS2     | 56474  | 8.51E-05 | 0.002303795 |
| i1LnXep34vnn4PluyE  | UBAC1     | 10422  | 8.54E-05 | 0.002308681 |
| QQEinmvQIVERkQhWuc  | PTP4A3    | 11156  | 8.57E-05 | 0.002315051 |
| uWsCSg4QJ_f96zvcrs  | RTN4      | 57142  | 8.58E-05 | 0.002315432 |
| in0kKUf4o44VY6ffKc  | SAMD1     | 90378  | 8.68E-05 | 0.002339686 |
| BaBR6TSOuC4ecVr5Tc  | ZC3H7A    | 29066  | 8.70E-05 | 0.002341528 |
| ilVPHu6V6k10v10.rA  | PTCD2     | 79810  | 8.73E-05 | 0.002346344 |
| ZrJe5N64u7Rif7x5QE  | ANXA11    | 311    | 8.74E-05 | 0.002346688 |

|                    |          |        |          |             |
|--------------------|----------|--------|----------|-------------|
| NJXqhfuaXkoFKjFN60 | MUS81    | 80198  | 8.77E-05 | 0.002352973 |
| T4a1loAqWo24WomGmg | SNRNP70  | 6625   | 8.79E-05 | 0.0023535   |
| Q154l9Rd4XdHvTloXs | C17orf49 | 124944 | 8.81E-05 | 0.0023535   |
| 6uqJAXp_Ok.7SACF7s | AKAP11   | 11215  | 8.83E-05 | 0.0023535   |
| HpVLOeA136dFeOdQ7U | MORF4L2  | 9643   | 8.83E-05 | 0.0023535   |
| opk7ew1Scew3ScdqKc | PCYOX1   | 51449  | 8.83E-05 | 0.0023535   |
| fehMkkTHH0i9OOyO3o | ADAM10   | 102    | 8.83E-05 | 0.0023535   |
| uXVfUdJHNSkooUAqHQ | TMCO6    | 55374  | 8.89E-05 | 0.002365429 |
| iuVmMp93r.t.nvXpJk | C22orf29 | 79680  | 8.91E-05 | 0.002365429 |
| EJ6eR9VUmxKKJGpJ58 | DHX30    | 22907  | 8.93E-05 | 0.002365429 |
| f.NCAKuqORNZICKCSg | NA       | NA     | 8.93E-05 | 0.002365429 |
| HlO0WJVPj1SKt8tegl | MYOF     | 26509  | 8.93E-05 | 0.002365429 |
| 3kE50kon00GMztI3Ao | EMB      | 133418 | 8.95E-05 | 0.002367843 |
| B.b7spY3l7SLUbtetE | TEX2     | 55852  | 8.97E-05 | 0.002367843 |
| ohXh5y94oR66e5zu6U | CLSTN1   | 22883  | 8.97E-05 | 0.002367843 |
| xLpHYyAohzlLxxSpc4 | SKAP1    | 8631   | 9.00E-05 | 0.002374    |
| fCn13KlFKeKHZUoToc | ABCF3    | 55324  | 9.01E-05 | 0.002374307 |
| uVoZUoVTpLqADsoh78 | LTB      | 4050   | 9.10E-05 | 0.002393849 |
| oH9C59uh594eZZe4Vk | NA       | NA     | 9.10E-05 | 0.002393849 |
| ErmjLeHL8KlelgneVA | BTF3     | 689    | 9.14E-05 | 0.002395264 |
| 0Je9NYkuakxBriB6IE | CRTAP    | 10491  | 9.14E-05 | 0.002395264 |
| u7lnpOKlu1Ue4KOCJA | MED15    | 51586  | 9.15E-05 | 0.002395264 |
| onSIC.429TEsX783n0 | RAD23B   | 5887   | 9.16E-05 | 0.002395264 |
| ZuSTf1wfvuvVq6SuRI | RIMS3    | 9783   | 9.16E-05 | 0.002395264 |
| x9JYg60gl0sQVTo8p4 | MAN1A1   | 4121   | 9.18E-05 | 0.002396338 |
| cnXqKSRSAqR4Dscno4 | SNRNP200 | 23020  | 9.19E-05 | 0.002396338 |
| fiBrp1RKENnIVQXbJA | PPP1R14B | 26472  | 9.20E-05 | 0.002396338 |
| xtFfkxwpikjEXu91QU | ZNF416   | 55659  | 9.22E-05 | 0.002396338 |
| okS1StUnVd86.e0w7k | SCRN1    | 9805   | 9.22E-05 | 0.002396338 |
| W8tpJ0Dv6i5CA8pFUo | N4BP2L1  | 90634  | 9.23E-05 | 0.002396338 |
| Wr.kU13xpciL4Qvn7l | GABPA    | 2551   | 9.25E-05 | 0.002396338 |
| N_4lBFfv61f_oSlrHU | DCTN4    | 51164  | 9.25E-05 | 0.002396338 |
| ZAxQr1bwQPgl3n56A4 | SLC16A6  | 9120   | 9.25E-05 | 0.002396338 |
| cVe.FY7OgMClf9deAA | TIAF1    | 9220   | 9.30E-05 | 0.002406642 |
| 0eqkpnufe4rr8n.n9g | CBX7     | 23492  | 9.34E-05 | 0.002412632 |
| uFUIcpAtpqZ6CylpSA | TNNT3    | 7140   | 9.35E-05 | 0.002412891 |
| 0Xn_ie7DpJgE7J7f70 | KANSL1   | 284058 | 9.46E-05 | 0.00244028  |
| Bioe2e40i6vCeFKBFQ | TCF20    | 6942   | 9.52E-05 | 0.002453346 |
| QJ95QP09dAX9KKrr6Y | COL8A2   | 1296   | 9.56E-05 | 0.002460684 |
| 6ezwApA2ClqZrh0Ze0 | TDP1     | 55775  | 9.59E-05 | 0.002465161 |
| WfrLtJqRf8RfcsnQnl | FAM104A  | 84923  | 9.66E-05 | 0.002478345 |
| 6pd51515eTvd3vv04  | ARF5     | 381    | 9.66E-05 | 0.002478345 |
| EQOC09zUkl17Uls7o  | CNIH     | 10175  | 9.69E-05 | 0.002481553 |

|                     |           |        |             |             |
|---------------------|-----------|--------|-------------|-------------|
| f2eKp70UU1291KtCgs  | TIMM22    | 29928  | 9.70E-05    | 0.002481553 |
| xC7IP4U3aguKIIVPoU  | CSNK1E    | 1454   | 9.72E-05    | 0.002482101 |
| OoKJHoccttHFF.o9KnU | ACAP2     | 23527  | 9.73E-05    | 0.002482101 |
| itMl84vJ.fnJVctrRQ  | BPGM      | 669    | 9.73E-05    | 0.002482101 |
| Ex1lL6FRRJeRHoffp8  | DHRS9     | 10170  | 9.77E-05    | 0.002489339 |
| T3uWaAWO6CFWK6Lung  | ATRIP     | 84126  | 9.81E-05    | 0.002496561 |
| u1dXxVTXwf7NenzBku  | ADIPOR1   | 51094  | 9.87E-05    | 0.002509401 |
| oeaOeSC7oU6ahVChH4  | SNAP47    | 116841 | 9.92E-05    | 0.002511709 |
| c1CkS4nqSJ6nllJf.Q  | POU2F1    | 5451   | 9.92E-05    | 0.002511709 |
| 960K2Qn564AoVRgu_g  | HPRT1     | 3251   | 9.92E-05    | 0.002511709 |
| NedfU3l4VfRzhxEg3U  | F8        | 2157   | 9.92E-05    | 0.002511709 |
| ok_Dr7ykIO50EeP0Xc  | ATAD1     | 84896  | 9.94E-05    | 0.002511709 |
| EDeKenySidSVuezSew  | AP3S1     | 1176   | 9.94E-05    | 0.002511709 |
| 65HEaoJ6COoSL_Ekl4  | FKBP2     | 2286   | 9.95E-05    | 0.002511858 |
| xxV4ehFEnyXbUVwOx0  | SLC37A3   | 84255  | 0.000100011 | 0.002521781 |
| B51LO5KE6lCCE759V8  | CCNC      | 892    | 0.000100509 | 0.002531683 |
| NhbblXTQoIlChVCiCA  | LOC283663 | 283663 | 0.00010062  | 0.002531811 |
| l3roFeVfFjfpJqDes   | POU2F2    | 5452   | 0.000100731 | 0.002531938 |
| oH1xR55OLMOdaDzSAk  | TMEM184C  | 55751  | 0.000101119 | 0.002535063 |
| rr3l9SziziUV5G1d7k  | ACD       | 65057  | 0.000101396 | 0.002535063 |
| fs05Kte43JSISU8Fy4  | MTHFD2    | 10797  | 0.000101396 | 0.002535063 |
| r4oXvVYpQkgGn5Qt1l  | PPAN      | 56342  | 0.000101728 | 0.002535063 |
| 95TfnP9P9Xugjk6_TU  | IMPAD1    | 54928  | 0.000101728 | 0.002535063 |
| l1_cHnkq6L_N6SFY10  | POMT1     | 10585  | 0.000101894 | 0.002535063 |
| oqluBEgV0lQo4SJ6KE  | L3MBTL2   | 83746  | 0.000102005 | 0.002535063 |
| BkUex1lejBJCU3.AA   | ZFP42     | 132625 | 0.00010206  | 0.002535063 |
| OS0pqfIO97g3YurIE   | VPS37B    | 79720  | 0.00010206  | 0.002535063 |
| fkk3XtVSU7T3J7gekY  | KLF12     | 11278  | 0.00010206  | 0.002535063 |
| BQjgJu6lLtI6S6CTu4  | UBE2V2    | 7336   | 0.00010206  | 0.002535063 |
| NE_8qgdKcu0m36.qiA  | FAM102A   | 399665 | 0.000102282 | 0.002535063 |
| 6kq6kulnnOg0OhAeEo  | FAM120AOS | 158293 | 0.000102282 | 0.002535063 |
| Qn_78f.p6JojjqUVbk  | MTA1      | 9112   | 0.000102337 | 0.002535063 |
| 6V1UodUc_Xe4_lSigA  | LMF2      | 91289  | 0.00010278  | 0.002542151 |
| KtlkuUXXt0vfSln1FI  | THADA     | 63892  | 0.000102835 | 0.002542151 |
| 0lBWlQnlSRlrgoIS5s  | NFKB2     | 4791   | 0.000103112 | 0.002546368 |
| Tekn1551e0iOCRA10o  | MBD3      | 53615  | 0.000103666 | 0.002550892 |
| WrkH_LX6fhzEpfgfTo  | AZIN1     | 51582  | 0.000103666 | 0.002550892 |
| 35HOZRFI4KO5V48l6U  | TTC17     | 55761  | 0.000103666 | 0.002550892 |
| HyF0nVYkmSupSoKloU  | ME3       | 10873  | 0.000103721 | 0.002550892 |
| 9kXkikp9InUUINDIKc  | TCTN1     | 79600  | 0.00010433  | 0.002563242 |
| c1Le0V1.XnVMRUKfv0  | VPS52     | 6293   | 0.000104884 | 0.002574207 |
| 0sNckf_2XqYRfCne3Q  | PPM1B     | 5495   | 0.000105106 | 0.002577003 |
| QJ3oX9Vd1eaX_0XHUM  | HDHD3     | 81932  | 0.000105992 | 0.002594773 |

|                     |          |        |             |             |
|---------------------|----------|--------|-------------|-------------|
| Be9VJB3pdQDqIAZS7s  | NCOA2    | 10499  | 0.000106047 | 0.002594773 |
| 65IRFMIV9xx.V3ZXIE  | TP53INP2 | 58476  | 0.000106435 | 0.002596302 |
| WpwMtCqwzqXvvy7dfU  | MPZL2    | 10205  | 0.000106435 | 0.002596302 |
| Tfe_XUhdrIRJfijX1A  | BCAS4    | 55653  | 0.000106435 | 0.002596302 |
| QdVYfl4NA.UisLrgKU  | NA       | NA     | 0.000106546 | 0.002596359 |
| NR0ileNRExAehIaXXk  | PCED1A   | 64773  | 0.000106933 | 0.002603157 |
| o1UcwS_eWWgsSFIJV4  | SCNM1    | 79005  | 0.000107598 | 0.002616675 |
| WFnonXE65HoIFL2FHE  | ACHE     | 43     | 0.000108041 | 0.002623469 |
| lieP42KJmvFoanq3Os  | CCNC     | 892    | 0.000108096 | 0.002623469 |
| oUXkAnD7ul6_oqnP.o  | ACTR10   | 55860  | 0.000108207 | 0.002623499 |
| 3IS.rqV9.Xof7oopFA  | CD2BP2   | 10421  | 0.000108705 | 0.002627655 |
| Qk_6e0DU7tVXut7u4Q  | SLC25A1  | 6576   | 0.000108761 | 0.002627655 |
| cB9cSqUAUiAp9SQfY4  | FAM45A   | 404636 | 0.000108761 | 0.002627655 |
| leoekq6eJp7fl37T7c  | THOP1    | 7064   | 0.000108871 | 0.002627655 |
| Tre_tTul6.XJFTwEw4  | C11orf58 | 10944  | 0.000108927 | 0.002627655 |
| 0Aul6ne_u5u9bpoiCA  | H2AFY2   | 55506  | 0.000109259 | 0.002633019 |
| QKXwn_hUKgB5OiGT9o  | LMO2     | 4005   | 0.00010937  | 0.002633039 |
| InLZMVosEXIINNDeel  | MTO1     | 25821  | 0.000109591 | 0.002635723 |
| cXX73AliuqPr060Ef0  | NA       | NA     | 0.000110533 | 0.002655698 |
| BJuaJN4L5Lfm7o65JQ  | S1PR4    | 8698   | 0.000110865 | 0.002661012 |
| K.7XdJ5USUgJShRWB4  | CASZ1    | 54897  | 0.00011164  | 0.002676914 |
| icVXI8iRfUiCc9St0E  | DFFA     | 1676   | 0.000111751 | 0.002676914 |
| xbBQIGESlJQQKJRWko  | ARL6IP4  | 51329  | 0.000112914 | 0.002696637 |
| TpXgiioh3nnMHijils  | PHKG2    | 5261   | 0.000112969 | 0.002696637 |
| 3IUB0U1dLXVQsrHKKHk | CNPY3    | 10695  | 0.000112969 | 0.002696637 |
| HiTqPjaSQiwIRJ1lpU  | MRPL38   | 64978  | 0.000113025 | 0.002696637 |
| Bhe.RS7.Ffh5V9znn0  | OGT      | 8473   | 0.000113468 | 0.002704514 |
| HeFF4QnlGqB5J.54Mk  | TMEM192  | 201931 | 0.000113855 | 0.002711055 |
| ZSON7dKLvg7uVZ57eo  | ZNF212   | 7988   | 0.000114021 | 0.002712315 |
| fdUUJSEb7A559c_iVI  | SLCO4C1  | 353189 | 0.000114243 | 0.002714888 |
| ZNSinERSQFuCiDqEeo  | CNPY4    | 245812 | 0.000114963 | 0.002726514 |
| OpYPku3U0kv53U6kRg  | SNORD89  | 692205 | 0.000115018 | 0.002726514 |
| 94fcfx6eLuJZTI6Uw0  | PNRC1    | 10957  | 0.000115074 | 0.002726514 |
| Qnd1TULhSOVx0n1NFU  | GPR162   | 27239  | 0.000116181 | 0.002745919 |
| KvR4cynHkkeq7S tU   | NA       | NA     | 0.000116181 | 0.002745919 |
| ZU6KCne9RMz9R99Pd0  | PGK1     | 5230   | 0.000116237 | 0.002745919 |
| ER5VeeU7oEUQvih9_c  | SPG7     | 6687   | 0.000116458 | 0.002748442 |
| 3xPV70i6rKr.WW8VjU  | BZRAP1   | 9256   | 0.000116624 | 0.002749369 |
| xKJf1Lzfi_Sd7L9_KU  | NCOA4    | 8031   | 0.000116901 | 0.002749369 |
| ZnvrkKiOt0LSKgiGY   | ARHGAP10 | 79658  | 0.000116901 | 0.002749369 |
| corenSnS.3RPrk3fTk  | TM6SF1   | 53346  | 0.000116956 | 0.002749369 |
| BrKBTL7tcx_CKegLJU  | CHORDC1  | 26973  | 0.000117621 | 0.002762279 |
| 34R05QQgXuVdfXBeKU  | CD72     | 971    | 0.000117787 | 0.002763472 |



|                    |          |        |             |             |
|--------------------|----------|--------|-------------|-------------|
| HoNRWCLpzAbWZdT5nc | SNHG9    | 735301 | 0.000118119 | 0.002764335 |
| WVHrohnz3HoWnnsX0o | RRNAD1   | 51093  | 0.000118119 | 0.002764335 |
| W7KviUSEnfSVLJLoko | ZNF76    | 7629   | 0.000118175 | 0.002764335 |
| lklcgLCVKn0jcLy1Al | MEGF9    | 1955   | 0.000118286 | 0.002764335 |
| HI7XSGoK.iCrSOspqU | CCDC97   | 90324  | 0.000119005 | 0.002778326 |
| f9L0zkgbPyU8VG4RRY | ACVR1    | 90     | 0.000119116 | 0.002778326 |
| TsC0k4kAHUB13UUmUI | UBE2E1   | 7324   | 0.000119559 | 0.002785947 |
| Zq5_n_v9KtwbJ7XSVI | CRLF3    | 51379  | 0.000119725 | 0.002787107 |
| 6n5.13qRFP_NPBSLF0 | TMEM167A | 153339 | 0.000120224 | 0.002794292 |
| WplADoapJ9EKQt9Odo | RHEB     | 6009   | 0.00012039  | 0.002794292 |
| NMjSq6eeinueqN4r_s | TSPAN18  | 90139  | 0.00012039  | 0.002794292 |
| xS36VUX9W7mN3ono4c | AGAP6    | 414189 | 0.000120501 | 0.002794292 |
| xE.DEku00gjB_JfOk  | CAT      | 847    | 0.000121276 | 0.002809551 |
| WUfp4lqZaYgppInlek | C2orf88  | 84281  | 0.000121497 | 0.002811963 |
| Qv3f44UoIDVJFUIEp4 | RNF166   | 115992 | 0.000122716 | 0.002837418 |
| 621OUC7mlfXhNFet4k | KCTD13   | 253980 | 0.000123103 | 0.002843636 |
| xRXl11eef5PR9fpSLQ | SLC22A17 | 51310  | 0.000123436 | 0.002848376 |
| WBSiedHF10qOlvpRt8 | TAZ      | 6901   | 0.000123546 | 0.002848376 |
| r3ovwUjXVRVZ1dMtxU | SIT1     | 27240  | 0.000124211 | 0.002860943 |
| H55X9ekqeui31dAk5c | C3orf37  | 56941  | 0.000124543 | 0.00286584  |
| QKV00jqdXjfoddJf6E | YAF2     | 10138  | 0.000125097 | 0.002872853 |
| 3sNJ_y456UDrnSSul  | TOMM20   | 9804   | 0.000125208 | 0.002872853 |
| W5HXoRBSSdeU6ErrF4 | FXVD2    | 486    | 0.000125208 | 0.002872853 |
| Bhl.vTIV3QuV3WJ6yk | TAZ      | 6901   | 0.00012554  | 0.00287349  |
| xiBIDLpPk5Uki2pXxU | CCDC90A  | 63933  | 0.000125595 | 0.00287349  |
| ZEiOXHSiuS0F3FG5ql | PSMB5    | 5693   | 0.000125595 | 0.00287349  |
| xlk7hXgUneFSggh1FU | PYROXD2  | 84795  | 0.000125817 | 0.002875811 |
| 9kNH7l6i9yHJepiH00 | POLR1B   | 84172  | 0.00012626  | 0.002883186 |
| EOSjqN7rQKEpiie6mQ | ZMYM3    | 9203   | 0.000126426 | 0.00288423  |
| rARVkpAjkVeeOIJfec | C17orf59 | 54785  | 0.000126592 | 0.002885272 |
| fiqSi1SRTa9Mu5_7v4 | HDAC5    | 10014  | 0.000126814 | 0.002887573 |
| KleUdXpeV7.6tBPnGg | KLHL26   | 55295  | 0.000127146 | 0.00289239  |
| fp5J9j5Qz7AC9361L4 | TCP1     | 6950   | 0.000127589 | 0.002898223 |
| c6Oipeigiq3yKPR07U | HCG26    | 352961 | 0.000127644 | 0.002898223 |
| NtNS1EorriizdUv1TE | HERC4    | 26091  | 0.000128198 | 0.00290804  |
| Kwgz0QT4FSimifkuJY | ZNF652   | 22834  | 0.000128918 | 0.002921603 |
| 01STVdFQEdfXpc3aHg | ZNF827   | 152485 | 0.000129472 | 0.00293138  |
| ipCh4d1Cr.vfp.oRel | FAM110A  | 83541  | 0.00013069  | 0.002956169 |
| Nb_wOsga6ce4uqJfK  | TBK1     | 29110  | 0.000130912 | 0.002958386 |
| Hvun37sCEoHuge477c | FGF13    | 2258   | 0.000131133 | 0.002960599 |
| 6kUIH1PcNyJ4Uv4nj0 | MSMO1    | 6307   | 0.000131798 | 0.002970409 |
| 0pxdKtFFTs_p8tKPhl | CMTM6    | 54918  | 0.000132074 | 0.002970409 |
| Np7AOPeVXRd8VSxz0  | UBXN4    | 23190  | 0.000132074 | 0.002970409 |

|                    |          |        |             |             |
|--------------------|----------|--------|-------------|-------------|
| ilOip4XW.eqDunie6w | BET1L    | 51272  | 0.000132517 | 0.002970409 |
| NV9D10LerrhCsqnKx4 | FAM20B   | 9917   | 0.000132573 | 0.002970409 |
| IXJ52op4pKIN398PpQ | SLC25A51 | 92014  | 0.000132573 | 0.002970409 |
| NqsVOy_yos30cOQRSE | MMADHC   | 27249  | 0.000132573 | 0.002970409 |
| ZnOgng5aGckS.H.1f0 | VBP1     | 7411   | 0.000132628 | 0.002970409 |
| W30m030LGK1SWLimeQ | PANK4    | 55229  | 0.000132684 | 0.002970409 |
| B_01.ieeHIDBPfy3eo | JAK2     | 3717   | 0.000133293 | 0.00298126  |
| 3klEfegqluj_nqXejo | GNLY     | 10578  | 0.000133791 | 0.002989302 |
| BVIKgj7FL5wXt_.SiU | KCTD3    | 51133  | 0.000133902 | 0.002989302 |
| EqRaeX9VKg13UjfBQg | BPI      | 671    | 0.000134677 | 0.003003811 |
| rSVnok4ne7sWIHquO8 | PRNP     | 5621   | 0.00013584  | 0.00302693  |
| K76SYRTVMSnfF33Xio | SP140    | 11262  | 0.000136117 | 0.003030281 |
| TT5Jb0WhFkUhXQBU1A | C5orf20  | 140947 | 0.000136615 | 0.003036608 |
| NkY97h7.3e.Rvb4uwk | ETNK1    | 55500  | 0.000136781 | 0.003036608 |
| Iroiagq351wu_ee6f8 | CYBASC3  | 220002 | 0.000136781 | 0.003036608 |
| H5V3t54KF75597f9FU | COPS7B   | 64708  | 0.000137003 | 0.00303871  |
| 05Fewg6HwCx56EpO7k | WAC      | 51322  | 0.000137446 | 0.003045716 |
| 33KnLHy.RFaieogAF4 | H1FO     | 3005   | 0.000137723 | 0.003049031 |
| Wh36lF3vHx7HOgnXrg | PROSER1  | 80209  | 0.000138166 | 0.003056014 |
| lf1UL5z7CLPeebujks | C6orf62  | 81688  | 0.000138498 | 0.003060537 |
| HqUDUrvQEs03rPrdKU | NA       | NA     | 0.000138664 | 0.003061008 |
| Bl6nzepfdHSod34Z4c | TMEM63A  | 9725   | 0.000138775 | 0.003061008 |
| HKUvV1KJDhLzf2ifwo | CRYZL1   | 9946   | 0.000139052 | 0.003064294 |
| x4oS9loo9lYu2ebi6U | LTBP3    | 4054   | 0.000139329 | 0.003067574 |
| lSjST5euQmvSrlLogg | TOP1MT   | 116447 | 0.00013955  | 0.003069629 |
| Et61PE22bedK3o4wRk | TMEM147  | 10430  | 0.000140215 | 0.003079547 |
| El8d6CaYliklflfhA  | THAP7    | 80764  | 0.000140492 | 0.003079547 |
| HXIUBYwuThoEModVkk | PTGDS    | 5730   | 0.000140492 | 0.003079547 |
| B_VRVlJzJGmS9cz07w | P4HTM    | 54681  | 0.000140658 | 0.003079547 |
| ZerORAhTgh81C5OFo8 | RBMS1    | 5937   | 0.000140713 | 0.003079547 |
| HTg6PerojlXhX4QNzY | APOL6    | 80830  | 0.000141101 | 0.003079547 |
| 018jRX7Du8atT.16DY | SMEK2    | 57223  | 0.000141101 | 0.003079547 |
| OTt6F0lzNelcLoLqAl | FPR3     | 2359   | 0.000141267 | 0.003079547 |
| uPVHV_v9l5Um_e.m6l | TMEM184B | 25829  | 0.000141267 | 0.003079547 |
| WeHeDzQgTFxfiVnlN0 | AGTPBP1  | 23287  | 0.000141433 | 0.003079547 |
| 9V6Rerq.iehIJ8iEck | MTFP1    | 51537  | 0.000141489 | 0.003079547 |
| uN5fwonxDtlq5rp0Zc | CEP19    | 84984  | 0.000141544 | 0.003079547 |
| uRI_S4fdt6i6keLXdI | CYB561D1 | 284613 | 0.000141765 | 0.003081179 |
| TwlKEILkDI3_CQ9Kco | NHLRC3   | 387921 | 0.000141876 | 0.003081179 |
| ZiEgj4Jf5SU9.V._fU | DLEU1    | 10301  | 0.000142042 | 0.003081992 |
| oqR69EiVEnU6yi0N5Q | NA       | NA     | 0.000142541 | 0.003084035 |
| flwT9_CnqKoKKl6SOk | AMOTL2   | 51421  | 0.000142541 | 0.003084035 |
| B6qKIV_gC13fVJ1494 | NUP210   | 23225  | 0.000142651 | 0.003084035 |

|                    |          |        |             |             |
|--------------------|----------|--------|-------------|-------------|
| crXS4uReVLfgX1JTSA | CYTH2    | 9266   | 0.000142651 | 0.003084035 |
| 6KhTnqXeZd7EFHnWB0 | SLC22A18 | 5002   | 0.000143316 | 0.003095608 |
| rbUpTus.aNJUq9Uv7Y | ALDH16A1 | 126133 | 0.000143648 | 0.003097199 |
| Onq.nRd4Z4eYD4guol | CTNNAL1  | 8727   | 0.000143648 | 0.003097199 |
| HkE1w_nS5G.pDLlJe0 | UCHL5    | 51377  | 0.00014387  | 0.003098785 |
| Ep0RUw1QR.p0kj5_BU | POLR1B   | 84172  | 0.000143981 | 0.003098785 |
| EkiF5PEiQJ6iBYodFU | NR2C2AP  | 126382 | 0.000144257 | 0.003101555 |
| 90QuUcWU6l0c3XV33U | ARF4     | 378    | 0.000144368 | 0.003101555 |
| T_opYpL6PH4pSi9OFY | ANKRD44  | 91526  | 0.000144811 | 0.003108285 |
| xX1JAXgG4ql6PDuLBI | CNOT8    | 9337   | 0.000144977 | 0.003109065 |
| QmTSVoSrcTQc8YTgZo | MIF      | 4282   | 0.00014614  | 0.003120387 |
| 6i3R7UVfZ7Ug9VJ o  | GSTO2    | 119391 | 0.000146196 | 0.003120387 |
| ud1ShU0Ze5LpVRICHg | ITGAL    | 3683   | 0.000146251 | 0.003120387 |
| iSunS9eCmnhzqtNCE  | TAGLN    | 6876   | 0.000146306 | 0.003120387 |
| 3B_az9jnQKwWmnedQU | NA       | NA     | 0.000146306 | 0.003120387 |
| 9UweiAgnU_FglEqSto | PIK3C2B  | 5287   | 0.000146362 | 0.003120387 |
| HXl0t5.dx7ejw8pJec | DCK      | 1633   | 0.000146417 | 0.003120387 |
| KzhYQpF167cHVUCEOI | CAMK2N1  | 55450  | 0.000146805 | 0.003125867 |
| ivtSU0U01N1L.U31Q  | OGFOD1   | 55239  | 0.000147137 | 0.003130159 |
| B4BC0Fgn_65KJ4q5VI | NA       | NA     | 0.000147303 | 0.003130913 |
| Zm9BHuvogCrvdd0rqQ | NA       | NA     | 0.000147912 | 0.003141073 |
| lggqlpfQklmGQjpJRQ | UBE2V1   | 7335   | 0.000148355 | 0.003147691 |
| EpBlouKLnnsjhBdT3M | SAT1     | 6303   | 0.000148743 | 0.003153122 |
| 6KD030txSVWe7aMRHY | CTSL1    | 1514   | 0.000148964 | 0.003155026 |
| TKeSE_i_Y6llesSO.k | ATP2C1   | 27032  | 0.000149241 | 0.003158098 |
| H4vv_iwzVEHqsoJ0oc | CNOT8    | 9337   | 0.00014985  | 0.003168189 |
| 0oPYIX6crrifolnqf4 | TSR2     | 90121  | 0.000150017 | 0.003168905 |
| IEhXqXkfSh7q5Xq4Eg | CPSF3L   | 54973  | 0.000150293 | 0.003171957 |
| BcA1sloK4QYA0FtOEA | NA       | NA     | 0.000150792 | 0.003178287 |
| QVKfN6B16nQioo0T_E | BEND2    | 139105 | 0.000151124 | 0.003178287 |
| 9jjkvez8_57t61wuiU | ATP6V1A  | 523    | 0.000151124 | 0.003178287 |
| oX8UYx616.qqPeAXQE | MEMO1    | 51072  | 0.000151124 | 0.003178287 |
| 6rp_u9OuiH69.GSJKc | DNAJC30  | 84277  | 0.000151623 | 0.003185971 |
| 94tHob6Sovp7iPsrnQ | DNAJC30  | 84277  | 0.000151899 | 0.003188054 |
| ou.dPsAp5Z6ukglCIU | MEF2C    | 4208   | 0.00015201  | 0.003188054 |
| xvHfVEL1fc35XJ7neU | SLC35B2  | 347734 | 0.000152121 | 0.003188054 |
| TCZCVZ9wtFGa96ApH4 | WBSCR22  | 114049 | 0.000152342 | 0.003189906 |
| 6k.S0e_h9O1UFyfrio | ZNF207   | 7756   | 0.000152841 | 0.003197546 |
| x57ezV_iwgrLpOrou4 | CALM1    | 801    | 0.00015345  | 0.003207489 |
| ryQLhlipelnUsIFk3o | CXCR4    | 7852   | 0.000154004 | 0.003212968 |
| BOSQCzFuONh1goKSOU | DNAJB14  | 79982  | 0.000154004 | 0.003212968 |
| Zdex6UWWe0ftE_L07U | HIC2     | 23119  | 0.000154115 | 0.003212968 |
| cur8tN2gtsqSc6AUeo | ZNF500   | 26048  | 0.000155056 | 0.003229784 |

|                    |           |           |             |             |
|--------------------|-----------|-----------|-------------|-------------|
| TwnfXlW9J9HVf0m14  | DCTN1     | 1639      | 0.000155776 | 0.003240297 |
| fihegZuipMGqASOi18 | KIF22     | 3835      | 0.000155831 | 0.003240297 |
| ZSX01PB3HKiVEIFP1E | S1PR3     | 1903      | 0.000156274 | 0.003241708 |
| fSqi4B_noSNNdHS9Xo | ZSWIM8    | 23053     | 0.000156274 | 0.003241708 |
| 3gvtF1cSdVEov5Uo7o | TRIM28    | 10155     | 0.00015633  | 0.003241708 |
| NTupe8t9gn1I6.u.4o | RAB11FIP2 | 22841     | 0.00015644  | 0.003241708 |
| osUOrmeQ1ISw95AeX4 | SRGN      | 5552      | 0.000156773 | 0.003243109 |
| 993IVFVpX_h_bbeMc  | ZNF362    | 149076    | 0.00015705  | 0.003243109 |
| 9DBuuYqk3qb_ErXV3k | PAR6A     | 50855     | 0.00015705  | 0.003243109 |
| r0u3DRKFP3itRO6d10 | TMEM170B  | 100113407 | 0.00015705  | 0.003243109 |
| KSffqL56n0u3e6.RSc | PCMTD2    | 55251     | 0.000157825 | 0.003253509 |
| lUpFHJenQM9VKiHnu4 | SORBS3    | 10174     | 0.000157825 | 0.003253509 |
| ZS6nVH7mjuRP1z_X8k | ACSL6     | 23305     | 0.000157991 | 0.003254133 |
| l4pUCR_fe13jJ79A7k | NOV       | 4856      | 0.000158268 | 0.003257036 |
| xntytbWu7SP9dI8juU | EPB41L3   | 23136     | 0.000159154 | 0.003269652 |
| xJag_eq.l5H.3.iLCo | NAA30     | 122830    | 0.000159154 | 0.003269652 |
| ik1KD3pEn6kOy4hVN4 | NA        | NA        | 0.000159929 | 0.003282764 |
| QhzarkF6eqaookqXo  | NA        | NA        | 0.000160261 | 0.003286767 |
| fUhCMoCqAVSAbnfTe0 | ZNF398    | 57541     | 0.000160704 | 0.003290219 |
| rfCEut0F_nkT6DRoyo | PCYOX1    | 51449     | 0.000160704 | 0.003290219 |
| BJU9e6aieSikUe0elA | NA        | NA        | 0.000160981 | 0.003293073 |
| EEDSXRsf9oEkiESKk  | IFIT3     | 3437      | 0.000161369 | 0.003298186 |
| 9K1HmGXJW1XTn6j_Sc | NIN       | 51199     | 0.000162033 | 0.003308945 |
| 030gFNy0038x3F595A | AP5M1     | 55745     | 0.000162698 | 0.003315732 |
| 6IF5USVHqOOKE0I754 | TBC1D22A  | 25771     | 0.000162809 | 0.003315732 |
| ip6S3_2_9PeqMCqByk | BTBD3     | 22903     | 0.000162809 | 0.003315732 |
| NqLddw50j9Uy_n.ns  | CYB561    | 1534      | 0.000162919 | 0.003315732 |
| ZVeFV6nhQDuf3HuLVw | HYOU1     | 10525     | 0.000163252 | 0.003318544 |
| rd55ckP1N8IEfdX0qk | TMEM80    | 283232    | 0.000163362 | 0.003318544 |
| oSteS3p4lefr7dRESc | ZAP70     | 7535      | 0.000163473 | 0.003318544 |
| xFdIknPkkVkpdt9deQ | BRMS1     | 25855     | 0.000163972 | 0.003325259 |
| 3NLo9Vu7e4eSXI6pIM | CLDND2    | 125875    | 0.000164249 | 0.003325259 |
| lkWrpl73OS7r0L9.hY | PALLD     | 23022     | 0.000164359 | 0.003325259 |
| ZdXdeoXX5dK6u9AB7k | ZNF446    | 55663     | 0.000164359 | 0.003325259 |
| HleenuNxdBNSuuehQ  | NA        | NA        | 0.000164858 | 0.00332803  |
| fhJC1FcH7xEkTFEr3o | DCAF12    | 25853     | 0.000164913 | 0.00332803  |
| TIEVMDX7u8H3J5eqek | PEF1      | 553115    | 0.000164913 | 0.00332803  |
| 6nDfSVsUAluiXf5HE  | PIK3C2A   | 5286      | 0.000165411 | 0.003335278 |
| uA4QImLpJ5DoAVQfGo | FAM96A    | 84191     | 0.000165799 | 0.003340283 |
| u5NO51xXncWf96tEik | FCGBP     | 8857      | 0.000166907 | 0.00335977  |
| W4IPVNT6IX3BVIO4XU | DVL2      | 1856      | 0.00016746  | 0.003364422 |
| 3giUKCIB9JKYyQ5EIA | VPS37A    | 137492    | 0.000167516 | 0.003364422 |
| lIKRK_UlRhGASigHS4 | FAM160B2  | 64760     | 0.000167682 | 0.003364422 |

|                     |          |           |             |             |
|---------------------|----------|-----------|-------------|-------------|
| NiSbvSojRjdd5TdTXQ  | SNX29P2  | 440352    | 0.000167959 | 0.003364422 |
| uXI5Q6V4NSfk8fL0k0  | METTL21D | 79609     | 0.00016818  | 0.003364422 |
| 3noAKFeCBUf_LH5Ik   | FYN      | 2534      | 0.000168236 | 0.003364422 |
| 6Ve7k.EMCHUGioI764  | LCLAT1   | 253558    | 0.000168291 | 0.003364422 |
| Bo6vH5UUgElctUHX5s  | NA       | NA        | 0.000168346 | 0.003364422 |
| KUoHei9NIvOuWD7f64  | BIRC2    | 329       | 0.000168402 | 0.003364422 |
| 3Lu6ZrTWHPtFREgkuc  | VPS39    | 23339     | 0.000168734 | 0.003368251 |
| xSdcarRdBYtcQohHkQ  | RBM10    | 8241      | 0.000169454 | 0.003376392 |
| WK46O.11r3Sp1F39qU  | CHPF2    | 54480     | 0.000169509 | 0.003376392 |
| Q6glFSt09dXnvopBN0  | TRAPPC3  | 27095     | 0.000169565 | 0.003376392 |
| 0EVCCcqBJfeaaol0CA  | NUMA1    | 4926      | 0.000169897 | 0.003380198 |
| fbXbUllB2lApglJL98  | GGTLC1   | 92086     | 0.000170395 | 0.003382074 |
| uKz5I5_r3lOXok4V4g  | EDC4     | 23644     | 0.000170506 | 0.003382074 |
| oevLuAy95Rd4ZFHDk   | LDHA     | 3939      | 0.000170728 | 0.003382074 |
| BgFUhUUglQu3JDI_sU  | SETBP1   | 26040     | 0.000170728 | 0.003382074 |
| ETR9SdK_gUw6HXXMuU  | BMP2K    | 55589     | 0.000170838 | 0.003382074 |
| W4plklavdFXh96KfV8  | NARFL    | 64428     | 0.000170838 | 0.003382074 |
| 0foEUINK9JlglwUS4   | NFATC3   | 4775      | 0.000171503 | 0.003392426 |
| 6XQqyOloGJEivp7q14  | WDR25    | 79446     | 0.000172001 | 0.003399477 |
| ike2dzggSeqZez7Xug  | SMS      | 6611      | 0.000172887 | 0.003413545 |
| lks1Li4IEfh4d_pRd4  | PROSER1  | 80209     | 0.000172998 | 0.003413545 |
| x6pOiiirkCM6vnt96XU | OTUD5    | 55593     | 0.00017333  | 0.003417286 |
| Nql4j95H8BCddcrijk  | IFIT5    | 24138     | 0.000173552 | 0.003418839 |
| Qa6_OmX0CK4J7aHECo  | PRDX2    | 7001      | 0.000175269 | 0.00344982  |
| 06BH0VST9VK77_gR40  | CTAGE5   | 4253      | 0.000175822 | 0.003457878 |
| oG6kjni6FlaWXjSiX4  | SIVA1    | 10572     | 0.000176487 | 0.0034681   |
| uXi7kf6d5xedeCVZwA  | L3MBTL2  | 83746     | 0.00017693  | 0.003471111 |
| lV5KVKeJR1KQieOK_c  | DEFA1B   | 728358    | 0.00017693  | 0.003471111 |
| i.wATazaiea6daWvtc  |          | 10299     | 0.000177262 | 0.003474783 |
| BLnCuEdRQUi4iplyko  | ZBTB43   | 23099     | 0.000177982 | 0.003486043 |
| oqEcUQIX3oCjkgCFUk  | SLC30A1  | 7779      | 0.00017837  | 0.003490781 |
| 0iieSPJyqEnoPOen3g  | CCR6     | 1235      | 0.000178536 | 0.00349118  |
| OzSAinrrahSyijZ_LU  | NA       | NA        | 0.000178813 | 0.003493742 |
| ZpKhiaAzo4roi6gkok  | CD27     | 939       | 0.0001792   | 0.003496694 |
| B7s3le26s0fFJE2FHo  | NA       | NA        | 0.000179256 | 0.003496694 |
| NUJUrlX3SE.0EUmiHY  | MXI1     | 4601      | 0.000179588 | 0.003496793 |
| BofJlzqrxNLnrT7Jel  | FBXO8    | 26269     | 0.000179588 | 0.003496793 |
| 6tCecGIV9nhHtpFXRc  | NA       | NA        | 0.000179699 | 0.003496793 |
| EtIF_jxAF2JX3Sy654  | SQLE     | 6713      | 0.000179976 | 0.003497967 |
| fwes4Fd7dfPwO6NRjE  | TIMM23   | 100287932 | 0.000180086 | 0.003497967 |
| lVJ6FV._Ju4cd6eiVI  | CCDC107  | 203260    | 0.000180197 | 0.003497967 |
| ZRfIO1Ge_tAVd7TI38  | FAM53B   | 9679      | 0.000180529 | 0.003498746 |
| fVSIXlUHj3ISMNu3Xk  | LYPLA2   | 11313     | 0.000180529 | 0.003498746 |

|                     |              |           |             |             |
|---------------------|--------------|-----------|-------------|-------------|
| WJBSL9T2gr1eQCpEiU  | BCL7C        | 9274      | 0.000180806 | 0.003501279 |
| OconnsU_TX9QEdV.U4  | UBN2         | 254048    | 0.000181194 | 0.003503287 |
| xVR7p4.oP_5VTsJFX0  | IL2RG        | 3561      | 0.000181471 | 0.003503287 |
| NnkK0eex6pRX1whli0  | C22orf46     | 79640     | 0.000181471 | 0.003503287 |
| flgqNKiUCuHqCcCQY0  | NOP2         | 4839      | 0.000181692 | 0.003503287 |
| WF9nJzuPpeqefdekec  | SMPD2        | 6610      | 0.000181803 | 0.003503287 |
| lfnune873il_o8l310  | ENDOD1       | 23052     | 0.000181858 | 0.003503287 |
| NE01SK670u0hd8OpS4  | DNAJA1       | 3301      | 0.00018208  | 0.003503287 |
| WSXAKYaaPhILOPoiVE  | CDC42SE2     | 56990     | 0.00018208  | 0.003503287 |
| BS6WEpPo5IFyJS.OoE  | LONRF1       | 91694     | 0.000183132 | 0.003517927 |
| uEILE8eVOh5ZUeXSV4  | VPS72        | 6944      | 0.000183298 | 0.003517927 |
| Nrq4ur2.y73SPMCEnM  | SPOPL        | 339745    | 0.000183575 | 0.003517927 |
| clwRlqAqllF6x_1FeU  | ITM2C        | 81618     | 0.000183575 | 0.003517927 |
| ujAVU3hSATiDXiDBdU  | FAM213B      | 127281    | 0.000183575 | 0.003517927 |
| fuQ43TnShL5kqHXqlw  | PAPD5        | 64282     | 0.000184074 | 0.003522244 |
| roSL6CKleopJCKrRMU  | VEGFB        | 7423      | 0.00018424  | 0.003522244 |
| BITt3RedVMRN3kReng  | MGC2752      | 65996     | 0.00018435  | 0.003522244 |
| EmX16K4R_Oqu73rx70  | COL17A1      | 1308      | 0.000184461 | 0.003522244 |
| oidAild8WcmK4yhN6c  | EIF1         | 10209     | 0.000184683 | 0.003522244 |
| xtpJ0Dv6i5CA8pFUow  | N4BP2L1      | 90634     | 0.000184683 | 0.003522244 |
| WxECn1IXiURUpXNeBl  | ATP11B       | 23200     | 0.00018496  | 0.003524719 |
| 3DBJF6WrkunSI7DZJE  | TRIM13       | 10206     | 0.000185458 | 0.003525109 |
| EH7f0_R9HeXv9CqLCM  | MTMR4        | 9110      | 0.000185458 | 0.003525109 |
| WpS7.Dw07pSm66dGXs  | NA           | NA        | 0.000185458 | 0.003525109 |
| oonHKO31JdeS0KLFHs  | SKP1         | 6500      | 0.000185569 | 0.003525109 |
| N6602nVGeX1FI_Ke6E  | RABAC1       | 10567     | 0.000186067 | 0.003531776 |
| W1d3ISyMUXHjrxMxyo  | SDHD         | 6392      | 0.000186233 | 0.003532131 |
| x_3etJXok6jbjqAiiqg | CROCC        | 9696      | 0.00018651  | 0.003532838 |
| igVgS9VeuSoulMrp1w  | OAS2         | 4939      | 0.000186566 | 0.003532838 |
| 60syKX_Tepekvnd5d4  | GLT25D2      | 23127     | 0.000186732 | 0.003533191 |
| NilzAFDkXq5rp0Zew0  | LOC100128288 | 100128288 | 0.000187673 | 0.00354223  |
| ilHJEoJ0oYKSbyiDL4  | SNX29        | 92017     | 0.000187728 | 0.00354223  |
| 3i96OBhDdfiJ6Jhdhg  | PPP1R7       | 5510      | 0.000187839 | 0.00354223  |
| 6dE13GXuHXuqEL96OU  | ZBTB17       | 7709      | 0.000188393 | 0.00354223  |
| 35K6QDpHgZVfpJlgBU  | ZBTB40       | 9923      | 0.000188559 | 0.00354223  |
| 6P3L5Ylt59OueBu0pU  | C1orf131     | 128061    | 0.000188614 | 0.00354223  |
| NX9dVdU5slb3uwXU8A  | BCL9         | 607       | 0.000188614 | 0.00354223  |
| ERAvJ6t65d7r1J10so  | L2HGDH       | 79944     | 0.000188614 | 0.00354223  |
| 07qOVXh8cTRKBKI9uo  | LOC606724    | 606724    | 0.000188614 | 0.00354223  |
| 6ut9ioyRiut4ShwR8U  | TIMM23       | 100287932 | 0.000188781 | 0.00354223  |
| cXFu7uv_q.b_r_r34Y  | TOX2         | 84969     | 0.000188836 | 0.00354223  |
| oXEOrSOXqTJ0hELpf0  | CCNT1        | 904       | 0.00018939  | 0.003549838 |
| Ei3V7YSwL4DrhtR56c  | STARD3NL     | 83930     | 0.000189777 | 0.003554322 |

|                     |           |        |             |             |
|---------------------|-----------|--------|-------------|-------------|
| 9vX_vnRB0rORU7pJSk  | RANBP10   | 57610  | 0.000190331 | 0.003561909 |
| TlzucIRAgz7dPJeDuU  | PTGS2     | 5743   | 0.000190663 | 0.003565342 |
| flICHnhJ6la96.Qcaw  | TBC1D2B   | 23102  | 0.000191106 | 0.003570838 |
| QS1KOCKLEq17ie.hR4  | WDR11     | 55717  | 0.000191439 | 0.003574259 |
| fh4vm7ewO3mSrTnm1   | RABGAP1   | 23637  | 0.000191992 | 0.003581806 |
| ffV2vz2LW4IQklokpQ  | LIG1      | 3978   | 0.00019238  | 0.003585519 |
| 3qjh7rr_2cKKQSyrUo  | FAM178A   | 55719  | 0.000192491 | 0.003585519 |
| re7fU8kLC96UpuunRE  | NA        | NA     | 0.000192823 | 0.003587161 |
| uhSCp1kvQ_fL9SBwAU  | NA        | NA     | 0.000192879 | 0.003587161 |
| 6530r9KdBCqTred_SM  | DEFA4     | 1669   | 0.000194374 | 0.003612164 |
| KCV7vXqgnqh_oLjq7s  | DUSP2     | 1844   | 0.000194595 | 0.003613477 |
| ZRdR7js7WdXbe9VSjc  | MAPK8IP3  | 23162  | 0.000195813 | 0.003633283 |
| BeXp_gC8IJV0oIlg2KU | LOC653375 | 653375 | 0.000196423 | 0.003640499 |
| i4JVdIJXl7RtpP7iFw  | ICOSLG    | 23308  | 0.000196589 | 0.003640499 |
| NaeRSUq7SRJqcdcqMI  | SFI1      | 9814   | 0.0001967   | 0.003640499 |
| uxGdFpxSNhNFGiBSxY  | MAD1L1    | 8379   | 0.00019681  | 0.003640499 |
| Bohqovgi7pWT7Xr1Qw  | CYP27A1   | 1593   | 0.000197253 | 0.003645878 |
| ToJ6ycuXdzQNKv5F_I  | NPL       | 80896  | 0.000197475 | 0.003646393 |
| HikT5MglPqi9LoL3sl  | SHOC2     | 8036   | 0.000197586 | 0.003646393 |
| 6nhZEkt6fj.SW00_r0  | RAB8A     | 4218   | 0.000198693 | 0.003664009 |
| HVdKliAHy59SV9_ix0  | C11orf68  | 83638  | 0.00019897  | 0.003666293 |
| 03dSL5OyMk.P3uV8BU  | CLIC4     | 25932  | 0.000199967 | 0.003681828 |
| KLD6S4c6mR5cE.JXIU  | DFFA      | 1676   | 0.000200188 | 0.003682285 |
| 61WC8DfnvOue75UAUU  | ZNF491    | 126069 | 0.000200299 | 0.003682285 |
| i4tFSDVMGgH9zqtN78  | GPN2      | 54707  | 0.000200576 | 0.00368274  |
| Ql8Lf5_HR6jleKf6u4  | PAPD4     | 167153 | 0.000200631 | 0.00368274  |
| KShxEs6ueXeNnt5d.k  | SLC44A1   | 23446  | 0.000201351 | 0.003692548 |
| Wafno9OSUn_SvNljQl  | PTPN12    | 5782   | 0.000201573 | 0.003692548 |
| HdnkkTnm5TJoomaW3w  | KIAA0930  | 23313  | 0.000201628 | 0.003692548 |
| Zp51_cyCF6hloee3lc  | DEFA1B    | 728358 | 0.000202016 | 0.003696821 |
| ElSFFSjv9QDvUSm7Vk  | SEC16A    | 9919   | 0.0002034   | 0.003716477 |
| cXQU1KA_Eunks_HUuE  | ASCC3     | 10973  | 0.0002034   | 0.003716477 |
| OjKVfXiX67V6DigI90  | ZFYVE19   | 84936  | 0.000204397 | 0.003727365 |
| WN4cuoB9Or9dN7Ttjg  | CNIH      | 10175  | 0.000204452 | 0.003727365 |
| Evu45KxLmVPUHoMkv4  | RNF182    | 221687 | 0.000204563 | 0.003727365 |
| QQL3beT_6FLIPxIEKI  | CYB5R4    | 51167  | 0.000204618 | 0.003727365 |
| iwLclK5Lp0Zew1SH_o  | BMS1P5    | 399761 | 0.000204785 | 0.003727557 |
| ifw9_pdQwu1TK7elKU  | PVRIG     | 79037  | 0.000205228 | 0.003732784 |
| WU6QJEDoVWkXN1SECw  | KLF12     | 11278  | 0.000205671 | 0.003738004 |
| xV3Ts6bUkl_eHfe5c   | CLEC12A   | 160364 | 0.000205837 | 0.003738187 |
| Wiel19SVLIIBSR1OCM  | RAVER1    | 125950 | 0.000206058 | 0.003739375 |
| To0eg1I2JkvTkQpVvg  | DICER1    | 23405  | 0.000206778 | 0.003749598 |
| OSki9EQosCXh6FPkaM  | C2orf47   | 79568  | 0.000207166 | 0.003753786 |

|                    |           |           |             |             |
|--------------------|-----------|-----------|-------------|-------------|
| Wh_5_8kr.3vL.1VME8 | TWSG1     | 57045     | 0.000207941 | 0.003764986 |
| 6jUIPHBc9f.6oDeJck | PDGFC     | 56034     | 0.000208439 | 0.003771159 |
| ojyle9JTkqu_vzm55l | EIF4B     | 1975      | 0.000209436 | 0.003786334 |
| H3WhVfVXRdSkqEgwO8 | REXO1     | 57455     | 0.000209769 | 0.003788624 |
| 3qind8Fj1TvsSyOviU | ELAVL1    | 1994      | 0.000209879 | 0.003788624 |
| QCjrVJ7tAKCfv7DG7k | RSU1      | 6251      | 0.000210156 | 0.003790766 |
| Elafz5fxKDuMdKnx3M | HNRNPA2B1 | 3181      | 0.000210488 | 0.003791191 |
| oqjgg.l8f5UvXCHuL4 | AIDA      | 64853     | 0.000210544 | 0.003791191 |
| ERRUHoLT147nuJIOpc | CMAHP     | 8418      | 0.000210655 | 0.003791191 |
| E5w5yFLPwqcNORdfJ4 | LHFPL2    | 10184     | 0.000210876 | 0.003792329 |
| TV_6KSeKCjngqJXfeQ | ARHGAP4   | 393       | 0.000211264 | 0.00379645  |
| He6l5Uo.h2pfiH_TJI | PNP       | 4860      | 0.000211707 | 0.003800699 |
| Hx9OqoadRUI5lHu98l | WASH1     | 100287171 | 0.000211817 | 0.003800699 |
| 0lVMTluod_g0ohAnFE | ARG1      | 383       | 0.00021215  | 0.003801958 |
| KIH_VXne6ZWkLV7Bfg | FLYWCH2   | 114984    | 0.000212205 | 0.003801958 |
| xm4AHvjJCIKkktvU0  | TRIP12    | 9320      | 0.000212537 | 0.003805065 |
| oIT3W_ASNEkGEBnTpk | PARN      | 5073      | 0.000212814 | 0.003807177 |
| x78q_eilqcW37l4AUy | ZDHHC12   | 84885     | 0.000213036 | 0.003808296 |
| Wmu0l.30iT_.h4fUCQ | SLC35B3   | 51000     | 0.000213368 | 0.003810779 |
| Ne73XpnXVcLz572Vns | TAOK2     | 9344      | 0.000213645 | 0.003810779 |
| QXbOR3pefdS8fn7sIE | PDZD8     | 118987    | 0.000213811 | 0.003810779 |
| KG21JL6iu06CKeC_6E | TRERF1    | 55809     | 0.000213811 | 0.003810779 |
| iU7tU3QIEiQdEqx9EU | SLC15A4   | 121260    | 0.000214531 | 0.003817064 |
| 9kJ9dXSU_OgLOkl0kE | ALDH2     | 217       | 0.000214642 | 0.003817064 |
| cX_eH1318VJIHRXqto | FAM110A   | 83541     | 0.000214642 | 0.003817064 |
| xXS2uCBCveiuCxSKeY | ANO9      | 338440    | 0.000214808 | 0.003817185 |
| ZUiUnJURIVTSJAEhCI | NLRC3     | 197358    | 0.000215362 | 0.003824188 |
| QLsXPxiCPAeUXmpE9U | FMNL2     | 114793    | 0.000215694 | 0.003824418 |
| 6F69Qy_7_VCX92k034 | RRAGB     | 10325     | 0.000215694 | 0.003824418 |
| WHjjjSVOWruum5F7LU | HIATL2    | 84278     | 0.000216192 | 0.00383042  |
| rufi3fU3VEch7k_HDo | CD58      | 965       | 0.000216691 | 0.003836413 |
| l6VyLqLXjBUpe3hx.k | RB1       | 5925      | 0.000217355 | 0.003845336 |
| 6hInnRl..JCX3njoJE | FBXO3     | 26273     | 0.000217632 | 0.003847393 |
| xpynel6kdFV6fIRfdA | C9orf16   | 79095     | 0.000218407 | 0.003858251 |
| xcXQoQjmQJrp4onpQs | TBRG4     | 9238      | 0.000219238 | 0.003870071 |
| chz.FUSog9bshAko1U | STT3B     | 201595    | 0.00021957  | 0.003873082 |
| EpK.xzujRDHaFFF6SY | WWP2      | 11060     | 0.000219903 | 0.003876089 |
| OpfUBJ1tIXJB1FPqR4 | DAG1      | 1605      | 0.000220124 | 0.00387714  |
| TK5QXs68TSuwrmsSAk | TVP23B    | 51030     | 0.000220346 | 0.00387744  |
| u6CABK3SVKtdnR1dHU | TAB1      | 10454     | 0.000220567 | 0.00387744  |
| f8fArFgoKUrkunRISQ | TDRD1     | 56165     | 0.000220678 | 0.00387744  |
| l97_QDfV4veBUkU0sU | TMEM56    | 148534    | 0.000220789 | 0.00387744  |
| QnkeVInuOd7E37_yRE | HES6      | 55502     | 0.00022173  | 0.003891121 |



|                     |           |        |             |             |
|---------------------|-----------|--------|-------------|-------------|
| uoCUUnVfddwc_gZSAI  | DCP1A     | 55802  | 0.000222505 | 0.003896163 |
| 3KCeu1i11h15ULgSel  | NA        | NA     | 0.000222505 | 0.003896163 |
| 37Dwjz3pSua6dGXMNU  | APOPT1    | 84334  | 0.000222505 | 0.003896163 |
| KVMASruApN0mnIUU6c  | GNLY      | 10578  | 0.000224443 | 0.003924364 |
| 3rF5JIKIISXggjknjo  | QKI       | 9444   | 0.000224443 | 0.003924364 |
| ZoigEiF7I6OPPeV6h0  | GON4L     | 54856  | 0.000224831 | 0.003928275 |
| iUI_VR5HUV6kOiyh3s  | LLPH      | 84298  | 0.000225828 | 0.003942815 |
|                     | TMEM189-  |        |             |             |
| 3IHYIKUgKlKI6RLyeo  | UBE2V1    | 387522 | 0.000225994 | 0.003942842 |
| 0Ug6h7gerHfFOSEROU  | CGRRF1    | 10668  | 0.000226437 | 0.003942922 |
| odTqq0WI75x5B1EU98  | ATP5G1    | 516    | 0.000226437 | 0.003942922 |
| cck7iqHC73SLjv8NS0  | GPR65     | 8477   | 0.000226492 | 0.003942922 |
| ifeztLST8OFFx7uRJE  | PAQR3     | 152559 | 0.000227545 | 0.003958362 |
| W1KI1SrkC6T4hJBJ0   | PEX6      | 5190   | 0.000228043 | 0.003962265 |
| Bone.4oUOfCuh.vbAQ  | AMD1      | 262    | 0.000228154 | 0.003962265 |
| W_BUopor5rhXUN6kE4  | PIP4K2B   | 8396   | 0.000228375 | 0.003962265 |
| OddILSZKCJef6EaiAI  | CYB5A     | 1528   | 0.000228431 | 0.003962265 |
| HVJx_ljhiolOfiVKLw  | TNFAIP8L1 | 126282 | 0.000229594 | 0.003979555 |
| lpSqdREhwbKRzChSVA  | ZNF513    | 130557 | 0.000229926 | 0.003982433 |
| Z3EFHF73enn166556U  | ENTPD4    | 9583   | 0.000230147 | 0.003983389 |
| Ngm97SUV69_S9liiyU  | PLEKHA3   | 65977  | 0.000230535 | 0.003984341 |
| u4Pif.IRI9_P7L7_ko  | LEPR      | 3953   | 0.000230535 | 0.003984341 |
| r054EgqQiK6N7ioAhU  | YAF2      | 10138  | 0.00023203  | 0.004005359 |
| 03gFPDPX36erkuvxl4  | PDP2      | 57546  | 0.000232086 | 0.004005359 |
| xpd5VwUe5TFF1Qw0Ek  | ALAD      | 210    | 0.000232861 | 0.004015846 |
| u9dLKRbxd0IJVZSX_s  | SNAI3     | 333929 | 0.000233747 | 0.004025297 |
| fOigZNF5VN5NhJRNZc  | MIB2      | 142678 | 0.000233913 | 0.004025297 |
| KiQUC6h97dVnM9U_d4  | RAB27A    | 5873   | 0.000233913 | 0.004025297 |
| 63iQT6h4qBN4CcU34A  | PM20D2    | 135293 | 0.000234245 | 0.004028121 |
| ZoolY4o47IYukko4v4  | CUL9      | 23113  | 0.000234467 | 0.004029038 |
| KUnW793Cg8.REaFN.I  | YWHAG     | 7532   | 0.000235076 | 0.004035458 |
| HVnD0xdXXjv.VK8Q6U  | GNAQ      | 2776   | 0.000235187 | 0.004035458 |
| HnIJVHQf0vp3u0v9T0  | RNF38     | 152006 | 0.000235408 | 0.004035458 |
| l6jDp9KQdcl9VM3XI0  | RHOF      | 54509  | 0.000235574 | 0.004035458 |
| rOVeQVSVcd5dAhYuEw  | VPS4A     | 27183  | 0.000235685 | 0.004035458 |
| l5f5XV.Ee3lptBCYRI  | LRRC26    | 389816 | 0.000235851 | 0.004035458 |
| xLfTe1hC9HZdr5oXKE  | XPC       | 7508   | 0.000236516 | 0.004042768 |
| 9Vj517sCOX7bkgEDp4  | SRSF2     | 6427   | 0.000236682 | 0.004042768 |
| N6oTiekQQo33clQDbo  | LRRC1     | 85444  | 0.000236903 | 0.004042768 |
| 3ntYFxQiRAKJOTVuHk  | LTA4H     | 4048   | 0.000237125 | 0.004042768 |
| 6n4zDDx8O6WpGunRF4  | CHRNA5    | 1138   | 0.000237236 | 0.004042768 |
| ZKnavriJlfuOMvdpd60 | ARL6IP1   | 23204  | 0.000237291 | 0.004042768 |
| uUkqFMndK7tqqPePxl  | NA        | NA     | 0.000237845 | 0.004049223 |

|                    |           |        |             |             |
|--------------------|-----------|--------|-------------|-------------|
| TJc6LpWwNL4e7J35ek | NCALD     | 83988  | 0.000238122 | 0.004049223 |
| QXrTXDDqOKgv1JI.Sk | CD2AP     | 23607  | 0.000238177 | 0.004049223 |
| TuyL3X92A_Uu7H6fB0 | ST13      | 6767   | 0.00023862  | 0.004053878 |
| 0Us8a5d93IV.VKs3uo | CLCF1     | 23529  | 0.000239285 | 0.004062286 |
| oqKOe8coi.4jHkujuo | RANBP6    | 26953  | 0.000239561 | 0.004064107 |
| iLt7S.cPpO7Ked7h4l | CNOT7     | 29883  | 0.000240226 | 0.004071427 |
| fFPoXN_n3aeqeauej8 | DNPEP     | 23549  | 0.000240447 | 0.004071427 |
| 3qX_p3oF53q0_ulfol | C12orf44  | 60673  | 0.000240503 | 0.004071427 |
| feaZaFNeedxxeeZ3X8 | PEX16     | 9409   | 0.000241112 | 0.004076914 |
| 9co2WQUSkGhJQhsjU0 | MAP3K7    | 6885   | 0.000241167 | 0.004076914 |
| fgexZ3f.pSdRXVhgpQ | AATF      | 26574  | 0.000241555 | 0.004080445 |
| 3PgKIkGqeKW7SRjoVQ | FCAR      | 2204   | 0.000241721 | 0.004080445 |
| NgBXq3RNieeiuliCs  | TNRC18    | 84629  | 0.000241887 | 0.004080445 |
| 9q1y_fq_hDEoPn3qV4 | ZC3H10    | 84872  | 0.00024305  | 0.00409608  |
| oBVneWWeegVOKbn5Kc | LOC730256 | 730256 | 0.000243272 | 0.00409608  |
| B2N24JWQoWBFVF2PyE | RPS26P47  | 400156 | 0.000243327 | 0.00409608  |
| BSgrNJeuhjN3Y7dkuE | LMBRD2    | 92255  | 0.000243604 | 0.004096519 |
| l1eve9T.iYD6X6gAUy | STX11     | 8676   | 0.000243881 | 0.004096519 |
| 3VS7swnpP2Un7GyflE | MID1IP1   | 58526  | 0.000243936 | 0.004096519 |
| 6JKSi6oSKiJ_4eoS4A | HNRNPUL2  | 221092 | 0.000244158 | 0.004096519 |
| lHpdNEeovrn37d6t1l | GTF3C1    | 2975   | 0.000244324 | 0.004096519 |
| reQISyH_1SIPzuN9FU | CLEC2D    | 29121  | 0.000244379 | 0.004096519 |
| udS5Rqj7hX_vVeO.r0 | LYPLA1    | 10434  | 0.000244656 | 0.004097282 |
| QkAlQK9cJenkCCDQSo | PIK3CG    | 5294   | 0.000244767 | 0.004097282 |
| K6DSNcJTISnD5UUdUo | THOC7     | 80145  | 0.000244988 | 0.004098127 |
| NR7hpZNpN9VC59utVk | NOXA1     | 10811  | 0.000245819 | 0.004106198 |
| Bhnt0F1F2aaBWKEoI0 | BTF3      | 689    | 0.000245874 | 0.004106198 |
| uRtdb4RJ93ohXlKaTs | TCEA2     | 6919   | 0.000245985 | 0.004106198 |
| BCrSnX.y9lj0pJR1S4 | AP5M1     | 55745  | 0.000246207 | 0.004107034 |
| ZdHHmv5e5ehDimiUe8 | LRBA      | 987    | 0.00024665  | 0.004111561 |
| lDOHPcCnuKU6rPrwvk | DSC2      | 1824   | 0.000247037 | 0.004115159 |
| o_Go6fELXl4xcRFOOU | ASB6      | 140459 | 0.000247757 | 0.004124082 |
| Qj_97rsrORPUys5EaU | TVP23B    | 51030  | 0.000247923 | 0.004124082 |
| oeUsdO4vs7IVLnExko | PHF20L1   | 51105  | 0.000248089 | 0.004124082 |
| Bd156hFn6n_s_Hi6eE | SEC24C    | 9632   | 0.000248643 | 0.004130421 |
| fKOS0UHEB6XoLEtNGU | TTC21A    | 199223 | 0.000249031 | 0.00413205  |
| rX7txVTVZ7gblHgwLY | ERI3      | 79033  | 0.000249086 | 0.00413205  |
| 34kqEtP.wO._lqbrp0 | LRRFIP1   | 9208   | 0.000250471 | 0.00415214  |
| 69QJLwVB1wQT.aqN4U | CCBL2     | 56267  | 0.000251357 | 0.004162902 |
| ZVqLo9wO4.1ynHkoIU | SLC7A6    | 9057   | 0.000251467 | 0.004162902 |
| cenjghL3z_jikk3kXk | CHMP5     | 51510  | 0.000253129 | 0.004181595 |
| BQkv9UU1PE1Kqj9faQ | TANK      | 10010  | 0.000253184 | 0.004181595 |
| WieqgQYhS8gbFCLles | VTI1B     | 10490  | 0.00025324  | 0.004181595 |

|                    |          |        |             |             |
|--------------------|----------|--------|-------------|-------------|
| TVZKSaFlGJbj87ROkA | ING2     | 3622   | 0.000253295 | 0.004181595 |
| 3h_ilAXwNSlySXYyoU | DACT1    | 51339  | 0.000253738 | 0.004184969 |
| Bpeyv2kQv0mlgogB5c | ARMCX6   | 54470  | 0.000253849 | 0.004184969 |
| r6YEV9VUUB4JNUrQfQ | NA       | NA     | 0.000254236 | 0.004188477 |
| WEmXUuouEvovJSkq.c | CYHR1    | 50626  | 0.000254569 | 0.004191069 |
| 6LFR2tuvuel36uLgXs | ACSS1    | 84532  | 0.000255067 | 0.00419639  |
| 6pchvu.XSU.1d55VL8 | VIPAS39  | 63894  | 0.000255455 | 0.004199883 |
| B0JuunRI7DUkP6ilCk | NA       | NA     | 0.000256175 | 0.004206388 |
| E13QN9B35VO3X6SSjk | OTUD4    | 54726  | 0.00025623  | 0.004206388 |
| BH70tH4jgOfqsn.U10 | NUDT21   | 11051  | 0.000256396 | 0.004206388 |
| WneoUdII6ju6uijl_0 | NUDT16L1 | 84309  | 0.000256618 | 0.004206388 |
| 9btTXnoiYQgnRUoEKg | NA       | NA     | 0.000256728 | 0.004206388 |
| HfS4dYnkKdQp7Sp978 | MFSD10   | 10227  | 0.000257337 | 0.004210609 |
| 00buPhOysV5Rpc5VF4 | MKL1     | 57591  | 0.000257337 | 0.004210609 |
| fr.eioN6UIS1HxOjbs | ABHD3    | 171586 | 0.000260051 | 0.004252103 |
| WSkjjkiiYniZdSYvgv | NA       | NA     | 0.000260272 | 0.004252822 |
| lQuPtIfip0yC7ysad0 | PRPF4B   | 8899   | 0.00026066  | 0.004256252 |
| uEJQLpO.7k.sDnu_rl | CDKN1B   | 1027   | 0.000261158 | 0.004261485 |
| BXQAXfTijrhVJTihXY | NA       | NA     | 0.000261823 | 0.004269421 |
| oQkJ1QqOuV73cUJzXo | IL16     | 3603   | 0.000262321 | 0.004274638 |
| oofhV5XSYS6TQ7ggIk | TAF10    | 6881   | 0.000262709 | 0.004278044 |
| x3pjugVOjOip4czEU4 | AMY2B    | 280    | 0.00026354  | 0.0042834   |
| WYA7zWgBL1pak66dGU | SHROOM4  | 57477  | 0.000264038 | 0.0042834   |
| xW9WJgJx2UqOFOJu44 | SSBP4    | 170463 | 0.000264204 | 0.0042834   |
| WqJN9WdaVRhdRKvE_w | RAPGEF1  | 2889   | 0.000264204 | 0.0042834   |
| OR4XmVHt6R1cul4F6w | NA       | NA     | 0.000264204 | 0.0042834   |
| HAKXgN6WjmunTI7DVE | METT121A | 151194 | 0.000264426 | 0.0042834   |
| ud5wnWeSISkoshFaEU | FBXO9    | 26268  | 0.000264647 | 0.0042834   |
| fn.MJH.dBd3.dZ6TiA | NA       | NA     | 0.000264647 | 0.0042834   |
| WHcCDB1C36UpkunRF4 | TNFSF15  | 9966   | 0.000264647 | 0.0042834   |
| r7vfpWv01VTh67e4rk | LMF1     | 64788  | 0.000264924 | 0.004284986 |
| fX.hK7ke.7dS4kTFOY | FBXO33   | 254170 | 0.000265755 | 0.004295521 |
| WwjpLvdd6peNRdxFJU | PLEKHB1  | 58473  | 0.000267859 | 0.004326381 |
| KSbk7vQI8j6Y7bP9dE | TLR7     | 51284  | 0.000268025 | 0.004326381 |
| ixRdX.VCkTYF4vJKCo | CCZ1B    | 221960 | 0.000268247 | 0.00432704  |
| KdKjuHilSioXuKt78Q | RABL6    | 55684  | 0.000268634 | 0.004330377 |
| ctRKfX7CQtJJEnHRnk | SCMH1    | 22955  | 0.000269133 | 0.004335494 |
| 3iZfxfyOLn_lXe4MkY | FBXO34   | 55030  | 0.000270573 | 0.00435475  |
| xJ3qp4rqKpN4lSi8gk | C21orf58 | 54058  | 0.000270849 | 0.00435475  |
| Z90vg5FB6.i17iT0tl | NDFIP1   | 80762  | 0.000271126 | 0.00435475  |
| oQuEsSJEkmF_peAkuo | POLR1A   | 25885  | 0.000271237 | 0.00435475  |
| BXpexJ79cXHffsB3nk | KIF5B    | 3799   | 0.000271237 | 0.00435475  |
| KhuO2fd65UnV9et4hw | CLUH     | 23277  | 0.000271569 | 0.004357164 |

|                     |           |        |             |             |
|---------------------|-----------|--------|-------------|-------------|
| WrV7vs.7Jf9ep9J1XE  | CNOT1     | 23019  | 0.000272289 | 0.00436287  |
| KaBM1LHXr1yuJK45VI  | IFNGR1    | 3459   | 0.000272289 | 0.00436287  |
| uShfctJKk7_gDvDUGU4 | AGFG1     | 3267   | 0.000273951 | 0.004382201 |
| lfvVKi6tPpQKgTCspl  | ARHGAP30  | 257106 | 0.000273951 | 0.004382201 |
| xJda7kEMU3n9evdSfk  | NA        | NA     | 0.000274227 | 0.004382201 |
| EigSXiCh9.obuttKJE  | CHTF18    | 63922  | 0.000274227 | 0.004382201 |
| Nujkg.sigkneARFmOc  | PION      | 54103  | 0.00027528  | 0.004396082 |
| iVQtEvKGsjriNkjmcs  | KIDINS220 | 57498  | 0.000276719 | 0.00441292  |
| onuvl521ULhcxe79_U  | AKR1B1    | 231    | 0.000277107 | 0.00441292  |
| 9K1yu4XjFFFF7pJFqc  | TOR1B     | 27348  | 0.000277273 | 0.00441292  |
| K6ADqx8ua6QCUBEVel  | NA        | NA     | 0.000277273 | 0.00441292  |
| 6jOfg_jRdEv0ojuE.o  | UGP2      | 7360   | 0.000277439 | 0.00441292  |
| 9V1e6Je8XWT_EYt57g  | GIPC1     | 10755  | 0.000277439 | 0.00441292  |
| oUSKOdKWS6PPEQURSY  | MATR3     | 9782   | 0.000278159 | 0.004417333 |
| ix7EoR6Vd0rSCE5eio  | PPP1R16A  | 84988  | 0.000278159 | 0.004417333 |
| Td9zVITqUK57N4qO54  | RCOR3     | 55758  | 0.00027827  | 0.004417333 |
| oSxE1zIMLrVEsQrpdU  | PLBD1     | 79887  | 0.000278768 | 0.00442202  |
| NrwQ4wCdpamaqdGXsM  | NA        | NA     | 0.000279045 | 0.00442202  |
| rXs1QkmtPQhEjOR8xU  | CD58      | 965    | 0.000279156 | 0.00442202  |
| fiRIqnKp6192.nct_c  | HK2       | 3099   | 0.000279378 | 0.00442202  |
| 9lz0y7ygEUBeXO5TdE  | VPS37A    | 137492 | 0.000279488 | 0.00442202  |
| o5QK.H1JN4nendFXgk  | HIF1AN    | 55662  | 0.000280153 | 0.004429608 |
| 6dJRQO1eEV1UIVEjBM  | GPR146    | 115330 | 0.000280485 | 0.004431936 |
| Nd63i0H9nqgBc6BceQ  | SLC38A1   | 81539  | 0.000280817 | 0.004433962 |
| Hp.kpTMI3nkDnSV574  | EEF2K     | 29904  | 0.000280983 | 0.004433962 |
| OGI7VCUuKJwIRUrVQM  | IQCE      | 23288  | 0.000281925 | 0.004445889 |
| NHao516.tTcef49fo0  | MKRN1     | 23608  | 0.000282202 | 0.004447327 |
| cu10WLdO_A7CVXrqKY  | LSG1      | 55341  | 0.000283309 | 0.004461846 |
| WBQjRIHk8SXrkiQh3s  | TMEM156   | 80008  | 0.000283918 | 0.00446731  |
| 3o9516f595p9rohLzo  | DHX37     | 57647  | 0.000284029 | 0.00446731  |
| NFeivZt1h5NUcJTZqs  | MYO1G     | 64005  | 0.000284472 | 0.004471342 |
| N93o5RixQv.IIINbc   | CDC14A    | 8556   | 0.00028558  | 0.004484606 |
| HonqnQVHv.Cj_Z8fuk  | BCAT1     | 586    | 0.000285691 | 0.004484606 |
| BDRztBIRK79X19M4ol  | NA        | NA     | 0.000286909 | 0.004487823 |
| u10TVIY6mlKSIR10fU  | NA        | NA     | 0.000286909 | 0.004487823 |
| WnnRzFdeTnyDDn_Kok  | BTF3L4    | 91408  | 0.00028702  | 0.004487823 |
| xBtfe1NurBJfqirkic  | CHMP1A    | 5119   | 0.00028702  | 0.004487823 |
| Z994OdWBx4f4IrJdeU  | PDE4B     | 5142   | 0.00028702  | 0.004487823 |
| Zl5rjUey5KT6md6Rfc  | PTPN2     | 5771   | 0.00028702  | 0.004487823 |
| u0l18EIKhJCnrpiqI0  | VAV1      | 7409   | 0.000288016 | 0.004500131 |
| lfQSwCH6T6epOunRI4  | ZNF69     | 7620   | 0.000288183 | 0.004500131 |
| 0hBxiSlaC4J6CEoOrk  | TSTA3     | 7264   | 0.000288626 | 0.004504113 |
| ZVU4RC.F7MEBeROzV4  | DNAH6     | 1768   | 0.000288902 | 0.004505499 |

|                     |         |        |             |             |
|---------------------|---------|--------|-------------|-------------|
| 9VFKU1Uxfev4KZ4R6Q  | MAP2K5  | 5607   | 0.000290176 | 0.004522418 |
| fcjV9PPfzUiwNUjo0   | TAF1B   | 9014   | 0.00029073  | 0.004525667 |
| TCgmomomQjmokkgokk  | NA      | NA     | 0.000290841 | 0.004525667 |
| 0KXfulzCu.18LhOleY  | NA      | NA     | 0.000290951 | 0.004525667 |
| Wrl7P01ciStJdfVcOY  | SLC18B1 | 116843 | 0.000291339 | 0.004528756 |
| 6oiX7gf8n_uRJ4xSio  | ZNF75D  | 7626   | 0.000291948 | 0.004532343 |
| EJ500rGLn1M1PxUU_k  | UTP14A  | 10813  | 0.000291948 | 0.004532343 |
| lL4jSi9iFJ_nhEkAVQ  | NA      | NA     | 0.000292336 | 0.004532986 |
| 9uRN57lK_CzLoFTSyw  | MZT1    | 440145 | 0.000292502 | 0.004532986 |
| cvtlr95JeXUe4Ah.kk  | TRIM23  | 373    | 0.000292557 | 0.004532986 |
| lqlFQi4BMfzFlokuiU  | WNK1    | 65125  | 0.000293056 | 0.004537773 |
| NFhtJB9hii9FqilVEc  | PKN1    | 5585   | 0.000294274 | 0.00454953  |
| 3lFqUIJKCX5oi4aIN4  | DGCR14  | 8220   | 0.000294274 | 0.00454953  |
| Kqe8HpKAj9JN4OLVJE  | OGFRL1  | 79627  | 0.000294385 | 0.00454953  |
| Tr_TUleITsoBF.SFSk  | DDX42   | 11325  | 0.000294772 | 0.004552584 |
| rS7tfgXh4ye.wiUel4  | FAM96A  | 84191  | 0.000295326 | 0.004558197 |
| fUet3h5f1RIRJEDnKU  | MMS19   | 64210  | 0.000296046 | 0.004566367 |
| uXnlI7s4OliN5NCV14  | ME2     | 4200   | 0.000296323 | 0.004567696 |
| oCdVUVnl5r.v3vAG0U  | NOP14   | 8602   | 0.000296821 | 0.004571675 |
| ZuoTiQOkg8qmLn9DnY  | PRTFDC1 | 56952  | 0.000297098 | 0.004571675 |
| cF6luCGpOGkrgqv57g  | ZSCAN2  | 54993  | 0.000297154 | 0.004571675 |
| ZUBAKISAAhLhZbg7IZU | PRKAG2  | 51422  | 0.000297375 | 0.004572146 |
| HRHnqE6SofRLqr.yek  | PARD6A  | 50855  | 0.00029804  | 0.004574026 |
| BP.emLwtSSvebp5VSo  | TBC1D24 | 57465  | 0.000298206 | 0.004574026 |
| EG.6grleOJriCVoNV8  | SDHAF1  | 644096 | 0.000298261 | 0.004574026 |
| NBKgiU2C.S2uJfqRdE  | IFNAR2  | 3455   | 0.000298261 | 0.004574026 |
| EpdXknpQ4cRLojBUkk  | NCAPH2  | 29781  | 0.000299535 | 0.004590619 |
| cJUfpVFXQwFu6f6Hds  | ZBTB48  | 3104   | 0.000300809 | 0.004607192 |
| x9d6eNUlcGqyFbt.U   | BCL2L13 | 23786  | 0.000301362 | 0.004611473 |
| NUXpIA3H3EvqnhIXVo  | PEX16   | 9409   | 0.000301473 | 0.004611473 |
| oIlMw7kpDbo7d4QLu0  | DEK     | 7913   | 0.000301861 | 0.004614455 |
| NgZfVdL79wiSLdWeQ0  | HTT     | 3064   | 0.000302082 | 0.004614896 |
| Z5CedP.gSf.k6jKJO0  | SPHAR   | 10638  | 0.000302857 | 0.004623792 |
| cuQcHh3vPjV915X9Uo  | PRKAR1A | 5573   | 0.00030319  | 0.004625916 |
| 9XKsy9KrNQ1.p9XqU4  | UQCR10  | 29796  | 0.000303688 | 0.0046289   |
| KVTy0u8Se76oygszek  | BTBD1   | 53339  | 0.00030391  | 0.0046289   |
| E8.cexPv9.tUL4XKuE  | CPNE8   | 144402 | 0.000303965 | 0.0046289   |
| uiXghHokgNPRt4_7mo  |         | 220972 | 0.000304796 | 0.004635655 |
| B5X8KJTqSCle4SoUuE  | RINL    | 126432 | 0.000304796 | 0.004635655 |
| lXXuxKgiKrE.V7nhol  | SREBF1  | 6720   | 0.000305903 | 0.004647441 |
| NsgkrU7f_6.XkTf6LI  | MRPS10  | 55173  | 0.000305959 | 0.004647441 |
| En_ZMOp8oe6inwvjkj  | PIGY    | 84992  | 0.00030618  | 0.004647858 |
| iStkhHQBNfRtkPDv74  | CCDC176 | 80127  | 0.000308561 | 0.004681039 |

|                    |          |           |             |             |
|--------------------|----------|-----------|-------------|-------------|
| rJJ77XwA4PhelqZrp0 | SEMA3E   | 9723      | 0.000309392 | 0.00469022  |
| ohQSSlzl.dPfpXJLqE | STK17B   | 9262      | 0.000309558 | 0.00469022  |
| KopuoOrnt9d.0TTphl | ZBTB42   | 100128927 | 0.000310832 | 0.004701743 |
| inoFeqHGG1dAX59yiM | YWHAZ    | 7534      | 0.000311053 | 0.004701743 |
| 3i3eu4Lp8reh60nukU | ZNF775   | 285971    | 0.000311275 | 0.004701743 |
| KXb.VE7Xk1dVR6Lj9I | PITPNB   | 23760     | 0.000311386 | 0.004701743 |
| Z1C5pHkClZ9C6ogmmM | NA       | NA        | 0.000311441 | 0.004701743 |
| xWV_o_ZOipANWuHTIA | GPX1     | 2876      | 0.000311496 | 0.004701743 |
| HVX9ye7jshQLb5V1eo | ZNF580   | 51157     | 0.000311939 | 0.004704173 |
| NHpvnq6Y5W13p_rw98 | SGSH     | 6448      | 0.00031205  | 0.004704173 |
| ELVJH_lpYriGol6fgc | IPP      | 3652      | 0.000312382 | 0.00470622  |
| cSxLn7VpJKJ_vrvLec | C9orf106 | 414318    | 0.000312604 | 0.004706597 |
| uAEmnregoF4nGJZppl | PSEN1    | 5663      | 0.000312825 | 0.004706974 |
| HgF4H96uogUrri5Yrc | CYTH1    | 9267      | 0.000313379 | 0.004712346 |
| WBf1LPrE36felQFUJI | LTN1     | 26046     | 0.000314154 | 0.004721041 |
| oNFeo5ISvlpUlfKolM | TMEM229B | 161145    | 0.000314376 | 0.004721407 |
| 0SXouANerHh.iKLi7k | NABP1    | 64859     | 0.000314874 | 0.004725929 |
| f46oq_6qjrj4S5SiM  | NA       | NA        | 0.000316037 | 0.004739695 |
| BUoo1fjV_6UovqIUl4 | NEK8     | 284086    | 0.000316646 | 0.004739695 |
| l3qnutFdg5uiCePaCg | NOSIP    | 51070     | 0.000316757 | 0.004739695 |
| 0JAeyV4FPI6Xe9Wynk | SNORA80  | 677846    | 0.000316868 | 0.004739695 |
| 3vYKRjObtTXxQKPuFk | QKI      | 9444      | 0.000316979 | 0.004739695 |
| 6TdHCrwKbkFVR6e7Vc | AKAP13   | 11214     | 0.000316979 | 0.004739695 |
| oehvpEueo4c6lVA7dl | FCGR2A   | 2212      | 0.000317366 | 0.004742531 |
| 3hZb3QoasCrdelAPVQ | TTI2     | 80185     | 0.00031792  | 0.004747844 |
| ceSX_8flUGIK2UKI2U | CUTA     | 51596     | 0.000318418 | 0.004752324 |
| KXIXe.WOK7Gji4Xkcl | WDR5     | 11091     | 0.000319138 | 0.004760103 |
| Z.1NUE_OCbSge7tyOw | UBE2H    | 7328      | 0.000320135 | 0.004769856 |
| No2Sg0qgLj.Arr91JE | RAP2C    | 57826     | 0.00032019  | 0.004769856 |
| 0lZjRfk6EkNewE0SLo | KLHDC2   | 23588     | 0.000321132 | 0.004778098 |
| xXVB3jQjfdg1eUXUXk | EVI2B    | 2124      | 0.000321575 | 0.004778098 |
| rHSkjDjXcelV8lCS.c | CD46     | 4179      | 0.000321575 | 0.004778098 |
| lVT31.qrOO6Cev0lSg | SIGMAR1  | 10280     | 0.000321741 | 0.004778098 |
| chKgeE.4a3FJumnrv0 | ARPC5L   | 81873     | 0.000321741 | 0.004778098 |
| ol9ui.hDisSkqknZjk | SNRPA    | 6626      | 0.00032307  | 0.004794863 |
| f.E1AqoykfoVU91CIY | CD99     | 4267      | 0.00032379  | 0.004797766 |
| uAA6n_REOr_ieHqBDo | DNAJA2   | 10294     | 0.00032379  | 0.004797766 |
| r8u95aKFSWXUNXhJ18 | TMUB1    | 83590     | 0.000323901 | 0.004797766 |
| BodPXL_iAMfQUiSol4 | RASGRP2  | 10235     | 0.000324067 | 0.004797766 |
| ilARBeXpam66biXttU | FCAR     | 2204      | 0.000325396 | 0.004813952 |
| uRSES4U1Fftcn6Z54k | GMEB1    | 10691     | 0.000325562 | 0.004813952 |
| f76JEpVKfXIKIWPffM | FAM78A   | 286336    | 0.000325894 | 0.004815376 |
| f66EuKloSlcSwVhGCQ | HAX1     | 10456     | 0.00032606  | 0.004815376 |

|                    |           |        |             |             |
|--------------------|-----------|--------|-------------|-------------|
| ot96nUUt3IUUz1.tHE | RFWD3     | 55159  | 0.000327556 | 0.004834477 |
| 9i6p9OFO5NIPI6LuR4 | ZNF544    | 27300  | 0.000328386 | 0.004843752 |
| ipJ3u3iC9xPhSIV U  | SIDT1     | 54847  | 0.000329051 | 0.004848962 |
| ZnvVZDjg6k6.p4EfkG | NA        | NA     | 0.000329328 | 0.004848962 |
| HelRdSXSck8V94R3c4 | SLAMF6    | 114836 | 0.000329494 | 0.004848962 |
| ZNPpfBVeXjtSuBhdbo | SLC38A10  | 124565 | 0.000329549 | 0.004848962 |
| 6nngsu.KNdTply4Owg | CCNG1     | 900    | 0.00033038  | 0.0048582   |
| Zbu1ugUtclm7hLfk94 | HK1       | 3098   | 0.000331155 | 0.004866613 |
| T6HQktdUXyXXgyeDEo | NA        | NA     | 0.000332373 | 0.004881523 |
| fMt4t9d3hC8qTofhUk | ZNF211    | 10520  | 0.00033265  | 0.004882595 |
| ZqwwKctIFcxTAuy8Uw | LYPLA1    | 10434  | 0.000333093 | 0.004886104 |
| cJTeEkpRy4S.f_71zo | MAP3K8    | 1326   | 0.000333426 | 0.004887985 |
| Q9_zXS5esSh_ESLL70 | DCAF10    | 79269  | 0.000333813 | 0.004890674 |
| cnkCc4zAed_51AqMXg | DAPP1     | 27071  | 0.00033481  | 0.00490228  |
| foiUg5xAIDRJ5yCzXU | ELOVL7    | 79993  | 0.000335918 | 0.004915492 |
| 3S6CIBWiGhXil_9SCg | CCDC101   | 112869 | 0.000336361 | 0.00491897  |
| 0Xk3s.zLSX.hReuUnM | ASAP2     | 8853   | 0.000336582 | 0.004919206 |
| HFXowKR.R5e0eNJIx4 | MAPK1IP1L | 93487  | 0.000337302 | 0.004924528 |
| fTuJVeOUWJKpJ9OFjs | PCNXL2    | 80003  | 0.000337357 | 0.004924528 |
| ZrvnHleKv1KLLHOE04 | CLEC12B   | 387837 | 0.000338133 | 0.004932839 |
| Qfoc5Ut2vUvcfUkgqk | CHKB      | 1120   | 0.000338853 | 0.004937775 |
| WeuDulz_fGinmikEkE | SPINT3    | 10816  | 0.000339129 | 0.004937775 |
| ud1VRFVEicHq8S7.NY | KRAS      | 3845   | 0.000339129 | 0.004937775 |
| i4VCpSTqgiOvkpAOR8 | CRY2      | 1408   | 0.000339296 | 0.004937775 |
| WqPEpuLhTlydH1K.BI | DTX3L     | 151636 | 0.000340514 | 0.004952496 |
| H8s6hD4M5f.eaiyuql | TRAPPC6B  | 122553 | 0.000342784 | 0.00498108  |
| ETt_XSFdER7Xd5eQR0 | CYB5D1    | 124637 | 0.000342895 | 0.00498108  |
| NpJlgEC3oVHU53ldIU | COG4      | 25839  | 0.000343615 | 0.004988513 |
| BieVHjhHHziiRIYjCk | RNF181    | 51255  | 0.000344556 | 0.004994093 |
| TirAuJclKK7_qdzZk0 | GFOD1     | 54438  | 0.000344778 | 0.004994093 |
| i1GgEgdjkeF51KAul  | PRKCZ     | 5590   | 0.000344833 | 0.004994093 |
| iKSK_54tiOuU_d2.qQ | PDCD4     | 27250  | 0.000344833 | 0.004994093 |
| 6gnH9UqczpCQtkCeo0 | CRELD1    | 78987  | 0.000346439 | 0.005012093 |
| QqAk9K.J9SdLSTSLtQ | ZNF23     | 7571   | 0.000346495 | 0.005012093 |
| oRnXe9LZArgR05pUIM | PIN1      | 5300   | 0.000346938 | 0.005013247 |
| QVuhFUheYKONIYwlaM | MATK      | 4145   | 0.000346993 | 0.005013247 |
| 9p9edCEWPWcT1FQRFI | RBBP8     | 5932   | 0.000347602 | 0.005019021 |
| IgUgXRN_e9aZUcVCAU | CKS1B     | 1163   | 0.000347934 | 0.005020792 |
| Zh7iRpOIJtN1Kfh9Do | TUBGCP2   | 10844  | 0.000349873 | 0.005044282 |
| E7Kr3rjrrF3zxfOwBE | RWDD4     | 201965 | 0.000349983 | 0.005044282 |
| fxFV3VGC.O.o8Tkbul | MOB4      | 25843  | 0.000350482 | 0.005048427 |
| xrlPVJvy.cil0v3U0k | MTHFR     | 4524   | 0.000351257 | 0.005056554 |
| xH031ULmqLEKTPsirk | CXCR3     | 2833   | 0.000351922 | 0.005063078 |

|                     |          |        |             |             |
|---------------------|----------|--------|-------------|-------------|
| cSEFX6dSe0oUh4juSc  | NA       | NA     | 0.000352365 | 0.005066408 |
| NUrbkugt4JRVMWI3og  | TMEM179B | 374395 | 0.000353029 | 0.005072918 |
| WlqErSEVKVfUiFdTgc  | CLN3     | 1201   | 0.000353472 | 0.005076239 |
| 61RbnpngeHtZ5QqC4Q  | ABCC13   | 150000 | 0.00035386  | 0.005078761 |
| QpUTnhEh0dlhXyEehQ  | POMGNT1  | 55624  | 0.0003553   | 0.005096372 |
| 6X6V1CnqAIQ4QtA1IU  | PSMA1    | 5682   | 0.000356075 | 0.005102177 |
| ooBQpIniqEqKJIJTQg  | SLC25A11 | 8402   | 0.00035613  | 0.005102177 |
| oelKRQk7u5H7F66.d4  | SLBP     | 7884   | 0.000357792 | 0.005118381 |
| x3Vk3F6cKEIUeIDUKk  | EIF3G    | 8666   | 0.000357902 | 0.005118381 |
| KzUCcVLV_F SRL6WFbs | VPS13D   | 55187  | 0.000357902 | 0.005118381 |
| iyiJe56uUI6ISacX5w  | SKIV2L   | 6499   | 0.000358567 | 0.005124825 |
| WuqFJlwNUV9fie2ex0  | KLHDC3   | 116138 | 0.000359397 | 0.005133634 |
| fwygeCZaiU4J5KFTik  | SMC1A    | 8243   | 0.000360117 | 0.005140852 |
| xR8N6vIOoV7SOJOei4  | NA       | NA     | 0.000360394 | 0.00514174  |
| NeKcQvLSSOLLULI.3o  | PAIP2    | 51247  | 0.00036117  | 0.005149734 |
| WyCgXoiShU6epp64ks  | TRMU     | 55687  | 0.000362    | 0.005158507 |
| BlfRT7oOOV6fwr8nUQ  | KLF9     | 687    | 0.000362831 | 0.00516727  |
| 08PiKpKnogokL7qiUo  | CCDC69   | 26112  | 0.00036416  | 0.005179401 |
| QKBQNIEnSQVeD_Et0U  | HDAC2    | 3066   | 0.000364381 | 0.005179401 |
| fbdR4AyADyepOuuplw  | HYPK     | 25764  | 0.000364548 | 0.005179401 |
| NoVejX5T1XScOGi518  |          | 64757  | 0.000364548 | 0.005179401 |
| iUYIEVx3EloCqvo6gg  | ZMAT4    | 79698  | 0.000365378 | 0.005185838 |
| reEru5lNPqpO9Eunoc  | ERGIC3   | 51614  | 0.000365434 | 0.005185838 |
| KqKjqfNQUty86K15yU  | HNRNPH2  | 3188   | 0.000365932 | 0.005189836 |
| iukKCAu9Yk2uncGUEk  | SSFA2    | 6744   | 0.000367316 | 0.005204998 |
| ODyWr1NF7r1J4rqKNE  | PXMP4    | 11264  | 0.000367538 | 0.005204998 |
| BqfA3QH_8osEom54mo  | FAM210B  | 116151 | 0.00036787  | 0.005204998 |
| 36fK845l197mFDiGH0  | PELI2    | 57161  | 0.00036787  | 0.005204998 |
| uVueGDdTuNu1.dTueU  | SNX29    | 92017  | 0.000368867 | 0.005208535 |
| EHTIUioe4Ap9e4XWOk  | SAP30BP  | 29115  | 0.000368978 | 0.005208535 |
| udET_KS60BKwJc47u0  | ELOVL5   | 60481  | 0.000369088 | 0.005208535 |
| Wln.vp93VifuXj3ulQ  | FAM120B  | 84498  | 0.000369144 | 0.005208535 |
| QHzs9FCVADI_6dUo9Q  | DR1      | 1810   | 0.000369255 | 0.005208535 |
| lKgeXLsEOAUj90fnfQ  | ALDH6A1  | 4329   | 0.000369642 | 0.005208535 |
| oCd7geXnte4HI55Xul  | PNPLA7   | 375775 | 0.000369642 | 0.005208535 |
| K4Ou.WiiQt9QeruTk   | PHTF1    | 10745  | 0.000370805 | 0.00522185  |
| fX_OgDkilfXd7lufnU  | TRPV1    | 7442   | 0.00037158  | 0.005229693 |
| NSkvOolcipelvnPoU4  | SF3B1    | 23451  | 0.000371968 | 0.005230562 |
| Hss3ASUpWuEDrSfSQU  | SNAP23   | 8773   | 0.000372079 | 0.005230562 |
| 3x6lSnodJxNYx1SN7k  | ATP5EP2  | 432369 | 0.000374239 | 0.005254099 |
| BlfewJg4o6Gbq4XCn0  | MEF2A    | 4205   | 0.000374239 | 0.005254099 |
| ipb3Zfr.cr7vmkonh4  | NA       | NA     | 0.000374682 | 0.005254099 |
| uenXAO5QgnnsVANfX4  | HEMGN    | 55363  | 0.000374737 | 0.005254099 |



|                     |           |        |             |             |
|---------------------|-----------|--------|-------------|-------------|
| rwsKSij4fqHXp2IUeO  | RNF185    | 91445  | 0.000375069 | 0.005254099 |
| uJEnKJd4T7eu.xut70  | PTBP3     | 9991   | 0.000375069 | 0.005254099 |
| fErjfdbbhv5P9_RTv4k | GPR89B    | 51463  | 0.000375346 | 0.005254904 |
| KsErRfqeSoR_kFP.Ek  | FLJ16734  | 641928 | 0.000375568 | 0.005254934 |
| liiOaCdSIGuSidSCZ8  | LOC606724 | 606724 | 0.000376011 | 0.005258062 |
| 3qL.LbKXzjDxVmuu7I  | MED28     | 80306  | 0.00037745  | 0.005275116 |
| 3SaBZUo0j5O4d4J4YE  | FYN       | 2534   | 0.000377727 | 0.005275908 |
| NPY5UqLUmDht7pQmK0  | ZNF395    | 55893  | 0.00037817  | 0.00527675  |
| iVas_FUhBDIH0z6ofY  | NAIP      | 4671   | 0.000378281 | 0.00527675  |
| 3IMXrtQIHTiX7t6nnk  | PASK      | 23178  | 0.000378613 | 0.00527675  |
| TASKea9AhURGRcFa54  | PTP4A3    | 11156  | 0.000378669 | 0.00527675  |
| crU3qCaj_r44ogOkUk  | BEND5     | 79656  | 0.000381493 | 0.005313015 |
| Qq7CX0l6QvE7ICVEfs  | SLC40A1   | 30061  | 0.000382933 | 0.005329968 |
| 07yvMP3T_iWpkunRI4  | CREB1     | 1385   | 0.000383763 | 0.005338428 |
| 3wjozj9AAypama6dGU  | ZMAT3     | 64393  | 0.000384816 | 0.005349957 |
| xvrrv4q_nIDglej.uU  | GCA       | 25801  | 0.000385148 | 0.005351287 |
| TSolxHn0RRCluoDfoo  | PPAPDC1B  | 84513  | 0.000385646 | 0.005351287 |
| B1x16l8TtI76p8IUr4  | CHAMP1    | 283489 | 0.000386089 | 0.005351287 |
| Td4X07XynudeUdxXhE  | AHSP      | 51327  | 0.000386145 | 0.005351287 |
| f_uHe5X53cH3iVF1So  | IVD       | 3712   | 0.000386422 | 0.005351287 |
| iuDEktS8N_ukn3_knU  | CRLS1     | 54675  | 0.000386532 | 0.005351287 |
| B.fZp50l4Fh32oCYBU  | CHMP5     | 51510  | 0.000386698 | 0.005351287 |
| lUoO6nfLj1lwqQJeqU  | NSUN3     | 63899  | 0.000386698 | 0.005351287 |
| uNk5CT4XFEXE1R7l5M  | PPM1A     | 5494   | 0.000387308 | 0.005355062 |
| lX5zllXqEih57eV3es  | DEFA1B    | 728358 | 0.000387418 | 0.005355062 |
| NU1SQcNifXlTcFVKk   | CRTC3     | 64784  | 0.000389578 | 0.005381809 |
| BRfpXAEIFKakloiWhI  | SGTA      | 6449   | 0.000390021 | 0.005384824 |
| iW5J4VSGOKOUwlo2FI  | PRKCZ     | 5590   | 0.000391073 | 0.00539624  |
| ZcSLYx7i.UF0lTe6kg  | NBPF3     | 84224  | 0.000391793 | 0.005403061 |
| Nd91eTR709EOAryggk  | ACN9      | 57001  | 0.000392568 | 0.005407527 |
| WV75H6een1XTXe94L8  | ZNF230    | 7773   | 0.000392568 | 0.005407527 |
| xONB.H0qk_3r3.nnvk  | SLC25A40  | 55972  | 0.000393344 | 0.005410398 |
| xmKeUSKOgO18JkleL4  | FCGR1A    | 2209   | 0.000393344 | 0.005410398 |
| 0XHqK6hV.T.S.503Kg  | H2AFY     | 9555   | 0.000393454 | 0.005410398 |
| xlKKv3p7r3A6JVKeU   | NCOA5     | 57727  | 0.000393953 | 0.005414081 |
| 3nrn0i0_khPU795754  | NA        | NA     | 0.000394174 | 0.005414081 |
| iYLSAHTTsmGV6aerog  | ATP1A1    | 476    | 0.000395005 | 0.005422381 |
| fp9BC6XLDRd19QXS4U  | SH3GLB1   | 51100  | 0.000396832 | 0.005439636 |
| 0IKDp61lp.7UdXdHol  | ZNF589    | 51385  | 0.000396888 | 0.005439636 |
| ZkpUBVRKQkB4QBQiwQ  | CSNK1A1   | 1452   | 0.000396943 | 0.005439636 |
| ThEuLTRP11R5e6X71E  | OGFOD1    | 55239  | 0.000397386 | 0.005442515 |
| WfRSa_o_lSfoufu61A  | RMND5A    | 64795  | 0.000397608 | 0.005442515 |
| cpQdZxYe3ed3CDK.V0  | PXMP4     | 11264  | 0.00039794  | 0.005443953 |

|                     |           |        |             |             |
|---------------------|-----------|--------|-------------|-------------|
| HkoivSf3j.Huhf9cKk  | FAM149B1  | 317662 | 0.000399269 | 0.00545893  |
| uHqCSUFd7IlgNUj6i3o | NA        | NA     | 0.000399491 | 0.00545893  |
| BGm6KH.W4IIY56KKz0  | ABCA7     | 10347  | 0.000399823 | 0.005459511 |
| ojejiSNbROd916niZQ  | PIDD      | 55367  | 0.000399989 | 0.005459511 |
| 3rndqcX4Glz9UI93ko  | ARIH1     | 25820  | 0.000400653 | 0.005465467 |
| QYlur3niyuidPn91Cc  | ITM2C     | 81618  | 0.00040093  | 0.005466131 |
| 3BINNCBlxCCpi4qRJo  | POMC      | 5443   | 0.000402259 | 0.005481132 |
| 0bRTzA98vSp6ma6dOU  | GRIPAP1   | 56850  | 0.000402813 | 0.005485455 |
| xHHCIKrki78XrndBKE  | DIABLO    | 56616  | 0.000403035 | 0.005485455 |
| HUruR6C4rROJJuollc  | XYLT2     | 64132  | 0.000403422 | 0.005487613 |
| 6Q4glErjZoc4iaGpTE  | EDF1      | 8721   | 0.00040525  | 0.005509342 |
| QFxfhZChNiiReSburT8 | STUB1     | 10273  | 0.000405859 | 0.005514494 |
| OY0MIXDRO55AyX14XU  | NA        | NA     | 0.000407742 | 0.005536936 |
| BuoBX.m618p8Q7keDY  | PRNP      | 5621   | 0.000408129 | 0.00553906  |
| HSV3JlIm0uS27zVp.xl | TMCO3     | 55002  | 0.000408572 | 0.005541932 |
| 0eCamjRCtKE2AU168E  | ZNF773    | 374928 | 0.000408905 | 0.0055433   |
| TVIRNFFWH4ISyufg6A  | GGPS1     | 9453   | 0.000409458 | 0.005547668 |
| 9o1f3eDoiPiKjtqS9U  | BFAR      | 51283  | 0.000409846 | 0.005549781 |
| x5e9LxIC650vsg7PsU  | YY1       | 7528   | 0.000410566 | 0.005556388 |
| 3eYv9q6khke_DeslKs  | SAFB2     | 9667   | 0.000410898 | 0.005557745 |
| OierrMKe13QnrnuylE  | IL36G     | 56300  | 0.000411286 | 0.005559849 |
| Q8ApAlkKSCinq1eDRY  | PILRB     | 29990  | 0.000412338 | 0.005570928 |
| fxTO5_XSwDgVR6uplo  | ITGA4     | 3676   | 0.000414055 | 0.005587501 |
| Oy_n_3tK5LemotSikk  | PIGS      | 94005  | 0.000414221 | 0.005587501 |
| 9eSF3I6KKRD3cOehig  | LOC149134 | 149134 | 0.000414498 | 0.005587501 |
| ipRJRd5N9gdJTutBN4  | CD2       | 914    | 0.000414498 | 0.005587501 |
| 3oLk6h.V3eR1J3x7FM  | MSRB3     | 253827 | 0.000415993 | 0.005604503 |
| BoqNO4vpcfELlG1f8   | PRMT6     | 55170  | 0.000416325 | 0.005605826 |
| TVXshU9wO6l4rQ6iO4  | XRN1      | 54464  | 0.000416602 | 0.005606403 |
| NtzP7AUlhaeruunRI4  | TMEM17    | 200728 | 0.00041699  | 0.005608469 |
| BVBICBBaheh9FNheh8  | PRMT1     | 3276   | 0.000418706 | 0.005628398 |
| EqUSvXcE3tHtHOUpKU  | LYSMD4    | 145748 | 0.000419925 | 0.005641609 |
| f0LQV4ks6o4uOX0IAk  | SERPINB10 | 5273   | 0.0004207   | 0.005648857 |
| uVliKbkKSntCIU71JM  | OGDH      | 4967   | 0.000421309 | 0.005653867 |
| NRcFEbkMC125eedEIU  | TNFRSF13B | 23495  | 0.000421863 | 0.005654962 |
| TldCGoMslCCSCGijis  | C19orf43  | 79002  | 0.000421863 | 0.005654962 |
| 6AdggpSAosojpEvJ6g  | NA        | NA     | 0.000422638 | 0.005659021 |
| Qnr.AmWqwUvoje5brU  | MRPS24    | 64951  | 0.000422638 | 0.005659021 |
| ckhlexDQjRUQgUjITk  | DGKA      | 1606   | 0.000423081 | 0.005661788 |
| KJw_09TFdEO1dgvouU  | ITFG1     | 81533  | 0.000424466 | 0.005669868 |
| iGABMMTP6ua6ROXsNU  | EXO5      | 64789  | 0.000424521 | 0.005669868 |
| fUxQnkgQpk7j4rXnSo  | NA        | NA     | 0.000424521 | 0.005669868 |
| uqdSIKVm3AwJlJko4A  | LIME1     | 54923  | 0.000424632 | 0.005669868 |

|                    |           |           |             |             |
|--------------------|-----------|-----------|-------------|-------------|
| ZTSkSKRZBFF5pB1Xc  | TIMM44    | 10469     | 0.000425241 | 0.005674756 |
| Wmcj_uep4OrS1r9fWQ | KLHL34    | 257240    | 0.000425905 | 0.005674756 |
| fQAXF1FVRB4CR5RKFU | LIMD2     | 80774     | 0.000426016 | 0.005674756 |
| QbnSiZelHleQCegng  | TPM3      | 7170      | 0.000426127 | 0.005674756 |
| ip17519ESF6OVSJct8 | SIRPG     | 55423     | 0.000426182 | 0.005674756 |
| NOLV7khS6kKSepSN0o | FAM168B   | 130074    | 0.000426902 | 0.005681183 |
| ocuFel7ASQuqnikiko | DUSP13    | 51207     | 0.000427179 | 0.005681712 |
| lxqiu6ecnqK46oeXtM | TSTD1     | 100131187 | 0.000427899 | 0.005688128 |
| EkgiAodLu41r9._dIU | DUSP1     | 1843      | 0.000428231 | 0.005689388 |
| HnnDXinrJIORPoJ1RU | NISCH     | 11188     | 0.000429007 | 0.005696529 |
| KRXryplO8CFN_ki9SU | C2orf42   | 54980     | 0.000429671 | 0.005702192 |
| WJF33tXtPVREbXvRdg | VPS18     | 57617     | 0.000430336 | 0.005707848 |
| HdRAsK_lfopTv6t1pQ | PSD4      | 23550     | 0.000430945 | 0.005712765 |
| TS0SU10wxEJIKlpQIE | HIAT1     | 64645     | 0.000432218 | 0.00572648  |
| rqVR5F56SgMDg78eLE | SLC35C2   | 51006     | 0.000433437 | 0.005739447 |
| 9uFi5fug27qOcXjAUo | NA        | NA        | 0.000433769 | 0.005740673 |
| xl54HaKov6ID.ISSd4 | UBE2H     | 7328      | 0.000434821 | 0.00575142  |
| WtJMCj9XfiE9R5X3VA | ATG4C     | 84938     | 0.00043543  | 0.005756299 |
| Elt5ZXKfXh1PL1hH7g | PACSIN1   | 29993     | 0.000436372 | 0.005765562 |
| WodljchUMPLKdeeUA4 | C14orf101 | 54916     | 0.000437313 | 0.005774816 |
| upTx1DzvkbEdPsSm6l | DERL1     | 79139     | 0.000437701 | 0.00577675  |
| 61OpHrdLrqAbXLSgig | CRY1      | 1407      | 0.000439085 | 0.00579183  |
| cVYv_VM0oS6dfdHVf0 | CACTIN    | 58509     | 0.000441079 | 0.005814925 |
| ER7He6kKOrUghVH0pE | TNFSF12   | 8742      | 0.000441799 | 0.005820929 |
| EujpL.ey.6oe6yd_j4 | SMIM14    | 201895    | 0.00044202  | 0.005820929 |
| 6.PHwKxYKCIK5Lp0ZU | TDRD1     | 56165     | 0.00044346  | 0.005836681 |
|                    | PTGES3L-  |           |             |             |
| 9HupjiArrod98ekqUU | AARSD1    | 100885850 | 0.000445011 | 0.005853699 |
| ZVXouLKpT.6u.3FEj4 | TBCEL     | 219899    | 0.000445398 | 0.005853699 |
| xR5R1LXIFFe313kLnQ | PCSK7     | 9159      | 0.00044573  | 0.005853699 |
| HYfQlqcXohLpp884ok | IL32      | 9235      | 0.00044573  | 0.005853699 |
| Zsj56XvsrrKhEjhYXo | GPR56     | 9289      | 0.000448998 | 0.005893376 |
| ZXwAJBOgpSka6dOXsM | QRFPR     | 84109     | 0.000450659 | 0.005911942 |
| ZgcOHlMIISlgeLNdU  | P2RY13    | 53829     | 0.000450991 | 0.005913063 |
| W0x1MRxL57R41e.56c | HECTD1    | 25831     | 0.00045149  | 0.005916359 |
| NE1PefUZOn3lPr3fVU | NGRN      | 51335     | 0.000453096 | 0.005934157 |
| Be0y75.fl7XnC.8fno | COMMD10   | 51397     | 0.000453594 | 0.005937438 |
| fX6U4r_.RCvflWL7ko | SLTM      | 79811     | 0.000454868 | 0.005950858 |
| Nk5OooPTfS3FJVZ7to | CTSL1     | 1514      | 0.000456031 | 0.005962816 |
| Ze.f5SuDv7pOZ57WZU | NA        | NA        | 0.000457913 | 0.005980905 |
| BeXOhvt.V8TI5cR8FI | ATP8B4    | 79895     | 0.000457913 | 0.005980905 |
| xiiK0qcKWqOleSiliQ | TMEM80    | 283232    | 0.000459962 | 0.006003633 |
| KlwSIDXgrHV7_eSDtl | HIGD1A    | 25994     | 0.000460239 | 0.006003633 |

|                     |               |        |             |             |
|---------------------|---------------|--------|-------------|-------------|
| OitKLOAUI6UE6YDXt4  | AOC4          | 90586  | 0.000460405 | 0.006003633 |
| KLiUJIKK6AGhUBVLuU  | GDI1          | 2664   | 0.000461624 | 0.006010426 |
| QOkopobqu25DKnLg8U  | NA            | NA     | 0.000461679 | 0.006010426 |
| 3pT7n6pfT7eenlfff   | DRD3          | 1814   | 0.000461679 | 0.006010426 |
| QKI559XpnnVAj94dN4  | STOML1        | 9399   | 0.000462565 | 0.00601869  |
| uVdCnhV8jpUoOkrnEA  | ARMC7         | 79637  | 0.000462953 | 0.006020463 |
| or1H_pHt.8lhQpE5Ek  | PLXNC1        | 10154  | 0.000463506 | 0.006022566 |
| BKi5A7.pDs9AOel6kU  | TIAL1         | 7073   | 0.000463617 | 0.006022566 |
| WfSqq5bS99DSekRH4   | CYB561        | 1534   | 0.000463894 | 0.006022897 |
| 3VD392eie8.VCCWTZU  | FBXO46        | 23403  | 0.000464282 | 0.006024664 |
| BKn_Vf97C3fqNe7IJ4  | RAB10         | 10890  | 0.00046478  | 0.006026634 |
| QgjcRmnpRTcUQfXxO   | SH3TC1        | 54436  | 0.000465279 | 0.006026634 |
| QfoLvvr5T6_AEwu3ek  | B3GNT5        | 84002  | 0.000465445 | 0.006026634 |
| 3SLoikgFO5Ip6iOee8  | UBASH3A       | 53347  | 0.000465611 | 0.006026634 |
| 9oSChdUIVAo3VLhQKM  | TMEM138       | 51524  | 0.000465888 | 0.006026634 |
| oDtUi1VRyESTHICTSo  | GMIP          | 51291  | 0.000465943 | 0.006026634 |
| Irode6cVTSBCpwq.Oo  | ZNF609        | 23060  | 0.000466275 | 0.006027677 |
| QnO7Uqz51Xi7M4ueLI  | BNIP2         | 663    | 0.000466995 | 0.006033727 |
| inqkT9EzYcXiA_f7tU  | USP15         | 9958   | 0.000468601 | 0.006048981 |
| ZiCpSdZmpNNXFI_Lv8  | C1orf86       | 199990 | 0.000468878 | 0.006048981 |
| uSRREVZV4CiNNJVRD8  | CD180         | 4064   | 0.000468933 | 0.006048981 |
| rVOV9fh8XVReKeH_q8  | SLC25A45      | 283130 | 0.000469376 | 0.006051437 |
| rk5Vjf0RHrhXiloqKI  | ATAD3A        | 55210  | 0.000469986 | 0.006056031 |
| T5il3p_iJdVnuRL3d8  | PDDC1         | 347862 | 0.000470262 | 0.006056341 |
| xXvV9PnuL6i5Pil47U  | SNX30         | 401548 | 0.000473253 | 0.006091578 |
| Q266pfaJDbXr3pjr4g  | GLUL          | 2752   | 0.000473751 | 0.006094718 |
| Ouw0VAFVaXuXv9X3mc  | JMJD7-PLA2G4B | 8681   | 0.000474471 | 0.006098714 |
| rOS96Kell24p5N6QqU  | ANXA11        | 311    | 0.000474582 | 0.006098714 |
| fl07nu53_AoOEkhxAk  |               | 9403   | 0.000474859 | 0.006098714 |
| OfUxPL1RTZOVKhR5ek  | ATXN7L3B      | 552889 | 0.00047508  | 0.006098714 |
| x_qx8ol3_yoe5scrJO0 | CCNT2         | 905    | 0.000475856 | 0.006102127 |
| 9XRKqfeMV0BOiBLCok  | SERP1         | 27230  | 0.000475856 | 0.006102127 |
| ZfYp6V5Skv9Wm.yjew  | PLCH2         | 9651   | 0.000476631 | 0.006108798 |
| fYXGIldklqgnhljFRI4 | NA            | NA     | 0.000477295 | 0.006114044 |
| fpqel96Fen3VR7BI7w  | CHD4          | 1108   | 0.000477683 | 0.006115739 |
| xGX7ueg4q0WjsEeJFE  | ITLN1         | 55600  | 0.00047868  | 0.006122229 |
| rpPv4ntU3Ue81f6v.w  | TIA1          | 7072   | 0.000478846 | 0.006122229 |
| BnqilArpDu7SuHNJX0  | FBLN7         | 129804 | 0.000478957 | 0.006122229 |
| ByecV6BrqSllxygO5I  | ACACB         | 32     | 0.000479566 | 0.006126746 |
| QBBnlu7edxepCdCh1c  | TRAPPC12      | 51112  | 0.000479898 | 0.006127723 |
| 3GcqHr1KIETMUA3ITE  | CISD2         | 493856 | 0.000480341 | 0.006127823 |
| BEglUSegdAkDzrdsiU  | BROX          | 148362 | 0.000480618 | 0.006127823 |
| Bh8SXmPMQo.ETn13rk  | TUBB1         | 81027  | 0.000480673 | 0.006127823 |

|                     |              |           |             |             |
|---------------------|--------------|-----------|-------------|-------------|
| HKtKnpfXe5NHecr6qU  | HYOU1        | 10525     | 0.000482722 | 0.006148106 |
| 6yEdVgt.72TrREeOfI  | CD24         | 100133941 | 0.000482778 | 0.006148106 |
| i4uimBR4lCiesvG_1k  | TCN1         | 6947      | 0.000483276 | 0.006151183 |
| cSjd.VQoVJXZd5iDgQ  | PRCC         | 5546      | 0.000484107 | 0.006158483 |
| uoKzSe6nD5RQ.SXlGM  | AMOT         | 154796    | 0.00048455  | 0.006160847 |
| WVH3uJyTf3fedelR4   | KIAA0226     | 9711      | 0.000485214 | 0.006166023 |
| Z.dK6OllolJiE1WHF4  | STUB1        | 10273     | 0.000487153 | 0.006185979 |
| fQtIhBNftTNQFS79Lk  | SLC25A46     | 91137     | 0.000487817 | 0.006185979 |
| Bk6eL10K0KmlIul87U  | PRPF31       | 26121     | 0.000487983 | 0.006185979 |
| urTU7GAO31TSV_Z69c  | NA           | NA        | 0.00048826  | 0.006185979 |
| 6f6ymG2pl04rSi9CFI  | ZNF626       | 199777    | 0.000488426 | 0.006185979 |
| B44l6gKLu95eVvEuiY  | BRD9         | 65980     | 0.000488426 | 0.006185979 |
| feiVLO57uLyC09_ell  | OPTN         | 10133     | 0.000488592 | 0.006185979 |
| ZgknUITv3gq8WeEKLQ  | NRDE2        | 55051     | 0.000489755 | 0.006197427 |
| i8lcq61QU7jt6JMo5M  | CLK1         | 1195      | 0.000490531 | 0.00620396  |
| 0Ev0FSimgvkuJYhZRM  | LOC100134868 | 100134868 | 0.00049125  | 0.006209786 |
| 39FfvI_SnouQ6RjdJwc | ALG8         | 79053     | 0.000492801 | 0.006226101 |
| fggefiVKKSK_S4kiPs  | PPA2         | 27068     | 0.000493798 | 0.006235406 |
| TONSARjpNGukuRAOI0  | LAMTOR5      | 10542     | 0.000494518 | 0.006241206 |
| oUM.que4xv33FRCiV0  | NFKBID       | 84807     | 0.000495182 | 0.006246302 |
| Tse_fo5pEuvrDoMCjk  | FAM108C1     | 58489     | 0.000495459 | 0.006246505 |
| BCoq3fj1wWVUTHnUWc  | DTX3         | 196403    | 0.00049629  | 0.006253686 |
| o6jlqtl5l3cewDqdXo  | PGAP2        | 27315     | 0.000496899 | 0.00625807  |
| Qp.kqnU6193e46v.kY  | BCAS4        | 55653     | 0.000497951 | 0.006268026 |
| cfmMgheoSKHnt5Xd60  | DEFA3        | 1668      | 0.000498671 | 0.006273791 |
| i0tCqdR4fXKV7D8FLc  | TSPAN31      | 6302      | 0.00049928  | 0.006276951 |
| cXuunVXefdqtS5P_.c  | ABL1         | 25        | 0.000499446 | 0.006276951 |
| uRL1J2q6X1zRUnfSDU  | AP1G2        | 8906      | 0.000500332 | 0.006284789 |
| ckf5JSCCQx8V.tIBdY  | NEDD4        | 4734      | 0.000501606 | 0.006294187 |
| uzciH5dqVdfqgr_bkg  | SPECC1L      | 23384     | 0.000501606 | 0.006294187 |
| 6eoMJ4q54Hvqgq4eyU  | LPGAT1       | 9926      | 0.000502492 | 0.0062994   |
| 6pEunRF7DVJHyoIQtl  | FAM175A      | 84142     | 0.000502547 | 0.0062994   |
| OuX.fqe6np1Xq0Aujs  | NA           | NA        | 0.000504319 | 0.006318307 |
| lt9_dKdeCr4914yOqU  | MPP1         | 4354      | 0.000505482 | 0.006326259 |
| oQkhJAp4qXql6MWH7g  | HINT2        | 84681     | 0.000505482 | 0.006326259 |
| ZS4J4QDQLpUqLt657k  | IMPDH2       | 3615      | 0.000507088 | 0.006341118 |
| HJ7fflWtLIJbHPRBhk  | SON          | 6651      | 0.000507199 | 0.006341118 |
| 9k6p4EceoX5ni4N7vl  | PRPF3        | 9129      | 0.000507864 | 0.006346114 |
| xiUdCQh3n3Ozril_8   | PGM2L1       | 283209    | 0.000509636 | 0.006364937 |
| cdegMBCcPXc5RSdSEs  | CTNNAL1      | 8727      | 0.000510134 | 0.006367288 |
| Zi3epS4MQBNO2INPol  | NA           | NA        | 0.000510356 | 0.006367288 |
| EfQqCs2nBCrgPrjIHU  | POLR2B       | 5431      | 0.000510854 | 0.006368254 |
| Qrf93pb9SkX0W1HdfY  | INTS5        | 80789     | 0.000510965 | 0.006368254 |

|                    |          |           |             |             |
|--------------------|----------|-----------|-------------|-------------|
| fiuenn78T3Xeqdxd1E | ABCC10   | 89845     | 0.000511906 | 0.006375424 |
| lhxfUIFUS5_M.SLS0  | RTN4     | 57142     | 0.000512072 | 0.006375424 |
| 9g9NAMC57aepuunRlw | ZNF394   | 84124     | 0.000512681 | 0.006379135 |
| 0WOoR_qhXijukjutk8 | HSD17B8  | 7923      | 0.000512903 | 0.006379135 |
| u71GIKHOEl6ZBWn32E | COL6A2   | 1292      | 0.000513789 | 0.006386838 |
| 6gFjughViui7p4pXi4 | ATRIP    | 84126     | 0.000515838 | 0.006407723 |
| 6nuQjvcZbRnnfXnXeo | GPR27    | 2850      | 0.000516004 | 0.006407723 |
| rBB5CFQp1Lnh3T6oqY | B3GNT8   | 374907    | 0.000517278 | 0.006420211 |
| 0eVScSlaWA5.R18n_U | RBM15B   | 29890     | 0.000517665 | 0.006421695 |
| ETh0AOJ4gou86Urm0  | ZNF346   | 23567     | 0.000518994 | 0.00643485  |
| oEczTBUiPbVJVltYSE | SAMD4B   | 55095     | 0.000520711 | 0.00645083  |
| uRSc_Xk3qA_eDZEktM | JMJD1C   | 221037    | 0.000520822 | 0.00645083  |
| Hfq3fFmlelpILSVg5c | SHC1     | 6464      | 0.000522372 | 0.006466691 |
| x4OBJA5SCC9SVSdedl | TDG      | 6996      | 0.000523425 | 0.006473711 |
| WqDixOtf11U0uXfdQc | TRIM58   | 25893     | 0.00052348  | 0.006473711 |
| r7fcl_Jd4q0sLgsSMk | LTN1     | 26046     | 0.000523812 | 0.006474477 |
| xOJ.1f5Hg473dbdNpl | TNRC6A   | 27327     | 0.0005242   | 0.006475927 |
| 39eohTVUX91pd4h.i0 | CLUHP3   | 100132341 | 0.000525418 | 0.006487632 |
| x67fHV6CXgOroMmsKc | GATAD2B  | 57459     | 0.000525861 | 0.006489757 |
| xEeALYpQKDqdSEl11o | ILF3-AS1 | 147727    | 0.000527135 | 0.006502126 |
| iEL0uU4LOJckannpKk | PRKCSH   | 5589      | 0.000529018 | 0.006516768 |
| BRdIP19LI0iOXo7pV0 | LY9      | 4063      | 0.000529405 | 0.006516768 |
| x7V.X3NFcT1JN8X0zk | BCL11A   | 53335     | 0.000529461 | 0.006516768 |
| 9iDZ_B4plpxLi6lOZQ | DENND4C  | 55667     | 0.000529571 | 0.006516768 |
| Np36oQpDf56GQvWwVg | ENO3     | 2027      | 0.000529682 | 0.006516768 |
| iKJOykp3SOyukLpEnU | NEURL4   | 84461     | 0.000532451 | 0.006547471 |
| T5_E51IH1ERFU1R6LQ | SH2B2    | 10603     | 0.000533835 | 0.006557763 |
| xdJKfoRema1IRLkhN4 | CD37     | 951       | 0.000533835 | 0.006557763 |
| fwd6e_5MoXELqeq_us | STAG3L3  | 442578    | 0.000534721 | 0.00656528  |
| lAogJ15r2VIBHEZfSI | OGFRL1   | 79627     | 0.000535497 | 0.006568066 |
| QyCF6hloee3ld3rRXk | DEFA1    | 1667      | 0.000535497 | 0.006568066 |
| WigjjkaLi3LHg6h8jo | KBTBD7   | 84078     | 0.00053821  | 0.006595273 |
| isVFaz1wDXACMRfksk | MOSPD2   | 158747    | 0.000538266 | 0.006595273 |
| x90u7ieXKNiiX06C6U | BTN2A1   | 11120     | 0.000538985 | 0.006600717 |
| KPe4TnfifxXL4ExO7l | RBM7     | 10179     | 0.000540038 | 0.006610223 |
| o7piOqRfkag5EPinEk | CNBP     | 7555      | 0.000541533 | 0.006623117 |
| TPeolujqponqv65L9Q | HMHA1    | 23526     | 0.000541699 | 0.006623117 |
| Te4igClKsom5XknoBU | NA       | NA        | 0.00054192  | 0.006623117 |
| QilO7e5O6U5.XIO0LI | INSIG2   | 51141     | 0.000543582 | 0.006635295 |
| xGZnlf2KUuJ0l1Cn8A | KANK2    | 25959     | 0.000543637 | 0.006635295 |
| ot9VR9V1CFe70.rvXo | TGFB3    | 7043      | 0.000543748 | 0.006635295 |
| crnCV3dRDICGIFelxE | SLA2     | 84174     | 0.000544412 | 0.006640021 |
| QZekFCzTFvUeUUAoKs | TMEM126B | 55863     | 0.000547624 | 0.00667375  |

|                     |          |        |             |             |
|---------------------|----------|--------|-------------|-------------|
| ccjgitBJKTqiWLfe50  | NUP188   | 23511  | 0.000547735 | 0.00667375  |
| BldAqwUsruk_D6Uu8k  | STK35    | 140901 | 0.000549064 | 0.006676338 |
| Qe6KfONVIQOLoVK_dQ  | KLHL5    | 51088  | 0.000549064 | 0.006676338 |
| WoxKHU0py76oFJWkl8  | NIPAL3   | 57185  | 0.000549064 | 0.006676338 |
| H5BJV7v05TFeleJh7s  | C2orf50  | 130813 | 0.000549064 | 0.006676338 |
| 0IK1877RTIkECsyp5c  | EIF3J    | 8669   | 0.000549341 | 0.006676338 |
| QUUnSBKFIqOhajhKAHo | NA       | NA     | 0.000550615 | 0.006688424 |
| 3dJTSbUhTXIlf1Q3RI  | MSRB3    | 253827 | 0.000551944 | 0.00669301  |
| fmZyWe2lkolWoN6KpY  | NA       | NA     | 0.000551944 | 0.00669301  |
| xl4XrPIpNoe_n_FKs4  | SNORD7   | 692076 | 0.00055211  | 0.00669301  |
| 6bHjTilenjHQL5Lx8k  | PLA2G4A  | 5321   | 0.00055211  | 0.00669301  |
| 6V6uKf4nh.ljR7qtCA  | HPCAL4   | 51440  | 0.000553882 | 0.006704984 |
| Hnff5d56LWqLpvp5yl  | ASAH1    | 427    | 0.000553882 | 0.006704984 |
| c38h111cVdJBydV7aU  | ZNF668   | 79759  | 0.000553937 | 0.006704984 |
| NnpUIV8gV4uekDdHnU  | GRAP     | 10750  | 0.000554879 | 0.006712987 |
| 9pN1JHikXeHRLx86JE  | RPS6KC1  | 26750  | 0.000555654 | 0.006718973 |
| HkwCWqdeP1K.cAKB4o  | NMNAT3   | 349565 | 0.000556152 | 0.006721606 |
| KCBaBzj_5fXz5dYDP8  | TPTE2P6  | 374491 | 0.000556706 | 0.006724906 |
| 9pU_eGPL3AN89dd91U  | SC5DL    | 6309   | 0.000558367 | 0.006741575 |
| 967INlucuqufddvdN8  | STX10    | 8677   | 0.000559087 | 0.006746866 |
| o3zXleqdcCp7dROhXE  | CDKL1    | 8814   | 0.000560915 | 0.006765444 |
| 9COUpVUrvdKkvfirt58 | BRMS1    | 25855  | 0.000561192 | 0.006765444 |
| 9UJeADqUN7wUXSrdos  | MANEA    | 79694  | 0.000561635 | 0.006767379 |
| lpT7JXe7vRJTxeT1k   | MCTP1    | 79772  | 0.000564016 | 0.006782638 |
| lO0dd56nvT7T57vSoU  | NCALD    | 83988  | 0.000564237 | 0.006782638 |
| cSCZPVCHTSldh4Avdl  | COASY    | 80347  | 0.000564237 | 0.006782638 |
| 3ebvSAX7jt_HvkUp4g  | COMMD8   | 54951  | 0.000564237 | 0.006782638 |
| l6KU4uK4CXjv.VpS74  | VPS33B   | 26276  | 0.000564957 | 0.006782638 |
| 9kpQkqQVRfFhMAk34l  | C19orf48 | 84798  | 0.000564957 | 0.006782638 |
| KZG_akiZCkxFIAZ7Xs  | HNRPD1   | 9987   | 0.000565179 | 0.006782638 |
| QGGImmKO2K9XO1jEU0  | UBA1     | 7317   | 0.000565677 | 0.006782638 |
| TCDJFV9VPIUnyXfdUo  | MAP3K14  | 9020   | 0.000565677 | 0.006782638 |
| 3IK5VLXeP.XU158UXU  | ACIN1    | 22985  | 0.000565733 | 0.006782638 |
| fgx9354iWovtVqUkqM  | SELM     | 140606 | 0.000566342 | 0.006783152 |
| cSg_FUooRSMSh0IXpl  | CATSPER1 | 117144 | 0.000566342 | 0.006783152 |
| Zf5I0U7r4K.y_6ES60  | ANKRD10  | 55608  | 0.000567283 | 0.006788302 |
| W2teeilGrLER2tWE44  | UBE2L6   | 9246   | 0.000567339 | 0.006788302 |
| uJE1eVJJCfNSLgf06k  | HEPACAM2 | 253012 | 0.000567892 | 0.006791536 |
| WpAEZVTeeX.c_V5BtU  | RING1    | 6015   | 0.000568391 | 0.006794104 |
| HW5jeigsIC7.04V0Eg  | TNIK     | 23043  | 0.000569    | 0.006797993 |
| fllXtp6lfoae0v_RM   | CCM2     | 83605  | 0.000569388 | 0.006799233 |
| 6.iKWKauzReK2ovYhw  | ARL16    | 339231 | 0.000569997 | 0.006799728 |
| Nrp5yJ.pV58o8rrXRI  | CRELD1   | 78987  | 0.000569997 | 0.006799728 |

|                     |           |        |             |             |
|---------------------|-----------|--------|-------------|-------------|
| fLpk3adHkF3t0Jj3Xk  | FRMD8     | 83786  | 0.000572101 | 0.006821434 |
| Qe6.xckddKXeYNTTdU  | SFR1      | 119392 | 0.000572599 | 0.00682398  |
| fbXiV885e6yJDkleAl  | VCPIP1    | 80124  | 0.000573984 | 0.006837078 |
| cVF6gF9OXd468eVFfE  | TRANK1    | 9881   | 0.000575922 | 0.006856755 |
| iJ994CDz_X3gO4VULU  | ALDH1A1   | 216    | 0.00057642  | 0.00685928  |
| QRoEUuTkoPToQgnIKQ  | HNMT      | 3176   | 0.000577306 | 0.006866412 |
| 6JfoJKu512u62djFIA  | LOC148413 | 148413 | 0.000578746 | 0.006880121 |
| Zfkrz3bTbtZ.S2Tqeg  | ASNSD1    | 54529  | 0.000580518 | 0.006896317 |
| QLe5eyXThVBUIUpOnA  | TPPP3     | 51673  | 0.000580684 | 0.006896317 |
| 6J0SSMPeI06uKrrk74  | GBAS      | 2631   | 0.000582789 | 0.006917879 |
| ZhXwAhHt0Huu8kUIJ0  | BTG1      | 694    | 0.000583675 | 0.006924965 |
| T1zI9FIMH6i65SAci0  | CNEP1R1   | 255919 | 0.000584505 | 0.006931387 |
| oRj7p_O6QlgFH6d6A0  | ST3GAL6   | 10402  | 0.000585115 | 0.006933715 |
| Z4olc5V4nsFUdShCMk  | MFSD5     | 84975  | 0.000585281 | 0.006933715 |
| 9B3EjpMXuXn3qvoLuE  | DIRC2     | 84925  | 0.000586056 | 0.006936039 |
| HY1EuiFc8HHG_kee7k  | NA        | NA     | 0.000586056 | 0.006936039 |
| HYj1upsoV3iUruozLc  | RAB3IP    | 117177 | 0.000586665 | 0.00693982  |
| WIFOUtFO_PasAFJijk  | NUP50     | 10762  | 0.000587717 | 0.006948835 |
| osSgWiAbVdFU1dJS4Q  | CCDC88B   | 283234 | 0.00058816  | 0.006950642 |
| uAtk0iJ4qwh0rteHVI  | LZIC      | 84328  | 0.000589877 | 0.006967492 |
| iOR_kvDo3nvnou4m6E  | C1orf25   | 147339 | 0.000590375 | 0.006969942 |
| c6fIAuMUIQgSo3K4IQ  | UPF2      | 26019  | 0.000590708 | 0.006970429 |
| KpAc6XupQ9QVHk7978  | HYMAI     | 57061  | 0.000592203 | 0.006984632 |
| 96pV17lCrGzPuCwJdE  | MRPS36    | 92259  | 0.000592701 | 0.006985895 |
| ZeK54aEbbEZie6Hrqq  | PKN1      | 5585   | 0.000592978 | 0.006985895 |
| lp3XLISISISK.EL.ci  | UBE2O     | 63893  | 0.000593477 | 0.006985895 |
| 6euf8DUi6h5eZede80  | SUV420H1  | 51111  | 0.000593477 | 0.006985895 |
| TektVvZNOt1O7FIAtA  | TAF2      | 6873   | 0.000594086 | 0.006988153 |
| 34xhFk6fYh0RnookQU  | RYR1      | 6261   | 0.000594252 | 0.006988153 |
| NluXXu9Suf7kzP93jU  | C1orf52   | 148423 | 0.000595027 | 0.006993837 |
| fVyA8gDQn_pSua6dOU  | LMOD3     | 56203  | 0.000595969 | 0.006998035 |
| u550orVT4jQILAVNVU  | ACOT8     | 10005  | 0.000595969 | 0.006998035 |
| BjOAPp6n66dOXutcnE  | MAGT1     | 84061  | 0.000597464 | 0.007012154 |
| x0jXUVHVU1PGOUUn1Jc | RECQL5    | 9400   | 0.000598239 | 0.007017815 |
| Nhu93rVO3yapOsa.bk  | CARKD     | 55739  | 0.000599347 | 0.007027366 |
| BvlpQQ9yyp kCLnEU   | SLC38A2   | 54407  | 0.000600011 | 0.007031716 |
| 9nRI7DVJH_oJYqo6tM  | CATSPER2  | 117155 | 0.000601562 | 0.00704644  |
| 3df16J6.J6M6iqv6eU  | SMPD1     | 6609   | 0.000601949 | 0.007047331 |
| QipFKRBhNidXJSxeio  | NA        | NA     | 0.000602226 | 0.007047331 |
| xfe6Ujft0FLDrF4oE   | PAG1      | 55824  | 0.000602891 | 0.007050642 |
| fkrKaifV5updP355lg  | C9orf69   | 90120  | 0.000603223 | 0.007050642 |
| BorV5S78giXh7vS5fo  | WFS1      | 7466   | 0.000603555 | 0.007050642 |
| ZdIDrSOtKJSc5JLMU0  | ZDHHC17   | 23390  | 0.000603832 | 0.007050642 |



|                    |           |        |             |             |
|--------------------|-----------|--------|-------------|-------------|
| HP3Sbofd5O2p8q0Ulo | ZADH2     | 284273 | 0.000604275 | 0.007050642 |
| ZiQmZqtf5b6fcucsNM | FEZ1      | 9638   | 0.000604275 | 0.007050642 |
| Tsifky2kdLA7_vX.IU | TOMM20    | 9804   | 0.000604718 | 0.007052376 |
| 3hqUlinEAHBXo1x3fM | RPL18     | 6141   | 0.000606047 | 0.007059961 |
| fVSQO8jLkzNLReQL.c | N4BP2L2   | 10443  | 0.000606269 | 0.007059961 |
| 3RSnk4h4X1pPfHDLf0 | DENND5B   | 160518 | 0.000606601 | 0.007059961 |
| Nt5ZTuiTl.RfWU404o | ABCG1     | 9619   | 0.00060721  | 0.007059961 |
| KkrNJ_d3_R.aoKKHRI | SFMBT1    | 51460  | 0.000607376 | 0.007059961 |
| xnUO7kn_Byp6r7q5d8 | TMEM9B    | 56674  | 0.000607432 | 0.007059961 |
| Kt6AIR6fv6k.dOn1R0 | DBT       | 1629   | 0.000607432 | 0.007059961 |
| xeTSF9fCDgFhROioAI | NUP54     | 53371  | 0.000609425 | 0.007074124 |
| HALNpamR6fGXsNUkf4 | EID2B     | 126272 | 0.000609647 | 0.007074124 |
| frhAHi16oC4etbrllo | SLC29A2   | 3177   | 0.000609979 | 0.007074124 |
| E6tS_PsbJRKJXnOAoM | GATA2     | 2624   | 0.000609979 | 0.007074124 |
| 03_TFU7fVS_1Xov6qg | SEPW1     | 6415   | 0.000610145 | 0.007074124 |
| 0chyh1Ldd1QiECIPk  | POFUT1    | 23509  | 0.000610754 | 0.007074124 |
| 0Ju3s.O7iieen5Lmbk | BCL2L1    | 598    | 0.00061092  | 0.007074124 |
| x_peKJ5e_6lJ59h558 | TEX10     | 54881  | 0.000611253 | 0.007074124 |
| 9iSDdagOHY3pROTJU0 | STAU2     | 27067  | 0.000611308 | 0.007074124 |
| xVcT4delxNJQHwX66o | ARF4      | 378    | 0.000612305 | 0.007082237 |
| TWtddPKuSprcd9Quqg | RASA4CP   | 401331 | 0.000612803 | 0.007084581 |
| 0cT4f7kNXdPOz64HSI | NA        | NA     | 0.000613191 | 0.007085643 |
| K64qdyAUJVOJLlOXY  | PDZD4     | 57595  | 0.000614852 | 0.007099046 |
| Hh4gS3il6dR_gs3quY | C2orf44   | 80304  | 0.000614963 | 0.007099046 |
| 6SJfuohUsglBJNeoDU | USP32     | 84669  | 0.00061524  | 0.007099046 |
| TUoBCPDuJL3UI1weuo | NUS1      | 116150 | 0.000617067 | 0.007116704 |
| Qr.Yl55Z3pg4V_H3jc | FBXL5     | 26234  | 0.000619005 | 0.007135622 |
| fe7icfB4ZXfXUHgo2U | RAB11FIP1 | 80223  | 0.000620445 | 0.007147255 |
| xrR2o3u9g11UVf3_6l | DOLPP1    | 57171  | 0.000620611 | 0.007147255 |
| r9LHsz9Fe7DqIV3X90 | PBX3      | 5090   | 0.000623048 | 0.007168546 |
| Qen_rt.er1_QxUxR9Q | MS4A3     | 932    | 0.000623269 | 0.007168546 |
| HT_qKSngUCrInqwwO0 | TRIM41    | 90933  | 0.00062338  | 0.007168546 |
| BXxyHuOnRF7DVLn_oo | BLOC1S6   | 26258  | 0.000623657 | 0.007168546 |
| ZkrIO3qBKhqonOX.7c | NMT1      | 4836   | 0.000624599 | 0.007173755 |
| xF7FPVH53_MlF1yg6l | ARHGEF12  | 23365  | 0.000624709 | 0.007173755 |
| N1c9sIN1ulDuHFuUkk | ABCD1     | 215    | 0.000625374 | 0.007177945 |
| Bq_QQ_rwH_rMT6CRSo | TMEM19    | 55266  | 0.000626481 | 0.00718388  |
| WkuK2yX.K6CC4q5Ju0 | CAB39     | 51719  | 0.000626758 | 0.00718388  |
| Op77i30kV1TsXzNXd4 | PSMD10    | 5716   | 0.000626814 | 0.00718388  |
| BeVLIoihnlgni7Vil  | ITPK1     | 3705   | 0.00062709  | 0.00718388  |
| igG0si0R.uxKjt8uVI | PRPF38B   | 55119  | 0.000627423 | 0.007184251 |
| ieAgke2dzggSeqZez4 | NA        | NA     | 0.000628586 | 0.007191959 |
| Bf7Xprq77ntVfrvzXk | OR2W3     | 343171 | 0.000628696 | 0.007191959 |

|                    |           |        |             |             |
|--------------------|-----------|--------|-------------|-------------|
| 9YO4_gT_qJFSKj90uo | SLA       | 6503   | 0.000629029 | 0.007192326 |
| 3XeTddKdQV59dJDid0 | ZNF692    | 55657  | 0.000629859 | 0.007198387 |
| xRIDn5JcKsr.SFurVI | ZSCAN18   | 65982  | 0.000632517 | 0.007225318 |
| NcStV3iV3Rfte6CCRI | GNLY      | 10578  | 0.00063512  | 0.007250665 |
| HPbngB6fVXgkV57pFI | ENOX2     | 10495  | 0.000635342 | 0.007250665 |
| 3qXJ0USRNdSjcl9zcU | NME6      | 10201  | 0.000635895 | 0.007253233 |
| 9kAqUtm.c.d2NUp95o | SPECC1L   | 23384  | 0.000636172 | 0.007253233 |
| WSeum6H2OIXgrkkQm4 | C9orf142  | 286257 | 0.000637557 | 0.007265559 |
| TkhNXVDfIREeILB2ic | TCEANC2   | 127428 | 0.000639993 | 0.007289859 |
| 6fvNFPub5REK5Ep6C0 | CPNE8     | 144402 | 0.000641876 | 0.00730783  |
| cd3jnj_R3noPeXJ7nQ | MS4A6A    | 64231  | 0.000642984 | 0.007316962 |
| 6di441O.0mGmwQHqko | MCL1      | 4170   | 0.000644645 | 0.007326686 |
| 3rpw3_Pc7.4116R1IU | NA        | NA     | 0.000644756 | 0.007326686 |
| EgX.UL43NS4bpeupv0 | TMEM158   | 25907  | 0.000644756 | 0.007326686 |
| xkbuzUN5e4Tk.x3_SI | CRLF3     | 51379  | 0.000646639 | 0.007344597 |
| IuIMglUv0p85HxunTk | METTTL21D | 79609  | 0.000647525 | 0.007348949 |
| fXuUwL1g1VO7d.SJ6U | TRAPPC11  | 60684  | 0.000647635 | 0.007348949 |
| 9wXeQpSRUU0cXkXnus | GIT1      | 28964  | 0.000648023 | 0.007349866 |
| QooKh.og6B34ofyUrs | CCDC126   | 90693  | 0.000648854 | 0.007355805 |
| WF5WS_i_h7fBLJukRI | C15orf52  | 388115 | 0.000649795 | 0.007361049 |
| BsgTKHnDdL2d7jtC5I | RAPGEF2   | 9693   | 0.000649961 | 0.007361049 |
| NO6FXqJNLtdN7UOEIc | DUSP18    | 150290 | 0.000650238 | 0.007361049 |
| TtSZNEA6DtL4uSuEko | ARID4B    | 51742  | 0.000652619 | 0.007381029 |
| 6h7xKfJ.u4AUtF.dco | SDCBP     | 6386   | 0.000652619 | 0.007381029 |
| KkeXS301ARf1f5XiF0 | CSRP1     | 1465   | 0.000653395 | 0.007384974 |
| c4F58xcKkokJV0Q5J4 | CREBZF    | 58487  | 0.000653782 | 0.007384974 |
| u1WEUIXHn2GX1cE2II | NA        | NA     | 0.000653893 | 0.007384974 |
| KboBEXE4AkgNr57.n0 | KLF5      | 688    | 0.000654447 | 0.007387745 |
| BgprkrXTrndXT3ee3c | EMP3      | 2014   | 0.000654945 | 0.007389532 |
| frnQR_8eQnF8P1Qi64 | OSBPL11   | 114885 | 0.000655222 | 0.007389532 |
| 67TdlqWqghUeCepKEQ | MPST      | 4357   | 0.00065561  | 0.007390424 |
| NiCtd68t3QPinvyoDU | GNA13     | 10672  | 0.000657603 | 0.00740941  |
| fgCwEDsp6GW6dEXsNU | EGFEM1P   | 93556  | 0.000657991 | 0.007410292 |
| WBRZ5Zdffe0deueR7s | NA        | NA     | 0.000658988 | 0.00741803  |
| KO7npDspZLu95I5Uic | MON1B     | 22879  | 0.000660483 | 0.007431369 |
| Wvnn08vrqIKhE1Hfoo | RAB9A     | 9367   | 0.000661535 | 0.007438089 |
| uqkfDrRfsEv_7B1S44 | PTGER4    | 5734   | 0.000661701 | 0.007438089 |
| 0xUgV0IS0uoWQIXqXc | MB21D1    | 115004 | 0.000662587 | 0.007444555 |
| IUfeKDoXrsER_DO7jk | KLHL2     | 11275  | 0.000665578 | 0.007474648 |
| NZeQ4O6gpfSSidBXz0 | ZNF3      | 7551   | 0.000666353 | 0.007475555 |
| W9EVI6.fgu56tfV3nU | UBE2L3    | 7332   | 0.000666464 | 0.007475555 |
| WRRhV0RdeeW2eU35Vw | MLL4      | 9757   | 0.00066663  | 0.007475555 |
| 68URnXVT1S4In.5JFI | TP53TG1   | 11257  | 0.000666907 | 0.007475555 |

|                     |            |        |             |             |
|---------------------|------------|--------|-------------|-------------|
| Ecd8znoeTOROk4DC0o  | AKAP12     | 9590   | 0.000667516 | 0.007478883 |
| 9oHTIIJV6_3gKzn8dl  | TPM1       | 7168   | 0.000669122 | 0.00748845  |
| WqHs4KvoendGkH7J54  | TRIM23     | 373    | 0.000669343 | 0.00748845  |
| 9OQuVe6ftVBVdJBAnQ  | SIGMAR1    | 10280  | 0.000669343 | 0.00748845  |
| 3LJ1F4IqOgXerSgEno  | C11orf75   | 56935  | 0.00066962  | 0.00748845  |
| EU4osUop8Y4uXoorks  | NHP2       | 55651  | 0.000671171 | 0.007502288 |
| 3wkBdV4Ts1f4VQneXU  | RAB37      | 326624 | 0.000671946 | 0.007503951 |
| x2ROncp9154tet_l7g  | SEMA4F     | 10505  | 0.000671946 | 0.007503951 |
| WRI286dfXVLRJXSgvg  | ATF2       | 1386   | 0.00067322  | 0.007514671 |
| ioucAolCuy64egrhSo  | NA         | NA     | 0.000673607 | 0.007515496 |
| orhSP6Vep7L_eFXtCA  | ACPL2      | 92370  | 0.000675213 | 0.007529906 |
| 66uL9VXXz3teIUakCc  | PFKFB3     | 5209   | 0.000677207 | 0.007542222 |
| InnAvUkACNFImLACnU  | RPL14      | 9045   | 0.000677207 | 0.007542222 |
| Q3iKW7XBeV6ValJxvk  | RAB4B      | 53916  | 0.000677262 | 0.007542222 |
| 6rEOLhYrZR1UlXngu4  | DOCK11     | 139818 | 0.000680142 | 0.007569103 |
| uHJB51CjI44Dvv1H14  | PTPN22     | 26191  | 0.000680308 | 0.007569103 |
| 0q.Ell0Vp_D58S7st0  | TIFA       | 92610  | 0.000682246 | 0.007584854 |
| fSoszfe6.4KK4vezuU  | USP38      | 84640  | 0.000682357 | 0.007584854 |
| 6ep6Huo3jxla4TBEol  | N6AMT2     | 221143 | 0.000684184 | 0.00759996  |
| cnvI0IALn.3U6OKchU  | ABCB10     | 23456  | 0.00068435  | 0.00759996  |
| Zli6yAdd.fTLXSn_vE  | LMBR1      | 64327  | 0.000684683 | 0.007600127 |
| Kd6OKiLrbiet_qRDxU  | PPP1R3F    | 89801  | 0.000685347 | 0.007603979 |
| NwPBcXpSkS6dEXsN0k  | ZNF577     | 84765  | 0.000686787 | 0.007616426 |
| cq5xPR35fkzHsFSveU  | SPRTN      | 83932  | 0.000687618 | 0.007622109 |
| QbiUeZWIE9L3zQIDBU  | LYZ        | 4069   | 0.00068795  | 0.007622265 |
| ZrdJSVyIeffu.u097U  | CAMLG      | 819    | 0.000689057 | 0.007627021 |
| 0J3RdiEXVIVRNv0gZ4  | KRI1       | 65095  | 0.000689168 | 0.007627021 |
| cfeXR9iSH.vdpnXRjo  | DRAM1      | 55332  | 0.000689334 | 0.007627021 |
| Eyeruuk5k7LVJx0go4  | HSD17B7    | 51478  | 0.00069166  | 0.007649222 |
| x0opThxNEIKaT1eUS4  | FAN1       | 22909  | 0.000693543 | 0.007666505 |
| ckVlv.vS3FR3SrBDIO  | LPAR6      | 10161  | 0.000693986 | 0.007667864 |
| f.nKVVolvpWpaX5XPxc | DNM2       | 1785   | 0.000694595 | 0.007668743 |
| TglutWWYJ4in7gMWIo  | NDUFB11    | 54539  | 0.000694706 | 0.007668743 |
| iniqwivsvteuXU0h0   | NDRG2      | 57447  | 0.000696478 | 0.007684763 |
| EEbT6Knmz_wMI450.o  | CHSY1      | 22856  | 0.000700354 | 0.007723977 |
| 6Y6eREkn1_suxkl768  | SNORA70    | 26778  | 0.000700742 | 0.007724696 |
| KoL5XxK6hf_7w3v91U  | ZYG11B     | 79699  | 0.000703345 | 0.00774982  |
| lqeoAM9DB7CVX.o5QE  | PIK3AP1    | 118788 | 0.000704508 | 0.007759065 |
| rEAJNECjrfpTOcqVe4  | ST6GALNAC3 | 256435 | 0.000706169 | 0.007773788 |
| ToJIPCSKI647Z_kERU  | NGLY1      | 55768  | 0.000707221 | 0.007781794 |
| ref_kcVFW7hiMolJh0  | MYO9B      | 4650   | 0.000707775 | 0.007783783 |
| KeeFXj98gM1RMNSfNU  | USP48      | 84196  | 0.000708052 | 0.007783783 |
| KrJSRjtIAORffUjXUU  | STXBP6     | 29091  | 0.000708772 | 0.007788123 |

|                    |          |        |             |             |
|--------------------|----------|--------|-------------|-------------|
| ZylTut6lfUuf6XxlfU | ORAI1    | 84876  | 0.000709879 | 0.007796717 |
| o10FHdcd_l_BcXer6M | BTF3L4   | 91408  | 0.000712814 | 0.00782421  |
| Hfe68EBJ2jU7R_GJBI | DCAF6    | 55827  | 0.000713036 | 0.00782421  |
| 6ce8riotELISls_eio | NDRG3    | 57446  | 0.000713645 | 0.007827309 |
| NESQvLL4l4U4t94d70 | MAP4K5   | 11183  | 0.000714033 | 0.007827976 |
| oCfVU5f5XV.Ee3lptA | LRRC26   | 389816 | 0.000714974 | 0.007830581 |
| 3gr.1Sht07_lfyD6rl | RGS18    | 64407  | 0.000715251 | 0.007830581 |
| fbh9J9GPthWuH1UueA | MILR1    | 284021 | 0.000715251 | 0.007830581 |
| KlLu_qzueR9UqIAXtl | RIC8A    | 60626  | 0.000716469 | 0.007840336 |
| 9pf09n02ULselUV6EU | FICD     | 11153  | 0.000718352 | 0.00785735  |
| 9lCOVOiKcnfiOuiC5c | CENPT    | 80152  | 0.000720235 | 0.007871561 |
| 0ogp2tEp1KTd3VK7.l | IFT27    | 11020  | 0.000720456 | 0.007871561 |
| 3rrB1UF4T6x7kMCEVU | DUS2L    | 54920  | 0.000721176 | 0.007871561 |
| W5VEV1fFddSFPSHeqA | CD4      | 920    | 0.000721896 | 0.007871561 |
| cumUIGBe.BJ7BQ6x40 | MTDH     | 92140  | 0.000721896 | 0.007871561 |
| 3OBvdPBGSixaiV4FIY | OLIG1    | 116448 | 0.000721951 | 0.007871561 |
| cjduCVkkFgRVTVj8hc | RPS26P15 | 644928 | 0.000721951 | 0.007871561 |
| rUVeS3Se.qKeCQinJ8 | NA       | NA     | 0.000724333 | 0.007893931 |
| OpKeK4gjT6L8oPop5I | VHL      | 7428   | 0.000724942 | 0.007894593 |
| xpOfzbun9V30DPDpSs | C4orf29  | 80167  | 0.000725053 | 0.007894593 |
| xqv4loJS_6i3f7xFV0 | LYSMD1   | 388695 | 0.000727821 | 0.007917562 |
| lp_XUf4Xp5N.XSd96s | IGSF9B   | 22997  | 0.000728043 | 0.007917562 |
| Zd5WhXSnu5UhfV5QEg | COL6A2   | 1292   | 0.000728154 | 0.007917562 |
| BSRVF9VBI7Eu97dT2A | GSKIP    | 51527  | 0.000729261 | 0.007926007 |
| idA58qBv0.dPTqgKSU | KDSR     | 2531   | 0.00072987  | 0.00792903  |
| xJ6CCltTXt36mhLsf0 | C5orf15  | 56951  | 0.000731919 | 0.007944084 |
| B7WU60gRcXVevPuKek | MZF1     | 7593   | 0.000731919 | 0.007944084 |
| rADaIk5jp0ZOw1SR.o | NA       | NA     | 0.000734522 | 0.007968097 |
| THwRGKI5RIk26KUXco | MRPL4    | 51073  | 0.000735574 | 0.007968097 |
| ifq.oxXy6jjsDIpycU | PTP4A1   | 7803   | 0.00073563  | 0.007968097 |
| H57JujJ7j64tBbe6cU | ANP32B   | 10541  | 0.000735907 | 0.007968097 |
| QTqiwyhSJrN3pFEcqE | PTPRA    | 5786   | 0.000736183 | 0.007968097 |
| 9_Ska6E56Ezny_vSoU | MIOS     | 54468  | 0.00073635  | 0.007968097 |
| 6WKAX5VTR0k_R8jEg4 | PID1     | 55022  | 0.00073646  | 0.007968097 |
| fgKHd0x636gOH6SXiU | CHDH     | 55349  | 0.00073934  | 0.007992034 |
| BgV6jncPp6_v6P7B1l | RBM18    | 92400  | 0.00073934  | 0.007992034 |
| HXxXftQktCIJfp1e4l | CHI3L2   | 1117   | 0.000740724 | 0.008003387 |
| T.X_W76P1rZp4RdX24 | GNAO1    | 2775   | 0.000741444 | 0.008007554 |
| u65uENQJliGKue7V0A | PIP5K1C  | 23396  | 0.000742386 | 0.008014108 |
| uoAHCVdfRVZEXk1eWg | C16orf13 | 84326  | 0.000744988 | 0.008038582 |
| ol6vQN5N5Tkfv3hfKU | ANXA6    | 309    | 0.00074737  | 0.008060645 |
| WlCoApLruykDOv6T_0 | PPCS     | 79717  | 0.000752852 | 0.008116119 |
| x1QKyvruMv1iwhfChE | MOB1A    | 55233  | 0.000754236 | 0.008123658 |

|                     |               |        |             |             |
|---------------------|---------------|--------|-------------|-------------|
| rROR.u7dd8PgqKnio4  | ABI1          | 10006  | 0.000754402 | 0.008123658 |
| iDVkdd_HepJ.DSvqSU  | ATHL1         | 80162  | 0.000754569 | 0.008123658 |
| cgpJMPb7OKZegg_fYQ  | SKIV2L2       | 23517  | 0.000756119 | 0.008134828 |
| WTeunUe1hyCBLX15J4  | NA            | NA     | 0.000756285 | 0.008134828 |
| ugBJQCApSRReCD46IFY | MAP2K5        | 5607   | 0.000757227 | 0.008141216 |
| Zd6Kx4hKueOoKKol.o  | USF2          | 7392   | 0.000757559 | 0.008141216 |
| 3l9CRAuODh5fQt0IAQ  | GNG10         | 2790   | 0.000760771 | 0.008172067 |
| TBZcYhHQrd0pJ5In0E  | DNAJC25-GNG10 | 552891 | 0.000763484 | 0.008197539 |
| rVX_Dit9Tv4qAt_Rz4  | G3BP2         | 9908   | 0.000764481 | 0.008204564 |
| Bl3rB_quj9fqd3K7Hk  | ZNF275        | 10838  | 0.000767693 | 0.008235344 |
| o7iCnuVO6pZKDVeZvQ  | ANO9          | 338440 | 0.000769188 | 0.00824769  |
| Qx.UJoIo3rBpDmncGk  | HMBS          | 3145   | 0.000770628 | 0.008257118 |
| oV9VFYPf94L56T_rQo  | RNF11         | 26994  | 0.000771182 | 0.008257118 |
| TPVK9eVf6p57h1mFyg  | ALKBH6        | 84964  | 0.000771514 | 0.008257118 |
| 3h6b93SISIVpFJp1QA  | PCDHGB6       | 56100  | 0.000771569 | 0.008257118 |
| BZ9GgOZiOheSuSDkOg  | ING3          | 54556  | 0.000771791 | 0.008257118 |
| TKK_J34kL6h_p6pegg  | ACBD4         | 79777  | 0.000772954 | 0.008265868 |
| K_IZZ5QV9Jea.9dUv0  | IFT52         | 51098  | 0.000774837 | 0.008280386 |
| QUSofik5L6itena.nM  | FBXO38        | 81545  | 0.000775003 | 0.008280386 |
| NqcXeIGngOuVLU0kuM  | PMF1          | 11243  | 0.000775446 | 0.008281425 |
| Qg7RNZUhJ3_OKuOoHg  | CNOT6         | 57472  | 0.000776719 | 0.00828631  |
| Q4ILkOrlK620kIB5lQ  | MIB2          | 142678 | 0.000776719 | 0.00828631  |
| 6V7eMioFXseB.u_Fmk  | SH3BGR2       | 83699  | 0.000776941 | 0.00828631  |
| Kuqzni_uciUqU3oc50  | ENHO          | 375704 | 0.000777439 | 0.008287936 |
| fXnlVdRS5f_SljP_7E  | SNTA1         | 6640   | 0.000778658 | 0.008297231 |
| Bfl.4nfnEtl.nHn8lg  | ADCY3         | 109    | 0.000779433 | 0.008301799 |
| 9d3l4ISgEpULkx2r38  | TSPAN2        | 10100  | 0.000785524 | 0.008361425 |
| rJeefddXkh8lCgdQjk  | SEMA4D        | 10507  | 0.000786078 | 0.008361425 |
| QT9BWop4r5Li6l_xR4  | NUBPL         | 80224  | 0.000786078 | 0.008361425 |
| Th97_OnxJBSx0EJJ4c  | SNX14         | 57231  | 0.000786632 | 0.008362833 |
| WEinrr4jlRpwkXunk8  | AZI1          | 22994  | 0.000786909 | 0.008362833 |
| o_6vkMQHnfhDhz1eEs  | PTPN22        | 26191  | 0.000787961 | 0.008370301 |
| T1Rek_Tbqigfay87hE  | DYNLL1        | 8655   | 0.00078857  | 0.008373059 |
| H5uE6lHcoStNdVi1ec  | FARSA         | 2193   | 0.000790176 | 0.008386394 |
| fXUfe5Cfue0wkiNEIU  | LOC338799     | 338799 | 0.00079073  | 0.008388554 |
| Wf3ftUn3Veql4iFdF8  | CHD4          | 1108   | 0.000791893 | 0.008391709 |
| upUk6dF7Vup7v377.0  | LFNG          | 3955   | 0.000791893 | 0.008391709 |
| EgpGnp0jxQwux4lIXo  | IFT52         | 51098  | 0.000792336 | 0.008391709 |
| i7XkuXqGVbLgi47pUA  | SNHG7         | 84973  | 0.000792668 | 0.008391709 |
| TkydF.cBUvCTolisso  | MTPN          | 136319 | 0.000792779 | 0.008391709 |
| 6oOKEK4x3ie6HgekhE  | RCN1          | 5954   | 0.000796544 | 0.008426466 |
| 9gQLd6tG.5dOBHp5C4  | PRKAG2        | 51422  | 0.000796766 | 0.008426466 |
| x1n.1X6LXpl_klyoa0  | DDT           | 1652   | 0.000798317 | 0.008439139 |

|                    |          |        |             |             |
|--------------------|----------|--------|-------------|-------------|
| xrxZO2euCKK.IEqOxc | FCHO1    | 23149  | 0.000800421 | 0.008456993 |
| T1eXBX9e3ZfoJFTt1c | NA       | NA     | 0.000800809 | 0.008456993 |
| xqgv7FU_Pfrl.qNh6s | RNF19A   | 25897  | 0.000801418 | 0.008456993 |
| KogIndzEf71aie2nro | MAT2B    | 27430  | 0.000801418 | 0.008456993 |
| Tz3T_web9atmUi0.rE | BRPF1    | 7862   | 0.000802581 | 0.008465535 |
| 9XVOS3fb7fwu7l1KTK | CSNK1G3  | 1456   | 0.000804906 | 0.008486331 |
| 39XcUepHiGCdXhJYh4 | HDAC7    | 51564  | 0.000805294 | 0.008486683 |
| cnlfRd6upWKH3KB_w  | RAB28    | 9364   | 0.000808561 | 0.008517368 |
| QDirISfMIOu8qo4k54 | BMP6     | 654    | 0.000809946 | 0.008528201 |
| QZqNfuSolnlepF6RRA | PDE9A    | 5152   | 0.000812548 | 0.008551847 |
| u6BXVx3hVcSEFCRw1U | YDJC     | 150223 | 0.000815705 | 0.008578696 |
| E5Lqh9uopHTp3ercOA | KIAA1683 | 80726  | 0.000815816 | 0.008578696 |
| 96pfRedTUgTSfddfR0 | SIGIRR   | 59307  | 0.000817034 | 0.008587737 |
| oku0HADKANJSm66SFU | TSR1     | 55720  | 0.000818252 | 0.008593583 |
| Newpugyi_dLo_vc77o | UBE2E1   | 7324   | 0.000818308 | 0.008593583 |
| Q5R5_plsArKKJOrug  | EGLN2    | 112398 | 0.000822129 | 0.008629926 |
| ceO2n_o54Le0KDO6FU | AGPS     | 8540   | 0.000824455 | 0.008647343 |
| lrug9PjSge1K.Pnlql | PSMD6    | 9861   | 0.00082451  | 0.008647343 |
| NJZSQTTFdQagXoVepI | DPP7     | 29952  | 0.000825894 | 0.008658072 |
| ESC1yEuE.fDrqLUnTk | PDK4     | 5166   | 0.000827002 | 0.00866589  |
| QXiHpCoop4kgotNOig | ARMC5    | 79798  | 0.00082739  | 0.008666161 |
| ZLhT4A0V03IFF1Tu9I | ATG3     | 64422  | 0.000829106 | 0.008674458 |
| Qoo8cYo44oI4V45Xgo | IPO9     | 55705  | 0.000829162 | 0.008674458 |
| foI3W9Z1SadS7A9V9U | PABPN1   | 8106   | 0.000829383 | 0.008674458 |
| KntX6g6ldIoS59QsTc | STRADB   | 55437  | 0.000829937 | 0.008674458 |
| l1_CQCLARpUmugUIPU | FAF1     | 11124  | 0.000829992 | 0.008674458 |
| 3hEAdZVSXOJNeJVld8 | MEN1     | 4221   | 0.000831709 | 0.008685399 |
| oJMPx_hB9srJfB96UI | SLK      | 9748   | 0.000831764 | 0.008685399 |
| BdxC9OCiYRGVNiKuVQ | ARID5A   | 10865  | 0.000832484 | 0.008689129 |
| 0Lt45pR09p1Ug9ch6s | DAZAP2   | 9802   | 0.000832983 | 0.008690544 |
| Elf03ih.Te5M0aVVkK | DHX38    | 9785   | 0.000834312 | 0.008700621 |
| Nyg4vfNy75KUKDEius | CMPK1    | 51727  | 0.00083481  | 0.00870203  |
| KilQuplwXitKL_IUlw | FAM73A   | 374986 | 0.000835807 | 0.008707728 |
| KF7SH6uJIRLinK15I  | GAS8     | 2622   | 0.000836084 | 0.008707728 |
| Tid4J.g09LrojpfesE | TMEM66   | 51669  | 0.000837579 | 0.008719509 |
| fh61eV018l6l9VlrPA | EDC3     | 80153  | 0.000838465 | 0.008724941 |
| QgqgOig5XXt7tvd7IE | ACAD8    | 27034  | 0.000839517 | 0.008732097 |
| iJl1ECXSUU0_JSamLQ | NA       | NA     | 0.000841843 | 0.008752488 |
| Ef7_Kh281J36yUReQ4 | LPAR1    | 1902   | 0.000845276 | 0.008784372 |
| 99Vf5_kffXnlO4IKO4 | CPSF2    | 53981  | 0.000845719 | 0.008785164 |
| Zc6dXQ30VHKP6veXuk | PDE6B    | 5158   | 0.000847768 | 0.008802631 |
| BUE.uXS6zuSSOCiqUg | ZC3HAV1  | 56829  | 0.000849762 | 0.008816263 |
| iqLR_Of0rw0ic6ucSk | EPSTI1   | 94240  | 0.000849817 | 0.008816263 |

|                     |              |           |             |             |
|---------------------|--------------|-----------|-------------|-------------|
| Wo.SiYo.Sh4pJe4J7s  | NA           | NA        | 0.000850814 | 0.008818019 |
| Ewd5xOneHnuqj4Agzk  | TDRD7        | 23424     | 0.000851036 | 0.008818019 |
| Ouudhh1fRtSIFxN2rg  | AMDHD2       | 51005     | 0.000851091 | 0.008818019 |
| KVTueeLpQjilKeVzEc  | SELO         | 83642     | 0.000851922 | 0.008820717 |
| Tfp3gqfh7EEuo53cxl  | PGM3         | 5238      | 0.000852088 | 0.008820717 |
| rREnB5QDE_FssnvQdc  | ABCC4        | 10257     | 0.000852808 | 0.008824355 |
| ZVOtO4dSMfeqevg5Ls  | ATP5S        | 27109     | 0.000854081 | 0.008833719 |
| TnbnV4kUYpfQsnn4o0  | SPDYE1       | 285955    | 0.000854746 | 0.008834109 |
| rvSXzV_kbASHHlfPso  | IMPA1        | 3612      | 0.000854857 | 0.008834109 |
| iJJ1.oc9eood45Km3s  | DIAPH1       | 1729      | 0.000855521 | 0.008837164 |
| KrSXp.7brp6dowP9UE  | POLR3B       | 55703     | 0.000856463 | 0.008843075 |
| WHefd3tJteedyCHtbo  | CKAP5        | 9793      | 0.000857459 | 0.008849552 |
| opL3unr.rLWp0T3RHk  | NUPL2        | 11097     | 0.00085901  | 0.008861737 |
| fRHj2H97qflo4oiXHo  | CTH          | 1491      | 0.000859397 | 0.008861919 |
| ZVchLf.Lld53S375XI  | CCDC174      | 51244     | 0.000859841 | 0.008862466 |
| cqC.OgDgvpH.cV3ifo  | CCDC132      | 55610     | 0.000860339 | 0.008862466 |
| upM5M15x5J5Fzj681A  | DDX5         | 1655      | 0.00086056  | 0.008862466 |
| IKFdZ7VKXu_nl6KX58  | MEI1         | 150365    | 0.000861834 | 0.008871769 |
| W3nzoL7lfr_vLBRdJQ  | EIF4E3       | 317649    | 0.000862277 | 0.008872516 |
| QXfWv_e89ALqA7F6Rs  | USP48        | 84196     | 0.000862886 | 0.008874972 |
| 9qJfIcqbjiXo7fXgk   | TSG101       | 7251      | 0.000864215 | 0.008882722 |
| WJ1KEyII86dl_AqikY  | SMARCA5      | 8467      | 0.000864381 | 0.008882722 |
| lkuXUQIOBLq3UkXS3A  | MED23        | 9439      | 0.000865157 | 0.008886877 |
| r8Aar9baR66Kq5nvLU  | DAZAP1       | 26528     | 0.000866098 | 0.008892733 |
| OVX7Th3i0bnns_Qbko  | TCFL5        | 10732     | 0.000866818 | 0.008896312 |
| HeDqroXpPzelABKJSI  | PRPS2        | 5634      | 0.000867593 | 0.008900455 |
| fpSuSF_qgh.AUXL3VY  | PTAFR        | 5724      | 0.000869587 | 0.008916017 |
| fV1LrF7R5A5.t3qSho  | LAMB2P1      | 22973     | 0.00087003  | 0.008916017 |
| coi4LcSXlq5Xu7rtI4  | FAM169B      | 283777    | 0.000870473 | 0.008916017 |
| HtcNPoieeASmjdxP3g  | CCT6A        | 908       | 0.000870916 | 0.008916017 |
| NI7pTwolXLo7boVQEk  | PRMT1        | 3276      | 0.000870971 | 0.008916017 |
| B7e01J1zt7zUnULEn4  | CWF19L1      | 55280     | 0.000874571 | 0.008949041 |
| fU0UtF_pJbRcJJT6A   | EDA          | 1896      | 0.0008759   | 0.008958813 |
| 6p7BOVIJ77pYR9BDKg  | ARFGEF1      | 10565     | 0.000877561 | 0.008971975 |
| EjROEOCSM6d1Z69pCU  | PCGF1        | 84759     | 0.000879167 | 0.008977596 |
| rHpApylaJFcpno.6hA  | ANKRD9       | 122416    | 0.000879333 | 0.008977596 |
| ZuKRiiHKkkYuqQeIUUM | LOC100130093 | 100130093 | 0.00087961  | 0.008977596 |
| rJd5BC0rrrTv1fcv_k  | MED20        | 9477      | 0.00087961  | 0.008977596 |
| 3S36lcwqJd5FSaA7xU  | TNPO1        | 3842      | 0.000880385 | 0.008979899 |
| NQHgKQwNc7gToXd1ro  | DHRS9        | 10170     | 0.000880607 | 0.008979899 |
| cevqihSA0rzQx3p4U0  | NA           | NA        | 0.000881659 | 0.008979899 |
| urk.B5.ftU4YT1RTqo  | S100PBP      | 64766     | 0.000882324 | 0.008979899 |
| TqWXGFoGoFCb8OCENO  | LAMTOR2      | 28956     | 0.000882601 | 0.008979899 |

|                     |              |           |             |             |
|---------------------|--------------|-----------|-------------|-------------|
| EMdLDh0Jd6c8ExXL5Q  | NA           | NA        | 0.000882822 | 0.008979899 |
| oqejuuHRF7DdJH_ot4  | LOC100130276 | 100130276 | 0.000882877 | 0.008979899 |
| 6nfeL366cMEtI8q3eU  | SCO1         | 6341      | 0.000883044 | 0.008979899 |
| upd4lOu2Lgiy9_.vEE  | UPF3A        | 65110     | 0.00088321  | 0.008979899 |
| cXoBg.A67QHkiQSp9l  | KIAA1033     | 23325     | 0.000883874 | 0.008982842 |
| IVFdRXSspVLO89f7tQ  | CHMP3        | 51652     | 0.000884705 | 0.008987471 |
| Z5UZO6CcrqHT1w95b4  | MED22        | 6837      | 0.000885092 | 0.008987598 |
| Wk1J1CIVKEqQBhCKN00 | TAF7         | 6879      | 0.000885702 | 0.008989972 |
| HgeOwl3_Xef7TIPCdE  | NA           | NA        | 0.000887308 | 0.009002458 |
| KLUr0lcl6kE6QhXtXM  | DENR         | 8562      | 0.000887917 | 0.009002698 |
| Hb6HREhXsV3aQk30tl  | STXBP1       | 6812      | 0.000888083 | 0.009002698 |
| Z6fdSU_B61RGRVKVRO  | GOLGA1       | 2800      | 0.000888637 | 0.009004501 |
| unlQPe6.q11.QBSQ6U  | ZNF577       | 84765     | 0.000890187 | 0.009016399 |
| cE396RMHt18FHoEvSU  | PPP1R12A     | 4659      | 0.000890796 | 0.009018755 |
| fod7SAqdHjfdyiet7o  | SLFN12       | 55106     | 0.00089434  | 0.00904755  |
| N5PqFLT9cJxM6U34S4  | STK3         | 6788      | 0.000894396 | 0.00904755  |
| NofVooocavoYjOEXCg  | TBCB         | 1155      | 0.000896057 | 0.009060529 |
| igy.q16wEioL6eiill  | AGPAT4-IT1   | 79992     | 0.000897442 | 0.009066873 |
| 0Saeu6knvV5dku16KQ  | PWWP2B       | 170394    | 0.000897442 | 0.009066873 |
| Eoieh2dN735FFNSDIU  | DGCR2        | 9993      | 0.000898937 | 0.00907815  |
| 0WUVK8APfeXSXXi6eo  | ZNF461       | 92283     | 0.000900044 | 0.009083913 |
| cmGvS.l6l7lSj2Es7E  | PDSS1        | 23590     | 0.000900266 | 0.009083913 |
| x77o3dLvwTrl_TOsDk  | HNMT         | 3176      | 0.00090237  | 0.009101312 |
| Z1V914NJKjoKKsqC84  | TBL1XR1      | 79718     | 0.000903478 | 0.009108648 |
| cV5NOh7551e9TOdkN0  | SLC44A1      | 23446     | 0.000904696 | 0.009117093 |
| ZrUrg3bTC43SndEo1o  | GOLGA3       | 2802      | 0.000906302 | 0.009129436 |
| 3XUhN84AMFSpKRJAWk  | SLX4IP       | 128710    | 0.00090669  | 0.009129502 |
| HqNB7GX_s3hTAt.51k  | ZMPSTE24     | 10269     | 0.000908905 | 0.00914796  |
| B3q_pt5KKEX7qE3ihM  | CYTH4        | 27128     | 0.000909791 | 0.00915036  |
| 05B2nveh3ju7oQOqDI  | SMAD3        | 4088      | 0.000909957 | 0.00915036  |
| 9NKdKlikEliQhUqDo   | KIAA0100     | 9703      | 0.000910289 | 0.00915036  |
| NfpRKSt50eQC4UJSSs  | LPGAT1       | 9926      | 0.000911064 | 0.009154312 |
| QZiV67oe63s4Nu7B7o  | DGKQ         | 1609      | 0.00091256  | 0.009165491 |
| 9aX5tJZeVxfXOSfw7U  | TSC22D4      | 81628     | 0.000915716 | 0.009189488 |
| Bnjeko53fQkzUAUjuU  | HEMGN        | 55363     | 0.000915716 | 0.009189488 |
| 90Tctf5.3_7wiofl3s  | RCBTB2       | 1102      | 0.000916325 | 0.00919175  |
| c5LiiDRXnuqvqhR1c   | HKR1         | 284459    | 0.000917876 | 0.00920345  |
| rfzkA6de4qeQnoq65l  | CIC          | 23152     | 0.000919648 | 0.00921736  |
| BlpDqSl5Ax6Rlk8NMQ  | HMGCS1       | 3157      | 0.000920423 | 0.009221272 |
| 9xl9JiBXeVeuipINaA  | SMARCB1      | 6598      | 0.000922251 | 0.009235718 |
| 6z3qeuiBAoe9.KHgH4  | SOX6         | 55553     | 0.000923247 | 0.009241836 |
| 04InoICS0sV1QaVV2A  | VAMP1        | 6843      | 0.000923856 | 0.009243534 |
| xSvqSnu7p2Aap34hng  | CRYBA2       | 1412      | 0.000924189 | 0.009243534 |



|                     |          |        |             |             |
|---------------------|----------|--------|-------------|-------------|
| ifkXu5MB7y24eH67vk  | ADO      | 84890  | 0.000925407 | 0.009251857 |
| fQgAuOWXpIdlINVQYRI | CCDC101  | 112869 | 0.000925795 | 0.009251871 |
| lIIOeA5X3F.q.EIV1E  | CHMP1B   | 57132  | 0.000926847 | 0.009258523 |
| riloS8oqEhJ31.aJek  | POFUT2   | 23275  | 0.000927844 | 0.009264617 |
| EgLJQqh466EdSO6_gk  | NASP     | 4678   | 0.000928785 | 0.009270153 |
| otHlSKx4oAJDOr2kjo  | CSNK1G3  | 1456   | 0.000929948 | 0.009277894 |
| fjuSLvKCE1qeeldqPI  | RNFT2    | 84900  | 0.000930779 | 0.009278452 |
| cU5edXeFSfRdOhBX34  | TUBG2    | 27175  | 0.000930779 | 0.009278452 |
| ufR3XIU19Up1anUw7A  | U2AF1L4  | 199746 | 0.000931222 | 0.009279007 |
| ZveXgTw6QtyB3WDXEk  | CYTIP    | 9595   | 0.000931665 | 0.009279561 |
| E3pRixio3s4RZR0Q7U  | NA       | NA     | 0.000934267 | 0.009297753 |
| x_JQHkCnuunuKEeaq8  | OPRL1    | 4987   | 0.000934267 | 0.009297753 |
| EOuOVSkI2eRnuvui9I  | PRMT7    | 54496  | 0.000935264 | 0.009298288 |
| o2k9ERJel1XmieToZc  | KCNIP3   | 30818  | 0.000935264 | 0.009298288 |
| Worur11BEP595W_314  | GRWD1    | 83743  | 0.000935486 | 0.009298288 |
| uXkXeghPngQP.DknrU  | CHAC2    | 494143 | 0.00093687  | 0.009304312 |
| opXuhQTafdl6fXR9OU  | XKR5     | 389610 | 0.000936981 | 0.009304312 |
| fbqB53X_SVT9UJ3vQs  | PMEPA1   | 56937  | 0.000937479 | 0.009304312 |
| u7WvHH6UUZJfp1xJUA  | RIPK1    | 8737   | 0.000937645 | 0.009304312 |
| xJ7uFqLLR8Fzt1X10U  | SARM1    | 23098  | 0.000941023 | 0.009333945 |
| od9VeHVU_7wgVJBUok  | CD1C     | 911    | 0.000941411 | 0.009333945 |
| BXlqkAjouJRKc.qm64  | GAL3ST4  | 79690  | 0.000941854 | 0.009334454 |
| o4U1KRLp05ew1SB.qI  | KIAA1751 | 85452  | 0.000942242 | 0.009334454 |
| B_nqSLp8Rcw1SQ.qKU  | GNB4     | 59345  | 0.000943681 | 0.009344256 |
| rLu7XeK5_IC7EeSB5U  | FEZ2     | 9637   | 0.000944235 | 0.009344256 |
| IUGCBd9UIK9j4uASH0  | WTAP     | 9589   | 0.000944401 | 0.009344256 |
| 63klSnSUx3xzTKlKpY  | PIGO     | 84720  | 0.000945232 | 0.009344731 |
| 3iVJ0fJSdH_Kk1zARU  | SNAP47   | 116841 | 0.000945232 | 0.009344731 |
| ruQhI6p7.VUXeLL6K0  | MUL1     | 79594  | 0.00094562  | 0.009344731 |
| xJV.X6euOCISLtlslU  | TRPT1    | 83707  | 0.000948278 | 0.009367134 |
| xR4qnllokgghDp4WwU  | CCDC28B  | 79140  | 0.000949219 | 0.009372569 |
| 9x.aSRdfj3S.56KWQU  | PSMA1    | 5682   | 0.000952763 | 0.009403687 |
| xafXuefu0DoF5XcCR8  | CYBRD1   | 79901  | 0.000954923 | 0.009420519 |
| 9xS3tdHlNIHFNe0Uuo  | GSDMB    | 55876  | 0.000955255 | 0.009420519 |
| 91egdDB0.R6d.NiLHI  | MS4A4A   | 51338  | 0.000958578 | 0.009448238 |
| feh8QDlCquHoL7ozSo  | KLF4     | 9314   | 0.000958855 | 0.009448238 |
| Z1J957X3_6IkK4TESI  | STAG3L2  | 442582 | 0.000959852 | 0.009454171 |
| cu6ef6frgle7rl_hNE  | ZDHHC13  | 54503  | 0.000960682 | 0.009458463 |
| E4IJZxp5E57aU4eznc  | OSTCP2   | 646567 | 0.000962565 | 0.009473107 |
| QHdxxEpeMHexin3cFU  | HTR3A    | 3359   | 0.000967383 | 0.009516612 |
| cp6ipNenv0Vuh_B_U8  | BCL2L12  | 83596  | 0.000968657 | 0.00952523  |
| 6VRx9bwV9U_0I7lGrk  | ADCK1    | 57143  | 0.000972699 | 0.009554194 |
| Zf22Sut..n3XEAbB_Q  | SUCLA2   | 8803   | 0.000972921 | 0.009554194 |

|                    |          |           |             |             |
|--------------------|----------|-----------|-------------|-------------|
| Q4kSK70wDqD4tUdrCl | IDI1     | 3422      | 0.000973031 | 0.009554194 |
| ZqJ_CKg7_EtEgr15Jl | NCBP2    | 22916     | 0.000973197 | 0.009554194 |
| xo4OHpOBG3_C_6eII4 | PLOD2    | 5352      | 0.000973973 | 0.009557888 |
| xZdHI8F8HvfXpnACJ4 | GLTP     | 51228     | 0.000976631 | 0.009580048 |
| W5fcHLkIRtxP6glPe4 | HIPK3    | 10114     | 0.000977406 | 0.009583729 |
| QKde_dfREhejlUiQrc | SIRPG    | 55423     | 0.000979843 | 0.009603689 |
| QuynqD354KD6lAXvnk | YIPF4    | 84272     | 0.000982169 | 0.009622548 |
| OusJ6izR3oICwTdSOI | MINPP1   | 9562      | 0.000983276 | 0.00962946  |
| iJl1F6XHe8.UXv6sqU | DHX40    | 79665     | 0.000984107 | 0.009632006 |
| lrdPglBEgfnnu..fS4 | EIF3A    | 8661      | 0.000984937 | 0.009632006 |
| ZkUqmuiKoDqi8e.Dqg | PP14571  | 100130449 | 0.000985048 | 0.009632006 |
| OfdJdTC7upS9lwwNV0 | ZNF517   | 340385    | 0.000985436 | 0.009632006 |
| KG14oS97geDkl6EeI0 | SGK223   | 157285    | 0.000985547 | 0.009632006 |
| lIKTZKHTgjbglp8VIU | THYN1    | 29087     | 0.000986765 | 0.00963998  |
| i.1X2t9RJLPpt.ui_E | OXR1     | 55074     | 0.000990863 | 0.009676067 |
| Bu.09EuinE0JCqk1JU | TTL      | 150465    | 0.000992192 | 0.009683692 |
| uLEi7gp7pQgGSoWd3U | VEPH1    | 79674     | 0.000992856 | 0.009683692 |
| IsTqP04lIopP6NT6IE | SPAG9    | 9043      | 0.000992856 | 0.009683692 |
| 6dU93LHnVcVJLR9S9M | BBS1     | 582       | 0.000997453 | 0.009705944 |
| faAl.sS9eo9EgkcdSI | ZDHHC20  | 253832    | 0.000997619 | 0.009705944 |
| xLx.kjq7Ch06V3iuaY | WDR20    | 91833     | 0.000997785 | 0.009705944 |
| BSIVPcBCpPR3egsk6U | KRIT1    | 889       | 0.000997785 | 0.009705944 |
| fQBeoP6vuzmDv0uXSE | PTGS2    | 5743      | 0.000998505 | 0.009705944 |
| TviuruMt9K5Lm9PRwY | BTBD3    | 22903     | 0.000998505 | 0.009705944 |
| ZKBXf11nSI559PxUoo | CNTNAP1  | 8506      | 0.000998671 | 0.009705944 |
| B_5R5EdQ3q4CFiHwxQ | CD96     | 10225     | 0.000999225 | 0.009705944 |
| WCyEfrf1S_Uk15LXXk | NA       | NA        | 0.000999335 | 0.009705944 |
| B4RV5U.3t.DwUK7yu8 | NA       | NA        | 0.000999557 | 0.009705944 |
| uiErHoj4iS_n3orp1U | DHX16    | 8449      | 0.000999668 | 0.009705944 |
| ctJ1mak01cUj4u.5GQ | NA       | NA        | 0.001       | 0.009705944 |
| orohj4FCCMN1ArUY6k | ANXA3    | 306       | 0.001004486 | 0.009745531 |
| 3ded.cTh6l1fqegg_o | TGM2     | 7052      | 0.001005316 | 0.009749641 |
| 6XqJ.7ILRPXgSjPdEk | DLD      | 1738      | 0.001007144 | 0.009763411 |
| T.qKeK6EjTitKL2IUk | NA       | NA        | 0.001008583 | 0.009773414 |
| Enqfp5QggojATRtTQI | NA       | NA        | 0.001010189 | 0.009785017 |
| NtF0nIRFRHdSTekQwE | ELANE    | 1991      | 0.001012183 | 0.009800365 |
| 66kEOpN9TIFFSkwUvo | CAND2    | 23066     | 0.001013457 | 0.009808732 |
| cFxUnjqr6rn1.SlCnM | PPARD    | 5467      | 0.0010139   | 0.009809057 |
| B95h_3GWelS9ZihNG4 | CAPN10   | 11132     | 0.001014841 | 0.009814201 |
| oqeOni_zvHB_leHr7k | TMEM123  | 114908    | 0.001015561 | 0.009817199 |
| rJMahStxzU6UHelQEU | PPIE     | 10450     | 0.001016225 | 0.009817841 |
| IEyOKQAXmLINjdXROo | TARS2    | 80222     | 0.001016447 | 0.009817841 |
| NFOuGLN3XI5sJ5Htg  | TRAF3IP3 | 80342     | 0.001017388 | 0.009819015 |

|                    |           |        |             |             |
|--------------------|-----------|--------|-------------|-------------|
| 35NTGOkC01UoESKrl4 | NA        | NA     | 0.001017388 | 0.009819015 |
| ZI9JNd9MSyeqAOUg.A | NA        | NA     | 0.00102132  | 0.009852992 |
| KUnCVIVbo9yMj.IpJI | S1PR5     | 53637  | 0.001023646 | 0.009871454 |
| 0IB.jRJ1KFLkp6eV38 | CCDC84    | 338657 | 0.001025418 | 0.009884564 |
| x67SSiBeiojgu6oa0s | TRAPPC10  | 7109   | 0.001026193 | 0.009886749 |
| B795B7kddX66RXOrso | TMEM70    | 54968  | 0.00102647  | 0.009886749 |
| rYXxMoogx_CSznnuul | KCNK1     | 3775   | 0.001027024 | 0.009888107 |
| l1cdFi74lQqqP7IEJU | TRAF1     | 7185   | 0.001027744 | 0.009891062 |
| fSCcSeUrTkYKiRbogg | IGLL1     | 3543   | 0.001029793 | 0.009906801 |
| o1yHgL.6AI5Kt4tKX0 | TRAPPC11  | 60684  | 0.001031454 | 0.0099188   |
| xoPL61ce1VOK_4FXVU | SRRM2     | 23524  | 0.001032617 | 0.009925742 |
| i4Xh5TgLlx5z_p66E4 | LIPN      | 643418 | 0.001033005 | 0.009925742 |
| KqJR0IH0dUHUoFSSA  | HGD       | 3081   | 0.00103666  | 0.009956866 |
| 0SV7u4Nv7hu5A6gKKo | PPP4R1    | 9989   | 0.001037767 | 0.009963509 |
| oIVJ7DyF1Hux8noIE4 | MLLT10    | 8028   | 0.001038376 | 0.009965363 |
| TgLnkISn3woTnllon0 | SYCP2     | 10388  | 0.001039595 | 0.009973059 |
| rrRJfL8ogicNErhR0  | NA        | NA     | 0.001040204 | 0.009974908 |
| x6edx3tVxetFy4yVS4 | SMAGP     | 57228  | 0.001042474 | 0.009990275 |
| BhiueZZ9ehB9h13iCg | CAPS      | 828    | 0.00104264  | 0.009990275 |
| Qk5m2X1mEUlIXHn2GU | NA        | NA     | 0.001044689 | 0.010004557 |
| KhHni6ISJ5qtU3oR8c | ZGPAT     | 84619  | 0.001044966 | 0.010004557 |
| oJhniedelk5FJh9sPQ | METRn     | 79006  | 0.001046517 | 0.010015399 |
| 9SeHSqLEN15QsMgUBU | AZI2      | 64343  | 0.001047181 | 0.010017757 |
| fAx6451ciSilaC54ZI | ANKS1B    | 56899  | 0.001049396 | 0.010034939 |
| ce4DnpP5FxdEi5PuKs | TP53      | 7157   | 0.001050393 | 0.010040463 |
| iaYjeBW3Vq57Ay3jAY | LUC7L     | 55692  | 0.001051501 | 0.010047041 |
| Egs6bqh_6FSKP86RP4 | SPTLC1    | 10558  | 0.001052442 | 0.010052026 |
| o7pBFVJ.p1ANNYrXig | POLD2     | 5425   | 0.001053716 | 0.010056393 |
| Q5CeB9.Od9uUwdpP4U | SESN3     | 143686 | 0.001053937 | 0.010056393 |
| EaK4Ugl3U2vIQp7Cy4 | KIAA1737  | 85457  | 0.001054159 | 0.010056393 |
| fueRH8SSfX9.U6R5cs | AP1S2     | 8905   | 0.001054602 | 0.010056615 |
| o1Jx0opwpKKPn4ISns | C2orf69   | 205327 | 0.001056595 | 0.010071616 |
| NoXN6F3SR7AMv_v_6Q | NIN       | 51199  | 0.001057315 | 0.010074469 |
| rPDSm6_7uXsNUnHYik | NA        | NA     | 0.001058367 | 0.010077005 |
| cpJ7pS4AzqvsS8vXIM | PDIK1L    | 149420 | 0.001058423 | 0.010077005 |
| ICVFFUT6l6edz3sULE | MLEC      | 9761   | 0.001060029 | 0.010083962 |
| EMIQIs68H0ZJ5.5IJE | STRN      | 6801   | 0.00106014  | 0.010083962 |
| 3pKX73R5XcKgrR2kc  | SRXN1     | 140809 | 0.001060416 | 0.010083962 |
| il3dXoTG8kT6T0s_uk | ELMO2     | 63916  | 0.001061358 | 0.010088909 |
| ZUnD6Crimoo2fgXqKY | PIGX      | 54965  | 0.001063628 | 0.010104454 |
| xnVliHI9XEcgtVECn0 | ASB6      | 140459 | 0.00106385  | 0.010104454 |
| cSOTuOOzqsxZfKk.qQ | C1GALT1C1 | 29071  | 0.001064459 | 0.010104454 |
| rOEiPuJbu2CYCepZRs | UBA1      | 7317   | 0.00106468  | 0.010104454 |

|                     |           |        |             |             |
|---------------------|-----------|--------|-------------|-------------|
| 3TT_J5fTHr9dJfX0I4  | SDAD1     | 55153  | 0.001065622 | 0.010109383 |
| fXgCkUX8KIL7qvrCRI  | AFF4      | 27125  | 0.001067671 | 0.010124812 |
| f6hF0IJ_VFdRf5UP0g  | FBXL6     | 26233  | 0.001068335 | 0.010127104 |
| 6pL9BKueekE4Ck46j0  | SRP54     | 6729   | 0.001070052 | 0.010139365 |
| HpXiEbgRdXXOTRAX3U  | CARNS1    | 57571  | 0.001071603 | 0.010150042 |
| IVUBVf_ulE1X4S_SXc  | NUMB      | 8650   | 0.001074039 | 0.0101691   |
| H7_vpl4kUOHkm6Lhkc  | PELI1     | 57162  | 0.001075424 | 0.010170322 |
| ix1KUCgkUiUOgfjpXA  | STAT1     | 6772   | 0.001075534 | 0.010170322 |
| H5zqV5H1.n1170V664  | UBAP2L    | 9898   | 0.001076531 | 0.010170322 |
| ing5LjvNLSpf1_nS_4  | USP14     | 9097   | 0.001076642 | 0.010170322 |
| rooyfiVKL2IXl6kMyY  | BCYRN1    | 618    | 0.001077085 | 0.010170322 |
| 6BM6ESgqgTRHeoe_6o  | NA        | NA     | 0.001077749 | 0.010170322 |
| ZidKL3IUN6kEiIVTd8  | NOL6      | 65083  | 0.001078082 | 0.010170322 |
| oiDbszjgguuiUsdCng  | FAM21C    | 253725 | 0.001078082 | 0.010170322 |
| lHaEP3q64eLFX8uLFU  | SLC35A1   | 10559  | 0.001078359 | 0.010170322 |
| cdfjqToegKNUoMQgpl  | CPVL      | 54504  | 0.001078414 | 0.010170322 |
| lPaGHeFyKO59K1QGvo  | TSPYL2    | 64061  | 0.001079466 | 0.010176239 |
| HYRfeYpeQtRbq74fQA  | RAB12     | 201475 | 0.001085724 | 0.010231203 |
| NS3EtTUChQXI8RN0KA  | SLC35F5   | 80255  | 0.001088327 | 0.010242888 |
| QjtHSUzgoCHUu6OJXo  | LOC284837 | 284837 | 0.001088327 | 0.010242888 |
| cqKk16e.RW6H4H5T6E  | BCL2L12   | 83596  | 0.001088603 | 0.010242888 |
| on1.TSs397pP4gSAUI  | CMPK1     | 51727  | 0.001088825 | 0.010242888 |
| KeISRP7g45_eXIP9Bc  | SLK       | 9748   | 0.001089102 | 0.010242888 |
| B8UCSWrS5fdG_Wz30o  | ITFG2     | 55846  | 0.001091705 | 0.010263337 |
| OKpKj9199_tenVCp94  | GRIPAP1   | 56850  | 0.001094252 | 0.010283249 |
| BFJ_uaMt4cvwoh6WCc  | BTF3      | 689    | 0.001094806 | 0.010284419 |
| H10pNT1DQgOOud5NLo  | HTATIP2   | 10553  | 0.001097298 | 0.010303787 |
| 6oB8uoiwSDl6ll4d4k  | BET1      | 10282  | 0.001098737 | 0.010313264 |
| WkoCCVUsBHCOhdCWHo  | KIAA1468  | 57614  | 0.001100177 | 0.010322734 |
| fuGuHul_CXooe_pOyE  | FBXO31    | 79791  | 0.001102669 | 0.010337086 |
| ZeTrN5HSS.EXnKu9Ao  | SNORA8    | 654320 | 0.001103001 | 0.010337086 |
| 6k.AKlpXv97vAFU.rk  | TMEM183A  | 92703  | 0.001103001 | 0.010337086 |
| rgjyBSHxwUPUVVFBVc  | OLFM4     | 10562  | 0.001103887 | 0.010340931 |
| OfA0I9ZD07L96t96iU  | WRN       | 7486   | 0.001104275 | 0.010340931 |
| NXZ64IVloCqLAH6Pql  | PSEN1     | 5663   | 0.001108428 | 0.010375769 |
| HIC4mKLSAdJR6_X6yk  | RAB28     | 9364   | 0.001110533 | 0.010391406 |
| iJWf1029JY7RRSV854  | TSC1      | 7248   | 0.001111419 | 0.010395636 |
| 6nFOFDt98hvbv9Si7dE | PPP2R3C   | 55012  | 0.001114298 | 0.010418502 |
| QKIRHIT4rMeU3VLTu4  | NHP2      | 55651  | 0.001116956 | 0.01043928  |
| coJ_igJMeiDCcQll6k  | CCDC142   | 84865  | 0.001117676 | 0.010441935 |
| rS90d3wOsXQAnol3eU  | ANKRD12   | 23253  | 0.001118618 | 0.010443101 |
| fbknQoCl4CiV83udKE  | TCL1A     | 8115   | 0.001118673 | 0.010443101 |
| 03JNl0NUINTSQXSFBU  | PCMTD1    | 115294 | 0.001121331 | 0.01046361  |

|                    |          |        |             |             |
|--------------------|----------|--------|-------------|-------------|
| Ou_PeQia_P_j4s17r0 | SCAMP1   | 9522   | 0.001121996 | 0.01046361  |
| T6KW6c6_itJ9KX3oJM | MAP4K1   | 11184  | 0.001122328 | 0.01046361  |
| EA_K6q7SKKQKrVJ5rQ | TRAPPC6A | 79090  | 0.001123159 | 0.01046361  |
| BpKxb3A3gEq4ydAvlM | WIPF1    | 7456   | 0.001123159 | 0.01046361  |
| fHtf9NU75ZwuM.TO7o | MAT2B    | 27430  | 0.001123491 | 0.01046361  |
| luwnu1y9_BL85Lnn_U | PCMT1    | 5110   | 0.0011241   | 0.010465214 |
| fuaP7h95zhef3nqhOk | PLEKHF2  | 79666  | 0.001125595 | 0.010470995 |
| uqdIJ5HKVYtVO7dfg8 | CD6      | 923    | 0.001125595 | 0.010470995 |
| HnqXgLRHE5Hl.qLsDE | PPP1R10  | 5514   | 0.001129306 | 0.010499416 |
| WyM_9RTVXX6V9C6ngk | ZDHC18   | 84243  | 0.001129527 | 0.010499416 |
| x7Ec04FU2pKmWkqcP0 | SSBP4    | 170463 | 0.001131798 | 0.01051644  |
| BdN1wCkixAsJTs3Sgo | CD46     | 4179   | 0.001132351 | 0.010517506 |
| T4Hr0KZtcVLT.fxfMc | PSME3    | 10197  | 0.001133514 | 0.010522719 |
| NU4foznhh7koIAYlLg | LACTB    | 114294 | 0.001133791 | 0.010522719 |
| xT97CkN_kRuqfLpUo  | DNAJB1   | 3337   | 0.001135895 | 0.010535143 |
| OiEd5d66eSJDFQl0.o | FYCO1    | 79443  | 0.001136338 | 0.010535143 |
| u2UUepfv9Zw9SpI9So | NAGLU    | 4669   | 0.001136449 | 0.010535143 |
| QpHkrkpQV.AgWEC0k  | LPIN2    | 9663   | 0.001137889 | 0.01054441  |
| QqUEXo7SeUIUB7UugE | CDK7     | 1022   | 0.001140159 | 0.010558307 |
| iyijZ_Jerlp57ieA6Y | DDX19A   | 55308  | 0.00114027  | 0.010558307 |
| HjL8go5_j7efQlenQA | RAP1GDS1 | 5910   | 0.001140713 | 0.010558328 |
| KqedeJ0u0K49B7LIQ  | C17orf58 | 284018 | 0.001143094 | 0.010576281 |
| Hus080pSeSXfl_F5PU | C10orf32 | 119032 | 0.001143593 | 0.010576309 |
| 6Toh57opnFXroJT4jc | ZNF574   | 64763  | 0.001143981 | 0.010576309 |
| uCCrLAByl_qUpkunRk | RHBDL2   | 54933  | 0.001145476 | 0.010586046 |
| WduNVJUWU6WXEB6540 | NA       | NA     | 0.001149075 | 0.010604993 |
| ZLruZe6xScdCKYKSol | SPN      | 6693   | 0.001149186 | 0.010604993 |
| fHipLXuniqRI_B54HI | TFDP2    | 7029   | 0.001149297 | 0.010604993 |
| 3DPr4OXOztKV7niU4o | PPCS     | 79717  | 0.001149297 | 0.010604993 |
| xu0ihfh6vT.O1ITRV4 | NAA15    | 80155  | 0.001154059 | 0.010644837 |
| iC30SkeTavt6ZX.XUk | SCARB1   | 949    | 0.001155499 | 0.010654015 |
| BNUGkt5TovpLTRrl6Y | EIF2AK1  | 27102  | 0.001157105 | 0.010661636 |
| HURXAEJdJSkFbS3t1M | WNT10A   | 80326  | 0.001157216 | 0.010661636 |
| QOo8nstHnzqCBdl0IU | ZNF18    | 7566   | 0.001158545 | 0.010669777 |
| Q6NBB5x3agh13HRJ4I | REEP5    | 7905   | 0.001160649 | 0.010685049 |
| f_SqViFUU_R1LW0BCA | FLJ38717 | 401261 | 0.001161258 | 0.01068655  |
| NICVK0SN9VYU56g1IA | CD5      | 921    | 0.001163473 | 0.010702823 |
| Z97dNAB4LyeruunTl4 | FKBP14   | 55033  | 0.001169011 | 0.010746529 |
| WpHyEbnvUX1dOe9RdU | KIR2DL3  | 3804   | 0.001169122 | 0.010746529 |
| TCVe4KEEvefqli1TtQ | FDX1L    | 112812 | 0.001171281 | 0.010762252 |
| WHrQ6ufrlMV50Vy3eQ | NAA40    | 79829  | 0.001172278 | 0.010763096 |
| feXQteRt1eoQC_ullw | MOSPD3   | 64598  | 0.001172334 | 0.010763096 |
| uepygliBCQlqnF5Vs  | DEF6     | 50619  | 0.001172721 | 0.010763096 |

|                    |           |        |             |             |
|--------------------|-----------|--------|-------------|-------------|
| Ho4OiKECkn3hEUIUoU | MAP3K6    | 9064   | 0.001173663 | 0.01076761  |
| QVddJcK3FpV0SISx.g | ADIPOR1   | 51094  | 0.001174216 | 0.010768566 |
| 9KKXla6KOq7_E1H7DI | RASGRP2   | 10235  | 0.001175767 | 0.010774412 |
| lv.m6i7uXm6u7m7_r8 | SIAH1     | 6477   | 0.001175988 | 0.010774412 |
| 9VSFdkXvogjnOCHVJU | SYMPK     | 8189   | 0.001176653 | 0.010774412 |
| lulA1ypdBdk14F8k24 | ITIH4     | 3700   | 0.001176653 | 0.010774412 |
| 3BSjjLhjo9dnjhB5I  | SENP6     | 26054  | 0.001177428 | 0.010777391 |
| ZTpWrsiAUJpJRRS778 | CACNA1I   | 8911   | 0.001181139 | 0.010807223 |
| HV5YrnTXgdj73IEQok | GMPPA     | 29926  | 0.001184018 | 0.010829435 |
| NI73QM3vUFHRywrhbo | GUF1      | 60558  | 0.001186898 | 0.010851629 |
| cqzvIAEAKKepOunTI0 | BLZF1     | 8548   | 0.001187562 | 0.010853562 |
| KtnaFShHEv3c5jdSJ0 | PSMB8     | 5696   | 0.001190719 | 0.010874013 |
| xDeJnpVuuKU73TDSnU | LEMD2     | 221496 | 0.001191051 | 0.010874013 |
| 99UqQp43vls8tb.REk | IL32      | 9235   | 0.001191162 | 0.010874013 |
| 0p6J6iK54nBLIBC518 | ADCK3     | 56997  | 0.001193211 | 0.010888568 |
| Eg5j0Rf7ktaN0fppCo | CAT       | 847    | 0.001195204 | 0.010902607 |
| HXrUVKPLhSv9KAo.n0 | NR3C1     | 2908   | 0.001196921 | 0.010909957 |
| foXp7QXX75VR75fiD4 | C1orf50   | 79078  | 0.001196921 | 0.010909957 |
| 3IHUoQr0A68QSXcXtk | CD44      | 960    | 0.001198361 | 0.010914041 |
| ToNcQ1SCmpElKiKoos | LGALS9C   | 654346 | 0.001199025 | 0.010914041 |
| 3V0SVUADeQVL8WtnFM | APOA1BP   | 128240 | 0.001199191 | 0.010914041 |
| TLhfZ1E1YB1Fb1R5Xo | BAD       | 572    | 0.001199191 | 0.010914041 |
| 9fUCFRyDtJ7Hex3Uel | DCP2      | 167227 | 0.001200299 | 0.010919972 |
| Q4j5IHkdS3raQi4h1s | AIRE      | 326    | 0.00120124  | 0.010924387 |
| KTICnp0oqx4fn_H_aQ | PRO0628   | 29053  | 0.001202348 | 0.01093031  |
| ZNn6kovlhSXqQzKgFU | LOC730202 | 730202 | 0.001204674 | 0.010947172 |
| ZwCyxCXyUpGunRI7DU | C7orf55   | 154791 | 0.001205117 | 0.010947172 |
| 0tBGT7X7T_pVid4V24 | BRD3      | 8019   | 0.001210378 | 0.010988999 |
| ORcpneulfkgLcLGvHw | NA        | NA     | 0.001211098 | 0.010988999 |
| xXp5A0ITaS79_J1Syo | CLDN15    | 24146  | 0.001211098 | 0.010988999 |
| QgqHUvICvjeASKqJwk | KLHL6     | 89857  | 0.00121287  | 0.011000911 |
| 3Vjs6AwKV.116eZSwA | MYO18A    | 399687 | 0.001214033 | 0.011007291 |
| WbrbqLsSIFVQrggeC8 | FBL       | 2091   | 0.001214863 | 0.011010655 |
| oqVI7q.nSzyyEK3_9I | C1orf63   | 57035  | 0.001216358 | 0.011020036 |
| fhXuiA9vvVHgOh4ewY | SLC22A4   | 6583   | 0.001217134 | 0.011022891 |
| KXrQlicb_pL3kiKNek | LYPD6B    | 130576 | 0.001223945 | 0.011080389 |
| ftdG9UoqafRX2wUohA | TRIB2     | 28951  | 0.001226659 | 0.011100759 |
| KquSiX96P6O6c6AgRI | COX7A2L   | 9167   | 0.001228874 | 0.011112909 |
| KURKrov3hgrXCou.u0 | EDN1      | 1906   | 0.001228929 | 0.011112909 |
| KXe_L9T9K_6UpOunTk | NA        | NA     | 0.001234688 | 0.011160775 |
| ERl1up1PeyT5Sb3fRs | ZBED1     | 9189   | 0.001237069 | 0.011174867 |
| o7T9_qLJTU0EDNeHnE | LNX2      | 222484 | 0.00123718  | 0.011174867 |
| f4p1dUF41AJS3Si.FU | RNF26     | 79102  | 0.001237679 | 0.011175155 |

|                    |           |        |             |             |
|--------------------|-----------|--------|-------------|-------------|
| BLh5JXohWkU0RUjZnQ | NA        | NA     | 0.001239118 | 0.011183939 |
| EXICsv9_T.ndT0k7u4 | HSPH1     | 10808  | 0.001240004 | 0.011187721 |
| 9hF0pHqEvqT_ilbu4M | CYB561D2  | 11068  | 0.001240946 | 0.011189285 |
| W0tPXVKrVg7756fWwU | DOM3Z     | 1797   | 0.001241112 | 0.011189285 |
| QSoU59Pbp7tVN4qXrM | NICN1     | 84276  | 0.001241832 | 0.011191563 |
| KPqFUxbyV_zsxQR5QI | RHOBTB3   | 22836  | 0.001242939 | 0.011197332 |
| f97jknklqpUXQRdfwk | MOB1A     | 55233  | 0.001243715 | 0.011200104 |
| iaYUGHUQ1yMK435VJ0 | CD37      | 951    | 0.001246594 | 0.011221817 |
| ZVlrpX78S4odpR7t3s | MNT       | 4335   | 0.001247702 | 0.011225114 |
| fnXrfiO33bwosqX.oo | TFRC      | 7037   | 0.001247923 | 0.011225114 |
| 3kE_igB5VTdCQg6b68 | SNX13     | 23161  | 0.001248366 | 0.011225114 |
| TS5N5MgS9fNfpfe.z4 | NCK1      | 4690   | 0.001249474 | 0.011230857 |
| 6UfM8AClp.p6IS6dEU | NA        | NA     | 0.001254735 | 0.011273913 |
| ISnSu0sJSA1KhlTKOk | PELI3     | 246330 | 0.001255455 | 0.011276152 |
| OUZBA4LJUnTUqKmnzQ | MPC1      | 51660  | 0.001257227 | 0.011287836 |
| ZtZL1Sg.tS_M8VwlXs | SERINC5   | 256987 | 0.001259553 | 0.011302235 |
| rsfflKiSR5O7jr7_U0 | PDE4D     | 5144   | 0.001259774 | 0.011302235 |
| rv6F6m3ipVH_oFvgMo | LOC400464 | 400464 | 0.00126354  | 0.01132803  |
| H7loJiJwEhKKKhRHro | IGSF6     | 10261  | 0.001263595 | 0.01132803  |
| 3S7O0ofvTyvpJlqkgo | NA        | NA     | 0.001264315 | 0.011330243 |
| KIJ5RSIcCoKec6KBxl | SRRD      | 402055 | 0.001265976 | 0.011340889 |
| lq43TTpfpurXVO6.wU | LBR       | 3930   | 0.001267859 | 0.01135351  |
| xwpKKvoqerkl6i1jr8 | VAV2      | 7410   | 0.001269244 | 0.011357911 |
| clKU4d.K7s7sX9JNco | BCLAF1    | 9774   | 0.001269299 | 0.011357911 |
| NKhZ_is8gKCaiaiZCM | CDK11A    | 728642 | 0.001271016 | 0.011369025 |
| xjq9LrOJlOljVlyyUs | RAB21     | 23011  | 0.00127312  | 0.011383597 |
| BPTlfhTuvn6IXqt95I | EPB41L5   | 57669  | 0.00127384  | 0.011385784 |
| 67IXdJ.U1UnKCAg6R0 | DIAPH1    | 1729   | 0.001275058 | 0.011392423 |
| cdS1QHDe0r0esTAXco | ASAP2     | 8853   | 0.001275557 | 0.011392626 |
| uTkj_5E7iKu1L_3Lj4 | YWHAQ     | 10971  | 0.001277772 | 0.011406774 |
| ie33iViVdPFLgoTn4o | TFEB      | 7942   | 0.001278547 | 0.011406774 |
| NXQuRd3rwVAd5CAke4 | OSBPL10   | 114884 | 0.001278879 | 0.011406774 |
| BqaNMK0pvYhQzrgFW4 | NA        | NA     | 0.001279045 | 0.011406774 |
| HMDr0a1HpZfu_eiG6o | SLC35C2   | 51006  | 0.001280374 | 0.011412794 |
| T9U13d7opQFB3_UklE | MLEC      | 9761   | 0.001281094 | 0.011412794 |
| BllCzCcMVNKeruunRk | ZNF483    | 158399 | 0.00128115  | 0.011412794 |
| u6HuURFS41NSAQoeSU | DYNLL1    | 8655   | 0.001283808 | 0.011432221 |
| 3sU9Hovny6hu7uHc   | KIAA0430  | 9665   | 0.001284417 | 0.011433395 |
| 36UM.uV3ofyyn_sDul | PCNXL4    | 64430  | 0.001286355 | 0.011446395 |
| OU4fRlTrcg3sV8VEzg | ARL6IP5   | 10550  | 0.00128785  | 0.011451192 |
| 9Sd7jsn.KKR0rtGnlc | ZNF341    | 84905  | 0.00128785  | 0.011451192 |
| 6eIB1AkuTXQ1Et1BBI | UEVLD     | 55293  | 0.001289069 | 0.011457772 |
| KSIE9yTOX.9VS05Hc  | WBP4      | 11193  | 0.001289622 | 0.011458442 |

|                     |          |        |             |             |
|---------------------|----------|--------|-------------|-------------|
| ryp1AF7kPXFllueHV0  | MORC2    | 22880  | 0.00129073  | 0.01146403  |
| 3kq6fMXsNUke6itCGg  | ZNF860   | 344787 | 0.001294329 | 0.01149174  |
| rRcdPMB4RVleUci1pQ  | NUP98    | 4928   | 0.001295769 | 0.011500261 |
| BP.EeqQyHKK3eP3360  | MRPS35   | 60488  | 0.001296821 | 0.01150255  |
| ZVR7oIpS.5dT_RPT9I  | MFN1     | 55669  | 0.001296987 | 0.01150255  |
| EghEiHbF5nv7llnl3o  | STIP1    | 10963  | 0.001297486 | 0.011502711 |
| xSeAuOmJhRYimeehKg  | LRRC45   | 201255 | 0.001299424 | 0.011515632 |
| 611OITc2Wk13QuvF70  | SPCS1    | 28972  | 0.00130618  | 0.011571224 |
| QsQ7zd7qKCikp7rqHo  | SF3B3    | 23450  | 0.001306955 | 0.011573811 |
| r_yPogRTslnHCdFF9U  | TMEM144  | 55314  | 0.001308506 | 0.01158326  |
| o0B7tx6RX1X_zSJL3k  | TOR1AIP2 | 163590 | 0.001309115 | 0.011584372 |
| NjrXpdReV3fV5eNFn8  | ATG16L1  | 55054  | 0.00131277  | 0.011612424 |
| QXa58QSDnlcTbTqy3g  | SLC22A4  | 6583   | 0.00131493  | 0.011627235 |
| rFHkqCU3oh6k14iP9c  | CCDC149  | 91050  | 0.001321907 | 0.01168462  |
| NB8A80N.fg.eMiCwBw  | OGN      | 4969   | 0.001323569 | 0.011691655 |
| B596S6197WXl7vp5Ng  | LST1     | 7940   | 0.001323679 | 0.011691655 |
| rQvx197.i.7JLsVGeo  | ZMYM2    | 7750   | 0.001324787 | 0.011697125 |
| W8fn_kwIOJQ4F3u17o  | ADD3     | 120    | 0.001326116 | 0.011704545 |
| xnlXiClfDUJePscuk0  | PPP1CB   | 5500   | 0.001328663 | 0.011722709 |
| fKaNGK0ojYhRjgFe3c  | ZNF682   | 91120  | 0.001330103 | 0.011726774 |
| xFt6e5xguAECrV0KVY  | APOBEC3F | 200316 | 0.001330103 | 0.011726774 |
| TV3_4c9fJfMj9yx5Uo  | PRMT3    | 10196  | 0.001330934 | 0.01172978  |
| TkFOQCA8P6UpEunTI4  | PPM1K    | 152926 | 0.001333038 | 0.011744005 |
| WFFrHlt.ke0L0k17UU  | ZFPM1    | 161882 | 0.001333813 | 0.011744636 |
| ce6_Epnl djutOCg6TE | ZNRD1    | 30834  | 0.00133409  | 0.011744636 |
| r.dFRPZ4Jjoi2qIJQ   | SULT4A1  | 25830  | 0.001335696 | 0.011751249 |
| 6SUwAoEleHqbrp05e4  | XRCC2    | 7516   | 0.001336028 | 0.011751249 |
| E_qHF3X0UxV6kVXhB8  | PSENN    | 55851  | 0.001336582 | 0.011751249 |
| Ke0eei_UvR3SAAYWEk  | NEDD1    | 121441 | 0.001336804 | 0.011751249 |
| 6faKG5XRv0etR6fiHQ  | GPX3     | 2878   | 0.001337745 | 0.011753819 |
| 07jk11aXl4leOee0iA  | NA       | NA     | 0.001338077 | 0.011753819 |
| ZAf9xXi5iMIGOroliQ  | NA       | NA     | 0.001339129 | 0.011758749 |
| KG7yHnhmrjmB6LeJeU  | SNORD104 | 692227 | 0.001341289 | 0.011772486 |
| Hfd1UUV.RE9eFljVJQ  | EHMT2    | 10919  | 0.001341677 | 0.011772486 |
| 3tAR_4f_fw9Tg715dc  | ACSL4    | 2182   | 0.001346772 | 0.011812862 |
| 3AAXZZogmqHq1VQaGA  | NA       | NA     | 0.00134882  | 0.011826504 |
| 9GoohS1VFSWxSAwKfc  | CD7      | 924    | 0.001349707 | 0.011829942 |
| rRI_pNFNyD9L8Kil5k  | GALK2    | 2585   | 0.001351202 | 0.011838715 |
| lUaXiuv3fiHbx6k0sg  | C3orf14  | 57415  | 0.001352198 | 0.011843117 |
| flQRcc7FKRSgllJ0qU  | ATG9B    | 285973 | 0.001353971 | 0.011854303 |
| l5cXJ5NzDtJ81wp7UY  | MAPK6    | 5597   | 0.001355078 | 0.011858241 |
| KXXaHaHavzNmXR9NUs  | EIF5     | 1983   | 0.00135541  | 0.011858241 |
| iFGqIV01eVe7p5kLPc  | SAMD10   | 140700 | 0.001358179 | 0.011877181 |



|                     |           |    |        |             |             |
|---------------------|-----------|----|--------|-------------|-------------|
| c6Xp4v4x7qj0vymelY  | SPOP      |    | 8405   | 0.001358567 | 0.011877181 |
| QXB8.6bRJ4kW5aiulA  | SBF1      |    | 6305   | 0.001360948 | 0.011893658 |
| HxK5Lp9zv_r454PKi4  | NA        | NA |        | 0.001362609 | 0.011900475 |
| xSiegqyg1QPe_XCkll  | TAPT1-AS1 |    | 202020 | 0.001362776 | 0.011900475 |
| Wt1cRUUpQld7j3iH_Q  | SIGLEC17P |    | 284367 | 0.001363219 | 0.011900475 |
| EOn0QVAe6mfedKi.uk  | DSC2      |    | 1824   | 0.001365821 | 0.011917908 |
| WkKX3dSHNsF65fFC_4  | RHOA      |    | 58480  | 0.001366597 | 0.011917908 |
| Z3tHSez0beJL3ksEXk  | MFF       |    | 56947  | 0.001366763 | 0.011917908 |
| WK0VKJ4Ch4uumClpSA  | TUT1      |    | 64852  | 0.001367206 | 0.011917908 |
| x4d8VJk7fzS7sduGP4  | MTHFD2L   |    | 441024 | 0.001368036 | 0.011920811 |
| 6n8jtLdvFJf_FQcaY   | TCEAL3    |    | 85012  | 0.001369808 | 0.011931912 |
| TSnePcugokveLdSgsk  | PNISR     |    | 25957  | 0.001371525 | 0.011942523 |
| Tc3qoMgJUS33i_5xFA  | ZNF264    |    | 9422   | 0.001372079 | 0.011943003 |
| 0epFCF9XQSKEeJUGi8  | HCFC1R1   |    | 54985  | 0.001373463 | 0.011950707 |
| fUoj4hS7pQTJABW3YY  | RPL37A    |    | 6168   | 0.001373962 | 0.011950707 |
| EXexMxXwgZVdREeVVI  | CXCL14    |    | 9547   | 0.001375512 | 0.011958392 |
| Hqlix51x1KHdECeOJ4  | KDM6A     |    | 7403   | 0.001376232 | 0.011958392 |
| fkuElWICUXcNd7JDBo  | SLC6A9    |    | 6536   | 0.001376343 | 0.011958392 |
| cTSUfu4IjlU4VSOXdU  | PATE1     |    | 160065 | 0.001379001 | 0.011977143 |
| uogP8eC57.XK5x.plk  | C9orf72   |    | 203228 | 0.00138177  | 0.011996842 |
| H6CoeSlgS2JLihHjnk  | PDE7A     |    | 5150   | 0.001382933 | 0.012002588 |
| QV5Q4iXb8XqeQyXALU  | MYO1F     |    | 4542   | 0.001383819 | 0.012005928 |
| flQJu581Cq9Jz14fRo  | MAP6D1    |    | 79929  | 0.001385203 | 0.012013561 |
| Hu5nvXRB8iLA3UnlWo  | CSDE1     |    | 7812   | 0.001385702 | 0.012013561 |
| NpQpu6Pn4lSi9MFJeg  | ZNF669    |    | 79862  | 0.001387529 | 0.012025052 |
| uVJQSC5O1HualLu78Q  | C12orf76  |    | 400073 | 0.001388581 | 0.012029785 |
| NuT5oXAnnpAgpOJEll  | ATP5F1    |    | 515    | 0.00138908  | 0.012029785 |
| HUp9.q_NUXOI0gzs5l  | SNRNP27   |    | 11017  | 0.001393288 | 0.012058474 |
| rUILXyAy6SoErugnTk  | ITGB3     |    | 3690   | 0.001393399 | 0.012058474 |
| xX6fX6VS_ePXUYq6Hc  | DAXX      |    | 1616   | 0.00139423  | 0.012061305 |
| 9e33_XwKhH6U0.8p2A  | FAM122B   |    | 159090 | 0.001395725 | 0.01206988  |
| 9h.oUwVaCUBd7iTRL8  | NA        | NA |        | 0.00139794  | 0.012080263 |
| x7tSnF6e5pEr8lUE4c  | NA        | NA |        | 0.001398383 | 0.012080263 |
| cR9RTs8Qt_FTV7bB1l  | XPR1      |    | 9213   | 0.001398438 | 0.012080263 |
| QLqegAGgmPFVKj3rfo  | SLC22A16  |    | 85413  | 0.001400487 | 0.012093601 |
| rhdeendIRQUlVlEJVIM | SRM       |    | 6723   | 0.001407465 | 0.012149398 |
| EpQlYKFyLQo6N6BM4k  | USP13     |    | 8975   | 0.001407963 | 0.012149398 |
| 6l.js.1XQjzQe7vYS4  | CLIP1     |    | 6249   | 0.00141256  | 0.012184671 |
| QKmfRR6nfXVIVMfft8  | NA        | NA |        | 0.001414498 | 0.012195765 |
| iqe6y6kykmlzUusEvs  | BUD13     |    | 84811  | 0.001415162 | 0.012195765 |
| K9RyL.lDj11eUk1SOU  | RPS6KL1   |    | 83694  | 0.001415661 | 0.012195765 |
| rnX.J5GI7fyuUu45Fo  | EXOC3     |    | 11336  | 0.001415882 | 0.012195765 |
| 0OiSehnjroVeTEb3qQ  | CPNE1     |    | 8904   | 0.00141771  | 0.012203206 |

|                    |          |        |             |             |
|--------------------|----------|--------|-------------|-------------|
| HSnXnfuitENyalCjvE | KLF17    | 128209 | 0.001417765 | 0.012203206 |
| 9ThUcTukXtP6ooc1KQ | ERGIC3   | 51614  | 0.00141998  | 0.012213003 |
| iLb36DFzuSUcVN000U | ITGAV    | 3685   | 0.0014207   | 0.012213003 |
| i_57B8piSKAVfXqXnk | BIN3     | 55909  | 0.001421641 | 0.012213003 |
| 6z95K6PeSq7qluhKeI | FMNL1    | 752    | 0.001421697 | 0.012213003 |
| Ord_.oLhwST.pOICVw | PDCD10   | 11235  | 0.001422306 | 0.012213003 |
| fgxbqfXldFURdCFNUc | CDPF1    | 150383 | 0.001422417 | 0.012213003 |
| ionKKZiSIG7u8ogdp8 | NRDE2    | 55051  | 0.001422472 | 0.012213003 |
| csFdS66CkRTP9d5_v4 | ADCK2    | 90956  | 0.001426238 | 0.01223598  |
| laAtBdHXSR0SRcndSs | AKIRIN1  | 79647  | 0.001426515 | 0.01223598  |
| NUIfA1VJ9QH4pUU3UU | TYK2     | 7297   | 0.001426681 | 0.01223598  |
| T4Ue8_8f4f9IkRX13o | CD44     | 960    | 0.001427345 | 0.012237298 |
| Ncy1OwQCN6C0V13pUY | KIF5C    | 3800   | 0.00142945  | 0.012249894 |
| EZ36jee93UqdSBeMXs | FOXO3    | 2309   | 0.001429837 | 0.012249894 |
| Or_C6LdOF3SDCu0XV4 | ABCC4    | 10257  | 0.001435541 | 0.012293763 |
| No1eK6lHi2qHWgeA9M | ZNF688   | 146542 | 0.001435984 | 0.012293763 |
| xOlnlJUhnnhnuwO5EM | PPP1R13B | 23368  | 0.001436759 | 0.012296005 |
| ZWuWSDjpVDVutSNPzl | FNTA     | 2339   | 0.001442297 | 0.01233899  |
| lo3cy_j_n7Ojc9OlcQ | BTBD1    | 53339  | 0.001443238 | 0.012342635 |
| Kn7e.HJ5ul_hq6eE3s | ETS2     | 2114   | 0.001447004 | 0.012368696 |
| on1f9Xe6S8Y.4fS14g | OSBPL9   | 114883 | 0.001447669 | 0.012368696 |
| 6vS1wCreogUijscrgk | SUMF2    | 25870  | 0.001447835 | 0.012368696 |
| QW6_CSHo._d5V4VftU | PGAP3    | 93210  | 0.001452542 | 0.012404484 |
| BUEfb8dYNKAVKVbPk4 | MNDA     | 4332   | 0.001455864 | 0.012428428 |
| Z0k4rokuFK6JLhShl0 | MGAT1    | 4245   | 0.001456584 | 0.012430143 |
| EcelUYjVALfYV4goio | NSMCE1   | 197370 | 0.00145747  | 0.012433275 |
| WdfIJVFVK._VNdUN0M | CTSW     | 1521   | 0.001461568 | 0.012463795 |
| xknVChEJ76jnH3SfRk | HIRIP3   | 8479   | 0.001463617 | 0.012468707 |
| rnul7DcQOncyYIURol | NPVF     | 64111  | 0.001463839 | 0.012468707 |
| r6q6edenDnzyAO121U | RBKS     | 64080  | 0.001464116 | 0.012468707 |
| xreS6Je9l3DJS.Ekfk | ZFYVE21  | 79038  | 0.001464226 | 0.012468707 |
| oi5F3_HK1SjVftXoso | OXSRI    | 9943   | 0.001465168 | 0.01247229  |
| ulQV9XRfpFIRUofPwE | ITGA5    | 3678   | 0.001466497 | 0.012479169 |
| u_S66PiC1L_PO_oSHk | TMEM135  | 65084  | 0.001467992 | 0.012487456 |
| xRK6AUk2KkU9X0kJew | INTS4    | 92105  | 0.001469321 | 0.012494324 |
| QXUo6y6RXSJVN9JO94 | PRRC2B   | 84726  | 0.001470484 | 0.012498165 |
| 3EoJAcJVZ7DgEX3eiU | GZMB     | 3002   | 0.001470816 | 0.012498165 |
| u3kBCu2W1A7HtekyIk | NA       | NA     | 0.001472311 | 0.012506434 |
| N6do10uXu37QJrlZSE | PORCN    | 64840  | 0.001473696 | 0.012513756 |
| cUaqUEfoTu1e8XiDhl | YME1L1   | 10730  | 0.001474527 | 0.012516373 |
| ri.uJaEeFFJoFfJFRM | ITGB4    | 3691   | 0.001477849 | 0.012540133 |
| 6.oeiCoppqYJkbYmqg | PAIP2    | 51247  | 0.001478791 | 0.012540646 |
| fnkUDT0mUXR5QtE6Go | TNFAIP8  | 25816  | 0.001478957 | 0.012540646 |

|                    |          |        |             |             |
|--------------------|----------|--------|-------------|-------------|
| KqvCvTiBToCO63iOrk | CYTIP    | 9595   | 0.001480175 | 0.012546536 |
| r44IB73jpef97X.XHk | PPM1B    | 5495   | 0.001483331 | 0.012565806 |
| QidZ3whGLeWGdWlgwA | NA       | NA     | 0.001483498 | 0.012565806 |
| Q0RJyt.OguugPpJ6rE | BTBD10   | 84280  | 0.001484051 | 0.012566054 |
| E5ehKBUg6qfahEldeg | C16orf13 | 84326  | 0.001485214 | 0.012568001 |
| xk6Coy.p1fopzsp_1Y | TXNRD1   | 7296   | 0.001486765 | 0.012568001 |
| fvoljpkju7SCojRrul | KAT6A    | 7994   | 0.001487097 | 0.012568001 |
| 6X_V917NURRRNQXX5c | RNF123   | 63891  | 0.001487374 | 0.012568001 |
| uioikXngV7ffhNRQJE | ZFP82    | 284406 | 0.001487429 | 0.012568001 |
| Tr_R9ef.KXowSzRTU  | SMG1     | 23049  | 0.001487429 | 0.012568001 |
| rRXvfV6zvpD1eZOclA | NA       | NA     | 0.001489921 | 0.012580423 |
| HvXXhL_O7U96l3S58k | TRAF3IP2 | 10758  | 0.00149042  | 0.012580423 |
| uBEr6SILdpLYiUIDI4 | LRRC14   | 9684   | 0.001490475 | 0.012580423 |
| f5516boB8LiFFAxPrU | PRPS2    | 5634   | 0.001496567 | 0.01262739  |
| rIBUJ112gWdFyJSFBs | MEN1     | 4221   | 0.001497287 | 0.012629015 |
| 3ukv9wB4QUrQFAvzuU | PTBP2    | 58155  | 0.001500166 | 0.01264885  |
| BoRmitKWuCmkoJ6JGM | WDR45    | 11152  | 0.001501052 | 0.012651867 |
| rESKC_nlpa1fX6lXdM | FLT3LG   | 2323   | 0.00150216  | 0.012656749 |
| 0YCed9DiglOqCsjn0U | TCP11L2  | 255394 | 0.001502769 | 0.012657429 |
| WTiixSinxi5eiiuS0  | NHP2     | 55651  | 0.001506368 | 0.012683287 |
| lKdKj.P0uB56B0ROV4 | MS4A3    | 932    | 0.001508473 | 0.012696543 |
| 3ZQr7JOpL9L9Jclh64 | OPHN1    | 4983   | 0.001513789 | 0.012736813 |
| 9pf6IHvSrHhTS7STyo | TMED2    | 10959  | 0.001515395 | 0.012745848 |
| 3UdTfQFV0X9U1x15Tk | MLF2     | 8079   | 0.001516447 | 0.01274686  |
| TB_Eot5cQ7CHlx4ICQ | C6orf120 | 387263 | 0.001516724 | 0.01274686  |
| Zn3zXxHVUIUiAeUTEU | NONO     | 4841   | 0.001517112 | 0.01274686  |
| rkknUtdEUIctEpCJCA | KRTCAP2  | 200185 | 0.001518828 | 0.012756809 |
| ZriSHwVdbl0n.1USEU | LSM11    | 134353 | 0.00152049  | 0.012763848 |
| NqRy5yyM8cV14oDSA4 | FBXL3    | 26224  | 0.001520766 | 0.012763848 |
| BpQjRIHE9SepBEkl4  | MBTD1    | 54799  | 0.001521265 | 0.012763848 |
| rJqqQJVV9JX9RB.JM  | FOXI3    | 344167 | 0.00152348  | 0.012774293 |
| WfYiyV7ftV1xVSPJFE | SMYD5    | 10322  | 0.001524144 | 0.012774293 |
| TjgZxYT8o93vjhfo54 | MMADHC   | 27249  | 0.001524311 | 0.012774293 |
| xgOfiXqA6K_S4liPmU | PNPT1    | 87178  | 0.001524643 | 0.012774293 |
| E19pErUQqoNFSi6Pos | PLXNA4   | 91584  | 0.001527024 | 0.012787618 |
| KhQovTfdlXntQXkdm4 | NA       | NA     | 0.001527301 | 0.012787618 |
| ozXUddnpRTXnlQSCCc | TMEM50B  | 757    | 0.001529128 | 0.012797219 |
| NYWmkKVYoJJ6UUKaVk | HIST2H3C | 126961 | 0.001529516 | 0.012797219 |
| TrTXqIKAvoTXgCLE5U | CASP8    | 841    | 0.001530291 | 0.012799235 |
| cKn7ebP6J4p4p6fXlc | PPCDC    | 60490  | 0.001532617 | 0.012810668 |
| QqOEAK75n_TSQpPh94 | EOGT     | 285203 | 0.001532728 | 0.012810668 |
| uvG555UHfX_0Xcpz1E | C12orf4  | 57102  | 0.001536715 | 0.012839513 |
| iqkpERF1ZSdQ.5H.1c | PDRG1    | 81572  | 0.001537823 | 0.012844287 |

|                    |           |        |             |             |
|--------------------|-----------|--------|-------------|-------------|
| Bk9InECgygLKsu_j3o | FAM72D    | 728833 | 0.001539262 | 0.01284932  |
| iWI05R5FUkXpxlulf4 | FAM153B   | 202134 | 0.001539761 | 0.01284932  |
| K2ARLopZJLSqT3gkLs | NA        | NA     | 0.001540591 | 0.01284932  |
| B4q8hqgh6SopGSse4A | MEPCE     | 56257  | 0.001540591 | 0.01284932  |
| Z9DIgnuuAROKAeSepE | CAMK1     | 8536   | 0.001541256 | 0.01284932  |
| r75fUA54ow7Ox67Shc | GAB1      | 2549   | 0.001541644 | 0.01284932  |
| 9vxM7QewSytUDqVPVc | ZNF518A   | 9849   | 0.001542751 | 0.012852376 |
| oXgqduSGxKajfeguIM | LINC00623 | 728855 | 0.001543083 | 0.012852376 |
| QlPftT78D.p6OUBXqE | DHX36     | 170506 | 0.00154408  | 0.012856208 |
| Q7qu6noJHp1esqEMCs | TSSC4     | 10078  | 0.001547403 | 0.012879396 |
| rm2_tPoJ3QSo.rlB6l | RABL3     | 285282 | 0.001548621 | 0.012881967 |
| TZQKi_ha8CAGOI2Kek | FAHD1     | 81889  | 0.001548787 | 0.012881967 |
| BE4nSJxVEX2h5dpVRI | EVA1B     | 55194  | 0.001549895 | 0.012886705 |
| fUpHTp93p69H3V6dlQ | PARVB     | 29780  | 0.00155139  | 0.012889199 |
| 3dnuL.auplZHvg3rJQ | SAFB2     | 9667   | 0.001552165 | 0.012889199 |
| 6Uup3plzp3u7nn.hEA | MAPK14    | 1432   | 0.001552498 | 0.012889199 |
| rpOaifenfvWQKIHLJl | PKP1      | 5317   | 0.001552885 | 0.012889199 |
| ilEApPd7XFye0fd7kk | TLR2      | 7097   | 0.001552885 | 0.012889199 |
| xuXtTB7gs8JHypSOR4 | RSBN1L    | 222194 | 0.001554325 | 0.012896681 |
| E0S1flzu6SLtUll7uU | CD84      | 8832   | 0.001555266 | 0.012900024 |
| fr_qxP16eXJ.jen9yU | NA        | NA     | 0.001558257 | 0.012909702 |
| xws9e3UChad1OnXmXY | SF3B5     | 83443  | 0.001558423 | 0.012909702 |
| WiT6CqzSIU7L0H9R0A | SOAT1     | 6646   | 0.001558478 | 0.012909702 |
| rKiVwgB34srSmS6dOU | OR1J1     | 347168 | 0.001558589 | 0.012909702 |
| QiuiewMexAlKTrpM5c | ZNF485    | 220992 | 0.00155942  | 0.012912118 |
| 6Np9dF2p6K9uSNCiOs | MRPL41    | 64975  | 0.001563961 | 0.012945242 |
| imHaliqShsmJZ0b3Xc | FBXW8     | 26259  | 0.001568391 | 0.012974779 |
| uy1Mm10X1UJRE111TU | FBXO2     | 26232  | 0.001568612 | 0.012974779 |
| usUhcLhCleguvqeirk | DGKA      | 1606   | 0.001571769 | 0.012991915 |
| c82nKbrk5ew3aCnik  | MBD4      | 8930   | 0.001571769 | 0.012991915 |
| xd.0ilkq6uOiCniBf0 | SLC38A7   | 55238  | 0.001574316 | 0.013008482 |
| 0bMAcJ7lUFGeFO00oU | SIGLEC16  | 400709 | 0.001575424 | 0.013013145 |
| rt_.0AujoH6eruunRk | HNRNPU    | 3192   | 0.001576587 | 0.013017061 |
| QruukZN7L1JzEoK4pl | GALNT3    | 2591   | 0.001577528 | 0.013017061 |
| 6oXiEe6e3DsNfwA93k | ATP11B    | 23200  | 0.001577528 | 0.013017061 |
| Erh4pNPIKVIY.Uc9Ek | GNG2      | 54331  | 0.001579743 | 0.01303085  |
| Talkqt.eRfTXwztEv4 | NFATC3    | 4775   | 0.001581349 | 0.013039228 |
| QxeSeVSihijvSOiQs  | GPR108    | 56927  | 0.001581847 | 0.013039228 |
| TUCU6iq7XXSFOVUjj8 | BTBD2     | 55643  | 0.001586665 | 0.013074442 |
| lftf4jn6UwSrUxE33o | CCDC41    | 51134  | 0.001587551 | 0.013074574 |
| 36l80R6MOHuC54UR0U | PIPSL     | 266971 | 0.001587773 | 0.013074574 |
| 04RV5U.3t.DwUK7yu4 | SRP9      | 6726   | 0.0015932   | 0.013114754 |
| 0SpIF3ghlHXUJfRXug | ADA       | 100    | 0.001598239 | 0.013144094 |

|                     |          |        |             |             |
|---------------------|----------|--------|-------------|-------------|
| NRfUEpXehAxCPSmNhk  | ATP5S    | 27109  | 0.00159835  | 0.013144094 |
| EqRmeR1sHQTpOX93Ww  | CYFIP1   | 23191  | 0.001598737 | 0.013144094 |
| Kgio3kLkq768C_xdUI  | EBF1     | 1879   | 0.001598959 | 0.013144094 |
| c1XXqtNXUd4d4c6SSA  | DHRS11   | 79154  | 0.001599679 | 0.013145501 |
| Z_jCSSxSf0.sEt7pPo  | PTBP3    | 9991   | 0.001603112 | 0.013168354 |
| Tpzgse6SJ57.eCuIJQ  | KIAA1737 | 85457  | 0.001603832 | 0.013168354 |
| iV09_LoiEigkBlCiX0  | AGFG1    | 3267   | 0.001604109 | 0.013168354 |
| 6qyJeQhelX1D564ro4  | RMDN3    | 55177  | 0.00160494  | 0.01317066  |
| c1KJIWy15K5pVHSGUI  | NA       | NA     | 0.001605493 | 0.013170692 |
| cJhQLeBAuPrF2_3jkU  | SNORD4A  | 26773  | 0.001607542 | 0.013182986 |
| TofSgA0FSRSScUFFPU  | ZFP36L2  | 678    | 0.001608318 | 0.01318483  |
| oKtUJLUiCO3u6f1dXk  | UBQLN4   | 56893  | 0.001610643 | 0.01319938  |
| o5FUQ7ead99abtqf40  | AP2A2    | 161    | 0.001619891 | 0.013267905 |
| cAoqNe1Cl5jxNai_ZQ  | USF2     | 7392   | 0.001620113 | 0.013267905 |
| NpZXkX0mj_qPkD.ySE  | HAGH     | 3029   | 0.001623048 | 0.013287398 |
| rgE06QVclMhww7vp4o  | TROVE2   | 6738   | 0.001626204 | 0.013308691 |
| Eir7W41EKTyJOrpOIA  | LYZ      | 4069   | 0.001630801 | 0.013341748 |
| uY4uasoluK593nuEBg  | C17orf70 | 80233  | 0.001631631 | 0.013343987 |
| 6SUT9IXniHni4oOkul  | C21orf33 | 8209   | 0.001634013 | 0.0133589   |
| ilKbjruRey1_cdiCel  | NA       | NA     | 0.001636228 | 0.013368337 |
| 3Onu69aueue6C6Q6SA  | NA       | NA     | 0.001636283 | 0.013368337 |
| 6QjqQdl6JJ8t0S.n7c  | KLHL7    | 55975  | 0.001637501 | 0.013371884 |
| OfqCeKyij5_JU4LSnk  | SMCR5    | 140771 | 0.001637834 | 0.013371884 |
| BXin15_IF5VejforR8Q | TBC1D13  | 54662  | 0.001639827 | 0.013383599 |
| xAOqE6UnhoQeLdaVFw  | SLC25A29 | 123096 | 0.00164315  | 0.013401491 |
| Ke0X111R97Ndljnm6M  | BTBD11   | 121551 | 0.001643482 | 0.013401491 |
| IJ3ghEkVJfdkUICXwc  | MOV10    | 4343   | 0.001644036 | 0.013401491 |
| I5x1qJROuJuhSpKCVs  | ATG16L2  | 89849  | 0.001644257 | 0.013401491 |
| TI5771E3b578T1.uiU  | PRKRIR   | 5612   | 0.001646029 | 0.01340356  |
| 66VUIKiEveeCB2B6Mc  | RPL13P5  | 283345 | 0.001646085 | 0.01340356  |
| Hei.iFJeJBOuIVTdxA  | BLZF1    | 8548   | 0.001646306 | 0.01340356  |
| oy7ro9Uep3rX1fo1bQ  | AGPAT5   | 55326  | 0.001646749 | 0.01340356  |
| WVQoz9XBdHS0T7KJS4  | PDCD7    | 10081  | 0.001647525 | 0.013405315 |
| od8q77LJ4BOiObj7Tk  | BMPR2    | 659    | 0.001655942 | 0.013469229 |
| QUJ4KI_po.iVdUiOkM  | ETFB     | 2109   | 0.001657326 | 0.013471791 |
| HDyWpuukp12op4pIAM  | NA       | NA     | 0.001657382 | 0.013471791 |
| x_JRky7RkXuNUnHyis  | CCNB1IP1 | 57820  | 0.001661812 | 0.013501789 |
| 9nrpIPpFPFSt4eFFLQ  | ACAP2    | 23527  | 0.0016622   | 0.013501789 |
| 66mjR_KUovYhS3pcE4  | NA       | NA     | 0.001663086 | 0.013504407 |
| HU6l.0SqESn3wBBWn0  | GBP4     | 115361 | 0.001666464 | 0.013527251 |
| clSk4nFOJ6OJp_AOFU  | NPRL2    | 10641  | 0.001670174 | 0.013552776 |
| B6kued8DXF9R0HVMQc  | CD302    | 9936   | 0.001671891 | 0.013559766 |
| oc74ZyXkSEfq3OIkS4  | OR2L2    | 26246  | 0.001672167 | 0.013559766 |

|                    |          |        |             |             |
|--------------------|----------|--------|-------------|-------------|
| i6RUSQkvl8UuACuR4o | ENOPH1   | 58478  | 0.001674493 | 0.013574031 |
| N_IpYp6StH4pSi9CFI | GSTTP2   | 653399 | 0.001675435 | 0.013577068 |
| xFvuS6rcU5D.f0keFU | TMEM165  | 55858  | 0.00167765  | 0.013586723 |
| QS50.4jFec2OtnEBSg | MS4A7    | 58475  | 0.001677761 | 0.013586723 |
| HdUvciQ3EnvzuK5UEU | CPD      | 1362   | 0.001682191 | 0.013617995 |
| QRHZU.3C6.IK_S3lOU | EXOC5    | 10640  | 0.001685015 | 0.013632093 |
| luKDukCX8l5V1D8eRM | ZNF493   | 284443 | 0.00168507  | 0.013632093 |
| xnTT3qL9TsunOS7oC4 | STXBP5   | 134957 | 0.001685846 | 0.013633761 |
| 3gpJVUvT9JfUucRUfc | MICAL2   | 9645   | 0.001691992 | 0.013678853 |
| QxSh0XeEJKIKwqVrSc | PMPCA    | 23203  | 0.001694152 | 0.013691692 |
| NuCTr4DycutX.g.TiU | LCOR     | 84458  | 0.001696035 | 0.013701244 |
| 33sT3sAH0AXpSk66dE | HEATR3   | 55027  | 0.001696478 | 0.013701244 |
| OiKok1PPrE7qf8AHU0 | CLIC4    | 25932  | 0.001697862 | 0.013702591 |
| TWd_i.ctHRULQM7pEo | GSTCD    | 79807  | 0.001697918 | 0.013702591 |
| HriJCKPnwICh9KFJuo | FYTTD1   | 84248  | 0.001698361 | 0.013702591 |
| 9uus7l7LVKeKQidX_I | BIRC3    | 330    | 0.001700244 | 0.013706762 |
| Erd7o3eH3zxdY_gZIE | DLEU7    | 220107 | 0.001700631 | 0.013706762 |
| B3f6xBYMCXrpLnmap0 | PCYT2    | 5833   | 0.001701074 | 0.013706762 |
| TJ5TH2HzSj3p66XmYo | FGF9     | 2254   | 0.001701351 | 0.013706762 |
| QkqUd_kiH_r_yq10Lk | SDF2L1   | 23753  | 0.001701739 | 0.013706762 |
| KeeRO8i1Vi3dZ1Cujg | PABPC4   | 8761   | 0.001705394 | 0.013731583 |
| NX1JxdasCkikiULhVQ | C16orf93 | 90835  | 0.001707055 | 0.013740341 |
| rAVtDscox55tPEqRKU | CD247    | 919    | 0.001709049 | 0.013748079 |
| folskgB5VNgOfeeacl | BRWD1    | 54014  | 0.001709713 | 0.013748079 |
| i3FNNCNCskL8fntN94 | FRS2     | 10818  | 0.001710488 | 0.013748079 |
| oHjV5_5KUuinfqfogQ | SLC29A1  | 2030   | 0.001711143 | 0.013748079 |
| ll.rSw5vSi1EUpejqk | SRP68    | 6730   | 0.001711707 | 0.013748079 |
| lvd6ulp_eda.qe3xTA | EXTL3    | 2137   | 0.001711984 | 0.013748079 |
| uFCnkUeT1JcDlmidU  | SMIM14   | 201895 | 0.00171215  | 0.013748079 |
| uOcpBD3VnUhXRYUXtc | SUPT6H   | 6830   | 0.001712759 | 0.013748079 |
| Z1eixqCnieiPSAhleg | APRT     | 353    | 0.00171359  | 0.013748079 |
| Zk4oFL4Tnq_4ekn8kk | ASAP1    | 50807  | 0.001713756 | 0.013748079 |
| WioKO.JLp65U4loj6U | USF1     | 7391   | 0.001717466 | 0.013769065 |
| 3GgMADsoCF5aWa6dOU | ZNF114   | 163071 | 0.001717521 | 0.013769065 |
| Tx_op4ikoo_fiVKK_I | FLJ44124 | 641737 | 0.001722062 | 0.013797831 |
| 9Kn5fV1ZeF9dLT95Ak | CSF2RB   | 1439   | 0.001722505 | 0.013797831 |
| 3Z15RdPP_T4IxPIK_4 | COMMD10  | 51397  | 0.001722838 | 0.013797831 |
| Br6C9JUB4KqU5ftSR4 | KAT2A    | 2648   | 0.001723502 | 0.01379854  |
| uV2rh4Cl37tPvZ2vUo | RBM41    | 55285  | 0.001725496 | 0.013809885 |
| f6X9cSonSwXoadwp6A | SRSF4    | 6429   | 0.001726105 | 0.013810146 |
| 9II557V7jVJXV9FuE  | MRPS2    | 51116  | 0.001727046 | 0.013813065 |
| B9D_FSZdtuuJdO8Rpk | PPP2CB   | 5516   | 0.001727877 | 0.013815095 |
| 9gcrp0_wgNe5fVf4kQ | NA       | NA     | 0.001732584 | 0.013848108 |

|                     |          |        |             |             |
|---------------------|----------|--------|-------------|-------------|
| BWiHdWH5eDQP1IrC64  | NA       | NA     | 0.001734522 | 0.013858975 |
| lqu3kUXqCMkQpcOK0U  | PHF19    | 26147  | 0.001738011 | 0.013877593 |
| NilHSVXrcJ6Hxd7o94  | KRBA1    | 84626  | 0.001738011 | 0.013877593 |
| rrpEoFVIUH.o_wwBD4  | HCST     | 10870  | 0.001739783 | 0.013887113 |
| Qpe55UerB9xL3V9R9U  | GTF2F1   | 2962   | 0.001742164 | 0.013901488 |
|                     | ANKHD1-  |        |             |             |
| TFIWCCIPoaWOul3XBQ  | EIF4EBP3 | 404734 | 0.001747148 | 0.013936615 |
| HCueIJRagJJSRAqVKA  | ARFGAP1  | 55738  | 0.001750471 | 0.013957357 |
| xXQSIsoqC7iZfrOHwA  | IRF1     | 3659   | 0.001750914 | 0.013957357 |
| BVxlrriTsE4nz4hTTI  | TMEM14B  | 81853  | 0.001752243 | 0.01396219  |
| 9oEnnFVCH5RvveV0jo  | NFYC     | 4802   | 0.001752686 | 0.01396219  |
| lr5Lyel_ZR6GEiYh0s  | TOP3A    | 7156   | 0.001755067 | 0.013974071 |
| l7gHt15BeepO6l6e70  | CPSF4    | 10898  | 0.001755344 | 0.013974071 |
| QlOP33v69xwnlCUq4l  | UBA6     | 55236  | 0.001757005 | 0.013982649 |
| cnKK1ekvl55Uu4UgkQ  | DGCR6    | 8214   | 0.0017585   | 0.013987458 |
| lGlfnlFBOiH_xbtW98  | OSTC     | 58505  | 0.001758777 | 0.013987458 |
| TUOLgKjbbq0qEWli4rQ | BSDC1    | 55108  | 0.001763152 | 0.014013578 |
| W393lZt_eoi7W_fVtY  | SNX5     | 27131  | 0.001763595 | 0.014013578 |
| KWAo7Rwo6ePVQqRWd0  | ATP2A3   | 489    | 0.001763817 | 0.014013578 |
| cpd7qTZTcRdTjhyYQc  | TMEM8A   | 58986  | 0.001768358 | 0.01404254  |
| coan3AiF50x_cXX1Lo  | RPUSD2   | 27079  | 0.001768634 | 0.01404254  |
| 61aSN.vu6ipJKjofic  | ANKH     | 56172  | 0.001770019 | 0.014048876 |
| WkjRitKL9IUM64BVN0  | POLH     | 5429   | 0.001770628 | 0.014049055 |
| Z5UfVOI.dS5WUheHoA  | PIGB     | 9488   | 0.001772622 | 0.014060216 |
| QopS7BvE4dviAvig.U  | WSB2     | 55884  | 0.001775889 | 0.014081469 |
| 0tfFE.0kdJEUx7swyk  | RCBTB2   | 1102   | 0.001780983 | 0.014117193 |
| uOeuy3MTSP7_cRCndI  | HSD17B11 | 51170  | 0.001781648 | 0.014117789 |
| 3eTel7krSR_l7lC.dc  | ANKRD16  | 54522  | 0.001783365 | 0.014124575 |
| oXnH3quXt16DonookM  | SLC6A16  | 28968  | 0.001784251 | 0.014124575 |
| ldxD4OJOU6OOMWW520  | POTEE    | 445582 | 0.001784528 | 0.014124575 |
| HU33xEiKSeKShLqnB4  | GOLGA2   | 2801   | 0.001785524 | 0.014124575 |
| KSVT1KtU3taL7s7QtY  | DHX33    | 56919  | 0.001786078 | 0.014124575 |
| xSZ1l1B_E05.egH1W4  | FAM86C1  | 55199  | 0.001786355 | 0.014124575 |
| lCX24fd3LI9uV7vlR4  | C17orf80 | 55028  | 0.001786632 | 0.014124575 |
| uXq0nXSBQVUK3cCQCU  | FHDC1    | 85462  | 0.001788847 | 0.014137421 |
| fSXqQTrgFU3MQAdpCk  | CCDC125  | 202243 | 0.001791339 | 0.014152446 |
| N0_ivqCguKIC7378u8  | HECA     | 51696  | 0.00179372  | 0.014166586 |
| WgUoCn0h94FRNcJQFU  | FCER1A   | 2205   | 0.001794551 | 0.014168475 |
| rqKWKsujRctKlyIU08  | DDX51    | 317781 | 0.001796711 | 0.014178367 |
| utCg_HgYHCl16OrWoE  | ACSF2    | 80221  | 0.001796987 | 0.014178367 |
| 3ECi90qeUF9ywk_Lrl  | SCARNA18 | 677765 | 0.001799535 | 0.01419379  |
| OUF6kEiYhVN8CFe3QA  | GPX8     | 493869 | 0.001801141 | 0.014201781 |
| oXntSfVK5Lq_6gQioE  | SLC50A1  | 55974  | 0.001802414 | 0.014205528 |

|                     |         |        |             |             |
|---------------------|---------|--------|-------------|-------------|
| oAAQBZkmiBa5eLdUqE  | NA      | NA     | 0.001802802 | 0.014205528 |
| lsWeUEVPphddv.IZfdQ | ZNF296  | 162979 | 0.001805183 | 0.014219614 |
| fnnsEqHJEhEaOLqtP0  | CD86    | 942    | 0.001807232 | 0.014226397 |
| TqKerhejzcS4kh8DoE  | GCC1    | 79571  | 0.001807232 | 0.014226397 |
| Z90NV57rKB1LrgafmY  | RYBP    | 23429  | 0.001809337 | 0.014238283 |
| InJ3lencgrooSESiA   | CAPN12  | 147968 | 0.001811552 | 0.014248644 |
| lamghK0pV6Ed8TJRTw  | CYCSP55 | 157317 | 0.001811939 | 0.014248644 |
| QFIKfORh3FW5564JKM  | MRPL55  | 128308 | 0.001812438 | 0.014248644 |
| f9ZDpdek2pNqtN19OQ  | TMEM160 | 54958  | 0.001815705 | 0.014269647 |
| IVNSvgOoigfsdJPSTQ  | PRMT10  | 90826  | 0.001823181 | 0.014323701 |
| cObdyFVG12VUo3uDEs  | NA      | NA     | 0.001824012 | 0.014325529 |
| WWOITW6.XRdRTEaXOc  | PLEKHB2 | 55041  | 0.001830214 | 0.014369529 |
| N1uDv8it7g_yvCBV5U  | SEC62   | 7095   | 0.001833038 | 0.014386987 |
| BfcddcbffRQnt6ZO5U  | MFSD2B  | 388931 | 0.001833869 | 0.014388792 |
| BlLujPul3dCET4R7lc  | PRDM10  | 56980  | 0.001839572 | 0.014428819 |
| ETgSW4s6pegkkroNQg  | CLC     | 1178   | 0.001841178 | 0.014436688 |
| rYkf7lvSA4p4cwp53s  | CPNE1   | 8904   | 0.001849651 | 0.014498377 |
| 9vjsv8BR_CodOCTXkE  | ECHDC1  | 55862  | 0.001850537 | 0.014500577 |
| WCIKEgGWIofCOFfvqk  | ROBO3   | 64221  | 0.001854303 | 0.014525333 |
| NUU4V31054Hk9fVQ0U  | HLA-G   | 3135   | 0.00185541  | 0.014525853 |
| 3zSS37vJHqwn8PtXyU  | RAP2A   | 5911   | 0.001855798 | 0.014525853 |
| IXV41buUUoqlPjzLek  | CD97    | 976    | 0.001856739 | 0.014525853 |
| Bm3ft9HjHot1vt5_tU  | USP42   | 84132  | 0.001856795 | 0.014525853 |
| 3_IUI6uESQhVN1EBv8  | RAX2    | 84839  | 0.001858511 | 0.014534536 |
| ZVVCvevU.9d70QHF3o  | HMGA1   | 3159   | 0.001861502 | 0.014553171 |
| BuPuFBPSIG4ke3zRNk  | AP1S2   | 8905   | 0.001864658 | 0.014573092 |
| xQox.DNS5a9IdFzukU  | ATP7A   | 538    | 0.00186571  | 0.014575267 |
| Kjht2j5V2t.ejh3nhl  | NUP85   | 79902  | 0.001866154 | 0.014575267 |
| l9NFipeiuR9ugRxaiM  | LONP1   | 9361   | 0.001866984 | 0.014577001 |
| QmSu4uwvTsoi7ObuZc  | OSBPL7  | 114881 | 0.001869088 | 0.014588676 |
| BsybpUpXkQR30uQZdl  | TAS1R3  | 83756  | 0.001870694 | 0.014594294 |
| lCf27qJSc65o0OZ4SQ  | CCT7    | 10574  | 0.001871027 | 0.014594294 |
| Bv67Bx6CgCCO6evoXY  | ADSS    | 159    | 0.001872466 | 0.01460077  |
| 9aqj_SEpSiM66Nf9MU  | RABGGTB | 5876   | 0.001874848 | 0.01461458  |
| 9OsBIBJN9nEFHhFJ6Y  | SBF2    | 81846  | 0.001876564 | 0.014623204 |
| clt_mP6VhmdZ.ZxJOs  | ATP5EP2 | 432369 | 0.001877672 | 0.014627076 |
| TV4RQhhcefYZfVwTYg  | NA      | NA     | 0.001879278 | 0.014634827 |
| IVJVEVzN1u512u8fV8  | PITPNM1 | 9600   | 0.001880995 | 0.014638677 |
| rVWV9U7Je97TTe5vXs  | BAIAP2  | 10458  | 0.001880995 | 0.014638677 |
| 3fSd576nru6EgoOgJQ  | PROK2   | 60675  | 0.001881659 | 0.014639093 |
| EfRM3kFIkFCTx8kko   | WDR82   | 80335  | 0.001887252 | 0.014676951 |
| B1dfervfSniSlp17Fc  | POLR2L  | 5441   | 0.001887751 | 0.014676951 |
| f_6qmSTUZfnlff04Lc  | ENGASE  | 64772  | 0.001890796 | 0.014695861 |



|                     |          |        |             |             |
|---------------------|----------|--------|-------------|-------------|
| 6lCCimWVOiCWguuCGQ  | RPS15    | 6209   | 0.001892735 | 0.014702245 |
| xVs0dJe18BpdIO5PtE  | METTL17  | 64745  | 0.001892845 | 0.014702245 |
| Qt_Bx7ty6kDtPvF3u4  | AGL      | 178    | 0.001893676 | 0.014703929 |
| HqKQR57UThdT9UC13k  | PDGFB    | 5155   | 0.001894396 | 0.014704753 |
| llrqSIPd81BNBN_tI   | B2M      | 567    | 0.001895337 | 0.014707294 |
| 60koQJSXRyBXEkSj5E  | LRRK2    | 120892 | 0.001896445 | 0.014711123 |
| 9nTXnunvp98gRQFqIlg | CCDC90B  | 60492  | 0.001897386 | 0.014713661 |
| W.NXvk3p5EiXddAjnE  | CPEB2    | 132864 | 0.001899435 | 0.014715568 |
| ZoVoRXuoXpdAdFA2dM  | LRFN3    | 79414  | 0.001899878 | 0.014715568 |
| 6w7eVN7PvnXF9AzhF4  | AEBP2    | 121536 | 0.001900266 | 0.014715568 |
| fUpVO4KiBDgSiVRuUA  | NA       | NA     | 0.001900543 | 0.014715568 |
| 9n0jjBRJep4Rej9J.k  | IRAK4    | 51135  | 0.001901041 | 0.014715568 |
| ThTs9eC6geIQjXV6I   | CAPNS2   | 84290  | 0.001901318 | 0.014715568 |
| 6qPJWck8okvqC8XrIO  | HLTF     | 6596   | 0.001906247 | 0.014748948 |
| cU5QypeO3XyAF2SSAU  | SPATA5L1 | 79029  | 0.001909625 | 0.014770313 |
| xeQoSHgqe4krsKnVE0  | LRRC61   | 65999  | 0.001910732 | 0.014774109 |
| 9uLhRerLxK79SIUyA   | CBX6     | 23466  | 0.001912393 | 0.014782183 |
| fpPOCkkS1WAIIRYIlc  | HP       | 3240   | 0.001914221 | 0.014791536 |
| ZR1IhxZKrPNUHl.ojs  | RALGAPA2 | 57186  | 0.001915661 | 0.014797888 |
| TqnWl6jv3gf6i8yiEo  | KCND1    | 3750   | 0.001917488 | 0.014802457 |
| lKeQqUJGe9S9VEefDo  | ELK3     | 2004   | 0.001917488 | 0.014802457 |
| KVVo6CCiguNYA3qcLk  | MBD2     | 8932   | 0.001925352 | 0.01485786  |
| cAA8noRrpKZe7umpIi  | KDSR     | 2531   | 0.001925905 | 0.01485786  |
| inLn3AL51ckelrurKw  | NAA38    | 51691  | 0.001927401 | 0.014863666 |
| QieqL0IUl6kEw4j9J0  | SNX29P2  | 440352 | 0.001927899 | 0.014863666 |
| N1At3ntCMj2IgjG6U4  | LYST     | 1130   | 0.001928564 | 0.014864005 |
| cJJKC677poKuE2xolk  | VPS26B   | 112936 | 0.001929671 | 0.014867758 |
| 36HqUBcKuCun2qtuug  | NCL      | 4691   | 0.001934821 | 0.014902645 |
| Z1SZ.pKUKakjZ_J0Es  | NA       | NA     | 0.001935486 | 0.014902971 |
| 3XtJATqID5OaQfQIEM  | ATP6V1C1 | 528    | 0.001938476 | 0.0149212   |
| rh.nvccCnpOFvCSntc  | SLC39A6  | 25800  | 0.001941965 | 0.014939306 |
| ueEgke2dzggSeqZez4  | SMS      | 6611   | 0.001942076 | 0.014939306 |
| 065_uLfr3ArFAQoJQI  | KLF4     | 9314   | 0.001945066 | 0.014957506 |
| OhLnXpRUI3niBT16jw  | RNF220   | 55182  | 0.001946118 | 0.014958974 |
| 96VQxU.6CVe6W7o7aw  | RAP1GAP  | 5909   | 0.001946506 | 0.014958974 |
| H0N5V.0lcf_k9fqJdl  | ZSWIM3   | 140831 | 0.001948167 | 0.014966939 |
| I4OKUNCFIIFHQkjVJU  | MLKL     | 197259 | 0.001948998 | 0.01496852  |
| Zfl9OfpXd10AqQ76xA  | C1orf56  | 54964  | 0.001950271 | 0.014969554 |
| TJUpd9N6of.pcFegl4  | DNMT3A   | 1788   | 0.001950382 | 0.014969554 |
| Kj0V7UB5cJXWU90JXk  | PRF1     | 5551   | 0.0019516   | 0.014974106 |
| ZRVIK937MXnS0vX9HU  | GALC     | 2581   | 0.001953815 | 0.014986302 |
| uTaDftTke_YOeSp4e4  | CDK8     | 1024   | 0.001955255 | 0.014992545 |
| 6tUyy9I3nyO4Sk_Cns  | ARL4A    | 10124  | 0.001958135 | 0.015009821 |

|                    |           |        |             |             |
|--------------------|-----------|--------|-------------|-------------|
| THILI4UtELgUfdL5Q0 | FOXN2     | 3344   | 0.001959796 | 0.01501775  |
| fAEA0FqFUn.SB5KgEk | IFIT3     | 3437   | 0.00196323  | 0.015036137 |
| TtFMCKkYlluruNUGq8 | NA        | NA     | 0.001963451 | 0.015036137 |
| r3ofgd6QiOUApPrFu8 | SEC24B    | 10427  | 0.001964836 | 0.015041642 |
| 3pdOgNX9WN.skU3Hpl | HNRNPA0   | 10949  | 0.001965998 | 0.015041642 |
| Enk_d54ns_AU4epUe0 | FAM50B    | 26240  | 0.001966054 | 0.015041642 |
| 9n5XXlFfVfsjHl8EdU | FAM219A   | 203259 | 0.001967771 | 0.015049969 |
| ZeZ.lLJEUds5QOQtT0 | TAB3      | 257397 | 0.001968657 | 0.015051223 |
| u3KcRAHL6LvURIsaJE | NIPSNAP3A | 25934  | 0.001969376 | 0.015051223 |
| raSShE1lJOVCd9eReg | MSL3      | 10943  | 0.001969819 | 0.015051223 |
| in2r.jn78iNlfo6io  | HDHD2     | 84064  | 0.001970706 | 0.015053192 |
| K769l_Kf_.ii.p9S1U | NDUFB5    | 4711   | 0.001971868 | 0.015054441 |
| r4gUSny6xvqv1RnKeQ | BLOC1S6   | 26258  | 0.001972201 | 0.015054441 |
| xpKvX0PpP9VIPuJQJc | NCEH1     | 57552  | 0.001972754 | 0.015054441 |
| ZjTqHSSR4UbX1Gd3Rc | SSPO      | 23145  | 0.001974028 | 0.015059363 |
| EqAloiQQQAO.CWpmuk | MAFF      | 23764  | 0.001975357 | 0.015064704 |
| ZSVvWSocin9p._oSQC | ISG20     | 3669   | 0.001976132 | 0.01506582  |
| H.qqNz871LqLR3fe2o | CCDC88C   | 440193 | 0.001977018 | 0.01506778  |
| uXo5qnf73UkTecTTPY | CTNNBL1   | 56259  | 0.001977849 | 0.015069316 |
| ZS6LveQJWPd5J.CHoQ | TRIM52    | 84851  | 0.001980175 | 0.015079132 |
| T246aZaKaK97XSWS1c | MAD2L1BP  | 9587   | 0.001980397 | 0.015079132 |
| rV15X_63ys65zK_Tm0 | MFAP3     | 4238   | 0.001981726 | 0.015084457 |
| H3Wf_o4l4yUqe_.6pU | CDK5RAP3  | 80279  | 0.001982667 | 0.015086829 |
| 3coh6hCQCnkBBUglTU | ZMIZ2     | 83637  | 0.001984328 | 0.015091934 |
| 0pU5eyxec_sKeK6CvQ | POLR3A    | 11128  | 0.001984937 | 0.015091934 |
| iQLd9dPVvi9.VF3hPU | C7orf43   | 55262  | 0.001985547 | 0.015091934 |
| HOoIP5CjkGgi16mgoo | PCSK5     | 5125   | 0.001986045 | 0.015091934 |
| o1atHo1557DqBV1VPw | PPP2R1A   | 5518   | 0.001986488 | 0.015091934 |
| iiHrXr.vV.rEhd_0uc | GTF2E1    | 2960   | 0.00198826  | 0.015100607 |
| cNUkP6KeK6ijT_JUos | SULT1A1   | 6817   | 0.001990752 | 0.015110628 |
| l0GUoNOCIfef9BVRXU | CREB1     | 1385   | 0.001991195 | 0.015110628 |
| QWtLCDITUv9zP0y0CU | ANXA4     | 307    | 0.001991472 | 0.015110628 |
| 0p8EiBCf8SG18KQS5I | COPS2     | 9318   | 0.001992192 | 0.015111304 |
| NkoglvQMRu1kSZYjXo | CLIC3     | 9022   | 0.001993022 | 0.015112819 |
| 9sHoB7vncFddSV5JdU | BST1      | 683    | 0.001994684 | 0.01512063  |
| liiAugDhdCgnGpEHol | ATF1      | 466    | 0.001996068 | 0.015126338 |
| WokXUp_QIC4pd_s1.U | CDK14     | 5218   | 0.001997231 | 0.015130364 |
| Hnj3oovBdeQAKTftXE | ZC3H15    | 55854  | 0.001998671 | 0.015136485 |
| Bhkvq.dMLNcvTsTWDk | MTPN      | 136319 | 0.001999778 | 0.015140086 |
| rXumSxHVCUUOS8M53Q | CTDSPL2   | 51496  | 0.002001717 | 0.015148781 |
| uOd.yBqAadl157pGqU | BRPF3     | 27154  | 0.002002769 | 0.015148781 |
| umi30jEe7XY7kgvtLo | IARS2     | 55699  | 0.002002824 | 0.015148781 |
| NoEh4gqQE9eonqQojU | NR1H3     | 10062  | 0.002004652 | 0.015157817 |

|                    |           |        |             |             |
|--------------------|-----------|--------|-------------|-------------|
| 99JTUg6tqaSQUfHluY | FOXP1     | 27086  | 0.002006479 | 0.015166304 |
| QckkeqEoOHRv_KK24Q | C14orf80  | 283643 | 0.002007144 | 0.015166304 |
| BBKoH9bF5Lq5IK0SLQ | CUTA      | 51596  | 0.002007864 | 0.015166304 |
| r64_dEUCX6FXVJe4X8 | GUSBP2    | 387036 | 0.002008307 | 0.015166304 |
| oXjkizUkmXvz1x.CUU | RBM18     | 92400  | 0.002009469 | 0.015167195 |
| 3Hnm08SpEpTo6AGd3k | CD247     | 919    | 0.002009691 | 0.015167195 |
| iQ5COJ6FA4k6JHCBx0 | NA        | NA     | 0.002012958 | 0.015187069 |
| TJHktaXq4CJiHW3QA  | AKR1D1    | 6718   | 0.002015949 | 0.015203395 |
| cSVTU715AoTjf3_kFE | CHMP3     | 51652  | 0.002016392 | 0.015203395 |
| lvhNQNYUiV9HIOMnqk | MAP2K1    | 5604   | 0.00201761  | 0.015207794 |
| xuPF55OAlk6qFe5N7k | NRIP1     | 8204   | 0.002019382 | 0.015209219 |
| ITulCXJNOiUgLMI_e0 | ZFAND1    | 79752  | 0.002020047 | 0.015209219 |
| HgVCKaKtrjugW0ZAVA | NA        | NA     | 0.002021154 | 0.015209219 |
| 6VfqsqoV4P5U1F6tH8 | DHX34     | 9704   | 0.00202132  | 0.015209219 |
| 9lls.P7RYq7uZnZpq4 | EHBP1L1   | 254102 | 0.002021819 | 0.015209219 |
| KeRf6rTn_yS7dX5hdk | ANKMY1    | 51281  | 0.002022705 | 0.015209219 |
| EXRtTR6d3D1H7097hU | ATP6V1G2  | 534    | 0.002023868 | 0.015209219 |
| ZqUTIT9VH5ODthHsIE | ZNF417    | 147687 | 0.002024034 | 0.015209219 |
| Eqvau3bu4E0Stz3owk | MLL5      | 55904  | 0.002024643 | 0.015209219 |
| 3l19VEvdCgqXekNEnc | WDFY4     | 57705  | 0.00202492  | 0.015209219 |
| WQvQUkkih6oFY4loqA | FXD1      | 5348   | 0.00202492  | 0.015209219 |
| KiaI2VRxHUI60EgEAA | POM121L8P | 29797  | 0.002025418 | 0.015209219 |
| WkEvu3I7SKTp6l1N3k | TRIM38    | 10475  | 0.002026415 | 0.015211936 |
| ZedqKeKSIDR_Dcops  | NLRP8     | 126205 | 0.002027855 | 0.015215531 |
| 6_RziXMhzS9X_po 8  | HPRT1     | 3251   | 0.002028408 | 0.015215531 |
| NiuqL2IUI40E6IAXt0 | ZNF557    | 79230  | 0.002029738 | 0.015215531 |
| 0MfgF3eFCJd46LqK4k | TTPAL     | 79183  | 0.002029904 | 0.015215531 |
| ZKI563TXefX_X8VzF0 | WDR6      | 11180  | 0.00203007  | 0.015215531 |
| xrR.n54VfXTL7_nPn0 | CCL28     | 56477  | 0.002031731 | 0.015223219 |
| HV7dRQAxAA3lqbrpEY | MBTD1     | 54799  | 0.002032617 | 0.015225096 |
| fcXnTIKINTB5cil6pU | BRPF1     | 7862   | 0.002034721 | 0.015236094 |
| Zwvp0Jat6XhKuS0RSg | PGP       | 283871 | 0.002038709 | 0.015261179 |
| 6e6ETXdRXepdLt_OzQ | APOBR     | 55911  | 0.00204109  | 0.015272775 |
| ZSJVV07flifXU7v7A  | SBK1      | 388228 | 0.002041533 | 0.015272775 |
| f7CVXir4tLe37_e5Rk | ZC3HAV1   | 56829  | 0.002042917 | 0.015278361 |
| iCx9eaSOkSV9RaijSc | ERCC2     | 2068   | 0.002044191 | 0.015283115 |
| TSKXWS0XDR3XXfxvU8 | IL1RN     | 3557   | 0.002046129 | 0.015284104 |
| TRo0eSXUXVL0ID3Tt0 | DSCR8     | 84677  | 0.002046351 | 0.015284104 |
| QS_tNBz.V_Hnteo6Xk | TLR8      | 51311  | 0.002047126 | 0.015284104 |
| ouHEd5P5QagmO6UJHo | TMEM168   | 64418  | 0.002047237 | 0.015284104 |
| NU6nJhxfiEtfxcpe6M | TMLHE     | 55217  | 0.002047514 | 0.015284104 |
| iy6oOgIvlfvkLDgl48 | SREK1     | 140890 | 0.002049563 | 0.015294633 |
| 3iBHES54LUnrERarhE | NFATC2IP  | 84901  | 0.002051168 | 0.01530185  |

|                    |           |        |             |             |
|--------------------|-----------|--------|-------------|-------------|
| oeiiE2l3kp_WCCogAg | NA        | NA     | 0.002053771 | 0.015316496 |
| xG19lklKbEYonYd7IA | BANF2     | 140836 | 0.002055432 | 0.015324115 |
| xd0iAsn_4TtOBU7_Q0 | FAS       | 355    | 0.002056208 | 0.015325126 |
| KKfp6gBKUOVaQgK_I0 | C1orf186  | 440712 | 0.002057094 | 0.015326732 |
| EoKilM3EESXdpHnnXw | SUPT16H   | 11198  | 0.002057703 | 0.015326732 |
| uo6C3k3ivnS7VrT0.E | ASAP1     | 50807  | 0.002058866 | 0.015328748 |
| QLTjRIHmcSXqYRLCfc | HAUS2     | 55142  | 0.002059254 | 0.015328748 |
| iKkl3vpeKt6Gf.Pzlw | DCAF15    | 90379  | 0.002060527 | 0.015333464 |
| QU3eoPu6s8O.U71Qc4 | SLTM      | 79811  | 0.002063573 | 0.01535136  |
| r55UN9FJ9IDeF.ljnk | UPF2      | 26019  | 0.002066619 | 0.015364475 |
| xdez3g64HegkqPu3p0 | UFM1      | 51569  | 0.002066619 | 0.015364475 |
| ZKNqnnzl.b81_q.iJk | GOLGA7    | 51125  | 0.002067283 | 0.015364647 |
| QRf9NVAokbg_LZemk  | C6orf211  | 79624  | 0.002068501 | 0.015368933 |
| ZdeuSleiSLhaShungg | PIDD      | 55367  | 0.002073541 | 0.015397396 |
| KEReiKE.gBHvfFdgv4 | RBM25     | 58517  | 0.00207415  | 0.015397396 |
| oSnepR9xM1RMqc9QXo | CCDC112   | 153733 | 0.002074261 | 0.015397396 |
| rrhKyeoXKc3xTgr7.k | TSC22D1   | 8848   | 0.002077528 | 0.015416872 |
| x453XXFluCVei1dRdQ | TRAPPC1   | 58485  | 0.002078636 | 0.015420314 |
| KR6i5xSBxRKOAAuuUU | UBXN2B    | 137886 | 0.002079466 | 0.0154217   |
| EWC3iQguruC3Xd6.so | NA        | NA     | 0.002080629 | 0.015425549 |
| QS6TsXvt0nO6gjR_KU | INADL     | 10207  | 0.002082623 | 0.015435552 |
| fQfQCj9KeLuunRlzEU | KCNK6     | 9424   | 0.002092092 | 0.015500939 |
| cN3p4qOHxe9LhcQ9d4 | HSP90AA1  | 3320   | 0.002096079 | 0.015525679 |
| cC0usRIT3sTNe4Bue0 | SYNJ1     | 8867   | 0.002097021 | 0.015527851 |
| Th6f_qxCrhyBfXqHek | ZNF142    | 7701   | 0.002098239 | 0.015532071 |
| coi1_AiFQoBXg9MVG0 | C14orf142 | 84520  | 0.002099014 | 0.01553301  |
| Q4dLhS5e4k6pSgLesM | MC1R      | 4157   | 0.002100897 | 0.015542141 |
| T5n6RXVVFeldl46CP8 | ALAS2     | 212    | 0.0021035   | 0.015556592 |
| xBdYCqG6aWLu5gFwGA | COMTD1    | 118881 | 0.002106546 | 0.015574308 |
| 991T4SiR_leXxeUJUc | AIP       | 9049   | 0.002107321 | 0.01557493  |
| oJQOvwfeXugeqPq6ko | BLMH      | 642    | 0.00210793  | 0.01557493  |
| lBk1SUuU7XeSui8elw | RALY      | 22913  | 0.002109148 | 0.015579126 |
| ruBeOoF3e4RXW735eU | CDK5RAP3  | 80279  | 0.002113966 | 0.015609899 |
| cnk9TF0uCCWCjnhES4 | USO1      | 8615   | 0.002118839 | 0.015641062 |
| BL05FX39VIqnodK4s4 | NA        | NA     | 0.002120113 | 0.015645643 |
| oUez8UfcluHhhqUjhU | ZFYVE16   | 9765   | 0.002121221 | 0.015648261 |
| 9huYBfllqoxtbTYgb8 | POLR2E    | 5434   | 0.002121774 | 0.015648261 |
| fW.n38HULmg4Ty6Bak | INPP5E    | 56623  | 0.002122771 | 0.015650794 |
| NjWn5UglghJTToLjV8 | C11orf48  | 79081  | 0.002123768 | 0.015653325 |
| uBTuKJcLTwGjTt7E_4 | MOSPD1    | 56180  | 0.002124654 | 0.015655038 |
| T5yyiW8qii.qt1EY5c | ANK1      | 286    | 0.00212554  | 0.015656751 |
| c6eraJ1O9cJytytxHU | PRMT2     | 3275   | 0.002126204 | 0.015656831 |
| uNSJOiVhVJSzfUdTT8 | CHERP     | 10523  | 0.002126924 | 0.015657319 |

|                    |           |        |             |             |
|--------------------|-----------|--------|-------------|-------------|
| WvzaAinrrahSyijZ_I | NA        | NA     | 0.002130136 | 0.015676146 |
| iSpBJUVXLEHjnV4hBc | LAS1L     | 81887  | 0.002131853 | 0.015683961 |
| W_HQFRrmXalvKrFWKQ | NA        | NA     | 0.002133368 | 0.015692586 |
| BuOl._Or.vu37gQtvE | CHMP5     | 51510  | 0.002138277 | 0.015721563 |
| Bx36KeKSgiV_JUonoo | LOC285696 | 285696 | 0.002142707 | 0.015745745 |
| ce77epX78QkZvFfxio | TTL12     | 23170  | 0.002143205 | 0.015745745 |
| KiUc6s0n6i6UyOFk.U | ZNF436    | 80818  | 0.002143537 | 0.015745745 |
| oepEhNwXrPsKSKdU_g | GNA12     | 2768   | 0.002146749 | 0.015762112 |
| oU_kSor_F31ec81ddU | CHN2      | 1124   | 0.002147082 | 0.015762112 |
| Tuv1UFvUApz9AoFJUy | SLA       | 6503   | 0.002148798 | 0.015764286 |
| WoTvwS6U7yeraghNTo | ACOT9     | 23597  | 0.002149186 | 0.015764286 |
| HqHVc9luyeol4JXT6A | CHD2      | 1106   | 0.002149352 | 0.015764286 |
| Tky.Rrvepd4CCDqeUU | SLC25A35  | 399512 | 0.002150127 | 0.015765145 |
| NnELc339_FT9KKiV3U | DNAJC14   | 85406  | 0.002152066 | 0.015774528 |
| HeCJwAelLuq8kjYMH4 | ATP11C    | 286410 | 0.002153395 | 0.015779441 |
| WQ.ew7Vff3Kd757uDU | TMX1      | 81542  | 0.002156773 | 0.015798992 |
| W6vlrSJ8lockV5DIXc | MPV17     | 4358   | 0.002157382 | 0.015798992 |
| BCguBKXhXjIQwakFco | JOSD1     | 9929   | 0.002159929 | 0.015807981 |
| 3ncoveBoKSGIph81LU | NA        | NA     | 0.002159929 | 0.015807981 |
| HDO6yMs5CAJaua6dKU | MYO3B     | 140469 | 0.002160871 | 0.015810041 |
| NuURnZ3.8RUuXeHe1U | VKORC1    | 79001  | 0.00216231  | 0.015815744 |
| cdCVX1_d6FXysxXolk | MPI       | 4351   | 0.002166076 | 0.015838451 |
| 6PIAxH.UD_1QSV7CUk | FAM188A   | 80013  | 0.002171005 | 0.015869645 |
| Kekf6ilgujo83itKT0 | FAM229B   | 619208 | 0.002174106 | 0.015880609 |
| BX5UdciEnudH.Xn_5c | KIF2A     | 3796   | 0.002174161 | 0.015880609 |
| riK6e_tKGoJ64X6Tt8 | METT16    | 79066  | 0.002174493 | 0.015880609 |
| N8EYzSRPV_000K76dl | ARL5A     | 26225  | 0.002178314 | 0.015903665 |
| lbOxLyH5KeSi5Xk_0  | AGGF1     | 55109  | 0.002181692 | 0.01592266  |
| iqCSnuh96DxQSg4oCA | PRPF18    | 8559   | 0.002184074 | 0.01592266  |
| QZNzuleozr.9ei_Eek | UXT       | 8409   | 0.00218435  | 0.01592266  |
| IG2.H1KUh3FMV6oIVI | ANAPC5    | 51433  | 0.002184793 | 0.01592266  |
| ZidJRcRFFulhH9PCC8 | NA        | NA     | 0.002184904 | 0.01592266  |
| cuD4rkLe7P6kenugAk | CDKN2AIP  | 55602  | 0.002184904 | 0.01592266  |
| 0l7FZhwch.3577kC9I | NMT2      | 9397   | 0.002186178 | 0.015927096 |
| cJUifgKWa_kfYgoLog | HRK       | 8739   | 0.002188614 | 0.01594     |
| uEFBIHqvVBU2dJJZ9I | HNRNPR    | 10236  | 0.002190497 | 0.015948863 |
| KOX13sR_gOXen75JXU | HERC3     | 8916   | 0.002192048 | 0.01595368  |
| fprgRN4JRzv16dwp20 | NKD2      | 85409  | 0.002192491 | 0.01595368  |
| fkece.zUfpRlf.cEnk | LEPROTL1  | 23484  | 0.002194651 | 0.015958467 |
| 0e5.F1_V_7dK7rV5ec | COLGALT1  | 79709  | 0.002194706 | 0.015958467 |
| iltmqESi31xLERGVIO | RARS2     | 57038  | 0.002195315 | 0.015958467 |
| 0lQpzJV19DPhcGqiAl | TCP1      | 6950   | 0.002195813 | 0.015958467 |
| iZCU.3v3JHVFOOZ0LO | TMF1      | 7110   | 0.002197918 | 0.015968915 |

|                    |          |        |             |             |
|--------------------|----------|--------|-------------|-------------|
| 6a456qCfGS0Sx6ffXc | NA       | NA     | 0.002199191 | 0.015973324 |
| 3oVdQMr.n3rg360_rw | AGGF1    | 55109  | 0.00220113  | 0.015979704 |
| Zt4IXT14W1u90ouvig | PACS1    | 55690  | 0.00220196  | 0.015979704 |
| Kb93lrZDolljZZnrT4 | ACTG1    | 71     | 0.002202071 | 0.015979704 |
| EZ5JQf5TwB3_UC.kXs | NA       | NA     | 0.002204674 | 0.015993746 |
| rH0Oy.1NfQMBO3IVO5 | KIR2DL1  | 3802   | 0.002205892 | 0.015994102 |
| HRIJUou7obeJUn95uU | SOLH     | 6650   | 0.002206058 | 0.015994102 |
| NOZsFtdX_tKnMVBehc | TFG      | 10342  | 0.002213313 | 0.016039397 |
| EpTVAnPeqkEiuAcepQ | FUCA2    | 2519   | 0.002213645 | 0.016039397 |
| WKIJIF6L16pJ5hLGFQ | KLC3     | 147700 | 0.002215417 | 0.016047382 |
| 6fbhdbuVioliluHJ38 | SLC25A3  | 5250   | 0.00221885  | 0.016067394 |
| ZFQFunRtEUIFd3herc | NA       | NA     | 0.002220124 | 0.016071758 |
| B3q9A94B7R88Xs4E6k | MS4A3    | 932    | 0.002223724 | 0.016092899 |
| QjR9ZRJe.NAJCVVKVI | UQCR11   | 10975  | 0.002224388 | 0.016092899 |
| N7q9CJXeH7gg.nld8I | CCPG1    | 9236   | 0.002226991 | 0.016106865 |
| WyeKvvp yeFFAJLR4  | NUP160   | 23279  | 0.002228984 | 0.016116417 |
| HXyt34Sg3ldISUofq0 | SRGN     | 5552   | 0.002230369 | 0.016121561 |
| onfr0iSkgXbp4oiHSc | EPG5     | 57724  | 0.002233747 | 0.01613704  |
| ECCG5e.VfZfeW4_0v0 | PMS2P4   | 5382   | 0.002233858 | 0.01613704  |
| oFTnmol7udJfcqUrAg | CXorf40A | 91966  | 0.00223646  | 0.016150971 |
| x36p2oU54n.6RRUSIE | ABHD12   | 26090  | 0.002242718 | 0.01619128  |
| OfXrQnznz.jepR9XU  | PSMF1    | 9491   | 0.002243881 | 0.016194795 |
| QOIOFSCziiTuaiSSnQ | SF3B2    | 10992  | 0.002245099 | 0.016198707 |
| o.19R3qt29KT6rddFU | NA       | NA     | 0.002246373 | 0.016203016 |
| 3h4ZBUbsHtJaleLDZ8 | CEBPB    | 1051   | 0.002247979 | 0.016206039 |
| BU6gOUeyttjF3p4KPk | TMPO     | 7112   | 0.002248145 | 0.016206039 |
| TA51Qrdl4JrgAI9Ivo | PPM1B    | 5495   | 0.002249585 | 0.016207062 |
| NUMU4L0p7jep1eH94I | DGUOK    | 1716   | 0.00224964  | 0.016207062 |
| Zeixed7.6e4hyRwo94 | RAB4A    | 5867   | 0.00225108  | 0.016212559 |
| Qeh9al2P31kQl4W6P0 | ADAT3    | 113179 | 0.002252575 | 0.016218451 |
| 6dlvrulxenMTfTV1UU | DDRKG1   | 65992  | 0.002257947 | 0.016252242 |
| EU1P0UVN1NSImcix6E | ANXA6    | 309    | 0.002260106 | 0.0162629   |
| 658vdHt163ueV53qjk | INPPL1   | 3636   | 0.002262764 | 0.016277137 |
| Nfp52erfo7avYUfpY4 | NA       | NA     | 0.002264481 | 0.016278986 |
| fuVQf59yN3quooUf90 | ZNF691   | 51058  | 0.002264758 | 0.016278986 |
| uLiWI8TR5HUm6iEiFc | NA       | NA     | 0.002265423 | 0.016278986 |
| 0pRTRDHCqdl7t_5UXc | ATF7IP2  | 80063  | 0.002265976 | 0.016278986 |
| Zp.sTBQSkjHi5fp1yl | PPP1R3B  | 79660  | 0.002266419 | 0.016278986 |
| Ne795C5TX7Eu8lqwTo | ZEB2     | 9839   | 0.002268911 | 0.016292    |
| TdVw_E9zSVBXT3kqUU | NIPSNAP1 | 8508   | 0.002280485 | 0.016370199 |
| H56KZT6Jafp6YlaeKI | AKIRIN1  | 79647  | 0.002281925 | 0.016375627 |
| fueTBSx34QRailb3ug | NA       | NA     | 0.00228342  | 0.016381449 |
| ZV7oCccsT4UmerjEj0 | VBP1     | 7411   | 0.002284694 | 0.016385679 |

|                    |           |        |             |             |
|--------------------|-----------|--------|-------------|-------------|
| opJV4Pp0G.uius.V4I | FAM105B   | 90268  | 0.002292225 | 0.016433824 |
| BWzioHuyEKxStLffU4 | SP100     | 6672   | 0.002292779 | 0.016433824 |
| Bd..UvRe5g1hUXVII4 | TBX19     | 9095   | 0.002297431 | 0.01646224  |
| IVzibp74te3Xq3h.Ww | DHDDS     | 79947  | 0.002298981 | 0.016463897 |
| QYZ990I1LdS9Qo6tN0 | CNTD2     | 79935  | 0.002299036 | 0.016463897 |
| uXfx9ASQALqqTPste0 | ZFYVE16   | 9765   | 0.002300642 | 0.016468955 |
| uCSeu6SvSiC6Reuihc | TMC8      | 147138 | 0.002301252 | 0.016468955 |
| Kmjno6I5IBBRRER9c  | ARFGAP3   | 26286  | 0.002301805 | 0.016468955 |
| 060yBcglAJREgqQg1Q | SLC40A1   | 30061  | 0.00230391  | 0.016479089 |
| 39JjkrJqhjl_johjhc | INO80E    | 283899 | 0.002305682 | 0.016486841 |
| NqP5df4dRAKwgro6d4 | SNRNP27   | 11017  | 0.002307011 | 0.016491422 |
| QgAss4.nptFXedbmpk | NDUFB1    | 4707   | 0.00231133  | 0.016512266 |
| 9klC3Bc9a73d1TiEJY | SNORA28   | 677811 | 0.002311995 | 0.016512266 |
| c6IJS5wllWKVmHyyA  | PSMB4     | 5692   | 0.002311995 | 0.016512266 |
| Nfl1Xejs3rSoLqo738 | FBXO18    | 84893  | 0.002312936 | 0.016513316 |
| NeBlBTXhWUud_t14uw | C17orf62  | 79415  | 0.002313767 | 0.016513316 |
| cS86KH7OiA.C30eKIE | ZNF23     | 7571   | 0.00231421  | 0.016513316 |
| ooyO15fmtHAquF_9fk | MAP3K9    | 4293   | 0.002319581 | 0.01654258  |
| uhfkPyDQkriEqILOXk | EVI2A     | 2123   | 0.002319692 | 0.01654258  |
| IS60Hq9HTQdPVtUvx0 | SIKE1     | 80143  | 0.002322627 | 0.016558581 |
| OpVp4r_gKDQgGkilel | TSR3      | 115939 | 0.002324953 | 0.016570231 |
| i_BWoplR4Liel2ZT5E | ZNF430    | 80264  | 0.002326393 | 0.016575561 |
| oj5fPx55gT35ETlesY | SWSAP1    | 126074 | 0.002327833 | 0.016580888 |
| BRKVIgUvqf73Xkprz0 | NA        | NA     | 0.002329051 | 0.016584634 |
| 0lLf.0_GVSPVSubyXE | NUBP1     | 4682   | 0.002330989 | 0.016593503 |
| 3iiiDugisAJ6kQvTOU | NAA50     | 80218  | 0.002334589 | 0.016614189 |
| Zm6nY9dKIG8USF7_.c | SNRPB     | 6628   | 0.002335419 | 0.016615165 |
| 9.Vx1Op6TqnVEo0ino | GALT      | 2592   | 0.002342618 | 0.016660205 |
| IUZOFRHhRFev32uE98 | NECAB2    | 54550  | 0.002343338 | 0.016660205 |
| IGLhY85.f6XE9.Pea4 | PPP1CC    | 5501   | 0.002343837 | 0.016660205 |
| Bwq5K70IIte7RT67q4 | NA        | NA     | 0.002344778 | 0.016661952 |
| xsHVVKxjKh4M6FeeAk | IRS2      | 8660   | 0.00235015  | 0.016692973 |
| lIN8I9xEHutN30tORY | OR52K2    | 119774 | 0.002350537 | 0.016692973 |
| iFilMv7TUfLu8nrqsQ | DMTF1     | 9988   | 0.002351755 | 0.016693693 |
| BSHqBKISg3u6xAXk64 | F2RL1     | 2150   | 0.002352032 | 0.016693693 |
| KeXp11_Kegd3Uq68Hc | C9orf114  | 51490  | 0.002352863 | 0.016694642 |
| uSfl6ingbjh6cRBljk | CEBPZ     | 10153  | 0.002355189 | 0.016706197 |
| HohZok1CB6CcLMZ5ro | SP100     | 6672   | 0.002360284 | 0.016737379 |
| 3p0.o5zSglTrTXlgC4 | CCDC90B   | 60492  | 0.002366486 | 0.016775748 |
| cK9yp6ieo.gUo3tJkk | GLRX3     | 10539  | 0.002367095 | 0.016775748 |
| ijjV_JUivYhyXqQRLQ | LOC440157 | 440157 | 0.002367815 | 0.016775887 |
| QT5HUI6kMluAd7dSgA | NA        | NA     | 0.002373242 | 0.016797602 |
| oUuoJKG3qfXr3KhKII | SARS2     | 54938  | 0.002373574 | 0.016797602 |

|                    |          |        |             |             |
|--------------------|----------|--------|-------------|-------------|
| Qr_XT3UIIEHQnge4C4 | FBXW7    | 55294  | 0.002373574 | 0.016797602 |
| WleDgRX0vki0nvtJJU | ACSM3    | 6296   | 0.002373685 | 0.016797602 |
| TepXsAy7x7DHe.5deU | FAM160B1 | 57700  | 0.002378392 | 0.016825941 |
| rWlci0TXhEHfteu5yl | SNORA45  | 677826 | 0.002381991 | 0.016846431 |
| B1lTjnlQacbcacQ93k | MAEA     | 10296  | 0.002383265 | 0.016850464 |
| cYvPpC9V5L7_p7Z7p4 | GUSBP4   | 375513 | 0.002384705 | 0.016855668 |
| 9l6UenfRLoVSRdqukg | GLTPD1   | 80772  | 0.00238692  | 0.016866348 |
| i05l6muoUe0fUnlVbs | SREBF1   | 6720   | 0.002391959 | 0.016896973 |
| 9UqUnRQonkkkTAtLhM | NA       | NA     | 0.002396223 | 0.016922104 |
| xV6RCA9S07gkB5X_10 | FNDC3B   | 64778  | 0.002398383 | 0.016932364 |
| 3qVltSW1J51.VL_POM | CENPB    | 1059   | 0.002399158 | 0.016932847 |
| 6rtQQSd506d0CBSaF4 | POGZ     | 23126  | 0.002401096 | 0.016940452 |
| TUGFQAKWmmroZpmYoU | RAB27A   | 5873   | 0.00240165  | 0.016940452 |
| uFAn28g7eXx6.VSoKA | PARP1    | 142    | 0.002402647 | 0.016942494 |
| rVHloAfoZFn_gd1ag8 | NA       | NA     | 0.002404419 | 0.01695     |
| cb2.e.e.Eb6LqtdbqY | MIER2    | 54531  | 0.00240525  | 0.016950868 |
| ZUh0EI8Ss3T4NLm0il | PIBF1    | 10464  | 0.002407354 | 0.016960708 |
| Z_KKcQEvkt0fqEpRJQ | NOMO1    | 23420  | 0.002410068 | 0.016970623 |
| cszNSROa1CgTiaWZac | FLII     | 2314   | 0.002410178 | 0.016970623 |
| BkTt5Qouv7Hnu.rE3I | KLHL12   | 59349  | 0.002412227 | 0.016976008 |
| E5k7rIK7mduXVUSAp8 | DTD1     | 92675  | 0.002412892 | 0.016976008 |
| 3Xq7ouAi0e66qYiuh8 | ZNF784   | 147808 | 0.002413279 | 0.016976008 |
| QtAJU8GIC5eVHkGiWU | ATXN7L2  | 127002 | 0.002413778 | 0.016976008 |
| rq.p7S6E6ono6A5d0c | TMEM214  | 54867  | 0.00241627  | 0.016984492 |
| lkiO76v665OXuNcnno | MFSD11   | 79157  | 0.002417765 | 0.016984492 |
| 6GcsvrxHjgDA5fRqAo | CAMK2D   | 817    | 0.00241782  | 0.016984492 |
| H6_FfqsaA7S3i67fHU | SNRK     | 54861  | 0.00241782  | 0.016984492 |
| Qdsjfycf6ooqCueMX0 | CCNG2    | 901    | 0.002419205 | 0.016989235 |
| Wec55HI09ljl5eTq14 | TRIM10   | 10107  | 0.002421254 | 0.016992013 |
| 9UR9KET_8fbiQlaKdo | HAGH     | 3029   | 0.002421808 | 0.016992013 |
| QnimrgNF4rTi9CFJeE | RHBDL2   | 54933  | 0.002422251 | 0.016992013 |
| fwp4eRXI4avjq5JAUU | PATE2    | 399967 | 0.002422804 | 0.016992013 |
| 0EbCMSt83Xjru1P_Xo | TMEM126B | 55863  | 0.002423192 | 0.016992013 |
| T3OZey1ScVKKCeSjDY | ALPP     | 250    | 0.002423856 | 0.016992013 |
| r5zV11TXsVVP3ql00c | FXR2     | 9513   | 0.00242801  | 0.017016149 |
| 3_6MnkB5jPnjiz.hIE | CHRFAM7A | 89832  | 0.002431    | 0.017032123 |
| xo4ioFHME4tQISCH3s | SYCP2    | 10388  | 0.00243244  | 0.017037228 |
| QpDI0uP1SSNPa30F9U | GPBP1    | 65056  | 0.002435264 | 0.017052023 |
| HqTXTB31ODpCqx86AE | QTRTD1   | 79691  | 0.002440746 | 0.017085417 |
| BdREVTRUjd8S97wS4o | ZFR      | 51663  | 0.002441965 | 0.017088951 |
| Kknko96T.k5T3U0jeo | ASAP2    | 8853   | 0.002443294 | 0.017093258 |
| Bnkekn._3X_rPRBJSO | TXLNA    | 200081 | 0.00244573  | 0.017105309 |
| uJ_p3XplWyTYu33_30 | SF1      | 7536   | 0.002448776 | 0.017121612 |



|                    |          |        |             |             |
|--------------------|----------|--------|-------------|-------------|
| HHQq60nQ5xEiRof_j0 | IL10RB   | 3588   | 0.002449884 | 0.017124357 |
| fXyKU3jjl9Uiejo1co | OSTM1    | 28962  | 0.002452708 | 0.017136033 |
| cH7riqK03sh16F7.5c | ZNF69    | 7620   | 0.002452985 | 0.017136033 |
| 9e.eSqOM_uL5QIJDEk | WSB1     | 26118  | 0.002453705 | 0.017136065 |
| ZdFXIb5QUgeG7hders | RRBP1    | 6238   | 0.00245592  | 0.017146535 |
| Bq36luOQguDVVBSRSE | HAX1     | 10456  | 0.002461513 | 0.017180577 |
| Brh5YgvVSn11AFRpec | NA       | NA     | 0.002462897 | 0.01718216  |
| o5foz96rpyHplXqUX8 | CERS4    | 79603  | 0.002463174 | 0.01718216  |
| 0V.iL1ELrLlUvwbf10 | TOR1AIP1 | 26092  | 0.002464559 | 0.017184565 |
| uSKJJzePoBeWHy5rjl | PCOLCE2  | 26577  | 0.002465943 | 0.017184565 |
| cPKsRJ6UUDmCON5x8E | DYNLT3   | 6990   | 0.00246622  | 0.017184565 |
| ZeyQbe0pVfu.TdeZmw | RNF165   | 494470 | 0.002466995 | 0.017184565 |
| fY54l_Luif3l_yupqU | COPRS    | 55352  | 0.002467106 | 0.017184565 |
| Qsl4Lql_fi1KIUI6kE | SYNJ2BP  | 55333  | 0.002468989 | 0.017192681 |
| iKl6Ke4iOKThxwq.qs | OXTR     | 5021   | 0.00247209  | 0.017209272 |
| fdeh7h.S6iOgu.SIHg | SUMO1P3  | 474338 | 0.002473419 | 0.017212761 |
| lfXxJfqjoflRF1F1Xg | PTPN7    | 5778   | 0.002474028 | 0.017212761 |
| xiaOf05Ffx5H94UonE | TAX1BP1  | 8887   | 0.002476742 | 0.017226636 |
| 3v60KrK5BUOhR85A14 | PNRC2    | 55629  | 0.002478624 | 0.017230111 |
| TtLUnTeUA7KnFt_jk4 | MTM1     | 4534   | 0.00247868  | 0.017230111 |
| 6eK7Ey19WIM8FESXiU | DNM2     | 1785   | 0.002480397 | 0.017237042 |
| 0uuXykN.UCwPSpVPnE | CPNE3    | 8895   | 0.002484107 | 0.017257819 |
| l1JThIKH3W5ULo9NPU | ARMC10   | 83787  | 0.002485657 | 0.017263585 |
| 3leF9Ou3_CVBR2v19o | RERE     | 473    | 0.002488537 | 0.017278575 |
| 6vnrqT9VL9zqdbfdC0 | BRD4     | 23476  | 0.002491361 | 0.017290468 |
| 6ge_r3vH3hHSgjHPrs | TTC33    | 23548  | 0.002491693 | 0.017290468 |
| Zov8vJoLS9Kk.yp7fk | ARHGAP12 | 94134  | 0.002493133 | 0.017295448 |
| Higel0SoKl_iuMUKSE | SP140L   | 93349  | 0.002494185 | 0.017296571 |
| 6Z478EI6lpSkY6dOXs | NA       | NA     | 0.002494739 | 0.017296571 |
| fJsk5Bl.7k4DiH1.S4 | CCPG1    | 9236   | 0.002498062 | 0.017314535 |
| 6dvJB5iSCf1LRE0KZ8 | TRMT11   | 60487  | 0.002499502 | 0.017314535 |
| ZuYFknIDklnqngDI8  | SCAMP3   | 10067  | 0.002499502 | 0.017314535 |
| 3iHtXgFyx5VU4oKBJA | ERBB2    | 2064   | 0.002500222 | 0.017314535 |
| iv17X_dOe.C5KeIVl  | SYPL1    | 6856   | 0.00250443  | 0.017334425 |
| ct9dVACgEvyT7cD0uk | EIF5A2   | 56648  | 0.002504541 | 0.017334425 |
| cJ3vePRsq1tLLT5RWY | PIK3CD   | 5293   | 0.002507365 | 0.01734896  |
| HV7LUuueV77kB51.90 | RAB31    | 11031  | 0.002510799 | 0.017367699 |
| KmkuSUypHf0ros47pQ | GRIP2    | 80852  | 0.002512958 | 0.017373754 |
| ZGeyE9Xdet3q3p9Snc | STK11IP  | 114790 | 0.002513124 | 0.017373754 |
| onYjOL3kArrWTX6V3o | SCARB2   | 950    | 0.002516336 | 0.017385923 |
| EYZxSf3hd4ffoCJLVo | PAAF1    | 80227  | 0.002516336 | 0.017385923 |
| BKS6Xoin_97Brl.3yo | PLEKHG3  | 26030  | 0.002518717 | 0.017397357 |
| cvD5.5K_Ed0XhI47D0 | MED23    | 9439   | 0.002520656 | 0.017405726 |

|                     |              |           |             |             |
|---------------------|--------------|-----------|-------------|-------------|
| o0GIwm6C6HaNVmSXH0  | CAD          | 790       | 0.002522095 | 0.01740869  |
| TtL5_55XtztvOd4Mrdo | CEP44        | 80817     | 0.002522538 | 0.01740869  |
| Z6ijZeJUqK0KeS4kOM  | ZNF786       | 136051    | 0.002523923 | 0.017413228 |
| l1NRAo5LIUH7HmXgy0  | FAF2         | 23197     | 0.002525086 | 0.017416235 |
| un14uff36J4U7rAFXo  | FANCL        | 55120     | 0.002526526 | 0.017417282 |
| EZ3XJG1P1KKIJCSOIo  | SEC23IP      | 11196     | 0.002526692 | 0.017417282 |
| TBYqECiPo4eoJnpWgQ  | LPIN2        | 9663      | 0.002532617 | 0.017453104 |
| 6_y1ScdGKfA6ijR_KU  | LOC100129055 | 100129055 | 0.002533559 | 0.017454571 |
| faGe8aCAX4AJK6eKXo  | OGFOD1       | 55239     | 0.002546517 | 0.017533676 |
| We2op7nrrbsitfd0Q   | ITSN1        | 6453      | 0.00254696  | 0.017533676 |
| ZgrvgnZukSpMKiigsI  | EXOC1        | 55763     | 0.002547237 | 0.017533676 |
| 64cefQQFIQsHmzi8M   | NA           | NA        | 0.002548566 | 0.017537785 |
| 09Jkl_l2qSepVdO5S8  | ADRM1        | 11047     | 0.002549396 | 0.017538462 |
| fXVd5H_.H7.kSG6l6k  | NRBP1        | 29959     | 0.002551778 | 0.017549804 |
| fM6qepdqHdncMCh7KU  | ZBTB45       | 84878     | 0.002553162 | 0.017554285 |
| 936Se l1.A9x8Xi9I   | MON2         | 23041     | 0.002555266 | 0.017563712 |
| HpR_L_11CrK7dP73pU  | SNRNP70      | 6625      | 0.00255798  | 0.017572195 |
| KL5dfQIJOTrX5K0e5U  | BPGM         | 669       | 0.002559641 | 0.017572195 |
| TBNRe3ob5Oirpkpd1A  | NME3         | 4832      | 0.002560195 | 0.017572195 |
| 6l5771E3T578T1.uiU  | NA           | NA        | 0.002560915 | 0.017572195 |
| i6o5v1K3F5bqOKS6Es  | ATP8B2       | 57198     | 0.002561745 | 0.017572195 |
| 9nni4eTjiMQfeDnkT0  | ANO3         | 63982     | 0.002561801 | 0.017572195 |
| lMpBPgLFi_qUrsmIRE  | CRCP         | 27297     | 0.002562521 | 0.017572195 |
| 6ogR_L7gr.qTUVSAuo  | YTHDF2       | 51441     | 0.002562853 | 0.017572195 |
| W4CHugDj.KGpkunRI4  | KLHL28       | 54813     | 0.002564127 | 0.017572195 |
| cUoHiXKidN6SQ6f8dM  | HELZ         | 9931      | 0.002564182 | 0.017572195 |
| NiFJcRLU0DE3IXTJQo  | SYPL1        | 6856      | 0.00256457  | 0.017572195 |
| 6uiuCguiSoiiW6MOgo  | PMS2P3       | 5387      | 0.00256828  | 0.017592585 |
| QXiUguq58x1QF_LtSU  | MARCKSL1     | 65108     | 0.002572101 | 0.017613722 |
| QkkzUfd7SXQkk0_QSM  | NUPL2        | 11097     | 0.00257559  | 0.017628292 |
| oFRSiFK7eC6Hu4l6k8  | ZNHIT1       | 10467     | 0.002575701 | 0.017628292 |
| Oul_OA1ZUUqWFRAiUc  | NA           | NA        | 0.002576531 | 0.01762894  |
| uVpKyvl7q65O8P1fll  | AHCYL1       | 10768     | 0.002578746 | 0.01763478  |
| xU6gErojglt33k6.M   | SPAG9        | 9043      | 0.002578857 | 0.01763478  |
| fJy64yREG6NU2p6830  | NA           | NA        | 0.002580684 | 0.01764224  |
| 3.f0gig0PehaKO3V5c  | NA           | NA        | 0.0025829   | 0.017648824 |
| E6dPsoDXuX1X_JELvk  | KPNA4        | 3840      | 0.002583121 | 0.017648824 |
| Tovv9pKpft3R5P60qo  | RHOC         | 389       | 0.002588548 | 0.01768086  |
| lHdL3lyu._qiV7.Uy4  | PAN3         | 255967    | 0.002591372 | 0.017695105 |
| HuhOnn1Z8VUmGcG8CQ  | LYRM2        | 57226     | 0.002592148 | 0.017695354 |
| QhBVdRZSwWLSV4Ak4I  | LPCAT2       | 54947     | 0.002594196 | 0.017704296 |
| 053WgoPev2bjXI5tbs  | BRSK1        | 84446     | 0.002596245 | 0.017713233 |
| 3iuuH.voA_p6jRte.4  | RBM10        | 8241      | 0.002597242 | 0.017714988 |

|                    |           |           |             |             |
|--------------------|-----------|-----------|-------------|-------------|
| EJDfpf3J7uFUpa0NXU | LINC00173 | 100287569 | 0.00260721  | 0.017769685 |
| KLj.rpSwOUIP3QFRdo | ELMO2     | 63916     | 0.00260721  | 0.017769685 |
| HNDNKeVR1G9VJE1Sus | SGSM3     | 27352     | 0.002607487 | 0.017769685 |
| x7plCD5713_g3X1SEU | ATP1B4    | 23439     | 0.002614077 | 0.017809528 |
| i1.zk_igATvp.3dhuo | NA        | NA        | 0.002617233 | 0.017825963 |
| HiCFaZ.edi6e19e5aw | DUS3L     | 56931     | 0.00261895  | 0.017830156 |
| 9X1vmlII11EiCoC7Ho | NA        | NA        | 0.002619338 | 0.017830156 |
| cpN.QldnevdKkk.1KY | LSM4      | 25804     | 0.002620501 | 0.017833004 |
| 9r8Uo7LVHviiTc.Krw | SMC4      | 10051     | 0.002621885 | 0.017837358 |
| Nk63nfuC_.jVuA3VI4 | METTTL25  | 84190     | 0.002624599 | 0.017846435 |
| 6Uo7ckVU1X6V9dOfeA | RELB      | 5971      | 0.002624709 | 0.017846435 |
| 9pU2OJP.BMdTLf9e64 | ATP1B1    | 481       | 0.002631244 | 0.017885789 |
| 06Qp9fW781eyU0.C0o | CLINT1    | 9685      | 0.002632351 | 0.017888241 |
| 9j7hf8j2u_J3u_zx9c | SPAST     | 6683      | 0.002633902 | 0.017892206 |
| cFFd_eAkevVe_CfnKg | AMD1      | 262       | 0.002634456 | 0.017892206 |
| BIDpAl9h4V_FV51dJI | FPGS      | 2356      | 0.002635176 | 0.017892206 |
| ExRdX.1CkTYF4vJKCo | CCZ1      | 51622     | 0.00264542  | 0.017956676 |
| iWqO3o54QqllCx7w5Q | UPRT      | 139596    | 0.002651346 | 0.017991798 |
| ZTgknoovoooP_WXiFU | ARHGEF1   | 9138      | 0.002654613 | 0.018008867 |
| rnSV6B65xSL1sqBfx0 | TDRKH     | 11022     | 0.002655887 | 0.018012407 |
| 9goB4H4rpdfn7xMXqw | TSPAN7    | 7102      | 0.002660594 | 0.018034494 |
| Briel_RR5HQh6QyKiM | NA        | NA        | 0.002660649 | 0.018034494 |
| NqwsZB8f9RQIHtJJ5c | MTHFD2    | 10797     | 0.002666741 | 0.018061952 |
| WhlaoZEpRfX3pKh3z8 | UPF1      | 5976      | 0.002666741 | 0.018061952 |
| raL1IUI6kEgQqdN3HI | NA        | NA        | 0.002666962 | 0.018061952 |
| iAdwVL3tXonu4VaEKU | ETFB      | 2109      | 0.002669952 | 0.018071144 |
| WfdpAEq5R.SeEB_6ul | ZNF667    | 63934     | 0.002670451 | 0.018071144 |
| KfUH1DPzU9vuhUSPk0 | NAB1      | 4664      | 0.002671115 | 0.018071144 |
| ITjoq5fy1Sd.qCeKag | APOPT1    | 84334     | 0.002671337 | 0.018071144 |
| TpBA4C7STfy9JNfp7o | MSMO1     | 6307      | 0.002672721 | 0.018075404 |
| csqv1J9VKdaX7S3f5M | MLLT6     | 4302      | 0.002674826 | 0.01808453  |
| 6Wpq1EvFJGe3SAGAGg | BRI3BP    | 140707    | 0.002676376 | 0.018089908 |
| cKgKgtuiKSoA68JJWk | CCNY      | 219771    | 0.002678923 | 0.018102018 |
| ZhNtFecYekCOKingmk | ACAP1     | 9744      | 0.002682523 | 0.018121228 |
| EUC5dcQqRJ7Wzdf6PU | SLC2A13   | 114134    | 0.002691716 | 0.018178201 |
| B9e50AOluGnpOunVI4 | VHL       | 7428      | 0.002698638 | 0.018219812 |
| foUXXeUkoMCH7k1dAA | ASPSCR1   | 79058     | 0.002700244 | 0.018225518 |
| Q4qALJ1J0FN4oKFJCG | NA        | NA        | 0.002702902 | 0.01823832  |
| IjV9anetzft18nqpcQ | NA        | NA        | 0.002704397 | 0.01824327  |
| TOU3ei.IUrv7gkr6j0 | NA        | NA        | 0.002706501 | 0.018252325 |
| KxVqhdMFQ9Icd11IQ  | RPPH1     | 85495     | 0.002707277 | 0.018252415 |
| BGEbFR3aKIXpERFLOE | GAMT      | 2593      | 0.002708439 | 0.018255117 |
| K.b_LXnvtokYqika4  | BANP      | 54971     | 0.002712759 | 0.018279087 |

|                    |          |        |             |             |
|--------------------|----------|--------|-------------|-------------|
| oWPUzpO1BPSrtzJWPo | FBXO3    | 26273  | 0.00271658  | 0.018299686 |
| QKF6IPkFAOqH16sqK0 | VAT1     | 10493  | 0.002724554 | 0.018348244 |
| 9UC54jxKTi0cZWITt4 | SNX15    | 29907  | 0.002725329 | 0.018348307 |
| 3kHf6ilhmpoWmrnqBY | TMOD3    | 29766  | 0.002727046 | 0.018354706 |
| lV6pREqEeitEvPz40Q | C16orf11 | 146325 | 0.002730258 | 0.018371162 |
| inreqMnokfHSunrgOE | ERP29    | 10961  | 0.002733027 | 0.01837617  |
| OPiynigiiq_t_e3Suk | HECTD2   | 143279 | 0.002733193 | 0.01837617  |
| BQIt_g7eOk5KJAVUgg | ASUN     | 55726  | 0.002733304 | 0.01837617  |
| Hee8SNWGSBESnbt_g  | PPFIA1   | 8500   | 0.002736737 | 0.01839409  |
| xqfqaC.N_jFfginq0  | UBE2Z    | 65264  | 0.002739395 | 0.018405349 |
| QZcruSjd.BLJCnje3o | SERPINB1 | 1992   | 0.002739949 | 0.018405349 |
| QjgYt_.d1XkKctQkpU | SNX21    | 90203  | 0.002743438 | 0.018423618 |
| 9JIqlWiEmnj83eTYTc | BRICD5   | 283870 | 0.002744601 | 0.018426262 |
| ZnHSumiuIo_VgVKLQA | NA       | NA     | 0.002746484 | 0.018433736 |
| uVnHtvPjRN7uCUcVbo | LIPA     | 3988   | 0.002748366 | 0.018441206 |
| HffXKpduN4quuXH1Hs | PPP3CA   | 5530   | 0.002749419 | 0.01844431  |
| KnMNOUeR1JSohJ6DU4 | SLC4A5   | 57835  | 0.002751634 | 0.018452791 |
| Ba_mKl6FizqfOO9eKs | FAM173A  | 65990  | 0.002753018 | 0.018456908 |
| u4hp5oR6dfUbdFKSEs | CINP     | 51550  | 0.002755012 | 0.018460034 |
| Z4DyerkuOZey1ecfql | C6orf170 | 221322 | 0.002755621 | 0.018460034 |
| KpPljUkT3Sx7rks8lQ | TCP11L2  | 255394 | 0.002756396 | 0.018460034 |
| ftBiuvvdPvurHDNGsU | OR8B2    | 26595  | 0.002756673 | 0.018460034 |
| Wom.COknhwTKX_K3.o | UBE2A    | 7319   | 0.002757337 | 0.018460034 |
| 9r9NfQCqvWliRbKn.c | PCF11    | 51585  | 0.002759276 | 0.01846269  |
| HKg7SShVNINXu3cRns | BMP1     | 649    | 0.002759276 | 0.01846269  |
| rqyD8sDPUIrb.ORCk  | EDEM3    | 80267  | 0.002760549 | 0.018466054 |
| NpfHqUR4xbReZRJNPI | WDFY3    | 23001  | 0.002761325 | 0.018466084 |
| iXX8uFL0D.DJjKyVel | TADA1    | 117143 | 0.002765755 | 0.018490548 |
| xKARB68XOIXve1u5cY | C5orf30  | 90355  | 0.002768413 | 0.018492117 |
| xX16r_gMAfelqRrp0c | FAM63A   | 55793  | 0.002768856 | 0.018492117 |
| lqR6ed7frXvBXUXXd8 | OGDH     | 4967   | 0.002768856 | 0.018492117 |
| rLIE.pLEDi3i7DJUiM | FNDC3A   | 22862  | 0.002769077 | 0.018492117 |
| EXip4AalqDqIfjPwkk | YWHAG    | 7532   | 0.002773452 | 0.01851617  |
| OVTLuKu6Ho4EK46Rv0 | NDUFV1   | 4723   | 0.002775446 | 0.018524317 |
| l1Ko4oIpInpI9i63cU | NFATC2IP | 84901  | 0.002777772 | 0.018534676 |
| Qkj0tRiXfnIXS4Qs54 | ZBTB34   | 403341 | 0.002779821 | 0.018543183 |
| 9McDUiqjtB3lAt7lRM | RBM12    | 10137  | 0.002781482 | 0.018549099 |
| i6Vlol3nd8msiQD14l | CCBL2    | 56267  | 0.002782756 | 0.018552428 |
| Z1W1.1FLdl3pfd6Udc | CNFN     | 84518  | 0.002783863 | 0.018554648 |
| ZFcKnq6e3QoRpgxvuE | ABCA3    | 21     | 0.002785691 | 0.018561663 |
| Wfd1U2dRBeAWIKL54U | TMEM109  | 79073  | 0.002797652 | 0.018636181 |
| l4dCp7l71f1FVRH65s | TMEM71   | 137835 | 0.002800476 | 0.018649808 |
| fEvlLjDeTgoAlFeQOk | KAT2B    | 8850   | 0.002803245 | 0.018663059 |

|                    |          |        |             |             |
|--------------------|----------|--------|-------------|-------------|
| B10nshK1.2OsTP3_X8 | CD69     | 969    | 0.002808838 | 0.0186951   |
| KEcvnH6gwKn.4qqzow | FAM8A1   | 51439  | 0.002809724 | 0.018695802 |
| iEEvkS5UVzpcn0rHO  | GLCC11   | 113263 | 0.002811829 | 0.018704609 |
| Brr6jN53eo6TS_pLTc | PCGF6    | 84108  | 0.002817256 | 0.018732839 |
| QpPFWHSSKdN.ktCSug | NA       | NA     | 0.002817754 | 0.018732839 |
| i5A5d9L_h0neEIXXUo | OCEL1    | 79629  | 0.002818418 | 0.018732839 |
| QnEBIUjEejXn_ebUoI | PSMC6    | 5706   | 0.002819471 | 0.018734634 |
| Bnp_L_xQBLX0H_R7l8 | PQLC3    | 130814 | 0.002823236 | 0.018754454 |
| fih3cV_WzcKJ4rDeJU | GTF2F2   | 2963   | 0.002824787 | 0.018755771 |
| In6ihOIHv9LP8UsXok | DCUN1D5  | 84259  | 0.002825784 | 0.018755771 |
| ZqBo7oKCB7RXfClSrY | PRPF19   | 27339  | 0.002825784 | 0.018755771 |
| 0KJVK2mrvVKCKCwN5A | CEP250   | 11190  | 0.00282678  | 0.01875719  |
| cs6LoBn7Cn0Uo1F3js | NA       | NA     | 0.002827888 | 0.018759343 |
| 3Hll195Z1655_7nb_s | NA       | NA     | 0.002830712 | 0.018772879 |
| xUm3oPfrV1uiAd9l60 | FAM160B1 | 57700  | 0.002832373 | 0.018778698 |
| luitCWiONJRxepe1M  | NA       | NA     | 0.002836748 | 0.018802499 |
| 6SoQUUfcwWgfeUqFRo | TLR9     | 54106  | 0.002841732 | 0.018830323 |
| TFUliF2mlewcuo.sQU | SCRIB    | 23513  | 0.002842895 | 0.018832819 |
| Wu985RfwXPV8dCjso  | ZNF254   | 9534   | 0.002850814 | 0.018880057 |
| EMOHlJeiCuEtQu5BJ4 | IGF2BP2  | 10644  | 0.002856961 | 0.018908657 |
| WfcqcNP_nT_qHf.1SA | C21orf91 | 54149  | 0.002857016 | 0.018908657 |
| lppUluz8.9FzdfXtCk | ADAP1    | 11033  | 0.002857625 | 0.018908657 |
| ficp0q4n_nqvlfuyxl | SNX21    | 90203  | 0.00285829  | 0.018908657 |
| HU_F78F85S5RLI_NLk | UVSSA    | 57654  | 0.002860893 | 0.018918722 |
| KeyPr9TEqC91tc5Dv0 | SCML1    | 6322   | 0.002861391 | 0.018918722 |
| xlbi1Qm7uYhSMncob0 | HOMER2   | 9455   | 0.002865544 | 0.018940955 |
| fpmvXIHteCO4OrrGP0 | SEMA4D   | 10507  | 0.002867206 | 0.018945872 |
| QElrAaDRs69.e6t7pE | DEF8     | 54849  | 0.00286787  | 0.018945872 |
| Hlky7_py6v3hJU6g5U | GCNT2    | 2651   | 0.002869642 | 0.018952352 |
| xKLunUp57GO70Hi0p4 | ACTL10   | 170487 | 0.002871027 | 0.018955798 |
| 3gqSEvfeq_knnT046U | STX4     | 6810   | 0.002871747 | 0.018955798 |
| TglL0tRFN33_L786XU | CYYR1    | 116159 | 0.002874682 | 0.018966911 |
| 0iOIPB8kuoXR.xCR50 | PDHX     | 8050   | 0.002875014 | 0.018966911 |
| 37Xp9V1Qoo4o65d4oA | TRPV2    | 51393  | 0.002876232 | 0.018969724 |
| WR0peFyn6i0B50z4kw | GTF3C2   | 2976   | 0.002879112 | 0.018978153 |
| 0k6v.eSfPuDF_ve9DI | RIF1     | 55183  | 0.002879499 | 0.018978153 |
| iaGe9wAK3Xkje3qe44 | SGK1     | 6446   | 0.002879887 | 0.018978153 |
| lhXEuXqnWfEMtdXe9c | RPUSD3   | 285367 | 0.002882047 | 0.018987162 |
| T65SV16l0_rNFzEgKU | FKBP11   | 51303  | 0.002882877 | 0.018987413 |
| u6F6lKhcaGXoJ5hleQ | LTBP4    | 8425   | 0.002886754 | 0.019007717 |
| Qqh_QpdF7_IOPjhuHk | HSD11B1L | 374875 | 0.002894451 | 0.019047798 |
| cS97X4NWHlz9_V3rdl | DDX21    | 9188   | 0.00289506  | 0.019047798 |
| BKfrTk5ew1yceoKeKA | MRP63    | 78988  | 0.002895226 | 0.019047798 |

|                     |          |        |             |             |
|---------------------|----------|--------|-------------|-------------|
| cn8J6457THUgJ7IR50  | C1QTNF9  | 338872 | 0.002899546 | 0.019068292 |
| 0V5eeeqiOe1O.cqs9M  | WDR83OS  | 51398  | 0.002899934 | 0.019068292 |
| N7pDE5QXqXrowUEI6o  | DHRS7    | 51635  | 0.002903312 | 0.019085265 |
| TVHvFPvfNU6gkvrxGM  | SRSF3    | 6428   | 0.002904585 | 0.019088399 |
| 09Z2pfVIJte4d6iK4Q  | CACNA1H  | 8912   | 0.002907133 | 0.0190999   |
| HgneeCRQ6SQnkgxOxl  | TAF1A    | 9015   | 0.002909458 | 0.019109939 |
| BXsNUkfoinivmUcR1l  | ADAM17   | 6868   | 0.002911673 | 0.019119246 |
| Wz9KehaYdr7hSKvi54  | ELP6     | 54859  | 0.002915439 | 0.019138726 |
| WUEHhEHXwnuv0t3nL0  | GMFB     | 2764   | 0.002919759 | 0.01916183  |
| lq7SjR1Ryod5nDxeJg  | RTN2     | 6253   | 0.002920755 | 0.019163122 |
| oJ3g10qOUXkT3The1o  | NA       | NA     | 0.002924687 | 0.019183664 |
| Qf55R5SI3leSeAfpTQ  | INF2     | 64423  | 0.002928397 | 0.019202742 |
| cVeeL6A9S5JHj4US_U  | CYBRD1   | 79901  | 0.00293399  | 0.019234153 |
| IFnwF6iuiukuFYjYjQ  | N4BP2    | 55728  | 0.002937479 | 0.019251756 |
| fVum3Rrj1514T670ew  | FBXL18   | 80028  | 0.002940414 | 0.01926572  |
| lXgKiX3H54YeXTd94o  | C8orf44  | 56260  | 0.002943571 | 0.019281128 |
| oSFSCCQDx.VeHU1iVI  | NME8     | 51314  | 0.002947226 | 0.019299791 |
| 69KffSiAkLEesX6HuQ  | SLC25A20 | 788    | 0.002949053 | 0.01930648  |
| 9kYHoe7kGf.qlOO1W8  | LDLR     | 3949   | 0.002950437 | 0.019306602 |
| HrnjXFFx5xfXyfRXpw  | ECHDC2   | 55268  | 0.002951324 | 0.019306602 |
| f3gTp1JhdJRKByISfk  | RFFL     | 117584 | 0.00295149  | 0.019306602 |
| 9WI0RR5HUF6gGS4h7k  | TNFSF14  | 8740   | 0.002952653 | 0.019308936 |
| QoNn4FqikivkuJSNuQ  | CRCP     | 27297  | 0.002960793 | 0.019356886 |
| uopJ9le.z66yefnit8  | PCNP     | 57092  | 0.002965611 | 0.019383094 |
| B.we.lHnldFXlad6LE  | NFE2L1   | 4779   | 0.00296694  | 0.019386491 |
| WooPoHIO7h3uqHkyv4  | ARL8B    | 55207  | 0.00296849  | 0.019388632 |
| uWnnFxZloZ2p5oEqaQ  | NA       | NA     | 0.002969543 | 0.019388632 |
| T4CiS6Vm4_6T8KJLpU  | TPK1     | 27010  | 0.002970041 | 0.019388632 |
| HV6OOC4Of0JAglaael  |          | 23157  | 0.002971204 | 0.019388632 |
| TiiSuS49MVHcCee46U  | APIP     | 51074  | 0.002971315 | 0.019388632 |
| KVCfdXxURc1.4qn_q4  | RNF167   | 26001  | 0.00297652  | 0.01941419  |
| NtqRB4VB.3yXS16Dlc  | FASTKD3  | 79072  | 0.002976852 | 0.01941419  |
| rd46BR5HMI6FEiSIXs  | C21orf58 | 54058  | 0.002978181 | 0.019417341 |
| oe_SglHUUSDnDOUusU  | SLMAP    | 7871   | 0.002978957 | 0.019417341 |
| Hk6gs4grn7oKqVp1co  | LSP1     | 4046   | 0.00298095  | 0.019419767 |
| HV_9dYOvfUR0Aw_Dr4  | PLAC1L   | 219990 | 0.00298095  | 0.019419767 |
| BlhLrMEp185SuS6dOU  | GOLGA8I  | 283796 | 0.002986156 | 0.019448389 |
| iA73APh6w7_7M3eDM8  | NA       | NA     | 0.002990641 | 0.019472309 |
| NuKEUkCJU.lcVlboxe4 | TTLL4    | 9654   | 0.002992967 | 0.019482157 |
| H5GQM6XRK5NMIUFUU   | TSC2     | 7249   | 0.002996068 | 0.019497045 |
| K3X3pbiqh0UpfSBfSw  | NBAS     | 51594  | 0.002998283 | 0.019506161 |
| f_e5oqXnOu55r006ls  | RPS3     | 6188   | 0.003001329 | 0.019520674 |
| Wrh6xlG0nZVWiSxvQc  | COG1     | 9382   | 0.003004098 | 0.019533379 |

|                    |          |       |        |             |             |
|--------------------|----------|-------|--------|-------------|-------------|
| iuuUy.tNXq3KAY0MBI | TSEN15   |       | 116461 | 0.003004929 | 0.019533478 |
| WnO4ouDi6X3jneHfd4 | FNDC3B   |       | 64778  | 0.003009636 | 0.019558768 |
| WXv6Netf.B71_sPeJM |          | 6-Mar | 64844  | 0.003011574 | 0.019566056 |
| idSZRxRXiu1AlIjtNA | NOC4L    |       | 79050  | 0.003015506 | 0.019583856 |
| 3rfEI9QDB1L6kVOJyg | PGM2     |       | 55276  | 0.003015949 | 0.019583856 |
| il_gAdYjuPnS7PdVSk | MAPKAPK5 |       | 8550   | 0.003021652 | 0.019615576 |
| B4.dHiKB.3FK_qTOok | PRKAA1   |       | 5562   | 0.003022538 | 0.019616012 |
| f17oLp3qRSXuqcCH4Q | C1orf35  |       | 79169  | 0.003032617 | 0.01967609  |
| cCOAioDKU6GunRI7DU | RASSF6   |       | 166824 | 0.003048178 | 0.01976638  |
| r5IW1TIZ34s31UVzWM | INO80B   |       | 83444  | 0.003048621 | 0.01976638  |
| H553RqIGKNK60K55GM | ILVBL    |       | 10994  | 0.003049009 | 0.01976638  |
| QjIAoqJx3SnkJPBLIQ | HLA-H    |       | 3136   | 0.003050282 | 0.019769287 |
| HfpTo7IFxlwriUHk8o | MANEA    |       | 79694  | 0.003055432 | 0.019797309 |
| KWWp5.9fo5U0oZdL3c | NA       | NA    |        | 0.003056872 | 0.019801282 |
| WU.npH.DqThLv3g3i0 | ZNF684   |       | 127396 | 0.003058977 | 0.019809556 |
| xfn0viFvx_ILVJKCM0 | NFATC3   |       | 4775   | 0.003067339 | 0.019858338 |
| xgjkdAkeO4oLH5Vskk | WDR55    |       | 54853  | 0.003076863 | 0.019914621 |
| 0..gjSdbqnr.rUSTBI | OCIAD2   |       | 132299 | 0.003079577 | 0.0199268   |
| foUV6nl3cp9nvTTEM  | CCDC102A |       | 92922  | 0.003083564 | 0.019947211 |
| 6STNV7ekQKiRL4XuBI | FLJ33360 |       | 401172 | 0.003085502 | 0.01995436  |
| xVTQURLmGX75fRf0V8 | DET1     |       | 55070  | 0.003089213 | 0.019972963 |
| oVKISfVKIhQKfeJKP8 | IL15RA   |       | 3601   | 0.003095692 | 0.020007991 |
| HRSSf1Sfd7irR55UeQ | GAMT     |       | 2593   | 0.003096301 | 0.020007991 |
| xkE.sqlnnLycV_VFls | EDARADD  |       | 128178 | 0.003098627 | 0.020016515 |
| BdSVG93eXuJS3L144U | ANPEP    |       | 290    | 0.003099291 | 0.020016515 |
| KkuP.NQ379QAU7dUqU | SP3      |       | 6670   | 0.003101562 | 0.020025779 |
| NSepl.peSrMvp4XQ3I | TRAPPC13 |       | 80006  | 0.003102725 | 0.020027889 |
| HntIF2IkgTiAdInehY | ALCAM    |       | 214    | 0.003108262 | 0.02005823  |
| fUQLhQgbiQlSkSWGwy | RPL36    |       | 25873  | 0.003113302 | 0.020085339 |
| f1P4j3kdTgC9H6GeqU | KHDRBS1  |       | 10657  | 0.003123546 | 0.020146007 |
| HfuS756J6Xrt1A4U4A | SLC15A2  |       | 6565   | 0.003127644 | 0.020167007 |
| lrEiM.fRlr36uiQ4RA | NA       | NA    |        | 0.003130579 | 0.020177212 |
| KVN0KLp6i3.VwfuqEU | GPSM3    |       | 63940  | 0.003130912 | 0.020177212 |
| 9rSSI.S.VKnwUgWUXQ | ZMAT3    |       | 64393  | 0.003132019 | 0.02017892  |
| 05lghrpV5IO9Mr1SVU | IGLL3P   |       | 91353  | 0.003135563 | 0.020196322 |
| x.VE8.t1OMUdCS7noU | MTRR     |       | 4552   | 0.003138277 | 0.020208366 |
| ZtSQs2tJRgIYTzdeVI | NUP35    |       | 129401 | 0.003140824 | 0.020214529 |
| ioSSItD9X9vqLqS6ro | DTX1     |       | 1840   | 0.003141489 | 0.020214529 |
| Kh15Vr0FcUn7rB8e0Q | FBXO6    |       | 26270  | 0.003141765 | 0.020214529 |
| WmmeyL16GneV9VIXWk | NA       | NA    |        | 0.003144313 | 0.020223262 |
| KilJeTKF0xX1UEcXoI | COPG1    |       | 22820  | 0.003144811 | 0.020223262 |
| Of66qAi8yhRLfR94x8 | RDH11    |       | 51109  | 0.003147912 | 0.020237771 |
| 3tuvSks6InuEARcleo | CLN8     |       | 2055   | 0.003149407 | 0.020241951 |

|                     |            |           |             |             |
|---------------------|------------|-----------|-------------|-------------|
| QResT94Iqn8wkp6kpU  | ORMDL1     | 94101     | 0.003150792 | 0.020245417 |
| xd5Xedb1eqnqHAgOrs  | PLA2G6     | 8398      | 0.003157548 | 0.020283387 |
| 6RqbXHiT464o6T7Wzo  | SUPT5H     | 6829      | 0.003159652 | 0.020291463 |
| NGpdb_6JZ58H03r154  | GET4       | 51608     | 0.003176598 | 0.02039482  |
| Kvcv3oKwl6iETCQ9Hk  | IBTK       | 25998     | 0.003179588 | 0.020408549 |
| H7cE1AHir6gCh9XXss  | CYTIP      | 9595      | 0.003182523 | 0.020421915 |
| xp6k.U0zIXeV9Isl0U  | CENPA      | 1058      | 0.003183907 | 0.020424335 |
| 0vm6uk4vvggpAp_wPxU | NR4A2      | 4929      | 0.003185347 | 0.020424335 |
| xqioggoCKQsilQSSBU  | SNRNP35    | 11066     | 0.003185458 | 0.020424335 |
| uYHTnoIByARTxL1Jd8  | DCAF6      | 55827     | 0.003186399 | 0.020424904 |
| EVUVWAO9DDtU7AF5xA  | FAS        | 355       | 0.003188393 | 0.020431363 |
| HVppq3XpC0oK.e_cMw  | ADCY7      | 113       | 0.003189113 | 0.020431363 |
| Q3_LT7x4pL4uwonp5I  | ATP2C1     | 27032     | 0.00319083  | 0.020436895 |
| 3ipKh.vh5QNx3I.0uU  | ZNF45      | 7596      | 0.003192768 | 0.020440362 |
| 9nIOLxSlkn6ivj3rbY  | ACADM      | 34        | 0.003193543 | 0.020440362 |
| H3SOCK9hKh0CXPuVpc  | GLRX3      | 10539     | 0.003193931 | 0.020440362 |
| ihJ8eSR7672id97lek  | DCTD       | 1635      | 0.003195647 | 0.020445886 |
| od3Qq3Rvkk98UilPqU  | TMEM99     | 147184    | 0.003198915 | 0.020461324 |
| cigtUAK57R.C96H6r0  | CREB5      | 9586      | 0.003200631 | 0.02046684  |
| 6n7d4z1SyfV3u4oCjl  | NA         | NA        | 0.003202293 | 0.020471998 |
| IUUCvC4rVfj4ofRV_M  | DCTN1      | 1639      | 0.003203677 | 0.020475384 |
| 9nS.VyOIWdQgSdIJQo  | NA         | NA        | 0.003205228 | 0.020476845 |
| xUpfeP0K1id7Xe0tOY  | SLC4A1     | 6521      | 0.003205615 | 0.020476845 |
| NVYJCU4IUiSySiH4gs  | NFX1       | 4799      | 0.003207941 | 0.020483846 |
| ugt6isczSey_rD1C54  | TMEM106B   | 54664     | 0.003209935 | 0.020483846 |
| 6SigiHnodV4isq.uco  | SND1-IT1   | 27099     | 0.00320999  | 0.020483846 |
| Ep5AqDKeOie97Ose7o  | LAX1       | 54900     | 0.003210544 | 0.020483846 |
| 3RSV_0DjtU3wU7kP7U  | RNF103     | 7844      | 0.003210987 | 0.020483846 |
| fXRI7AVJL8olQroKNk  | PCED1B-AS1 | 100233209 | 0.003213257 | 0.020489026 |
| NUI.2l3H1FJH6SnXJ4  | TMEM161A   | 54929     | 0.003214365 | 0.020489026 |
| rQDRRe0ApK6dSKrQhU  | RPTOR      | 57521     | 0.003214365 | 0.020489026 |
| TSXlCye0Uye9NFOXJ0  | ZNF571     | 51276     | 0.003218684 | 0.020511101 |
| 60le8soO6c6euXfctE  | MYCBP      | 26292     | 0.003222118 | 0.020525774 |
| 0KbofHPz54OHFBLiJU  | CD69       | 969       | 0.003222727 | 0.020525774 |
| cJywWnuKiKtIJHyb6U  | ZNF3       | 7551      | 0.003223557 | 0.020525774 |
| 3CxBSZ.pBjqeTiWeh4  | PUS1       | 80324     | 0.003225163 | 0.020530542 |
| WihIT5WgHS3Pz30n5U  | TACSTD2    | 4070      | 0.003226326 | 0.020532488 |
| oHz_GGHfWF4AkZeqI0  | NA         | NA        | 0.003229483 | 0.020547118 |
| fk8LHrQKQoHp6u66dU  | AGPHD1     | 123688    | 0.003234245 | 0.020568606 |
| ZrV6iUnohK617AJ.PU  | OAT        | 4942      | 0.003234577 | 0.020568606 |
| ZfczqFYPIR54NexJfE  | DEGS1      | 8560      | 0.003235962 | 0.020571948 |
| 6qL.lchTo_5CDgee_o  | FAM120A    | 23196     | 0.003242441 | 0.020607669 |
| rm4nlOzZSW_f7x4G5Y  | PBX4       | 80714     | 0.003246096 | 0.020625425 |



|                    |           |           |             |             |
|--------------------|-----------|-----------|-------------|-------------|
| TTVSIXfu9eUTJ5Sp8I | FAM127B   | 26071     | 0.00324964  | 0.020642469 |
| QJE7xf3_4pDoutyj4k | ZNF514    | 84874     | 0.003251024 | 0.020645788 |
| B1URgQDUAUDVXVxaJY | LRFN1     | 57622     | 0.003252298 | 0.020648403 |
| rVaip72pSZWWnnWZ4Q | CDKN2D    | 1032      | 0.003258999 | 0.020685462 |
| HStyUIDxCc97yeoud0 | SOX6      | 55553     | 0.003261491 | 0.020694881 |
| iqkxJTFPeCu3zdd43I | SAA1      | 6288      | 0.003262211 | 0.020694881 |
| oolS7Qt56DkoLIEg2U | GORASP1   | 64689     | 0.003263927 | 0.020700289 |
| xhfxSSl1UUjleZ6MXA | PRRC2A    | 7916      | 0.003269908 | 0.020727244 |
| ibqN5Ebf7S_6043y0U | ARHGEF18  | 23370     | 0.003269908 | 0.020727244 |
| OJQL13K1YLbpKKK2rA | ZRSR2     | 8233      | 0.003279821 | 0.020772653 |
| H6qVIJ5ANY4h5ZQsCU | HSPB1     | 3315      | 0.003280097 | 0.020772653 |
| xUIIYiievUhQlIiggo | DDX27     | 55661     | 0.00328054  | 0.020772653 |
| 6vSskuJPvTOIOmnq40 | SLC30A9   | 10463     | 0.00328054  | 0.020772653 |
| 0WVfb2VtVeWT0Q5Jec | NA        | NA        | 0.003284805 | 0.020788428 |
| 3rGk0laEk017GpIk2k | FAM108A3P | 100289252 | 0.003285192 | 0.020788428 |
| ocv.0ZeQ36Lcr5ft3U | SOWAHC    | 65124     | 0.003285635 | 0.020788428 |
| TGdtzlx6FO4l6R9VEE | CCDC167   | 154467    | 0.003289401 | 0.020804416 |
| x2Kw3H_iHeXoirS9cl | ELP3      | 55140     | 0.003289899 | 0.020804416 |
| 0eCAQZLtGQIHSEJUqs | UHRF1BP1L | 23074     | 0.003291284 | 0.020807678 |
| Q2I46lekJu6kKx5OXU | EXOSC7    | 23016     | 0.003294939 | 0.020819795 |
| 9q37X0X.C9KgS.teFE | VPS4B     | 9525      | 0.003294939 | 0.020819795 |
| oJx6x1UkUXTHCD10d4 | ITPR2     | 3709      | 0.00329804  | 0.020833894 |
| iKEl5O6d7eDt.sicXo | ZFR2      | 23217     | 0.003300975 | 0.020842243 |
| ORPgSe4hITPiOXlfl  | SRP72     | 6731      | 0.003301362 | 0.020842243 |
| fioZFk3UpE1ACjoYhE | GCNT2     | 2651      | 0.003301971 | 0.020842243 |
| 0KCd4o6_S4oJOrfwoc | ASTN2     | 23245     | 0.003304242 | 0.02085108  |
| 0SISAPu1SCjtLD7hyk | RAB14     | 51552     | 0.003312548 | 0.020893188 |
| rsm01X657XpDLh934o | ZNF616    | 90317     | 0.003312659 | 0.020893188 |
| iJ9klk7oKFoN6G61kl | RBM42     | 79171     | 0.003314597 | 0.02089825  |
| ufoKlCqviCSS_UiSX8 | NOP2      | 4839      | 0.003315207 | 0.02089825  |
| Qv5RB7311D15AdvUnY | RPAP3     | 79657     | 0.003317532 | 0.020907409 |
| T5S.6qH2F.h0NHMVfQ | NA        | NA        | 0.003319304 | 0.020913075 |
| xHfSR.SJz4zkztRcsU | FPGT      | 8790      | 0.00332523  | 0.020944898 |
| 9Xolbq5F7x76n9R4jc | RARA      | 5914      | 0.003329826 | 0.020963522 |
| Qxd9ESECP1kz9kHp10 | NA        | NA        | 0.003329937 | 0.020963522 |
| uVL9Hd_ER88oKj59Ho | MGAT2     | 4247      | 0.00333182  | 0.020969864 |
| lV3AVTwoeoikiQl0iU | SEPHS2    | 22928     | 0.003335364 | 0.020986656 |
| rwR3JV5Xz6qEjrV7Xk | PAK4      | 10298     | 0.003336582 | 0.020988809 |
| T0QuIf47.pVUIAHw60 | PCGF5     | 84333     | 0.003338299 | 0.020994095 |
| 9Togg1I5cY8QQp0rll | ANKZF1    | 55139     | 0.003339572 | 0.020996592 |
| 3dJFduAehCCUuiFBrU | CCNT2     | 905       | 0.003341954 | 0.021003671 |
| c6lkYvL7LWn5rqnh9c | BCAP31    | 10134     | 0.003342452 | 0.021003671 |
| BV566d7Xe8pFEevrQc | COPS6     | 10980     | 0.003346218 | 0.02102182  |

|                    |          |           |        |             |             |
|--------------------|----------|-----------|--------|-------------|-------------|
| oub1CSIkCyU_4IJe_U | ZNF613   |           | 79898  | 0.003349651 | 0.021037872 |
| rSFab6S7JTB.eO8sAE | DDX3X    |           | 1654   | 0.003354801 | 0.02105609  |
| KS9USpO4f4CicilEdl | BTN3A2   |           | 11118  | 0.003354801 | 0.02105609  |
| BneLtRq4ILi7UauCC4 | GALNT11  |           | 63917  | 0.003355189 | 0.02105609  |
| NkkihUoUS4RGAoBKcl | DHX40    |           | 79665  | 0.003362166 | 0.021094352 |
| 3pRFCSgkQHVUJ4dNcE | CSF1R    |           | 1436   | 0.003363828 | 0.021099249 |
| NolX6LOn.ROp9zFn2E | NA       | NA        |        | 0.003368922 | 0.021121533 |
| IV.9_MUdNRu9ePtRP0 | RAD51AP1 |           | 10635  | 0.003369144 | 0.021121533 |
| QIBR4q7nvq19J12rrl | NA       | NA        |        | 0.003371193 | 0.021128848 |
| WiU576kCQd.9BR500s | WDR37    |           | 22884  | 0.003373242 | 0.02113202  |
| H5OvxXeLzv33LiTI54 | SPCS3    |           | 60559  | 0.003373463 | 0.02113202  |
| 0pxR6i0o04vTffX3x4 | SRI      |           | 6717   | 0.003375401 | 0.021138634 |
| 94gYDdn0tHeWCmeGk0 | SDF4     |           | 51150  | 0.003378281 | 0.021151138 |
| ccpH8iuR_TpKepVf9w | TNRC6B   |           | 23112  | 0.003382102 | 0.021169528 |
| 6p_X8jaueM_Xv1yw6k | MMD      |           | 23531  | 0.003383154 | 0.021170582 |
| xkuNKteQkuqCqlCs_g | ICAM1    |           | 3383   | 0.003389633 | 0.02119937  |
| Bipe51ESW6.3j.RTIY | NPM3     |           | 10360  | 0.003389689 | 0.02119937  |
| BTc8ulf_kkonSMRU6l | PWP1     |           | 11137  | 0.003391129 | 0.02119937  |
| BVKs8ehc7rs_8BS7X4 | ARGLU1   |           | 55082  | 0.003391295 | 0.02119937  |
| f0kn6S3TtV8XR_3clk | ATP5G2   |           | 517    | 0.003395005 | 0.021217026 |
| KCKe7kIPi1Sqh6Dvt4 | TTTY6    |           | 84672  | 0.00339866  | 0.021234328 |
| fHXdQ1RFNKCCuXtqnQ | RYK      |           | 6259   | 0.003400598 | 0.021240893 |
| oRLB15eQ1Sx.qKdn4k | DCLRE1C  |           | 64421  | 0.003401484 | 0.021240893 |
| NX51b4lGe3rq493lel | NUDCD3   |           | 23386  | 0.003403035 | 0.021245037 |
| Ql1H6oV5du2383lzx0 | SPOCK2   |           | 9806   | 0.003405527 | 0.021255055 |
| 9186q1LuQ6ewEkn1_s | SNORA70B | 100124537 |        | 0.003408074 | 0.021265413 |
| H5_opko6RaRNwTcR90 | NSUN5    |           | 55695  | 0.003410012 | 0.021271966 |
| rKKWH6loKKSKAmIIKU | PAX3     |           | 5077   | 0.003413667 | 0.021289221 |
| WuH3ixLwvXXP5R6nvo | YPEL5    |           | 51646  | 0.003417211 | 0.021303968 |
| IRZJJCgJOYFUBekLRc | PRDM2    |           | 7799   | 0.003418319 | 0.021303968 |
| i_6CT4kDUKSC06A0uA | NA       | NA        |        | 0.003419482 | 0.021303968 |
| 0EmViEh5oFvX75fX3g | SNORD83B |           | 116938 | 0.003420091 | 0.021303968 |
| uk7WTU553pd3ioPr10 | TTC39C   |           | 125488 | 0.003420478 | 0.021303968 |
| 3tSO5d.p6q966G.Quk | SDCCAG3  |           | 10807  | 0.003422804 | 0.021307718 |
| BNREv1FdF5VdMaL6Oo | CLK2     |           | 1196   | 0.00342286  | 0.021307718 |
| iSJ9ckIYIOBFgOzSFU | TSC22D3  |           | 1831   | 0.00342441  | 0.021311832 |
| rIKL13IJ7otrbRboll | ZNF839   |           | 55778  | 0.003427567 | 0.021325936 |
| Hnle6t_dDHvTF6liCs | TTC31    |           | 64427  | 0.003429893 | 0.021334866 |
| 9GC1qKOO2nqHqFN70c | IFT43    |           | 112752 | 0.00343244  | 0.021345168 |
| Hh6pXdf3O10NeXh360 | ARHGEF19 |           | 128272 | 0.003439085 | 0.021375011 |
| lqNiFOEqlljpcAil   | SNRNP35  |           | 11066  | 0.003439307 | 0.021375011 |
| xt5JSXnYB.LaXjp8ig | TAX1BP1  |           | 8887   | 0.003439916 | 0.021375011 |
| WqV5Oy7qKde8nXR7rA | TSPAN7   |           | 7102   | 0.00344346  | 0.021391485 |

|                    |          |           |             |             |
|--------------------|----------|-----------|-------------|-------------|
| lLpe54luklCSHoq4Ec | TIPRL    | 261726    | 0.003446672 | 0.021399261 |
| cqjd64_o4Ad6XwCtR8 | TRIM13   | 10206     | 0.003447059 | 0.021399261 |
| lF4mVW8X4H4qF73UX0 | MAN2B1   | 4125      | 0.003447392 | 0.021399261 |
| 6dqTX1Sr6t8RAyCnfk | FAIM3    | 9214      | 0.00345088  | 0.021415367 |
| WJ7QqSSPNJkDUgAV7k | STX7     | 8417      | 0.003451822 | 0.021415662 |
| rVexXMHsNPRfq_lr_0 | MTMR9    | 66036     | 0.003459575 | 0.021457456 |
| cn7uRXbqvCmJ716.Ak | MAMLD1   | 10046     | 0.00346035  | 0.021457456 |
| NgashCh4j5d4fXXVeo | HDAC3    | 8841      | 0.003463285 | 0.021470098 |
| NLqU5R5d7_dXFSUe0o | MED26    | 9441      | 0.003466663 | 0.02148301  |
| 33e355aX4xRV0Vki0c | CSAD     | 51380     | 0.003467161 | 0.02148301  |
| cSTq0sTX2mLI8dw_AU | DPY19L3  | 147991    | 0.003473696 | 0.021515113 |
| rs1P5F3j3ncan9XpHo | UNC50    | 25972     | 0.003474139 | 0.021515113 |
| ridSViJc88kuKIJJ4  | C21orf59 | 56683     | 0.003475357 | 0.021517095 |
| ci3v57w.f7qpJKJd0k | MPC2     | 25874     | 0.003476354 | 0.021517705 |
| ZNUn_KKV46EFXV6T28 | XRCC1    | 7515      | 0.003479621 | 0.021532364 |
| 04TIFWDp0f0eKOe13g | TMBIM6   | 7009      | 0.003486599 | 0.02156997  |
| H3q6RqorTiAbo8RVfs | DANCR    | 57291     | 0.003490032 | 0.021585636 |
| 03R393nvkDE6MEW8PU | CCL4L1   | 9560      | 0.003492801 | 0.021597185 |
| KnKH0P8ANLsXKS5EkY | OPA1     | 4976      | 0.003495791 | 0.021610097 |
| BwuX4noOqCqhCrS3to | TMBIM1   | 64114     | 0.003497896 | 0.021613661 |
| 61nKjfoEzVU6MKiqx4 | KRBOX4   | 55634     | 0.003498173 | 0.021613661 |
| 0sh4CRNe56miSe7_jo | SRA1     | 10011     | 0.003499834 | 0.02161835  |
| cS1LgHuSoDgrIP_orA | C18orf32 | 497661    | 0.003506645 | 0.02165484  |
| EevSlaKKv5qy_RoQ9o | DAPK3    | 1613      | 0.003509248 | 0.021665327 |
| Qq47SrjBSE9OgKTkv4 | CLK4     | 57396     | 0.003516669 | 0.021705546 |
| NfX56O6SDURSfNBQRI | EVI2A    | 2123      | 0.003520157 | 0.021721482 |
| l6up6QiuLkl.hVB19w | UFSP1    | 402682    | 0.00352204  | 0.021721994 |
| xxT4gidRSSF45c4ERE | BCAP29   | 55973     | 0.003522262 | 0.021721994 |
| fdSdSXT_fiH_7s6qH4 | VNN2     | 8875      | 0.003523868 | 0.021721994 |
| Wegr.fudqlguKglpLU | CLUHP3   | 100132341 | 0.003523868 | 0.021721994 |
| HcrSUFVNQV8h0YEDUU | CLEC5A   | 23601     | 0.003525473 | 0.021725703 |
| oUL016nU_reU_ae0_Y | IFI27    | 3429      | 0.003526969 | 0.021725703 |
| xnglek116qfz3qPOpE | PIGK     | 10026     | 0.00352719  | 0.021725703 |
| 0uPXskHX_e4enOF_al | WDR54    | 84058     | 0.003531011 | 0.021743174 |
| BUle1eUVdquqHLg4fg | PRKCSH   | 5589      | 0.003531842 | 0.021743174 |
| rXKX4dWeXniqQwFIFA | EML3     | 256364    | 0.003533116 | 0.021745426 |
| 9op4popKPn4zioj4p4 | ZNF526   | 116115    | 0.003537269 | 0.021760829 |
| fdfUuthOJGh1wF.1GU | GREB1L   | 80000     | 0.003537435 | 0.021760829 |
| NSh3vFwjuMJ6nkpr0k | PFKFB2   | 5208      | 0.003538709 | 0.021763075 |
| fqF.okSXGNeuQpa6OQ | MAP2K3   | 5606      | 0.003543637 | 0.021784243 |
| 9pXn7lO6O.uJdrXEkc | PDXK     | 8566      | 0.003543969 | 0.021784243 |
| 61sopC9fjugy5BezOo | FNBP1L   | 54874     | 0.003546517 | 0.021794309 |
| HISi9AnsuJ7T7lHNdQ | DBT      | 1629      | 0.003547901 | 0.021797225 |

|                    |          |        |             |             |
|--------------------|----------|--------|-------------|-------------|
| r4UKUSJzq7SRSj_CUo | HSH2D    | 84941  | 0.003556762 | 0.021840457 |
| 6ILTSNBE9HUExqzApg | METTL9   | 51108  | 0.003556762 | 0.021840457 |
| 0UpS43H3.0c.Ppfl30 | CLEC10A  | 10462  | 0.003559364 | 0.021850838 |
| H1zX.SopA_RuL8LOck | FAM122A  | 116224 | 0.003562742 | 0.021865971 |
| HlFF8ErtMjsn_q0rIE | NA       | NA     | 0.003567782 | 0.021891291 |
| NpegRdSUQIJQK0tXec | SLC25A29 | 123096 | 0.003569831 | 0.021898254 |
| xoT3o8_9ST5EtUcBfs | EXOC1    | 55763  | 0.003573319 | 0.02191369  |
| IOVVljl.LsLJ6fq5Ok | ATPAF1   | 64756  | 0.003574814 | 0.02191369  |
| cglUSICkSXnQXnjgXk | PSMA1    | 5682   | 0.003575091 | 0.02191369  |
| KV7SOAOPRJ3pL1Qt6o | GCN1L1   | 10985  | 0.003576587 | 0.021917246 |
| EHVCiHwg6SOi6UO_JE | NT5C3    | 51251  | 0.003590929 | 0.02199951  |
| 3QMpVUtUlu56SMq_zw | PPP2R5D  | 5528   | 0.003596356 | 0.022027124 |
| Noo4pFPUogI9aSY4I8 | NUCKS1   | 64710  | 0.003598239 | 0.022032609 |
| xjEtHB9N7VbIX1SteU | C19orf53 | 28974  | 0.003599291 | 0.022032609 |
| WSzete5VJ5QKluqIOU | AATK     | 9625   | 0.003600011 | 0.022032609 |
| WqsRHil_OME_gOO7a0 | ANKRD32  | 84250  | 0.00360134  | 0.022035113 |
| KAgqVifL9VKHpcoKJE | RIN3     | 79890  | 0.003607653 | 0.022060562 |
| 3uTQVI1IgmFibRc784 | NEK7     | 140609 | 0.003607653 | 0.022060562 |
| fDRRWBUlpoqWeK6DRQ | NA       | NA     | 0.003608262 | 0.022060562 |
| OSUKoATp33nUAB4qrU | NFATC1   | 4772   | 0.003612416 | 0.022078748 |
| 6ZmPadl6XF0RH2KKOw | C1orf228 | 339541 | 0.00361308  | 0.022078748 |
| 3PUIGpVKAlue0k0k00 | AGER     | 177    | 0.003617566 | 0.02210052  |
| x65aXRiHVTIIUQiv00 | NAIP     | 4671   | 0.003619448 | 0.022106385 |
| WneJlLqz74xloL3_UY | NLE1     | 54475  | 0.003620667 | 0.022108189 |
| EpRLux56DvU1AI7J9I | SCAF11   | 9169   | 0.003626038 | 0.022135346 |
| 9duCVEKHgRVRfj8heY | NA       | NA     | 0.003627478 | 0.022138493 |
| ipuBoOoq_3JO1LOLro | HNRNPH1  | 3187   | 0.003628475 | 0.022138936 |
| EpV5CR.H1711UI8FUA | CC2D1A   | 54862  | 0.00363069  | 0.02214681  |
| iiFLI.OOoDsXJCevfk | FCHO2    | 115548 | 0.003633846 | 0.022160421 |
| QnXJTIn1.UgV9R5UO4 | PIK3IP1  | 113791 | 0.003635065 | 0.022162209 |
| Ha6KVKb5yj5NL.Xv5E | MID1IP1  | 58526  | 0.003638443 | 0.022177159 |
| NDrblACpZpRuSXPZ5E | RPS26    | 6231   | 0.003643981 | 0.022205263 |
| HXfUJXm1JibRJEf5AA | LMNB2    | 84823  | 0.003646362 | 0.022210247 |
| Ko6INenlO6_OUIXUiA | CMPK2    | 129607 | 0.003647469 | 0.022210247 |
| Bi95SVai3iezSCis1Q | POLD1    | 5424   | 0.00364758  | 0.022210247 |
| B0eNxJV72m0i1UchUs | CYP2S1   | 29785  | 0.003651899 | 0.022230897 |
| rS4URJ11OXhQSISf1c | MRPL28   | 10573  | 0.003653616 | 0.022235697 |
| 67ITiJlh6CpCFK5woo | IKZF4    | 64375  | 0.003655942 | 0.0222442   |
| 3HkEmvl6bQoEHJN0I4 | RNF6     | 6049   | 0.003670008 | 0.022318503 |
| x8exISAAel7JV3XoLk | SLC25A13 | 10165  | 0.003670783 | 0.022318503 |
| BVfXJ7OF_Pu5fBZ3uE | DNASE2   | 1777   | 0.003670949 | 0.022318503 |
| ZgH.OB94ntV_Q9BZL8 | NNT      | 23530  | 0.003686621 | 0.022408096 |
| r6Sflrvp.v6Ow.yqwx | PLCL1    | 5334   | 0.003687784 | 0.022409478 |

|                    |           |        |             |             |
|--------------------|-----------|--------|-------------|-------------|
| iCFcx3S3VQVFCie6g  | ZNF384    | 171017 | 0.003689168 | 0.022412206 |
| iIV8SSCEeSdghJ8Lpl | CACNA2D4  | 93589  | 0.003703788 | 0.022495316 |
| 3_kIS4goe5yDop0Xno | CLEC4A    | 50856  | 0.003709492 | 0.022524248 |
| ZYO6cW6tBeo7Jrgixl | UCP3      | 7352   | 0.00371586  | 0.022553837 |
| K1U7EnOFSeKB5OKeJl | C6orf1    | 221491 | 0.003716248 | 0.022553837 |
| Wo9eLx7.vXVR59U9eI | FNIP1     | 96459  | 0.00371946  | 0.022567612 |
| cbfiOkT1xj4IKrfiNU | NCK2      | 8440   | 0.003721232 | 0.022572647 |
| oRS5HUnqYSJiHU3YAA | RPL7L1    | 285855 | 0.003723447 | 0.022580014 |
| rVIRVJVzu79XQwojl8 | KCNG1     | 3755   | 0.003724942 | 0.022580014 |
| EiECONmltpI9dCDI6g | NDUFA3    | 4696   | 0.003725274 | 0.022580014 |
| W.c.1dnqkuV1xVSr4o | NELFA     | 7469   | 0.003739395 | 0.022642239 |
| iRVKCIWyF1gh1EIBw4 | ACSM5     | 54988  | 0.003739395 | 0.022642239 |
| f9umu8eFepuuHNsel8 | ICAM3     | 3385   | 0.003741278 | 0.022642239 |
| rK1xzZdXct3n3ejV4o | HMBS      | 3145   | 0.003741555 | 0.022642239 |
| EkU_5JFwqv5mcd7wA  | ZBED5     | 58486  | 0.003741998 | 0.022642239 |
| Eks.sXUg6SNXSSgQKQ | ANKMY2    | 57037  | 0.003742109 | 0.022642239 |
| KZTRJ4H74jVbvHlzSQ | STAT1     | 6772   | 0.00374305  | 0.022642239 |
| xJ2IH3eCip6vepezYM | PICK1     | 9463   | 0.003743715 | 0.022642239 |
| HbAOqtXx5PNCocKleo | RPL7A     | 6130   | 0.003744047 | 0.022642239 |
| i_m4eiloSEJlJudQRM | CCDC94    | 55702  | 0.003751135 | 0.022677609 |
| EueEEqfOK3OxfDdv3U | NFXL1     | 152518 | 0.00375252  | 0.022677609 |
| WpKTu0iV9ES6jHC7_Y | LINGO2    | 158038 | 0.003753516 | 0.022677609 |
| IU4KXakRxiLECy6tnk | NA        | NA     | 0.003753683 | 0.022677609 |
| K4f_6XqoqsudRJ.19U | NCOA3     | 8202   | 0.003759442 | 0.022706676 |
| NXnC1nXnUACp1ACmuE | HIST1H2BF | 8343   | 0.003765256 | 0.022736063 |
| Zqc8g6i5AHjkslfgk  | HNRPLL    | 92906  | 0.003767582 | 0.022744374 |
| K4.u.0u7qgnteqnqmE | FAM53B    | 9679   | 0.00377384  | 0.022776411 |
| u8e7i_5DOSQLLSg2N0 | NA        | NA     | 0.003779156 | 0.02280275  |
| xuYqyOvXkRILxRKRss | EXOC6     | 54536  | 0.003780319 | 0.022804023 |
| EW12N7GA7gO.KhN1Oc | WRB       | 7485   | 0.003783586 | 0.022816917 |
| Tkm0dxcO3R73kCukOc | SMAD4     | 4089   | 0.003784362 | 0.022816917 |
| Tq35TvegdMpOLDfXI0 | YY1AP1    | 55249  | 0.00378641  | 0.022823526 |
| oklUggPKrwJISOR6.o | EGF       | 1950   | 0.003791727 | 0.022843039 |
| iaS4eBWh_teFUKEU08 | DMAP1     | 55929  | 0.003792779 | 0.022843039 |
| ui7IehIRKnH3i6KJIQ | WDR12     | 55759  | 0.003793831 | 0.022843039 |
| WoT8k8ne7ideWv36e0 | TRPC4AP   | 26133  | 0.003794939 | 0.022843039 |
| B1JepBESohXt1EA7yU | DCLRE1C   | 64421  | 0.003795658 | 0.022843039 |
| KAIKBDrbIACpZpRuSU | NA        | NA     | 0.003796157 | 0.022843039 |
| 36U54eVFuSkIBN7Un4 | SCNM1     | 79005  | 0.003796323 | 0.022843039 |
| NdUI5Z1oiWVlijmGRY | WHSC1     | 7468   | 0.003803245 | 0.022874532 |
| 33obrCQopAnZlAmA1Y | HIST1H2AC | 8334   | 0.003803467 | 0.022874532 |
| T6feh8YgSlp375A4S4 | PPP2R3C   | 55012  | 0.003807121 | 0.022890425 |
| rJdVC9Q6P5fdAOxBwk | C1GALT1C1 | 29071  | 0.003810167 | 0.022890425 |

|                    |           |        |             |             |
|--------------------|-----------|--------|-------------|-------------|
| iIddSFKBVIKISJeUTU | FAM102A   | 399665 | 0.003810333 | 0.022890425 |
| fJTSdU153UqEGeeACk | LOC389634 | 389634 | 0.003810444 | 0.022890425 |
| Ku.kHqiEgHuvjJS0eU | MYB       | 4602   | 0.003810887 | 0.022890425 |
| QQtwGQicj4lPgh19U  | AIG1      | 51390  | 0.003814653 | 0.022907299 |
| 9lKpy_uvxE.qpxetE  | ARAP2     | 116984 | 0.003817588 | 0.022919179 |
| rkRY6.Xs0SVAivd66U | GHDC      | 84514  | 0.00382667  | 0.022967946 |
| ZklK7rq05ew3SQ.qKU | NA        | NA     | 0.003830435 | 0.022984463 |
| Elfl315U7j5rksv3vs | CANX      | 821    | 0.003833038 | 0.022984463 |
| OjF7DVJxuop4rqIPn0 | SPTLC1    | 10558  | 0.003833204 | 0.022984463 |
| uw5ph2SHf6HQg9f4W0 | ANKFY1    | 51479  | 0.003833259 | 0.022984463 |
| uqErQ72dFfSIonki0k | POLR3H    | 171568 | 0.003836859 | 0.023000288 |
| x9dVnIVRhXF_CIVEDA | ISYNA1    | 51477  | 0.003848654 | 0.023065224 |
| TTs7uS55DISEBuJEVE | GPATCH2   | 55105  | 0.003853306 | 0.023082547 |
| xkf6inikhIOYLSiNiE | CYCSP55   | 157317 | 0.003853472 | 0.023082547 |
| 9ndXu0z.HCP_5dO3Hk | FAM133B   | 257415 | 0.00386056  | 0.023119225 |
| ZesSOBlDk_4_OsIR2U | NA        | NA     | 0.003862443 | 0.023122919 |
| c5_Sze.d9cp0L64VCU | WSB1      | 26118  | 0.003863108 | 0.023122919 |
| HRHtFKvP5Nqj6D4sU  | BAMBI     | 25805  | 0.003870861 | 0.023163536 |
| Wqden_XeTh9d5Sd14w | CLN3      | 1201   | 0.003876288 | 0.023190218 |
| xV6LUhxH0g9KSd9F3o | TTC39B    | 158219 | 0.003882545 | 0.023221855 |
| iVu_fQHiEjqHwSkOq0 | IRF4      | 3662   | 0.0038862   | 0.023233107 |
| i_UL3nnXnXq.gjKpY0 | TOLLIP    | 54472  | 0.003886366 | 0.023233107 |
| BpQ7rzgQj_zrSfe9.U | OTUD6B    | 51633  | 0.003887418 | 0.023233598 |
| oHgJ3l9aDV3C3n4yLo | ANXA7     | 310    | 0.003889135 | 0.023238061 |
| 9U_oB4UUVEHWUuAeVI | NA        | NA     | 0.003891572 | 0.023246821 |
| Kf7KZTSUf8glNJS7vo | ARHGEF3   | 50650  | 0.003901207 | 0.023295408 |
| Wvf30p_7fy_bp5kpeU | GGNBP2    | 79893  | 0.00390165  | 0.023295408 |
| 0cKL9ey17Di_IdLTVY | HIST2H2BF | 440689 | 0.003903533 | 0.023300842 |
| feKq_ujPqQpKAXeiF0 | PMVK      | 10654  | 0.003904696 | 0.023301129 |
| xnrgFWCNBGfQHSVfoE | AIM2      | 9447   | 0.003905527 | 0.023301129 |
| QnglKoVFBKfChYhEhM | WDR83     | 84292  | 0.003910787 | 0.023322551 |
| 33oGKI_9VI0KWKji50 | PGAM2     | 5224   | 0.003911064 | 0.023322551 |
| cohpuKQJELEVNdLA2I | DHX29     | 54505  | 0.003913279 | 0.023329952 |
| WeuelgBf76TX5XqHuU | SNORA37   | 677819 | 0.003918873 | 0.023357483 |
| Qh16B5UD6lqLIAdeq4 | EXOSC9    | 5393   | 0.003923469 | 0.023379061 |
| EVIGK19gMn1iNC5hP4 | NA        | NA     | 0.003933769 | 0.023429771 |
| KfV5dlAaDd7e4X3XIU | TBC1D20   | 128637 | 0.003933935 | 0.023429771 |
| cQCXhyS6TU758ovr_g | EVI2A     | 2123   | 0.003935264 | 0.02343186  |
| Ht3EJkrhd6N9fgKopl | RRP8      | 23378  | 0.003940137 | 0.023444383 |
| Z.kCpQP1UB4Gp0oDvU | PSTPIP2   | 9050   | 0.003940137 | 0.023444383 |
| l3sl3kxx6e00RSbEsk | STAM      | 8027   | 0.003940303 | 0.023444383 |
| u_iyXD0oMVCT5Cm5Lk | ZBED5     | 58486  | 0.003948832 | 0.023486423 |
| Nnf_8yrOjT7SB_Poqs | AFTPH     | 54812  | 0.00394933  | 0.023486423 |

|                    |          |        |             |             |
|--------------------|----------|--------|-------------|-------------|
| OXpPp_uuiXOjCuigoU | RDM1     | 201299 | 0.003950659 | 0.023488495 |
| fSvR6hSpxKRIt16AKg | UNC13D   | 201294 | 0.003956141 | 0.023515254 |
| BqwYWft.rdwVw3ep_U | GPATCH3  | 63906  | 0.003959519 | 0.023529494 |
| 31UV1P.6M8BKgJ_cTw | ACAP2    | 23527  | 0.003963063 | 0.023544714 |
| EEplrACOOgruuHCpRo | CCT6A    | 908    | 0.00397364  | 0.023597631 |
| 3V0_ElOXiOX1C_9Tqc | EIF6     | 3692   | 0.003975136 | 0.023597631 |
| Q4hQpSTQ9SE3071wyk | EFHA1    | 221154 | 0.003975689 | 0.023597631 |
| c6PIOQqfk8w8fIH4O4 | RAP1B    | 5908   | 0.003975911 | 0.023597631 |
| 6utQ8ArpUEtRV4AKa0 | NA       | NA     | 0.003978237 | 0.023605587 |
| cnS.yrcL4XYuJTkAMk | CUL3     | 8452   | 0.003980563 | 0.023613538 |
| 6k7fke9BdeLrZ.BBdQ | FBXO28   | 23219  | 0.003984661 | 0.023631995 |
| E3V5VWhllSfn7swvs8 | PPP1R14A | 94274  | 0.003992579 | 0.023673099 |
| fEHpaky0u1SRTtLoDE | PIWIL4   | 143689 | 0.003993909 | 0.023675119 |
| xeunif.VJKDq12DTbk | SNRNP25  | 79622  | 0.003996013 | 0.023681733 |
| 3VKK6C_f4liPkU_x1l | PCDHB9   | 56127  | 0.004002603 | 0.023710081 |
| x0pEO_gxKCyV5F5S4k | DSTN     | 11034  | 0.004003544 | 0.023710081 |
| 05XeX4.r6D.5wPrDvk | FAM135A  | 57579  | 0.004003766 | 0.023710081 |
| QtXtXVAkSJEGOKW.E4 | FEM1A    | 55527  | 0.004005648 | 0.023715368 |
| chUqUTshJylLn.13yo | GOSR1    | 9527   | 0.004007753 | 0.023721964 |
| QBllkrhqlor6K7Jjok | ANKRD54  | 129138 | 0.004011297 | 0.023737076 |
| Te_uuOj.sn55_.RR60 | FEZ2     | 9637   | 0.004021431 | 0.023791167 |
| OUu3XrB6Bd14qoNeuc | ZFP36    | 7538   | 0.004023868 | 0.023799705 |
| f6UiKghEjjgnolKnlo | FXYD5    | 53827  | 0.004029073 | 0.023815145 |
| uVLfujoDsudiOT3nwl | HSP90AA1 | 3320   | 0.004029239 | 0.023815145 |
| rkoMfJez6grm4BOC_c | SAV1     | 60485  | 0.004029461 | 0.023815145 |
| fTRKFT7uuNLpU2Xlds | NA       | NA     | 0.004034389 | 0.023838392 |
| Zq6l7.CneEjFGATgkY | MED9     | 55090  | 0.004036217 | 0.023843309 |
| T6iVT5d7dfa5eSif7c | ALKBH2   | 121642 | 0.00403821  | 0.023849204 |
| Ijd71XLC5fU7aXcFUo | PLEC     | 5339   | 0.004040038 | 0.023854116 |
| WQag5.Qf9VPQTjvp7o | NSL1     | 25936  | 0.004043471 | 0.023868505 |
| rF5Sp03JTpDv5fg6q4 | KLHL12   | 59349  | 0.004044855 | 0.023870794 |
| E3aVTZVFknHVf31Af8 | CBFA2T3  | 863    | 0.004047403 | 0.023879944 |
| ul5Lw8k96S.4TSUnlc | RUNX1T1  | 862    | 0.004049839 | 0.023884189 |
| fTThku3VLpXvdXrqfQ | TECR     | 9524   | 0.004050116 | 0.023884189 |
| ERTupd1LkBRyK9RThY | C10orf99 | 387695 | 0.004052608 | 0.023893002 |
| NFK5O.lxCereDh_VS0 | POLG     | 5428   | 0.004056762 | 0.023911603 |
| KpDhvq_fXKXp4vuXCo | RASL11B  | 65997  | 0.004059032 | 0.0239191   |
| iHI3kOH7LS6CLNH9V4 | UBA5     | 79876  | 0.004060804 | 0.023923658 |
| 3Siu6oKKqP27v5OLuY | FAM134C  | 162427 | 0.004064736 | 0.023940933 |
| B73kp_SL33RT8B4KFc | HORMAD1  | 84072  | 0.004074981 | 0.023995374 |
| HUhSdeaBae6T666T6c | NA       | NA     | 0.004079245 | 0.024014579 |
| Oe3ne_3vf1eHV1RYKU | MICALL1  | 85377  | 0.004083619 | 0.024034427 |
| 6du_7ke4zDrLNLkH8M | PNRC2    | 55629  | 0.004087219 | 0.024049661 |

|                     |           |        |             |             |
|---------------------|-----------|--------|-------------|-------------|
| codf5SdghBET5CVegk  | HSPA14    | 51182  | 0.004088216 | 0.024049661 |
| HRPf.670yffdMSuUhE  | CCP110    | 9738   | 0.004090818 | 0.024055393 |
| W6nd2Eb50ILR19V7o8  | NSDHL     | 50814  | 0.004091981 | 0.024055393 |
| 0fe1V85QQjpfVd4BAs  | FAM206A   | 54942  | 0.004092203 | 0.024055393 |
| xF7uBdOUJEJmQemSuc  | BBS9      | 27241  | 0.004093864 | 0.024057584 |
| 68oOB94qUADuHhqBD0  | ARL6IP1   | 23204  | 0.004094584 | 0.024057584 |
| uFiFdP.ptPecs_6SgQ  | SLC30A5   | 64924  | 0.004098239 | 0.024068552 |
| csh_hjmJfWtLhu4pII  | PLEKHA1   | 59338  | 0.004098461 | 0.024068552 |
| oioTn1X7UX_SXv3tOw  | CCNI      | 10983  | 0.004100565 | 0.024069015 |
| ZXqR_.l.t53S7fV.hOo | DHRS11    | 79154  | 0.004100952 | 0.024069015 |
| iwYT56OcR1O3f7qFsk  | LOC400657 | 400657 | 0.004102226 | 0.024069015 |
| HuX4KkkpULnneHgB4s  | PANX1     | 24145  | 0.004102558 | 0.024069015 |
| ZJx.1LL_Uf3WKy.p50  | COQ10B    | 80219  | 0.004105493 | 0.02407574  |
| NF3.BKJeJEK.Dignqk  | TOPBP1    | 11073  | 0.004105715 | 0.02407574  |
| 3shEtNIA7eV.78ffrU  | ANKRA2    | 57763  | 0.004109093 | 0.024084406 |
| ZW5d9J27uul6TOP7is  | N6AMT1    | 29104  | 0.004109204 | 0.024084406 |
| B3iJygHqK_JSiSqB_o  | NFKBIB    | 4793   | 0.004110588 | 0.024086627 |
| NEm6EDd0IFXrxKLFiY  | PRKD2     | 25865  | 0.004113745 | 0.024099228 |
| NHnpJp.ez3IEUqkjv4  | USP32     | 84669  | 0.004123989 | 0.024153337 |
| KR4.hMt6exUoOiXka4  | NUP153    | 9972   | 0.00413069  | 0.024185944 |
| rR_heoplr9LiVi2YR4  | PLA2G2D   | 26279  | 0.004131576 | 0.024185944 |
| 9pSqr3kX018M7RL_4   | NFATC3    | 4775   | 0.004134843 | 0.024195436 |
| 39VxcRSh6guSxQShFU  | YIF1B     | 90522  | 0.004135286 | 0.024195436 |
| iV9ewhjuHkQIR5Lv.Q  | PPP2CA    | 5515   | 0.004136228 | 0.024195436 |
| 06Xqf3il83jl3kvTtU  | SEPN1     | 57190  | 0.004138055 | 0.024200216 |
| xl1LvChJ9Elq_UIHxE  | PEX1      | 5189   | 0.004141101 | 0.024212117 |
| ooJDrOploJp54jxygk  | NOP56     | 10528  | 0.004142208 | 0.024212683 |
| 6OjTeJdKK_KeS4nuHk  | EIF2AK4   | 440275 | 0.00414758  | 0.024238167 |
| 93cSRpe6XvQpIFGFfg  | P4HB      | 5034   | 0.004151512 | 0.024255227 |
| 6pblaASlunIgiYJtfw  | ZNHIT2    | 741    | 0.004154281 | 0.024265485 |
| iVUXXiJRw7CMSATJ4o  | COPS8     | 10920  | 0.004157936 | 0.024280913 |
| K3Rnjp_kiRfa8H5N1I  | REXO2     | 25996  | 0.004160372 | 0.024289221 |
| TNBCuu46deRKVhMo4o  | FAHD2B    | 151313 | 0.004162089 | 0.024293322 |
| 3Dsp5kfV7Ua1UpfXt8  | SCLY      | 51540  | 0.004164138 | 0.024296673 |
| 3tFgoAgUouyKOOKKtE  | CLK1      | 1195   | 0.004164692 | 0.024296673 |
| r7oXdqQd7q7qpXq4Oc  | OS9       | 10956  | 0.004167294 | 0.024305938 |
| NduRO4Lld4vwr_vDHo  | WDR26     | 80232  | 0.004169343 | 0.024311969 |
| K3xukdmvotJiiJil6M  | SLC39A4   | 55630  | 0.004171946 | 0.024321225 |
| 3gLIXo9O6nfU6fC75U  | DRAM2     | 128338 | 0.004173497 | 0.024324345 |
| fp1dOCsgUnnvHfivE0  | PTCD1     | 26024  | 0.004182855 | 0.02437296  |
| 3fiSuiU653uumTj0ei  |           | 220972 | 0.004185347 | 0.02438155  |
| cV8oEsL_Xwd3k6.ACUC | DENND4C   | 55667  | 0.004187175 | 0.024386265 |
| EhCL3qxD.qNy9V6AJ4  | IFRD1     | 3475   | 0.004189334 | 0.024392912 |



|                    |          |        |             |             |
|--------------------|----------|--------|-------------|-------------|
| xUXi0OVCOVXIEUmgI0 | MRPS18B  | 28973  | 0.004193875 | 0.024408131 |
| 6uLs47KwAzMX2rZL0U | TLR1     | 7096   | 0.004193986 | 0.024408131 |
| fclcj.osAVfSR_FgMU | HNRNPH3  | 3189   | 0.00419753  | 0.024422824 |
| HuyJCRv9RdHt1NdRd4 | SLC5A6   | 8884   | 0.004203345 | 0.024450716 |
| xTUCXglK6u6kqnk.zg | PLEKHJ1  | 55111  | 0.004210156 | 0.024484392 |
| Eor4koo_fiVKL_LUI4 | NA       | NA     | 0.00421287  | 0.024494226 |
| Nehl.uZ4lIdSr5eoEs | WDR46    | 9277   | 0.004215805 | 0.024505343 |
| QrfotBVJV0CRXIOiE  | RASAL3   | 64926  | 0.00421802  | 0.02451227  |
| NKNXgi36IAr3uV0rqk | DGKD     | 8527   | 0.004220124 | 0.024514059 |
| 6uN9Nx5mtCpRap9S98 | TMEM134  | 80194  | 0.00422101  | 0.024514059 |
| BFu9JwV6oQJt6di6A  | GMPR     | 2766   | 0.004221398 | 0.024514059 |
| Hi55AJVM3pQvQrgmO4 | PI4KAP1  | 728233 | 0.004224554 | 0.024526444 |
| NUJXohU8UW8FdDEnec | GNL3L    | 54552  | 0.004232418 | 0.024566143 |
| Bt5C9BrTJ7V1KVQX5c | NRM      | 11270  | 0.004239728 | 0.0245989   |
| ip1TXERl_z_fHu6lJ4 | CCNYL1   | 151195 | 0.004240115 | 0.0245989   |
| fUMXUW6J_OJ6JSIWE  | POP7     | 10248  | 0.00424748  | 0.024625985 |
| rNM1ieFr6KuEjSCnes | DCAF6    | 55827  | 0.004247868 | 0.024625985 |
| fXL4oy0om0O5_xMi54 | ATF4     | 468    | 0.004247868 | 0.024625985 |
| ZmerQkhARYggpS7rBc | DYNC1H1  | 1778   | 0.004249529 | 0.024629656 |
| 6irtiDI1xuGgJl1uvU | SDHAP2   | 727956 | 0.004252686 | 0.02463667  |
| WUqKupd_vUp34DLkI8 | INPP5D   | 3635   | 0.004252797 | 0.02463667  |
| rVofv3RS4JRI86SEnU | RCN2     | 5955   | 0.004255953 | 0.024648995 |
| ie0v5HrazOgET53Fec | PIGA     | 5277   | 0.004264315 | 0.024691454 |
| ZoUjjV9Q7rnJKSjV90 | SETDB1   | 9869   | 0.004267748 | 0.024705363 |
| KwBAkFV.VcUcaAlkJ0 | TAF1     | 6872   | 0.004271016 | 0.024718303 |
| B3iXW2Vde_rCrvI7h8 | ATP6V0E2 | 155066 | 0.004273341 | 0.02472579  |
| 3Ztd.fqgvii5X0iUsk | SHMT2    | 6472   | 0.004283586 | 0.024779081 |
| fCWXUrJJRJSiREhIc  | CEP250   | 11190  | 0.004285746 | 0.024785589 |
| o1fQbLTVeugkiYaVc  | SPG7     | 6687   | 0.00429372  | 0.02482037  |
| NqAI5QBO1XRUpwH4x4 | CRBN     | 51185  | 0.004294662 | 0.02482037  |
| BTkXEdSXq4SpSHe4AA | ANKRD30B | 374860 | 0.004297652 | 0.02482037  |
| H3iFCp_fheOP9fSd3g | MSANTD4  | 84437  | 0.004299036 | 0.02482037  |
| 31KT7HCzqgUSIIT1dl | FAM35A   | 54537  | 0.004299646 | 0.02482037  |
| 9VqslPr36N7vIOLn9U | POLR3A   | 11128  | 0.00430031  | 0.02482037  |
| xkcLXk9e8CUfq0wgql | SON      | 6651   | 0.00430031  | 0.02482037  |
| Eord7enyhJ6cLeNvVc | SCARNA3  | 677679 | 0.004301085 | 0.02482037  |
| ZoksX1aLUZO4vq0Lk8 | SURF6    | 6838   | 0.004301085 | 0.02482037  |
| 9xJc3ThTPgOxoP41OY | LIG4     | 3981   | 0.004303688 | 0.024829408 |
| r4o5DI3jal4Bfr_U4I | ARID4A   | 5926   | 0.004305737 | 0.024835247 |
| f7pGI0Oh366n2IJIxs | NTHL1    | 4913   | 0.004311496 | 0.024862243 |
| 6fo6FRgZ3yf3SqtJIs | HMGCR    | 3156   | 0.004312493 | 0.024862243 |
| idTUjrosWZITwC07AI | MIR22HG  | 84981  | 0.004319083 | 0.024888573 |
| 0IKXO_iovAxe5NUkmg | DUSP22   | 56940  | 0.004319138 | 0.024888573 |

|                    |          |        |             |             |
|--------------------|----------|--------|-------------|-------------|
| Bp7R2pwkj7ug617qrM | PGK1     | 5230   | 0.004322793 | 0.024903644 |
| HeDVJ11Xy4VQt79XSc | PPIF     | 10105  | 0.004329272 | 0.024934973 |
| rd_cJfddHlfynVKllo | TEX264   | 51368  | 0.004330712 | 0.02493727  |
| i0AqShSRXfcaKCgakQ | PPIEL    | 728448 | 0.004334035 | 0.024950405 |
| xgEjQSVAj.XtXouUIU | FBXL16   | 146330 | 0.004340182 | 0.024974743 |
| ir_AidNIC9_NR_T1Ko | RNF219   | 79596  | 0.004340348 | 0.024974743 |
| Ni6Cd9NxBWWFog9eqY | ATP1B3   | 483    | 0.004344003 | 0.024989771 |
| 0H6ylikog2fAVuK6K8 | HSCB     | 150274 | 0.004347325 | 0.025002881 |
| EI7VdR60PSTOgswOS0 | AMPD3    | 272    | 0.004350094 | 0.0250128   |
| Zpfeh_8PIdJSR.KE3o | ZKSCAN4  | 387032 | 0.004354469 | 0.025031946 |
| HfEV6SCoiA7v_q6sHA | KBTBD6   | 89890  | 0.004361003 | 0.025063495 |
| ijr3_u2e1cG0THr6uE | WDR12    | 55759  | 0.004362665 | 0.025067029 |
| 0rtHC3qPUP16xYjeRg | NDUFAF7  | 55471  | 0.004370916 | 0.025108416 |
| ieUy8Xo_0l_sl.twLU | CHM      | 1121   | 0.004372799 | 0.025113209 |
| oz1NONDilEVxBzUuVs | NA       | NA     | 0.004374571 | 0.025117365 |
| ZjiUrEwZpE.3krSSwo | DIS3     | 22894  | 0.004377506 | 0.025128193 |
| 3Hcr9x_P.VU7MX9N70 | RABGGTB  | 5876   | 0.004379942 | 0.025130153 |
| 9W7mqeJWnjAkf3d4AA | MMP23B   | 8510   | 0.004380441 | 0.025130153 |
| fneiiAj610jhX9055I | CCL23    | 6368   | 0.004380995 | 0.025130153 |
| N5ieS0I9G3pdLVbtLk | OSBPL5   | 114879 | 0.004384539 | 0.025139094 |
| uu42IIPSAIfx_70IzE | SLC39A8  | 64116  | 0.004384705 | 0.025139094 |
| iJeTpQVCOUg683ERX0 | OMA1     | 115209 | 0.004385702 | 0.025139094 |
| rwEDr_69En9NQn64w0 | TMED7    | 51014  | 0.00438919  | 0.025153073 |
| Bh2i2Vf3cUBeoICULU | KIF9     | 64147  | 0.004393787 | 0.025173391 |
| lcsfL5RHTnxMgliVCA | CEP57    | 9702   | 0.00439495  | 0.025174032 |
| HLP.VUpSNPbi7mLu7k | GSPT1    | 2935   | 0.004397774 | 0.025184187 |
| 3YsRIVQrrp0q4KWoLg | B9D1     | 27077  | 0.004400875 | 0.025195923 |
| EfuufPTeJbdRLVDI3k | CCDC117  | 150275 | 0.00441699  | 0.02528214  |
| 95SDsvINI.j7gQoeHk | TMEM167A | 153339 | 0.004420202 | 0.025294481 |
| Tqlzlo.46GFuzL_Vek | RFESD    | 317671 | 0.004424742 | 0.025314419 |
| ZOidegkki1.hUoLn0o | SMARCAL1 | 50485  | 0.004426736 | 0.025318166 |
| uEm25e4K6tAq4ip9fc | NA       | NA     | 0.004427511 | 0.025318166 |
| upLKdwurh6USliAKsQ | PLA2G15  | 23659  | 0.004430502 | 0.025328556 |
| H.g9_ulpdJN1_p63qU | PRR14L   | 253143 | 0.004431443 | 0.025328556 |
| WiSNevh5lhF_CzqvZE | GAD1     | 2571   | 0.0044346   | 0.02533862  |
| TQrWdVrSajXvQw4DoY | GGT1     | 2678   | 0.00443532  | 0.02533862  |
| WSCXI8FLZyOV97UqH4 | RIPK2    | 8767   | 0.004440137 | 0.025360096 |
| EfHceP1VSHuP.gfX5c | SLFN11   | 91607  | 0.004442851 | 0.025369545 |
| 326SBok0IIV77qb7TQ | MAST3    | 23031  | 0.004445564 | 0.02537899  |
| fVK2udpUh85W7.RJUQ | RMI1     | 80010  | 0.004448001 | 0.02538685  |
| K65bk0UDgL_z8GKK58 | FYTTD1   | 84248  | 0.004457027 | 0.025432308 |
| BJIHip6jPXTrpJnTJg | STMN3    | 50861  | 0.004465611 | 0.025475218 |
| f3Lo_v9BNuXljOXEg0 | ADSS     | 159    | 0.004467881 | 0.025482102 |

|                     |          |        |             |             |
|---------------------|----------|--------|-------------|-------------|
| xXpBS6gCATmKeygiol  | PCYOX1L  | 78991  | 0.004475246 | 0.025518033 |
| QFL.xJderq234VAd_4  | TMEM167B | 56900  | 0.004479178 | 0.025534374 |
| oVrnyK8H66XKlqJSg   | CELF2    | 10659  | 0.004488094 | 0.025579112 |
| ZE9ZUN7Fo56Sorplic  | EIF6     | 3692   | 0.004492247 | 0.025596693 |
| Wx.KUeRMrLXtOLjp6l  | GPR155   | 151556 | 0.004494518 | 0.025599344 |
| ciuyoP_Xl9eSF4np.o  | FLNB     | 2317   | 0.00449485  | 0.025599344 |
| xnosot6i6lVSgEk4jk  | SLC4A9   | 83697  | 0.004498505 | 0.025599411 |
| l6nnXidLtCuPQey5SE  | C17orf58 | 284018 | 0.004498671 | 0.025599411 |
| 9Ks_CeSKjQfuflloZQ  | CLYBL    | 171425 | 0.004499446 | 0.025599411 |
| ZujesuJTfoV4lopBEU  | FBXO22   | 26263  | 0.004499557 | 0.025599411 |
| updmep6g9RelELVka   | GRB10    | 2887   | 0.004500277 | 0.025599411 |
| HzpV5fVKLEVQSRXdSM  | FCER2    | 2208   | 0.004501274 | 0.025599411 |
| xd10QdUa61S9QkSJ9c  | LPA      | 4018   | 0.004505205 | 0.025608256 |
| NSl9XhUlKBAQqFC5EQ  | ARHGDIa  | 396    | 0.004505759 | 0.025608256 |
| rupwjK1x5AUvDTP1sU  | IFI44L   | 10964  | 0.004506036 | 0.025608256 |
| IKUJ nTlzLVJH_opQ   | ZNF14    | 7561   | 0.00450731  | 0.025609419 |
| 9HL.3lJzvg5ED3tGTs  | NAP1L1   | 4673   | 0.004511186 | 0.025625365 |
| KlJHI.lJNcDei.xQgo  | TFDP2    | 7029   | 0.00452204  | 0.02568093  |
| 0ZXlyAIT.DBfp5bd6c  | NANOG    | 79923  | 0.004525806 | 0.025692732 |
| cnBChQLongJFMXjnjQ  | CEP290   | 80184  | 0.004527689 | 0.025692732 |
| BUXj1aEhdVB1m4hlg8  | CCDC106  | 29903  | 0.004527744 | 0.025692732 |
| WkOfCXkjGw7hr7.u_E  | UBLCP1   | 134510 | 0.004528408 | 0.025692732 |
| iIM_jhP14TuoqIB1cE  | FOXP1    | 27086  | 0.004531842 | 0.025704434 |
| lToEVSQkXVJeX9okkU  | DAP      | 1611   | 0.004532617 | 0.025704434 |
| HqE5HoMoDtVtDX15Fc  | TBC1D10B | 26000  | 0.004541201 | 0.025747015 |
| QvEIM5KEksdJOt85Eo  | TSPY2    | 64591  | 0.004543748 | 0.025755362 |
| 6gXEdSlA0QOGISBJck  | LETM2    | 137994 | 0.004549009 | 0.025779082 |
| rLiRQKomPQl7mgV4pY  | CUEDC2   | 79004  | 0.004551058 | 0.025779437 |
| T05W.n6v4UdVHXo3oc  | TRMT2B   | 79979  | 0.004551224 | 0.025779437 |
| K0dTUXaIUUV1VJSMaDA | MOB3A    | 126308 | 0.004556872 | 0.025805329 |
| HDuygCX3pRUiJaJXn4  | PARP16   | 54956  | 0.004575479 | 0.025904574 |
| xYVriUeTFaA95.jmN0  | GALNTL6  | 442117 | 0.004578303 | 0.025914439 |
| Eurjl.9.wlSxmzzl5c  | MST4     | 51765  | 0.004582623 | 0.02593276  |
| Ns7BSD68u4VXQskLjo  | TXNDC15  | 79770  | 0.004586056 | 0.02594606  |
| ov6uPICjPn11SSQ1OY  | ESR2     | 2100   | 0.004592092 | 0.025965885 |
| Q7LRJx2opYrqKt94lQ  | ERGIC1   | 57222  | 0.004592591 | 0.025965885 |
| BqUICQfix6nDeniy0s  | ELF1     | 1997   | 0.004592812 | 0.025965885 |
| 9lelUlcd7sMgwKXm7s  | LAT      | 27040  | 0.004595692 | 0.025976034 |
| Kr11jfEp01K9QLn3t0  | SLC24A4  | 123041 | 0.004596855 | 0.025976478 |
| EWe_.zqC27TXKr6p6k  | PDE4A    | 5141   | 0.004600011 | 0.025988184 |
| 0_QLpGXoiB_gnUZV9w  | C22orf32 | 91689  | 0.004603278 | 0.025997821 |
| 6f.eU4P5PSh0qLER8U  | AMMECR1  | 9949   | 0.004603887 | 0.025997821 |
| ZZlrR7pAlOQJVd1y9M  | DPEP3    | 64180  | 0.004605549 | 0.02600101  |

|                    |           |        |             |             |
|--------------------|-----------|--------|-------------|-------------|
| 6jnjVddN1dCjpxsVUA | CORO1A    | 11151  | 0.004606656 | 0.02600101  |
| 3VtUR5VU.ixFkQtAZw | ZHX2      | 22882  | 0.004607708 | 0.02600101  |
| HVJXHWNdMxVa6NUQdM | ELP5      | 23587  | 0.004609093 | 0.026002697 |
| 0C3Sunm7rp05ew1QT0 | YRDC      | 79693  | 0.004621276 | 0.026065289 |
| K50Suh4gNLxN8LhcSo | MTMR6     | 9107   | 0.004628918 | 0.026102247 |
| 9RLehWRte9AJldqB5c | RANBP3    | 8498   | 0.004633348 | 0.026120744 |
| N1ycfqKeK6iD50JUos | USP49     | 25862  | 0.004634677 | 0.026120744 |
| 6HlloovlD6S7t83U74 | COG6      | 57511  | 0.004636006 | 0.026120744 |
| EW1L4Sv4t15_zK4fuU | RNASEH1   | 246243 | 0.00463656  | 0.026120744 |
| 9bqdQuXuhMYjUvd0oY | IDUA      | 3425   | 0.004640547 | 0.026137059 |
| ckvq9KgOo_H6X0p1.o | ACTR2     | 10097  | 0.004642319 | 0.026140894 |
| u.pJNJFFdzulLqNFtg | CPA5      | 93979  | 0.004649186 | 0.026164088 |
| 0edV_TAo3czXINUr8o | CARD16    | 114769 | 0.004649574 | 0.026164088 |
| ueEXSoQljehINloSuk | RPS19     | 6223   | 0.00465057  | 0.026164088 |
| fCv7hsnuXsXqkiKOUo | PNPLA5    | 150379 | 0.00465118  | 0.026164088 |
| c7j5JJXoc.P3o7VMTg | ZNF333    | 84449  | 0.004651899 | 0.026164088 |
| T7t5r05qK6Jh44VeAl | FAAH      | 2166   | 0.004656717 | 0.026185037 |
| HR3OoB30kXF5IVREXc | LPCAT4    | 254531 | 0.004660206 | 0.02619096  |
| 9nXuF7Sp4fRd503S.U | QPRT      | 23475  | 0.00466148  | 0.02619096  |
| xi1KL_IUI6kECYhXt8 | OCIAD1    | 54940  | 0.004662089 | 0.02619096  |
| WrE1KLfT597zxVt13k | FN3KRP    | 79672  | 0.004662144 | 0.02619096  |
| Wr3h4VFcSh54EiJUu4 | POLR1C    | 9533   | 0.004667737 | 0.026216233 |
| rp6llqLZ6ubqnl2Wbc | NA        | NA     | 0.004675269 | 0.026252377 |
| rlN574g_srHn3iBenk | TMED10    | 10972  | 0.004677761 | 0.026253504 |
| 9V4IF_Shv9VBd8RXo4 | B3GAT1    | 27087  | 0.00467837  | 0.026253504 |
| BADyUpuum7l7DVJB0o | LINC00114 | 400866 | 0.004678757 | 0.026253504 |
| WAd7tVolR0W3Tf11AU | NA        | NA     | 0.004681194 | 0.026257982 |
| NnnVXrro16D.dGsiU8 | OSM       | 5008   | 0.004681748 | 0.026257982 |
| oFZWlqilROY96Celk8 | OGFOD3    | 79701  | 0.004687618 | 0.026282635 |
| B6aUme6u4Y44QlwHmQ | BCRP2     | 400892 | 0.004688338 | 0.026282635 |
| TN5ZavnuYc91qJbW7Q | LBR       | 3930   | 0.004695537 | 0.026316833 |
| Z3l6V55V14N2zjrRLU | MKNK2     | 2872   | 0.004698416 | 0.026326813 |
| iZ4bj687RATAU1_cSU | CLTA      | 1211   | 0.004702791 | 0.026345164 |
| Z5K0omXVEuL9VRHadc | RRP7B     | 91695  | 0.004707    | 0.026358314 |
| unE7UoEHklKKSBJcrc | FAM212B   | 55924  | 0.004708163 | 0.026358314 |
| BUxJ_hlTrr3j5eojJU | NA        | NA     | 0.004708439 | 0.026358314 |
| llthm2VCYFebYoql.s | ZNF837    | 116412 | 0.004718075 | 0.026405183 |
| i1UBX7T9VS4neP3lec | TERF2IP   | 54386  | 0.004719017 | 0.026405183 |
| oJaIQgl45QsnUqBk7o | NDUFS3    | 4722   | 0.004724665 | 0.026424444 |
| H5sXMB_ydeHfKjo.4o | ANKRD32   | 84250  | 0.004724665 | 0.026424444 |
| Q8SSUhjTknHEOf36AY | HIF1A     | 3091   | 0.00473059  | 0.026450188 |
| oklwDVPwryq_tfOUkl | ZBTB41    | 360023 | 0.004731476 | 0.026450188 |
| N_gvYKp7bu7pXjfZ_0 | JTB       | 10899  | 0.00473275  | 0.026451135 |

|                     |          |        |             |             |
|---------------------|----------|--------|-------------|-------------|
| ilKaOEjqFdd6UDsXds  | CR1      | 1378   | 0.004736903 | 0.026468172 |
| x99e0A3dcUI671HtSU  | ARL2BP   | 23568  | 0.004741112 | 0.026485511 |
| xe78OPPt4I7Hef1MU   | NUP54    | 53371  | 0.004742441 | 0.026486758 |
| 9sVEiHiL6566_66SOM  | DCTN5    | 84516  | 0.004746207 | 0.026501611 |
| 0qH0HISQToo67Xil1A  | PTOV1    | 53635  | 0.004749308 | 0.026511523 |
| NIBXiQqB10ADTKmgX4  | TMEM117  | 84216  | 0.004751246 | 0.026511523 |
| Nov4vgk4A65U5eGdSY  | YTHDF1   | 54915  | 0.004751357 | 0.026511523 |
| okS8kB.s7T9fQpNOSI  | TIA1     | 7072   | 0.004752409 | 0.026511523 |
| Tm3VF4ZpSuVL530KX8  | MPG      | 4350   | 0.004753793 | 0.026512458 |
| 3le.7yRFyH57B7HTtU  | FBXO11   | 80204  | 0.00475479  | 0.026512458 |
| KObuklQp.vsokOHvrM  | HIGD1A   | 25994  | 0.004756894 | 0.026518019 |
| 3f9QwllkbtInomXk_4  | FAM50A   | 9130   | 0.004760162 | 0.026521113 |
| EgQ625QAqWaUTklz2c  | NA       | NA     | 0.004760715 | 0.026521113 |
| i3urBCqi6u9.Ol_cB0  | FAM86DP  | 692099 | 0.004760771 | 0.026521113 |
| HnjqJFdVlrQQ1Pbwdl  | C11orf71 | 54494  | 0.00477096  | 0.026571696 |
| EoR_koqAKCKECirr6U  | RAD54L2  | 23132  | 0.004775224 | 0.026589262 |
| Q_7Ylfq6pSiiuOm0ig  | LIMS2    | 55679  | 0.004779267 | 0.026603104 |
| TxBZupPeZZNeZF_Zh8  | ANKRD9   | 122416 | 0.004779931 | 0.026603104 |
| IOFICqUWq3DrhLUBRO  | PXN      | 5829   | 0.00478198  | 0.026608325 |
| 3BoklUCeJClAhKv9QU  | MTMR14   | 64419  | 0.004783199 | 0.026608923 |
| TuUVS4jtV4V1FkgoKQ  | CCKAR    | 886    | 0.004792613 | 0.026655104 |
| idf6hg16cB1U_Jdv_k  | DHX9     | 1660   | 0.004796212 | 0.026668931 |
| NqizUSLQKBHINVf0m4  | HMBOX1   | 79618  | 0.004801639 | 0.026687641 |
| od1UtXAK77i63RJUco  | ZNF671   | 79891  | 0.004801805 | 0.026687641 |
| lVaKci7cAghvSYQQgl  | CDC5L    | 988    | 0.004804463 | 0.026690915 |
| W1AooO5XojTQkqJ3mU  | HSD11B1  | 3290   | 0.004805239 | 0.026690915 |
| xqNS99STVlt0tAUdQ0  | RAPH1    | 65059  | 0.004805737 | 0.026690915 |
| lSKkkKBBeBVzVaJ6DE8 | PNKD     | 25953  | 0.004808395 | 0.026699488 |
| c1JKFScdUS5UIKooool | NEIL1    | 79661  | 0.004812382 | 0.026715434 |
| TEBELFdIUeUn0ul7Y   | MNF1     | 84300  | 0.004818363 | 0.026742438 |
| BF16jZN6luXLPeUn2g  | RPL32    | 6161   | 0.004830435 | 0.02680323  |
| iSnSegioAuCgYIV.ek  | ISY1     | 57461  | 0.00483625  | 0.026829279 |
| NS85_j.qtTSR7tXXoI  | DOLK     | 22845  | 0.00484356  | 0.026863609 |
| ZlOkQiAUIKABSEh.RE  | QRICH1   | 54870  | 0.004846661 | 0.026867368 |
| BnorpYPhAVN_Cnpamw  | RPL8     | 6132   | 0.004846827 | 0.026867368 |
| 6.3Ve55ZZW6WVd14Hw  | B3GAT1   | 27087  | 0.004847602 | 0.026867368 |
| TeKQEpOoA6Cr4o6Fog  | ZBTB4    | 57659  | 0.004850703 | 0.026877949 |
| cl0M7qTWnXrlqfRTQg  | TTLL3    | 26140  | 0.004851755 | 0.026877949 |
| HWMBKUECd2VewfMVRU  | RNPS1    | 10921  | 0.004854967 | 0.026889524 |
| KucVf485IQXTSeXB80  | RASA1    | 5921   | 0.004860339 | 0.026906878 |
| Zy1Jx_Kel6ijiorap4  | LONP2    | 83752  | 0.004861557 | 0.026906878 |
| xe0Ukf_FC15x5pV5XI  | MAP3K11  | 4296   | 0.004861889 | 0.026906878 |
| Klp4DBeD0JSgkkn7c   | NAT1     | 9      | 0.004862831 | 0.026906878 |

|                      |           |        |             |             |
|----------------------|-----------|--------|-------------|-------------|
| KevBfguHvsU6_5E59I   | RDX       | 5962   | 0.004863717 | 0.026906878 |
| OtEvV.P0TCVAeMhLBo   | SEMA3C    | 10512  | 0.004865157 | 0.026908629 |
| o7nKyuBSAUUV2UUI dnU | TMEM143   | 55260  | 0.004871913 | 0.026936313 |
| 3UVUXVEK2iVGIY0EAw   | TCERG1    | 10915  | 0.004872411 | 0.026936313 |
| l.3_I_Srf3eR1JcpBlk  | ICA1L     | 130026 | 0.004874349 | 0.026940811 |
| opLlq5393logH5SiEI   | ZUFSP     | 221302 | 0.004877617 | 0.02695265  |
| OucnC.7k.okveX.T3o   | RNF170    | 81790  | 0.004882822 | 0.026974884 |
| Oh_Ixqey.nhV03AAyk   | ACPL2     | 92370  | 0.004884096 | 0.026974884 |
| 9AochlCXo5QolXrtE4   | MDK       | 4192   | 0.004886089 | 0.026974884 |
| WHjTglFpR5Rk75F7IM   | EPN2      | 22905  | 0.004886145 | 0.026974884 |
| o3olSGxJ_ipKqHcKQo   | TP53I11   | 9537   | 0.004895448 | 0.027015627 |
| xtCkCdLbVJF0IN7II    | DTNBP1    | 84062  | 0.00489578  | 0.027015627 |
| urtdTVUuX0TfijOfew   | PECR      | 55825  | 0.004900875 | 0.027037512 |
| 0Vd7ItOYHEv6B_ofJU   | ELMOD2    | 255520 | 0.004903422 | 0.027045336 |
| KzPzCAqMCsMiV95VUU   | C9orf72   | 203228 | 0.004907354 | 0.027055785 |
| oE6KFQSiluneOeJgnM   | CDK10     | 8558   | 0.004907576 | 0.027055785 |
| rV5VQHpwH.J.S9eHVQc  | MRPL49    | 740    | 0.004908905 | 0.027056885 |
| l7S.UQggpripLor4og   | SIGLEC17P | 284367 | 0.004921143 | 0.027114304 |
| QQuS6TufsNUnHeinik   | DMC1      | 11144  | 0.004921586 | 0.027114304 |
| Q3IU1VYe70otUX5P0g   | STK10     | 6793   | 0.004930169 | 0.027155347 |
| Zcpza5595Uf0ogV53k   | EPHA1     | 2041   | 0.004933215 | 0.027160563 |
| WAipC14FwUOF46PnYU   | PSME4     | 23198  | 0.00493471  | 0.027160563 |
| BQnr164EzeFAqOO610   | SIRPG     | 55423  | 0.004935264 | 0.027160563 |
| KUfiW8LnID7EM5Up_Q   | LAMTOR3   | 8649   | 0.004935652 | 0.027160563 |
| oySfqRdR3ua3jpVJCs   | NAIF1     | 203245 | 0.004937092 | 0.027162246 |
| l41UF5GqT1593dKUUQ   | TGM3      | 7053   | 0.00493831  | 0.02716271  |
| rKxSRLo6oOu4Xe1ed0   | NA        | NA     | 0.004944291 | 0.027189363 |
| K5IVzOXm3DuX10h57o   | NA        | NA     | 0.004955255 | 0.027238371 |
| 9SSRHeoUUnP9Xd.eA0   | CALML4    | 91860  | 0.004955477 | 0.027238371 |
| o5yE66E.iSXhe6oqrc   | MCM3AP    | 8888   | 0.004960239 | 0.027258294 |
| Bfd.fRDs7XS6xc8_OU   | ZNF330    | 27309  | 0.004970318 | 0.027305412 |
| 3gnikog67gVLiWI25Q   | SNAPC1    | 6617   | 0.004971093 | 0.027305412 |
| OLXqh1uXoFeXTe9eUg   | SETD1A    | 9739   | 0.004972422 | 0.027306451 |
| rYzjlg09aTxcF33kvo   | CCDC91    | 55297  | 0.004979344 | 0.027338197 |
| iSeuXwg_ISXSNe38k    | CHD1L     | 9557   | 0.004981338 | 0.027342875 |
| f_p.kpTml3tE3HQd54   | ATG4A     | 115201 | 0.004984661 | 0.027354845 |
| uuJ4hlwiDF_tOXNeV0   | CASP7     | 840    | 0.00498826  | 0.027368328 |
| Bp_tySwRS7eol5e_Ql   | C8orf33   | 65265  | 0.00499125  | 0.027374764 |
| Zk5Qkk50uq.yntE5J4   | PPP1R2    | 5504   | 0.004993133 | 0.027374764 |
| caxUq_fQs.vThG0HY4   | RCHY1     | 25898  | 0.00499341  | 0.027374764 |
| uqUR_J4tFIVz59BLn4   | GGA3      | 23163  | 0.004994075 | 0.027374764 |
| H3iJX1Xu15RTurSOx0   | NHP2L1    | 4809   | 0.004995736 | 0.027374764 |
| TuXZF9BpOgq9EfqlB0   | ZNF700    | 90592  | 0.00499629  | 0.027374764 |

|                    |          |        |             |             |
|--------------------|----------|--------|-------------|-------------|
| 919WLjFTgeUsinnNvU | PSME3    | 10197  | 0.005000332 | 0.027390648 |
| fe56o_mWK6biPUfuyA | TNPO2    | 30000  | 0.005017388 | 0.027473636 |
| WpXgg.kiq8uPouJd8  | VPS13C   | 54832  | 0.005017776 | 0.027473636 |
| x_3fmudOO7qkRoKT54 | RAB11A   | 8766   | 0.005020434 | 0.027478054 |
| Hi5ceKX8JFnBPX9TT0 | RBM47    | 54502  | 0.005020877 | 0.027478054 |
| li1DoDSRPWDUviuBeE | MAN2A1   | 4124   | 0.005025252 | 0.027495714 |
| 67bd1RVdVAIHokJExw | HOXB6    | 3216   | 0.005031897 | 0.027525786 |
| oLC3eVyKTSNF6oUdSI | CYP4F3   | 4051   | 0.005040204 | 0.027561969 |
| OKMjgigiTFKVRXp3V4 | KIRREL2  | 84063  | 0.005040813 | 0.027561969 |
| iF56_Zlxcp_1P85P0k | SRSF7    | 6432   | 0.005049064 | 0.027597876 |
| 3oV5wB3qBlXu12DoI4 | WDR20    | 91833  | 0.005049895 | 0.027597876 |
| WneUfnJ7iHuhAUdJd4 | GPR114   | 221188 | 0.005050836 | 0.027597876 |
| 03klj3koHq7kRrvsII | EFR3A    | 23167  | 0.005054768 | 0.027608579 |
| upeWHh7uk6JOnvVQuQ | SNAPC4   | 6621   | 0.0050551   | 0.027608579 |
| 68hekn_rifl.9F9LvE | SUGT1    | 10910  | 0.005057205 | 0.027613776 |
| iii7ibltNh.un9ShN0 | TNFRSF6B | 8771   | 0.005063296 | 0.027640737 |
| cVxMVK0j4ahSCoE2H0 | LEPR     | 3953   | 0.005065843 | 0.027648342 |
| 9SC_fOO7i4EzIHl6U  | TCF12    | 6938   | 0.005069    | 0.027659268 |
| xud4v2r3nXECBua55o | D2HGDH   | 728294 | 0.005070993 | 0.027663844 |
| HVRNhyS8dP591c7VeE | MSL3     | 10943  | 0.005072433 | 0.027665398 |
| o1JThVRV3lAsd8rlLc | IL10RA   | 3587   | 0.005076033 | 0.027678728 |
| 06iniuro0ei.iFFeIA | SLC35E1  | 79939  | 0.005083509 | 0.02770869  |
| 9ltuzu_5210.Tr_6n0 | OR4K15   | 81127  | 0.005083841 | 0.02770869  |
| 0miRCkLi.ke0lUhbCc | WASF3    | 10810  | 0.005089434 | 0.027732864 |
| QS47Yd.IRZTdSe_UIQ | C9orf72  | 203228 | 0.005090597 | 0.027732892 |
| 3FrTITWg7cwgogJ2Lg | NA       | NA     | 0.005094252 | 0.027746493 |
| Kt4W_zr_F4zHU91XmU | SLC29A1  | 2030   | 0.005112969 | 0.02784211  |
| WskfMjd1OxXkqp_se4 | PIGF     | 5281   | 0.005117344 | 0.027859599 |
| H4jXkHkd6epCJiHU3c | ZNF320   | 162967 | 0.005123325 | 0.027885821 |
| TlwluhWXRZ5IQJ5TWA | PHACTR1  | 221692 | 0.005128143 | 0.027901755 |
| E7rpO5ew1Scd6CeKyo | DUXAP3   | 503632 | 0.005128586 | 0.027901755 |
| 6GKFAI9BEgGwDo6ZF4 | SMARCA5  | 8467   | 0.005130247 | 0.027901755 |
| 91Tk_A876eJOunRF7A | MBOAT2   | 129642 | 0.005130912 | 0.027901755 |
| ons_dTdVSfdPOxdKs4 | ALG13    | 79868  | 0.005138443 | 0.027932136 |
| orrHujizeQhSePv9Ok | RTCA     | 8634   | 0.00513883  | 0.027932136 |
| ZeEuC6evE1pCauH1NI | CPVL     | 54504  | 0.005145642 | 0.027962815 |
| KdjLxUC9LcjpEBRd0o | SETD6    | 79918  | 0.005151069 | 0.027985957 |
| 33dt4IVKX.Uf4qK59g | CES2     | 8824   | 0.00515572  | 0.028004878 |
| igooh6hKIBZcAuzSrc | PSMD6    | 9861   | 0.005157991 | 0.028010859 |
| clJOt7v1_6PRe6V57o | ZNF407   | 55628  | 0.00515932  | 0.028011726 |
| WgChTgkvkP.XoXS3N0 | DTWD1    | 56986  | 0.005161092 | 0.028014998 |
| TpJXpA4NAhU9e9d1UU | VNN1     | 8876   | 0.005163473 | 0.028021574 |
| HSI5TeAOoD4helXnAk | KIAA2018 | 205717 | 0.005175878 | 0.028082529 |

|                    |           |           |             |             |
|--------------------|-----------|-----------|-------------|-------------|
| ul690Lv1yEiKRerSzw | CYTH1     | 9267      | 0.005178148 | 0.028088486 |
| oJ1.tndOntl161dRHo | AGPAT3    | 56894     | 0.00518795  | 0.028135283 |
| KueF3d1RIVSEVPtTJc | LRCH4     | 4034      | 0.005192602 | 0.028154136 |
| opD.CjABwT6UpGunRk | PHAX      | 51808     | 0.005193875 | 0.028154669 |
| HqeMMREvHh8lwEF65M | TPK1      | 27010     | 0.005197807 | 0.028169608 |
| KLZ4q1y_epnEXkaeFQ | NA        | NA        | 0.005200908 | 0.028175694 |
| f0gBQZQjV1SbUTbXek | AHDC1     | 27245     | 0.005201407 | 0.028175694 |
| WR1JcphIkIVT3fEC3c | PPP2R3A   | 5523      | 0.005202459 | 0.028175694 |
| KgPSFRJQIdeK pd3o  | DDX56     | 54606     | 0.005209049 | 0.028205007 |
| Ee956oV29Z3ezsJ5uQ | GATSL3    | 652968    | 0.005216082 | 0.028236705 |
| rqf45STX6NLHgdL1NY | MAP3K7    | 6885      | 0.005218297 | 0.028242313 |
| 9N7_Dpqj_M_d_DuJjM | AMY1B     | 277       | 0.005219903 | 0.028244623 |
| 9scP1Olrp.19Tk0dVU | ATXN7L3   | 56970     | 0.005222118 | 0.028250228 |
| xnkEUS.NPoXoquuBcE | GABPB1    | 2553      | 0.005224    | 0.02825035  |
| xcrRyBtPu..vr5RJ_o | BBS7      | 55212     | 0.005224499 | 0.02825035  |
| 9mt0pQ8e6JJ.T1xUfk | ATP6V1D   | 51382     | 0.005239949 | 0.028326495 |
| HkokooPnrl9PTgCTIQ | KYNU      | 8942      | 0.005240946 | 0.028326495 |
| EwZeQYTqwjnkPbnlbo | C12orf57  | 113246    | 0.005242441 | 0.028328184 |
| Tv66R568VepXg6JwDQ | ZNFX1     | 57169     | 0.005244878 | 0.028334959 |
| HqXkJ7vpTI6E4rTXlg | C10orf53  | 282966    | 0.005247813 | 0.028344422 |
| Z3oaJ56SfeYgiljugo | BCL7B     | 9275      | 0.005252077 | 0.028359636 |
| 00znBTqUpGukRFzDVI | UBE2Q2P3  | 100133144 | 0.005253627 | 0.028359636 |
| HUGS1RU3urBCqu2u98 | FAM86A    | 196483    | 0.005254181 | 0.028359636 |
| f19hdR5IUXV5e7u8.Q | SLC25A23  | 79085     | 0.005256507 | 0.028362695 |
| Bo.eJO5letycvUoHrk | PTBP2     | 58155     | 0.005257116 | 0.028362695 |
| Wo.816r4veu9J4G6.4 | NA        | NA        | 0.005261823 | 0.028381698 |
| cUziAh6lvHj4nGKfCk | CAPN7     | 23473     | 0.005265921 | 0.028397408 |
| uEk7md1eLI7snqjqj0 | PI16      | 221476    | 0.005272289 | 0.028425351 |
| cy75e3vcCYFJR.9Dek | SNX16     | 64089     | 0.00527683  | 0.028443431 |
| 3XigN0nkQXccZVD0ko | ERVW-1    | 30816     | 0.005285358 | 0.02848299  |
| KGQsQrgnrogmpvW4jU | GLTSCR2   | 29997     | 0.005291394 | 0.028509105 |
| rpdfoqXSKilgedLD.g | BRE       | 9577      | 0.005293499 | 0.02851403  |
| cQn9tLpBR3ykkkHr.o | AKIRIN2   | 55122     | 0.00529959  | 0.028540424 |
| Q9ZCSW9e6ZnkedxxFM | KIAA0895L | 653319    | 0.005303079 | 0.028547271 |
| fnXu8QqIHT_I0t76T4 | ZNF217    | 7764      | 0.005303245 | 0.028547271 |
| fUeh_BdAlwro6foQ4  | SLC51A    | 200931    | 0.005313158 | 0.028586724 |
| 3XA73lxXvrMCM.4kh4 | HIF1A     | 3091      | 0.005313656 | 0.028586724 |
| IS3DCed5V_50i6O86g | THBS1     | 7057      | 0.005314154 | 0.028586724 |
| Tept6hfg5eV6_7odfA | ARHGEF7   | 8874      | 0.005316425 | 0.028592517 |
| WdX1Uffdx_nnv8C.lc | EIF5B     | 9669      | 0.005320523 | 0.028603499 |
| T.fqlqLKqT1EqEGvyc | TNFSF15   | 9966      | 0.005320855 | 0.028603499 |
| HVIERN4hKFMPPsIUUI | USPL1     | 10208     | 0.005325064 | 0.028619701 |
| KEldJiLBSI9ep9Exs  | RPS6KB2   | 6199      | 0.005327777 | 0.028627861 |



|                     |            |        |             |             |
|---------------------|------------|--------|-------------|-------------|
| EjUqOiOoK8gKSV0XeI  | PLCG1      | 5335   | 0.005329937 | 0.028628408 |
| 9kpLnP37Iwg79QC2TY  | GALNT1     | 2589   | 0.005330269 | 0.028628408 |
| E3olf_gkR3jQd93IhI  | COL11A1    | 1301   | 0.005333869 | 0.028641319 |
| iWF6eoduDeiCJ6IOjI  | MRFAP1     | 93621  | 0.005340791 | 0.028672061 |
| in3Ep.6gsq6O6sqeoo  | AQP3       | 360    | 0.005343006 | 0.028677526 |
| KtS4ykCtY44iVSRSS4  | UBE2E3     | 10477  | 0.005344612 | 0.028679719 |
| K9aYLwFdonpdoeeqbw  | DPH3       | 285381 | 0.00534655  | 0.028683694 |
| 65m0l6Bqfj55Xwe73g  | DDX31      | 64794  | 0.005352475 | 0.028700953 |
| 3oeDevdd_xFXQVzkl4  | SUV39H1    | 6839   | 0.00535314  | 0.028700953 |
| Wkuz5QB48nLoSlzISl  | DYRK3      | 8444   | 0.005353361 | 0.028700953 |
| x6tNHeirkJTIT_6TU4  | NA         | NA     | 0.005359619 | 0.02872669  |
| cktZAXXgupJQS.4iJQ  | LCMT1      | 51451  | 0.00536056  | 0.02872669  |
| ioJ4pLCNH4ISiljns   | MRPS16     | 51021  | 0.005362886 | 0.028732726 |
| ZJfYtort4r5TSUqYrQ  | ALDH3B1    | 221    | 0.0053656   | 0.028740836 |
| xVei1iCgDoPevTHutU  | SMARCC1    | 6599   | 0.005366929 | 0.028741528 |
| ioNfvI44c7r1X4eghE  | N4BP2L2    | 10443  | 0.005369144 | 0.0287438   |
| EafR6Ev9fIKy.7uHuE  | ACTR6      | 64431  | 0.005369753 | 0.0287438   |
| 6i5k17W7Q7LksVInS4  | LOC285074  | 285074 | 0.005376011 | 0.028769774 |
| xgyyAFYT4799e_Qrpk  | USP6NL     | 9712   | 0.005377007 | 0.028769774 |
| B.qilyrqKSpDko1A10  | SSRP1      | 6749   | 0.005383487 | 0.028798009 |
| fpj49LIRDsBKvrL7x0  | GNAI3      | 2773   | 0.005387141 | 0.028811126 |
| EZ6.7RPSTzUpNKQTe0  | EEF1E1     | 9521   | 0.005391295 | 0.028826902 |
| 3Ug3LqOgv.nE7zUVSk  | CSGALNACT1 | 55790  | 0.005394285 | 0.028836455 |
| iqhFLp9AfXr9OM34hk  | BTN2A1     | 11120  | 0.005406025 | 0.028892766 |
| Wh7fgTVA5RaBVJXydU  | HRAS       | 3265   | 0.00541267  | 0.028919225 |
| ooqEhJ31.aJenLcoTQ  | POFUT2     | 23275  | 0.00541339  | 0.028919225 |
| rVcAz9465HHeKXs6Vc  | COL10A1    | 1300   | 0.005427456 | 0.028987902 |
| EUTVFXlcUX9iNKFbeg  | LDOC1      | 23641  | 0.005435486 | 0.029024316 |
| HrX_ilcVfVT0_UUuIA  | ZCCHC3     | 85364  | 0.00543831  | 0.029032925 |
| HiiibxNeM19Snnwg6Hk | CDC14A     | 8556   | 0.005446173 | 0.029068427 |
| QuP3P3IUSrCoYt96Ck  | NAA60      | 79903  | 0.005450161 | 0.029083228 |
| 6nqaSYeSLgD4xQpT1E  | AKR7A3     | 22977  | 0.005455754 | 0.02910659  |
| ok5.oLCCvHz7OICjpl  | PCDH11Y    | 83259  | 0.005457138 | 0.029107493 |
| ulc_jE.pPqeLuunTI4  | GDPD1      | 284161 | 0.005460738 | 0.029119927 |
| 3KehFd5YsOG7unqF98  | SLC7A5     | 8140   | 0.005461901 | 0.029119927 |
| 0t1UXM.OrvJkHn_cvk  | PTPN11     | 5781   | 0.005463617 | 0.029122598 |
| BSqCvpLShP_Ciz9xDk  | VPS13B     | 157680 | 0.005467826 | 0.029138547 |
| QcZ6LXge6sgBGF6f7I  | TMEM51     | 55092  | 0.005469155 | 0.029138862 |
| IAVCKaKtrjugW0ZAVA  | LOC613037  | 613037 | 0.005470318 | 0.029138862 |
| N553agoYC4XkKIgOQU  | APOBEC2    | 10930  | 0.005475911 | 0.02916217  |
| QsUXfXgXooAvbzoeNU  | ATP5F1     | 515    | 0.005478071 | 0.029167187 |
| NCqgXoKFHt98yV9IVU  | NA         | NA     | 0.005479289 | 0.029167191 |
| 9pXinsUzR4UrU3cVT4  | B3GNT2     | 10678  | 0.005487817 | 0.029206097 |

|                     |          |        |             |             |
|---------------------|----------|--------|-------------|-------------|
| KxAVOPtKiuUvEkrj0k  | SNX5     | 27131  | 0.005489811 | 0.029206676 |
| 3qMjwH5TjeCKir.9O0  | SNORA29  | 677812 | 0.005490364 | 0.029206676 |
| KfR.554lyexAfkf0.k  | MAP7     | 9053   | 0.005494407 | 0.029221692 |
| cTre2fodJ7kjp6nCHs  | ARMCX1   | 51309  | 0.005496511 | 0.029226394 |
| ZgiwQiyHoUgNoq6Qkk  | SAP30L   | 79685  | 0.005506534 | 0.029273193 |
| i.T1RVRWgXVflwT9V0  | ALPK3    | 57538  | 0.005515339 | 0.029313495 |
| csuYJy5lPkdSdKQQiQ  | PNPT1    | 87178  | 0.00551977  | 0.029330533 |
| xoVcSpHicqDvoj0ing  | FAM159A  | 348378 | 0.005528353 | 0.029361606 |
| B2oL_Xpy4CtB7l54J4  | MSH6     | 2956   | 0.00552863  | 0.029361606 |
| fon5df4OFyJEqKB_1M  | KDM1A    | 23028  | 0.005529294 | 0.029361606 |
| f4ongfnQ3Cnj7bvXfw  | NOX4     | 50507  | 0.00553079  | 0.029363037 |
| TUIIdM9NSfrtC6nvnll | AZIN1    | 51582  | 0.005535441 | 0.029381221 |
| NgVSgCgitgUFeaCiTo  | SIRPA    | 140885 | 0.005548843 | 0.029445828 |
| EfAg8beukb6dOXsNUk  | C11orf63 | 79864  | 0.005553162 | 0.029451821 |
| HnnVoDkDiHXoB6uoPo  | ISOC2    | 79763  | 0.005553217 | 0.029451821 |
| EUk3_443orP55056WQ  | CENPT    | 80152  | 0.00555366  | 0.029451821 |
| 6J6edla2E_D_rqr6jU  | PSMD13   | 5719   | 0.005568834 | 0.02952575  |
| uuVMyuJNX8jTqBSSHk  | KCTD3    | 51133  | 0.00557199  | 0.029535949 |
| KX8Pz_F1RxUg6iG5dU  | IGSF8    | 93185  | 0.00557631  | 0.029547236 |
| c9QtbkkcGz6ReXXfaU  | CCNDBP1  | 23582  | 0.005576587 | 0.029547236 |
| 3ii7fYSBiknupB7kiQ  | CHCHD5   | 84269  | 0.005582401 | 0.029571503 |
| iSVIkfHiLAinclFV8U  | C7orf25  | 79020  | 0.005589656 | 0.029603385 |
| KkXuZcB54_l0H5UpoY  | ACOX3    | 8310   | 0.005595083 | 0.029625577 |
| 9RrkTnpPQTugJ_3yKk  | PRKCB    | 5579   | 0.005599679 | 0.029638754 |
| u_5dlf.gLcX3A_VYY0  | ZRANB2   | 9406   | 0.005601063 | 0.029638754 |
| cgXgGuoISLM4jt9lp0  | PCM1     | 5108   | 0.00560206  | 0.029638754 |
| uSt_srl5N7eX3p4Q14  | MMP11    | 4320   | 0.005603334 | 0.029638754 |
| NhdSLgjq4cjjO7q6pY  | ATP6V0B  | 533    | 0.00560494  | 0.029638754 |
| fIU.eS.lQF3Hv6hLCU  | SLC38A9  | 153129 | 0.005604995 | 0.029638754 |
| cpUoJA1Xl.LOBRzCwU  | SDPR     | 8436   | 0.005606767 | 0.029640017 |
| rVUQ7jrP6KV7d66.8o  | ZNF564   | 163050 | 0.005607708 | 0.029640017 |
| ri1SpShgLuhJCA1FJQ  | C5AR2    | 27202  | 0.005609204 | 0.029641379 |
| feBBQNxXUaV4pfNL1E  | MTFR1L   | 56181  | 0.0056138   | 0.029652585 |
| ETs2gflHrqZrp35ew0  | KIAA0408 | 9729   | 0.0056138   | 0.029652585 |
| oVEkkEUpe0RI4O74qA  | ZFP14    | 57677  | 0.005616569 | 0.02966067  |
| cPQ3V8V4UNLpUD.UIU  | CCL28    | 56477  | 0.005617898 | 0.029661149 |
| 6CCWCiUSWgSUSULELk  | DDX24    | 57062  | 0.005633182 | 0.029723069 |
| xHIXUn5FSRReLcFJsw  | CEND1    | 51286  | 0.005633293 | 0.029723069 |
| cs6AcOeUd01W1QU3e0  | KLRG1    | 10219  | 0.005633348 | 0.029723069 |
| 9BFcKeuUsvOLJcUVXU  | TUSC2    | 11334  | 0.005652453 | 0.029814551 |
| Wf_S0NV51zX6VekBHo  | METTL4   | 64863  | 0.005653893 | 0.029814551 |
| KjWSirr6jEWjF3ndPk  | AKAP13   | 11214  | 0.005655056 | 0.029814551 |
| Hn5zwArwilK8VFLX5E  | UBQLN1   | 29979  | 0.005655665 | 0.029814551 |

|                    |          |        |             |             |
|--------------------|----------|--------|-------------|-------------|
| HI_fyRKzglIJSTdB7k | POLR1E   | 64425  | 0.005659486 | 0.02982813  |
| OnF7rjdku6ojstSECE | PPIH     | 10465  | 0.005662421 | 0.029837034 |
| HhOd5eoquns1e1RNIA | MEI1     | 150365 | 0.005671614 | 0.0298789   |
| Hq6nu7y94kDV0UIV9U | IFFO2    | 126917 | 0.005672998 | 0.029879622 |
| ivSAIJOIDzTfW9ue1g | YTHDC1   | 91746  | 0.005678204 | 0.029900465 |
| 9meCvVuUijAzHISujk | ATP5H    | 10476  | 0.005681028 | 0.029908762 |
| 03PBGkflRue9RfV254 | KIR2DL4  | 3805   | 0.005688448 | 0.029941248 |
| TuFxp19hxF2eexd1Bw | OGFOD3   | 79701  | 0.005698582 | 0.029977742 |
| xL515VdXgc.7nuzNHk | SSBP2    | 23635  | 0.005699081 | 0.029977742 |
| BiJI_e9VkOODqRr_lg | DYNC1I2  | 1781   | 0.005699136 | 0.029977742 |
| oiqXFSCXX4FLeQV53M | LZTR1    | 8216   | 0.005706169 | 0.030008146 |
| xJ4jblHkdCXrhImAdY | NA       | NA     | 0.005715417 | 0.030050183 |
| opVHSGUK5dWXddVSF4 | NA       | NA     | 0.005716746 | 0.030050575 |
| rqhJL.VL.pSktCX8Ek | NA       | NA     | 0.005720069 | 0.030059506 |
| rai2foXqKyK_W4pCNs | ZNF600   | 162966 | 0.005720955 | 0.030059506 |
| EoAKrdjUHVClq9_rcc | NA       | NA     | 0.005723281 | 0.030065131 |
| EeFAk7.CeQ5LLRq6wU | SLC33A1  | 9197   | 0.005725496 | 0.030070173 |
| T1JNZLsApVu7iqhudE | NA       | NA     | 0.005728707 | 0.030080447 |
| ORKUnUS75SjfDAbUSI | CTSG     | 1511   | 0.005730258 | 0.030081995 |
| 635eV13SFwpanUXHXs | LRRC29   | 26231  | 0.005733968 | 0.030089737 |
| rOXIVBFHqpPuEniheA | NA       | NA     | 0.005734245 | 0.030089737 |
| NoARMYCKIKIKJUW6OY | NA       | NA     | 0.005742995 | 0.03012905  |
| xhtE4IIAftHNSjjSiU | ZNF658   | 26149  | 0.005751744 | 0.030168345 |
| xAJUgOtf9K5d9AieEU | MAN1A2   | 10905  | 0.005756562 | 0.030182792 |
| QRE1ff_Dpd.uFJSF0o | PTH2R    | 5746   | 0.005757836 | 0.030182792 |
| Wfn.f1X3Dirp.l_FSU | RFTN2    | 130132 | 0.005758279 | 0.030182792 |
| Hq5QiHry0CXcgqjXb4 | NDE1     | 54820  | 0.005760439 | 0.030187507 |
| ISXoam6verSff8XQ.4 | DTX2     | 113878 | 0.005762543 | 0.030191929 |
| BQSpeUADaKvXXTdTdE | NCKAP5   | 344148 | 0.005766585 | 0.030206503 |
| HxeZJpXhXh9mZxaJEs | C19orf60 | 55049  | 0.005774615 | 0.030239169 |
| 3e78KW7T0lIk62aoQE | CSTB     | 1476   | 0.005776553 | 0.030239169 |
| xUrHKin.gVKKSK_SYk | SYAP1    | 94056  | 0.005776609 | 0.030239169 |
| OlQqAgCgp33VSL1U5l | IL16     | 3603   | 0.005789678 | 0.03030096  |
| WFEI.VSUiFFwoOKSc  | FBXO41   | 150726 | 0.005794551 | 0.030315247 |
| opEnnSQutKlCp5C4Pc | RAB12    | 201475 | 0.005794939 | 0.030315247 |
| 9VLCH9TfpJTX.wiwvo | NFE2L3   | 9603   | 0.005800199 | 0.030336143 |
| Wun30466_q6_07hq1U | APOL2    | 23780  | 0.005803467 | 0.030346605 |
| iBUXqoAydVCJ6RSxR4 | TREML2   | 79865  | 0.005805349 | 0.030347834 |
| 9CK0Ebj77GxE_53ouU | PTS      | 5805   | 0.005806235 | 0.030347834 |
| xuHTXt5wdSF1SfgIA0 | HPGD     | 3248   | 0.005810278 | 0.030362339 |
| xlfFSgM19OIEgOiplQ | ARHGAP22 | 58504  | 0.005811662 | 0.030362949 |
| ft2.uZursn_5Nd1S6l | USP5     | 8078   | 0.00581493  | 0.030364491 |
| NdUoH9ZRj1KOjPEnhl | DHX36    | 170506 | 0.00581565  | 0.030364491 |

|                    |            |        |             |             |
|--------------------|------------|--------|-------------|-------------|
| WI0KKABIBoIKKZieeQ | GADD45GIP1 | 90480  | 0.00581576  | 0.030364491 |
| EriIgoBfqKKE8evvek | SKAP1      | 8631   | 0.00582019  | 0.030379872 |
| OV6CMrJByHtv.romvQ | TFB2M      | 64216  | 0.005821243 | 0.030379872 |
| cV3sXdMHRqYewSvE0o | BACH2      | 60468  | 0.005827999 | 0.030408505 |
| roiPHloiL4KJ4hH5c0 | ARMC8      | 25852  | 0.005839074 | 0.030459658 |
| Hq_ffwEuJU0frO9Cg  | TPRG1      | 285386 | 0.005841511 | 0.030465734 |
| E2tWlb1Ijv1pL1nFKM | SCAND1     | 51282  | 0.00586272  | 0.030569694 |
| cVziqdayRepF5Z6Cc8 | NHP2       | 55651  | 0.005870418 | 0.030597319 |
| r1VvXS17NNTH7HF_1w | SRRT       | 51593  | 0.005871525 | 0.030597319 |
| 07fRpJv_dESSf_RIUo | BRE        | 9577   | 0.005873685 | 0.030597319 |
| oo0S4XMOJb7nUl6mEg | ICA1       | 3382   | 0.005874183 | 0.030597319 |
| HStUoIER1fXR.oefc  | RCE1       | 9986   | 0.005874405 | 0.030597319 |
| loHdF1upeA5_ovjoFA | MAPK9      | 5601   | 0.005877506 | 0.030600452 |
| iSTu5beUUblQq3fbus | WDR24      | 84219  | 0.005877561 | 0.030600452 |
| lQeP60vn1Dnr4.V0_4 | SNRK       | 54861  | 0.005881161 | 0.03060877  |
| ok1UgldTVKFK9V5ud8 | ADAM8      | 101    | 0.005881714 | 0.03060877  |
| 9VI6FKByREXk0kAv0U | ECD        | 11319  | 0.005891848 | 0.030654241 |
| OflyIEROp.oLYSF6n4 | C15orf39   | 56905  | 0.005893011 | 0.030654241 |
| Hg2fgVKKSI_S4lCHuU | RAB42P1    | 646996 | 0.00590165  | 0.030692513 |
| 6CXeJFC1CCBCCJm6Sk | ZNF598     | 90850  | 0.005908628 | 0.030722131 |
| KhwEH4Gcuv7XyEN7f4 | FBXO3      | 26273  | 0.00591123  | 0.030728994 |
| 6qFihO8XEIvepzX.T0 | TSEN15     | 116461 | 0.005914221 | 0.030737868 |
| WjeKKfbqf_rXcHKHV0 | NDUFB8     | 4714   | 0.005918873 | 0.030755371 |
| rde0g1Ben85FyO1UkU | ACSF2      | 80221  | 0.005921697 | 0.030763373 |
| ov7lXo1Bbl4JyDNV6E | TUG1       | 55000  | 0.005928674 | 0.030792944 |
| fuOQg6ELSoLT6gTo4o | MSS51      | 118490 | 0.005930612 | 0.030796333 |
| rHcKiOqeKEnQAoihKU | KAT5       | 10524  | 0.005932385 | 0.030798858 |
| ZrloLQqpB.gpXDCbbI | PSPC1      | 55269  | 0.005938587 | 0.030824378 |
| 3RXJ4KE1L1UnsvOzeU | THAP1      | 55145  | 0.005941688 | 0.030833793 |
| oX0Sci5TuSuj1OWSE4 | EZR        | 7430   | 0.005943405 | 0.030834227 |
| ucVyX7fxYqOcuLULro | BBX        | 56987  | 0.005944346 | 0.030834227 |
| ipQjZVHkdSXpDIWJ1s | AHR        | 196    | 0.005953926 | 0.030873997 |
| KokaNxRFPkz_EVfVSU | MGST1      | 4257   | 0.005954591 | 0.030873997 |
| ulJrj5x_Ky..EHFP1U | C3orf58    | 205428 | 0.005958135 | 0.030885688 |
| HMI5.VyOT_7KCzMT9U | RAB18      | 22931  | 0.005968435 | 0.030927992 |
| NKdH5f6fXvh99WFSAk | CSNK2A2    | 1459   | 0.005968878 | 0.030927992 |
| fiTSggyC0jnqfTF6uM | ADH4       | 127    | 0.005979677 | 0.030977245 |
| iQuv5dPl.IE3gvdJJE | FAM110B    | 90362  | 0.005983719 | 0.030991484 |
| NluJKtclmJdFufBM14 | PCIF1      | 63935  | 0.005987374 | 0.031003711 |
| HovebdquuHq1lOn2j0 | CCS        | 9973   | 0.005989201 | 0.031006471 |
| NpQIKSouicJEoA5Bh8 | RUFY2      | 55680  | 0.005991749 | 0.031012956 |
| o1ollD7q9elsoRPIM  | MUM1       | 84939  | 0.005993798 | 0.031013776 |
| 30nVYTk.Hd5bq3ktnk | COPZ1      | 22818  | 0.005995459 | 0.031013776 |

|                    |           |        |             |             |
|--------------------|-----------|--------|-------------|-------------|
| Q1egrVPf3Raep3.efU | CACNG7    | 59284  | 0.005995791 | 0.031013776 |
| u83eLlqepana6Ubew0 | NA        | NA     | 0.00599928  | 0.031023293 |
| NbISJwCi67psT5p1dY | ATIC      | 471    | 0.006000222 | 0.031023293 |
| 3o_eu1JOFTASTlIOOg | SERINC1   | 57515  | 0.006005759 | 0.031045224 |
| u33u1cKXrEuUJEx_s0 | ERO1L     | 30001  | 0.006009913 | 0.031059991 |
| c47tGUex1JeGkiYh1M | NA        | NA     | 0.006018607 | 0.031088632 |
| fD_Xvzrru9ey1SdVKI | ATG10     | 83734  | 0.00601988  | 0.031088632 |
| oor1HfeBfj9.qVujhl | AFTPH     | 54812  | 0.006021708 | 0.031088632 |
| WeiwnEo3Aklf.Ety8o | CAST      | 831    | 0.006021763 | 0.031088632 |
| H6UIFU7XoIKV4JdCSc | MORN1     | 79906  | 0.006022428 | 0.031088632 |
| E0ijiiizvuiCuchKZs | CBX5      | 23468  | 0.006025197 | 0.031088632 |
| 6eBSgRDSv0pS.jHp7U | CCNC      | 892    | 0.006026027 | 0.031088632 |
| HC3el0wCunurbSg3mU | ZNF581    | 51545  | 0.006027079 | 0.031088632 |
| fpizEUNKlqyeXkyiXY | PTDSS1    | 9791   | 0.006027135 | 0.031088632 |
| TT9JiEC5O.82LFe5FE | TMX3      | 54495  | 0.006038155 | 0.031138769 |
| QLHwCbrVS4pQgL9a8l | DYRK2     | 8445   | 0.006043969 | 0.031162046 |
| BnSl68J4p8X8MEl1Co | KLHL20    | 27252  | 0.006047514 | 0.031170042 |
| KJ6WLoAbUT4VBZLgql | RTN4      | 57142  | 0.006048123 | 0.031170042 |
| 9qaT8R7kLPiCLkwISo | MOB1B     | 92597  | 0.00604995  | 0.031172754 |
| 3.ShXloifzEPFjuD90 | HIAT1     | 64645  | 0.006051279 | 0.031172896 |
| TPtCTeird3ginNOieA | PGAM1     | 5223   | 0.006059863 | 0.031208825 |
| iuJP_CuFuPeygiew0  | FAM199X   | 139231 | 0.006060859 | 0.031208825 |
| BSUuUH2eUH_uU_v33o | MAGED1    | 9500   | 0.006065234 | 0.031221921 |
| 6hygVlnCze4pDd5gZ4 | PARP11    | 57097  | 0.00606601  | 0.031221921 |
| xk1dd53U0wec8IA9KU | FMO4      | 2329   | 0.006071492 | 0.031243426 |
| Nt9PX86l_enqn8Egdo | TMEM60    | 85025  | 0.006074205 | 0.031250676 |
| 9X76lBxAIC_1219V8k | FAM76B    | 143684 | 0.006085392 | 0.031301504 |
| QlSjj.uBbgsbiHlIZU | SOCS5     | 9655   | 0.006089102 | 0.031313864 |
| lKu11RLVnv17k9uFZ8 | PARVG     | 64098  | 0.006092314 | 0.031323657 |
| 9lSqrE6zoshNBBihPk | CCT7      | 10574  | 0.006106656 | 0.031390662 |
| x4v3t.fk3Qlpa5XYWU | GAL       | 51083  | 0.006119559 | 0.031450239 |
| EANqUrmOnRk7DVJH_o | LOC728903 | 728903 | 0.006124599 | 0.03146406  |
| uXfVcxe9UQOk1Zk5_U | MRPL10    | 124995 | 0.006124875 | 0.03146406  |
| iCKRVfVSXdl5HjkhAM | SCAMP4    | 113178 | 0.006130912 | 0.031484124 |
| l0zjrGkkqLpVS8E6e4 | KATNAL1   | 84056  | 0.00613141  | 0.031484124 |
| irgieSOWIJSQESpUeg | RNF114    | 55905  | 0.006133957 | 0.031490454 |
| NrjYut7vXPnrquMq6k | DCAF8     | 50717  | 0.00614542  | 0.031542543 |
| 3XUP9UDkNLsHKp7v3k | KPNA1     | 3836   | 0.006148909 | 0.031553689 |
| iqU8HSSU377OV4Xnk0 | TM9SF1    | 10548  | 0.006153395 | 0.031569944 |
| uF_JShglCEG4dULJKI | PAG1      | 55824  | 0.006158268 | 0.031576645 |
| 0SnH9bU7F5ALapCG7U | NCF1C     | 654817 | 0.0061586   | 0.031576645 |
| HX6eS6pfzUuUqKBBMs | AP1S1     | 1174   | 0.006158655 | 0.031576645 |
| rdd9atbqYt9NwqFCMc | KRT10     | 3858   | 0.006164027 | 0.031597423 |

|                    |              |           |             |             |
|--------------------|--------------|-----------|-------------|-------------|
| BrXrivr7l_4h1sTwIU | CCDC130      | 81576     | 0.006169509 | 0.03161876  |
| TohFHxQiSqSLUnwN3U | NA           | NA        | 0.006171503 | 0.031622212 |
| BSniAR4yFCK6Uq9Ugo | HM13         | 81502     | 0.006176487 | 0.031640981 |
| TjqCqK7QTl09xfXV3o | LOC100190986 | 100190986 | 0.00617909  | 0.031647546 |
| xniZB5VN4UeHQMYHn4 | WDR41        | 55255     | 0.006184904 | 0.031670555 |
| i7C5LqrCS17i6ZOBno | C16orf80     | 29105     | 0.006188338 | 0.031681364 |
| fmmHon0_Hml6KK6F5I | RCAN1        | 1827      | 0.006207443 | 0.031772382 |
| ZbnsZYTQjog6gtQqu4 | HNRNPM       | 4670      | 0.006210599 | 0.03177496  |
| rpSGCBPu1w6ykohQok | RPAP1        | 26015     | 0.006210599 | 0.03177496  |
| oRenVTf_FBVEAXnteE | C14orf93     | 60686     | 0.006216303 | 0.031779825 |
| o5Igl6ECKDhOYfh3io | NA           | NA        | 0.006216691 | 0.031779825 |
| ue44A16OnhQh6R_9SU | TIMM23       | 100287932 | 0.006216857 | 0.031779825 |
| uSreR7gdV6lwsLUfyA | ST8SIA4      | 7903      | 0.006216857 | 0.031779825 |
| 3uhJ1T6bjd3c5UVzIk | C5orf4       | 10826     | 0.006222062 | 0.031799648 |
| 9gjnHf10XnvtOXFOpY | ALDH6A1      | 4329      | 0.006228098 | 0.031823708 |
| fUleogerJK6eH38JF8 | ZHX2         | 22882     | 0.00623131  | 0.031833048 |
| oXUkKUoEd90UgBThSk | EDEM2        | 55741     | 0.006233802 | 0.031833048 |
| 6S0SU1qAN0zSV_KCUI | GART         | 2618      | 0.006234245 | 0.031833048 |
| QrJcvP4l6.Q7iBRvx4 | DACH1        | 1602      | 0.006235242 | 0.031833048 |
| Zr6CDmnTPxQt.eBl94 | TFPI         | 7035      | 0.006238177 | 0.031838984 |
| rUcQV_UBElR1P0hZfU | RPP21        | 79897     | 0.006239063 | 0.031838984 |
| lojuI9UIRes_V2Ly6w | NA           | NA        | 0.006243161 | 0.031853111 |
| rFFnu1lNW0J1NX_plQ | MED15        | 51586     | 0.006247425 | 0.031868078 |
| QeeYeOUoQX91SOWeIl | MT1F         | 4494      | 0.006257891 | 0.031914671 |
| Q7tADh.V5X5bq1pvXU | ZNF282       | 8427      | 0.006263484 | 0.031936396 |
| xqAcjPnn.4Gqyir8XI | NA           | NA        | 0.006268025 | 0.031952748 |
| 9kaiAuVAfRJPkKkDoE | CASP8        | 841       | 0.006274615 | 0.031978376 |
| 9dRvP9X95Jr5HErJx4 | PHF12        | 57649     | 0.006275723 | 0.031978376 |
| Z7IY_nf23U66fblurk | LOC653380    | 653380    | 0.006278492 | 0.031985681 |
| 0gSeUiYnk4gsTnnuTk | MARK2        | 2011      | 0.006286078 | 0.032005814 |
| l4opHgUXqoj6RQhRHg | RUVBL1       | 8607      | 0.006287241 | 0.032005814 |
| To.culnvg.rjtA79yo | TANK         | 10010     | 0.006288016 | 0.032005814 |
| 6f7g14RHjl6qPtjSIE | HERC4        | 26091     | 0.006289069 | 0.032005814 |
| i_az3_az37VbVUgp2U | TSPYL2       | 64061     | 0.006289124 | 0.032005814 |
| HlBzpe6NA1JeeXn.zo | TFAM         | 7019      | 0.006295105 | 0.032029445 |
| WX3QVN1cFUTn5S9_Co | N4BP2L2      | 10443     | 0.006302193 | 0.032053866 |
| uqVepLq.6kD1f3_TUQ | MBOAT7       | 79143     | 0.006302581 | 0.032053866 |
| QBUHuFVihS7ZVBBu5E | AZU1         | 566       | 0.006304962 | 0.03205917  |
| BJ6Kol6ijE0ZOluGE  | PRKD2        | 25865     | 0.006306402 | 0.032059685 |
| umeI99TcABXYVgFdFI | RERE         | 473       | 0.006317256 | 0.032108049 |
| B6p5otR01_XXdXq.7w | CXXC1        | 30827     | 0.006325894 | 0.032137156 |
| Bd.ovLdEO1PVcnXuc4 | C5orf54      | 63920     | 0.006326614 | 0.032137156 |
| NS5e5.uguV4AECoxJU | GFM2         | 84340     | 0.00632894  | 0.032137156 |

|                    |              |           |             |             |
|--------------------|--------------|-----------|-------------|-------------|
| 93aHHZ7H5Z3i0uIX28 | TAF6L        | 10629     | 0.006329328 | 0.032137156 |
| INSX0dSevADvknfNJB | MBNL1        | 4154      | 0.006331487 | 0.032137156 |
| 6li9utHkdSXpxluI9Q | FLJ35390     | 255031    | 0.006331875 | 0.032137156 |
| BswYp.47vieiuLoWqk | TRAFD1       | 10906     | 0.006332373 | 0.032137156 |
| laZRUdfefTV3QsunSc | NA           | NA        | 0.006338908 | 0.032157817 |
| iVurUn3V_oUp.UMqVM | C1QTNF9B-AS1 | 542767    | 0.006339129 | 0.032157817 |
| otHooUFXntQBFHn1xU | TPSAB1       | 7177      | 0.006342674 | 0.032168983 |
| EipSft36PuOga17i_I | GLYATL2      | 219970    | 0.006348267 | 0.032190535 |
| 6QfSUp3SHorvvpI4Uk | MICALCL      | 84953     | 0.006354746 | 0.032209393 |
| iRH.58Sq4Puy64Idp8 | HPSE         | 10855     | 0.0063553   | 0.032209393 |
| KghpNGCSdQCcGfqa5U | CTBP1        | 1487      | 0.006356019 | 0.032209393 |
| iRe6kupLt_uAqJox8  | NA           | NA        | 0.006361114 | 0.032222337 |
| QhFudW3dKSYL2NTQUA | EXOSC10      | 5394      | 0.006362388 | 0.032222337 |
| unQoCMCepoKK7m6feo | CD99L2       | 83692     | 0.006362609 | 0.032222337 |
| QSV64lChBREgJSj4Jo | FOXS1        | 2307      | 0.006367316 | 0.032239359 |
| laUymukmkiCuDuY8IA | TTI1         | 9675      | 0.006370473 | 0.032248525 |
| fgQrpK6olfxX3rgvAU | C11orf54     | 28970     | 0.006376454 | 0.032271981 |
| o4KOUIOIAJCq.tSulU | CRTC2        | 200186    | 0.006380275 | 0.032284498 |
| fr.cFeEaHuTH9XTU54 | CEACAM1      | 634       | 0.006385757 | 0.032305415 |
| BdVBLP9SyPcNO6ypII | NOVA1        | 4857      | 0.006389301 | 0.032310817 |
| usREehpJqKeof1PEDI | POM121C      | 100101267 | 0.006389523 | 0.032310817 |
| Qn5VH0iv_q9Kue7dV8 | LPPR2        | 64748     | 0.006397608 | 0.032344874 |
| EFVFeof6OdU3UXUuH8 | SP7          | 121340    | 0.00640381  | 0.032369399 |
| 9rKay.IHeNKxxNBQCI | TRMT1L       | 81627     | 0.006406911 | 0.032378242 |
| rrUXVUoObUUIXyTHvg | SNRPN        | 6638      | 0.006410898 | 0.032391558 |
| 6epeZ6CTNW4Au8uXys | IFNLR1       | 163702    | 0.006418263 | 0.032421933 |
| fftCuCoRC_UIFB.fl0 | CCL23        | 6368      | 0.006420534 | 0.032426564 |
| Krni7Ei6DCEiF5XQjQ | F2R          | 2149      | 0.006427511 | 0.032454961 |
| fpe7eXX6h7ourldLak | C21orf2      | 755       | 0.006433547 | 0.032474824 |
| 07aNe4sp6l1XqSr3UI | CHKA         | 1119      | 0.006434157 | 0.032474824 |
| 0qX.h4ukgoB50olgEo | VAPB         | 9217      | 0.006439473 | 0.032493277 |
| uL6367TOjSKRC5lp7o | GLRX         | 2745      | 0.006441134 | 0.032493277 |
| udc1Je_oOhUuMQF7Xo | DUSP11       | 8446      | 0.006441909 | 0.032493277 |
| f2KKH03cJkoKI43ro4 | SNX18        | 112574    | 0.006443238 | 0.032493277 |
| NoKif0I6yjPhweJ19E | TLK1         | 9874      | 0.006447336 | 0.032507099 |
| HkiKP97ToAJ_qT2.50 | SLC38A6      | 145389    | 0.0064552   | 0.032539897 |
| od_OUuSIUi0jYoS6s  | WDR59        | 79726     | 0.006458523 | 0.032549797 |
| BrKgPKvS.NHoT0opC0 | NMD3         | 51068     | 0.006461679 | 0.032557029 |
| 0eyOe_OOU9QnwNf10Q | PICALM       | 8301      | 0.006462676 | 0.032557029 |
| fVQNT77RSldUgXXS9c | NA           | NA        | 0.006465168 | 0.032562735 |
| 0kuXn.QqXhOgn.QSgc | PAGE2        | 203569    | 0.006470262 | 0.032581544 |
| Q6Ss7klyLu.Td9a5Sg | GOLGA80      | 728047    | 0.006480452 | 0.032625498 |
| NR_FUohsr7riel2ZT4 | VPS41        | 27072     | 0.006482113 | 0.032625498 |

|                     |           |        |             |             |
|---------------------|-----------|--------|-------------|-------------|
| BuuRF7LV8dXrp4pPNU  | NFYB      | 4801   | 0.006483221 | 0.032625498 |
| fxj2hBTiqy65yogpBc  | TGDS      | 23483  | 0.006484439 | 0.032625498 |
| 9CStJBnrZChxelRJ1M  | DDX41     | 51428  | 0.006493244 | 0.032662938 |
| NeJernR7prVbXpZgF8  | NKG7      | 4818   | 0.006497231 | 0.032676133 |
| uGHuuqW2t73r5d9eDo  | TRAPPC2L  | 51693  | 0.006499557 | 0.032680969 |
| E7BR7v83Hu77rpe_ik  | BAZ2B     | 29994  | 0.006503489 | 0.032693876 |
| 9eHSUp1eB..X7VNeq0  | ZSWIM1    | 90204  | 0.006509193 | 0.032705856 |
| ZXRS59MxTjMN4CqSPA  | LGALS3    | 3958   | 0.00650958  | 0.032705856 |
| 65Kn60nl70u0EfV5E0  | LSS       | 4047   | 0.006509968 | 0.032705856 |
| rsOfs7QS84KUppmmnRk | ZNF785    | 146540 | 0.006511629 | 0.032706325 |
| NXui3vHvf3kKHRdfiU  | RCL1      | 10171  | 0.006512792 | 0.032706325 |
| 3lC5T_q0k12.QRLud0  | FAM171A1  | 221061 | 0.00651689  | 0.032719026 |
| umgxKuruTo9qTggSok  | PRRT3     | 285368 | 0.006518053 | 0.032719026 |
| IRT9AVDBKlfohrE8SA  | P4HA1     | 5033   | 0.006526747 | 0.032751722 |
| Qnj6xMDf8Tpfrciiko  | GMPR2     | 51292  | 0.006527301 | 0.032751722 |
| HCA7U5JT.1B157EW9M  | STAG1     | 10274  | 0.006529128 | 0.03275403  |
| f4VwhebO4JJzi57j_8  | ANKRD13C  | 81573  | 0.006534057 | 0.032771892 |
| B5HriTdePUfH.dXuBl  | C5orf24   | 134553 | 0.00654264  | 0.032807389 |
| uVIDu14g6N_7F461K0  | ATRAID    | 51374  | 0.006544302 | 0.032807389 |
| iXu4qRBSlGoX3Nd7P4  | GSS       | 2937   | 0.006545243 | 0.032807389 |
| xYfXovD30klrhXqJsc  | SOCS4     | 122809 | 0.0065484   | 0.032816344 |
| fmEsnX95cs3kgR6fwE  | RAP1A     | 5906   | 0.006578912 | 0.032962358 |
| KNnO6Us5RIO1wFfnl0  | EIF2AK1   | 27102  | 0.006582789 | 0.032974883 |
| uSp6d678QnodKjXXpY  | MAN1B1    | 11253  | 0.006586278 | 0.032985461 |
| fpFQr9494VJLrXgiJ4  | MKRN2     | 23609  | 0.006595193 | 0.033023209 |
| BtSj5dH4h_cpd57ueo  | EOMES     | 8320   | 0.006596688 | 0.033023793 |
| uuQN5TCdCnuHqgAj4k  | PIWIL4    | 143689 | 0.006600454 | 0.03303574  |
| QrqXuuOv5NfxV_1Qwl  | RUSC1     | 23623  | 0.00660937  | 0.033056616 |
| lFqIGELeEqNiJunOEI  | PQBP1     | 10084  | 0.006609924 | 0.033056616 |
| lyUeSX3wny7_RLMXf0  | SDE2      | 163859 | 0.006609924 | 0.033056616 |
| KUknUYwCoFeJIETkQE  | LINC00158 | 54072  | 0.006610145 | 0.033056616 |
| cPv_v5x9XRUF6XW9FU  | ATP2A2    | 488    | 0.006613689 | 0.033067437 |
| 9pdF4l04AMa6o1EgV0  | MRPL30    | 51263  | 0.006615683 | 0.033070501 |
| 6lFZSiOe9_m_edeUvs  | PF4V1     | 5197   | 0.006617787 | 0.033074119 |
| xKpnfhHuX0.1JUSXq0  | TYSND1    | 219743 | 0.006621553 | 0.033086035 |
| HrVfcM_l0wKr1Hsf1k  | TNPO1     | 3842   | 0.006633459 | 0.033138614 |
| TityCxcBee9RJS1fQk  | PCGF6     | 84108  | 0.006645642 | 0.033192554 |
| 9oen96_j9Kwju.Cllk  | IGF2BP3   | 10643  | 0.006647857 | 0.033196682 |
| 6N57mluB51BaSoCpiA  | NA        | NA     | 0.006649352 | 0.033196682 |
| lS7rgr4eCC1Lu1LwBl  | TM9SF2    | 9375   | 0.006650626 | 0.033196682 |
| 0ofRQkgMVokZTUQrnk  | MCM5      | 4174   | 0.006653727 | 0.033205242 |
| Nt5nhVLi16tSixuzhc  | NA        | NA     | 0.006655499 | 0.033207167 |
| BnWcV6qY_yd4Tej_B0  | SELENBP1  | 8991   | 0.006658102 | 0.033210187 |



|                     |         |    |        |             |             |
|---------------------|---------|----|--------|-------------|-------------|
| oSqTeop3p5feT8.l.8  | DBNL    |    | 28988  | 0.006658877 | 0.033210187 |
| 96UQgwkkDAQc6e_K90  | BPGM    |    | 669    | 0.006663695 | 0.033227297 |
| r57BOXu0dHyX6T_5IQ  | ELF2    |    | 1998   | 0.006670229 | 0.033252958 |
| 9wOYQGdYWeS3lel794  | NA      | NA |        | 0.006671835 | 0.033254043 |
| QoK0tv9LeDq_tfu0yE  | GIN1    |    | 54826  | 0.006677207 | 0.033273893 |
| rqSigEWV3snnYOGknc  | DIDO1   |    | 11083  | 0.006678979 | 0.033275801 |
| iHXTXVINxS.Osgl6gU  | SUCLG2  |    | 8801   | 0.00668352  | 0.033291501 |
| 3p.gR5U0nEtPHvVQVE  | MOB4    |    | 25843  | 0.00670484  | 0.033389882 |
| uoGop4DoAnl_lefp4s  | PLCB2   |    | 5330   | 0.006706058 | 0.033389882 |
| flNOuHtOvcSA5XU7tU  | SCAMP1  |    | 9522   | 0.006719903 | 0.03345186  |
| 9IUULEquOg7YAF.ogU  | DENND4A |    | 10260  | 0.006721453 | 0.033452627 |
| W.pn.uZlat7650i7rQ  | STMN1   |    | 3925   | 0.006724    | 0.033458353 |
| uuQv3UvqO_3eVr6F10  | GOT2    |    | 2806   | 0.006725994 | 0.033461322 |
| NTqUQN3ELI5zV3VHVQ  | ERF     |    | 2077   | 0.006732916 | 0.033488804 |
| le_2uBruJviriSTiCk  | LIN7B   |    | 64130  | 0.006737125 | 0.033502781 |
| BgnopJMCh0KFEI3IRQ  | CABP2   |    | 51475  | 0.006738675 | 0.033503537 |
| iS6ICa13gOv11QVWT8  | TCF7L1  |    | 83439  | 0.006744988 | 0.033527965 |
| BurpKiIBUXKXdLu1KM  | OXER1   |    | 165140 | 0.006749197 | 0.033541925 |
| 3pepuuigquegQwGkc0  | ZNF787  |    | 126208 | 0.006754347 | 0.033558824 |
| 9d3kd4KilS6eQz33_o  | BREA2   |    | 286076 | 0.006755399 | 0.033558824 |
| i5Ozsr6ou7urX6d_k   | IL11RA  |    | 3590   | 0.006769631 | 0.033618142 |
| cSh25fee90_6UIDtUk  | UBXN1   |    | 51035  | 0.006770628 | 0.033618142 |
| flpurnxSezSjUKDv6g  | NA      | NA |        | 0.006771569 | 0.033618142 |
| cVVwoA7kvDicQrnW6o  | SMG8    |    | 55181  | 0.006772954 | 0.033618142 |
| EiHe.NHJfe1dWSCHvo  | UBE2E2  |    | 7325   | 0.006775169 | 0.03362217  |
| W86SN38b.90Tc3nLUo  | HOOK3   |    | 84376  | 0.006777716 | 0.033627845 |
| ELpdHfTqf6LXfXnneo  | TMEM258 |    | 746    | 0.006781593 | 0.03364011  |
| flifq_fv7VZVd7pPs   | BCORL1  |    | 63035  | 0.006783254 | 0.033641385 |
| 9kJvkoOp_klOJfPotM  | PLA2G16 |    | 11145  | 0.006785469 | 0.033645404 |
| xXpGALJZ3r4J.nz7BI  | OGT     |    | 8473   | 0.006794662 | 0.033684013 |
| Hk_Xggv6Kelkksh6UE  | FAM13A  |    | 10144  | 0.00679804  | 0.033692304 |
| BkpeHhSu3TTII8CEh4  | ATL2    |    | 64225  | 0.006799147 | 0.033692304 |
| xV9iOlkxeAjrxYMISU  | RYK     |    | 6259   | 0.00680391  | 0.033708931 |
| QH4ofdRFVPSOXiBJwk  | PCNXL4  |    | 64430  | 0.006805959 | 0.033712109 |
| QB76KIJ4KKeIviSL_U  | TPM2    |    | 7169   | 0.00681936  | 0.033771507 |
| TtIEjsVHJUUr57i0mgk | PRKAB1  |    | 5564   | 0.006823679 | 0.033785913 |
| 3Ug97zKRcFGSTigBpE  | ATAD1   |    | 84896  | 0.006825341 | 0.033787155 |
| KfL1Og.wk_9VdwXu3A  | METTL2A |    | 339175 | 0.006830989 | 0.03380416  |
| clf.Luzyjup6.n.cUU  | CEP135  |    | 9662   | 0.006831598 | 0.03380416  |
| o41hH6KJiq5K63.rl8  | GDPD3   |    | 79153  | 0.006841123 | 0.033839089 |
| ZL0u4I5eIX0FZJ1WI8  | NA      | NA |        | 0.00684284  | 0.033839089 |
| NQsE3s0pXEyBMS_Lql  | CNBP    |    | 7555   | 0.006842895 | 0.033839089 |
| Wr6LOKZgFIIKCUKJ6U  | PCYT2   |    | 5833   | 0.006851423 | 0.033874269 |

|                    |           |        |             |             |
|--------------------|-----------|--------|-------------|-------------|
| NU1f07SI6f6PV73u50 | NA        | NA     | 0.006853915 | 0.033879597 |
| 0EtTxLz75yNRdP5I7U | NECAB1    | 64168  | 0.006856629 | 0.033886017 |
| cn0YiBJ9ANdXOEeDrl | UHRF1BP1  | 54887  | 0.00686045  | 0.033894746 |
| WSvO46XO6C4IKhZBXk | TOE1      | 114034 | 0.006861225 | 0.033894746 |
| fKXK9X6Ke6QtdDXu1Q | CPNE1     | 8904   | 0.006865489 | 0.033908391 |
| ITfxFw1QKd.wiUZO.0 | HIST1H2BD | 3017   | 0.006866818 | 0.033908391 |
| EOOpG09B53gqng4A6U | SNORD6    | 692075 | 0.006871525 | 0.033914489 |
| QuR4kOirriolOeeD3o | TGIF2     | 60436  | 0.006872079 | 0.033914489 |
| ORu4E3t_tEiernlrRc | CLPTM1L   | 81037  | 0.0068723   | 0.033914489 |
| f9c2p1eap.d0cQtCfo | RAB3B     | 5865   | 0.006875125 | 0.033921438 |
| lp2dShffRCOH52e8Xk | LGMN      | 5641   | 0.006882711 | 0.03394336  |
| c2heKCLqilKpxwhHnc | GGT5      | 2687   | 0.006883542 | 0.03394336  |
| ok0fqPDOqOSTzjurQo | CTLA4     | 1493   | 0.006883819 | 0.03394336  |
| rnFetSzdV.zkqOjOqE | TAS2R4    | 50832  | 0.006887474 | 0.033954393 |
| NOqruFANLqO6SgnkIQ | METTL17   | 64745  | 0.006899324 | 0.034005817 |
| HqCKfuFLFDfi.f.e1E | GOLPH3    | 64083  | 0.006901761 | 0.034010828 |
| EMSF.koXji4V96J6Uo | PISD      | 23761  | 0.006907686 | 0.034028756 |
| rtyX5WJ.XxDSJV3Rfs | PUM1      | 9698   | 0.00690824  | 0.034028756 |
| uuJQDpnHkdSFqhlulc | FLJ45256  | 400511 | 0.006910732 | 0.034034032 |
| cUSJ2.kBKqPAk0eZPY | DBNDD1    | 79007  | 0.006913667 | 0.034041488 |
| uAAppoS_llqOiHrqhk | ZNF579    | 163033 | 0.00691627  | 0.034047305 |
| 9oCnoJ5ISjVyfv97S0 | NUMB      | 8650   | 0.006919039 | 0.034053937 |
| 0_DHz7_krTURH3IVHk | GIMAP4    | 55303  | 0.006924244 | 0.034072556 |
| cdCev.e907C4eo57fM | CUL5      | 8065   | 0.006932108 | 0.034100783 |
| ulXud57eilG6O9OI5M | ABCB9     | 23457  | 0.006932828 | 0.034100783 |
| i_eVnlShmq6qEollus | RGS3      | 5998   | 0.00693532  | 0.034103938 |
| fk7oOl.JLr2nfHaTSI | ZNF345    | 25850  | 0.006936316 | 0.034103938 |
| IXV3WT31frOkSsAa9U | LENG8     | 114823 | 0.006941134 | 0.034120622 |
| QPPEuunHNerKFaV61U | PRCC      | 5546   | 0.006954923 | 0.03418139  |
| HR0lh8yURBQ3efSHeo | NFIL3     | 4783   | 0.006956972 | 0.034184446 |
| QUcilHt9An3dFclArU | SH3KBP1   | 30011  | 0.006959021 | 0.034187501 |
| 9XmkEbkV4ohK6S42cc | RNASE4    | 6038   | 0.00698012  | 0.034284121 |
| HkuvclG3upP8l7rfll | SATB2     | 23314  | 0.006987651 | 0.034314077 |
| TNJCXUutQFJZe9luje | NA        | NA     | 0.006990863 | 0.034322813 |
| i6IU16KIG6OkU31Zrg | C20orf201 | 198437 | 0.007004319 | 0.034381834 |
| HpJXi5Tjd3lD1kLQTQ | GPN3      | 51184  | 0.007010799 | 0.0344028   |
| N5WgRv7rV49TdyMeSo | FLJ45721  | 401123 | 0.007011463 | 0.0344028   |
| fJUdX0lAn_P9VLTgJU | PDE12     | 201626 | 0.007021874 | 0.034441413 |
| rk4ofDg1AXu05e7kxU | ARHGAP21  | 57584  | 0.00702276  | 0.034441413 |
| oXrp3_6KAcBPV_Ot0l | ANXA1     | 301    | 0.007023646 | 0.034441413 |
| NK6TUmKnG573FB45KI | USP21     | 27005  | 0.007038598 | 0.034501149 |
| xkhAF34BX1VokQHZU4 | SKAP2     | 8935   | 0.007038709 | 0.034501149 |
| Zdl45Se3VG7s869FKo | FKBP5     | 2289   | 0.007040702 | 0.034503861 |

|                    |           |       |        |             |             |
|--------------------|-----------|-------|--------|-------------|-------------|
| HrlpdGldVMghRCK.TU | NAIP      |       | 4671   | 0.007047015 | 0.034527735 |
| 30gU06noT6H11qJp74 | NA        | NA    |        | 0.007049064 | 0.034530711 |
| uunH5T.hNB0.5inykk | STAG2     |       | 10735  | 0.007055211 | 0.034553756 |
| WvHo8nV117uOsU5Mi0 | NA        | NA    |        | 0.007067394 | 0.034606348 |
| W5K0su5K08CNO4UPuQ | DNAAF2    |       | 55172  | 0.007069941 | 0.034611746 |
| Nogg1NFWj7gBE3Fh40 | SULT1B1   |       | 27284  | 0.007078248 | 0.034645331 |
| KklWK2P7VJfFogCJzo | KRT1      |       | 3848   | 0.007083841 | 0.034665624 |
| 0EnXekOzeCqAldeEII | PHF10     |       | 55274  | 0.007086831 | 0.034670157 |
| cW9Lul4ARTu5QvUvRk | EPB42     |       | 2038   | 0.007087662 | 0.034670157 |
| fYA66gFwgKKKns9HjU | MSTO1     |       | 55154  | 0.007089323 | 0.034671203 |
| QSqseF_P3XEKFEeX_4 | FAM126B   |       | 285172 | 0.007091483 | 0.034674686 |
| QctVUciHiC_XZAYkqk | SRCAP     |       | 10847  | 0.007096135 | 0.034687603 |
| urvnvgtB7f3e39.BU  | NA        | NA    |        | 0.007097021 | 0.034687603 |
| OuDlvkuBOouSc3dSNc | NUDT16P1  |       | 152195 | 0.007099402 | 0.034689145 |
| c.X.ui5dNEoa4d6qUk | GNB1L     |       | 54584  | 0.007100233 | 0.034689145 |
| rTv.MyvRF7HyioV7U0 | ZNF800    |       | 168850 | 0.00710494  | 0.034705064 |
| QUjl0QreJ1N4Kf1Tn4 | NA        | NA    |        | 0.007109259 | 0.034714934 |
| I5U67JZQmik6eWgrx4 | NA        | NA    |        | 0.0071102   | 0.034714934 |
| QeCHl6CqWZu705cxjA | PDCD2     |       | 5134   | 0.007111308 | 0.034714934 |
| HL9LK0yoji.s57HOSY | SLC39A6   |       | 25800  | 0.007123325 | 0.034763482 |
| 3qF5zUniWUVzdSeX8A | ANKRD39   |       | 51239  | 0.007124155 | 0.034763482 |
| BerWUUVKgnouj6oDc  | LOC642131 |       | 642131 | 0.007131188 | 0.03478498  |
| Z7F7hRdNX5eUe5fZdQ | APBA3     |       | 9546   | 0.007131465 | 0.03478498  |
| EainiEog2fAXqKalsQ | LEP       |       | 3952   | 0.007136117 | 0.034800583 |
| NHdIgl8CTX9.hfeCAI | CLK1      |       | 1195   | 0.00713955  | 0.03481024  |
| H6Q1LvH71cPwll8dA4 | LOC285453 |       | 285453 | 0.007143704 | 0.034823402 |
| rST4gID0UqFI557xaU | COPB1     |       | 1315   | 0.007148355 | 0.03483304  |
| ZJXg9V5xFRSQe0AtUk | DENND1C   |       | 79958  | 0.007148798 | 0.03483304  |
| EXIf4.daSVI70vd_IU | PPP1R11   |       | 6992   | 0.007150349 | 0.03483304  |
| BkFP31fRfXffEvVSi0 | MED4      |       | 29079  | 0.007151733 | 0.03483304  |
| fSVd01eiR3lnQiev7w | DGUOK     |       | 1716   | 0.007152952 | 0.03483304  |
| WeO6OoM6g8q6q6qOCo | CHTF8     |       | 54921  | 0.007154558 | 0.034833779 |
| Hnfd6p6BL485BVPu6I | REPS2     |       | 9185   | 0.007158545 | 0.034846109 |
| 012RuCR9VN5N9oR1Ck | PACS2     |       | 23241  | 0.007160483 | 0.034848462 |
| WKKge_QJT9NiCqEgog | GOPC      |       | 57120  | 0.007166574 | 0.034871023 |
| c.s.wi3TncW_gcll6U | COMMD2    |       | 51122  | 0.007170063 | 0.034880914 |
| 3JUUILUV0Ili7lrXUo | CD8B      |       | 926    | 0.007174936 | 0.034897533 |
| rp.cFx1eDWrXT7gOTk | GTF2H3    |       | 2967   | 0.00717909  | 0.034910646 |
| iSSDIGJQIIIABoVWtl | NFATC2    |       | 4773   | 0.007182357 | 0.034919445 |
| xL74krW4PtJme6mHu4 |           | 2-Mar | 115123 | 0.007190719 | 0.034948336 |
| 3X10r9Wlq4EhtJIO.U | ZNF841    |       | 284371 | 0.007191217 | 0.034948336 |
| rtniLXoHBLefWDgBVU | TMEM171   |       | 134285 | 0.007202403 | 0.034995599 |
| NmmkE6aG4wO0u4F6KU | MED27     |       | 9442   | 0.007215085 | 0.035045959 |

|                    |           |           |             |             |
|--------------------|-----------|-----------|-------------|-------------|
| 6HIFLVSeSF9NV9N1Rw | NEDD4     | 4734      | 0.007215694 | 0.035045959 |
| Tqi7yiSUoe7Lu7_vk0 | ACSL3     | 2181      | 0.007219072 | 0.035046696 |
| 9Lqi6J561QUd6Szgvk | RASAL3    | 64926     | 0.007219847 | 0.035046696 |
| lquKq5M7O3OAlw0.eo | SCARNA9L  | 100158262 | 0.007220235 | 0.035046696 |
| 37OZSp290efO99qPeo | ATRAID    | 51374     | 0.007222228 | 0.03504927  |
| 3lyuECQhUSwJVRFU3Q | FOXRED2   | 80020     | 0.007226769 | 0.035064204 |
| EiIOjXTK0qLqoqpA4k | MPZ       | 4359      | 0.007242552 | 0.035128699 |
| BqhUIQt0kAeK_NKF0U | TTC16     | 158248    | 0.007242995 | 0.035128699 |
| N3KrO.Rfj.pWvf0u9Y | GORAB     | 92344     | 0.007249086 | 0.035150992 |
| ELJ8x4rufQqJPMqSAE | NAA16     | 79612     | 0.007250526 | 0.035150992 |
| Inh66qnp.oDH_Ko14o | AQP7P2    | 389756    | 0.00726498  | 0.035213936 |
| cg3lIXU33F3g6UV8hU | C2        | 717       | 0.007269077 | 0.03522035  |
| 6reV_Ju.qyk7kP7ck4 | GABBR1    | 2550      | 0.007269244 | 0.03522035  |
| BLqXXe66p7_nyiOeyw | PPIP5K1   | 9677      | 0.007272012 | 0.035221932 |
| Zrq7stusfxl2u.KiiU | PPARG     | 5468      | 0.007272511 | 0.035221932 |
| Qv9W.zupDDtA7nOSUo | CHD1      | 1105      | 0.007275667 | 0.035230097 |
| HSKDKbS0AV.k1vsnq8 | NDUFAF7   | 55471     | 0.00728126  | 0.035250054 |
| r91ApHhXaXcf7VdF1E | APLP2     | 334       | 0.007287186 | 0.035271611 |
| u_IMielUKBPKuB5ckU | NA        | NA        | 0.007289512 | 0.035275741 |
| Bn7Gglc7ng4XopIJSU | NOP16     | 51491     | 0.007291948 | 0.035280405 |
| 3mkS1R9VN1ULK67yAE | RBM14     | 10432     | 0.007294274 | 0.035284531 |
| iFKdoH18iU4J6iCCX0 | THYN1     | 29087     | 0.0072966   | 0.035288656 |
| TTqQfpKljrlsorbo68 | TRAPPC9   | 83696     | 0.007300421 | 0.035294758 |
| BSv4q.kgJSoFRItFBU | ADAM12    | 8038      | 0.007300809 | 0.035294758 |
| r6tEU_H4EunUCSrfbk | RAB9B     | 51209     | 0.007317754 | 0.035366419 |
| o4IEHnoRESlooLdVZQ | ZNF408    | 79797     | 0.007318585 | 0.035366419 |
| 0P4XS5XhxB6A5QAdi0 | LOC440354 | 440354    | 0.007325617 | 0.03539121  |
| 6n6Sz9J6eig_iApVBQ | PGM3      | 5238      | 0.00732667  | 0.03539121  |
| oU.VH5F9O96RS6NJ_k | HINT3     | 135114    | 0.007328719 | 0.03539397  |
| NWruleih25y6N7.3Lg | APTX      | 54840     | 0.007337025 | 0.035425953 |
| QXF50KEKqLER660Dqo | FLNA      | 2316      | 0.007338299 | 0.035425953 |
| 9ChS7dUoN5KLeCKKC0 | NBPF14    | 25832     | 0.007346772 | 0.03545971  |
| 9ipKgN4iXX1JVMGe8E | ALKBH4    | 54784     | 0.007358788 | 0.035510555 |
| NdWrNtp0it1IBDJ5YI | TSHZ2     | 128553    | 0.007363495 | 0.035526112 |
| 6ewSAlc_5fF7uf_6kU | LEMD3     | 23592     | 0.00737291  | 0.035564369 |
| l3jfXmngWVp4lhPlps | NA        | NA        | 0.007375346 | 0.03556447  |
| NnIE7SI85wq4sPU65E | TLR4      | 7099      | 0.0073759   | 0.03556447  |
| ECu1ECuSIC6D3ak24k | NA        | NA        | 0.007387086 | 0.035611238 |
| oop4pqiNEK0ojYhSXg | CCBE1     | 147372    | 0.007398494 | 0.035654284 |
| fPrHvXvpYuiHrvdAVo | EEF1A1    | 1915      | 0.007398992 | 0.035654284 |
| N_SBCFmApJdJEiS2iY | TCF20     | 6942      | 0.007408351 | 0.035692202 |
| Tkh.l..QK6JuDFIKNQ | ID2       | 3398      | 0.007412449 | 0.035692276 |
| 09X4mEul0cT5Upy34E | SMCHD1    | 23347     | 0.007412726 | 0.035692276 |

|                    |            |        |             |             |
|--------------------|------------|--------|-------------|-------------|
| 9T0pSSQp4mJYuj4JzQ | PLEK2      | 26499  | 0.007412836 | 0.035692276 |
| upYpIANHgFQikiviwk | PDXDC2P    | 283970 | 0.007418651 | 0.035713095 |
| Oir4855D8k76Btyogo | MBNL1      | 4154   | 0.007422195 | 0.035722977 |
| IUsngpB5DX0479X6Ug | COX7B2     | 170712 | 0.007449828 | 0.035843437 |
| 3UKNL_7uiAS1SVfSUE | DPH3       | 285381 | 0.007450216 | 0.035843437 |
| r1H6LejoROpSqd4JJc | CTDNEP1    | 23399  | 0.007454978 | 0.035844174 |
| Tr9d1x1fXynXgdv51w | LPHN1      | 22859  | 0.0074552   | 0.035844174 |
| lv7C90iLat5C5.5eUo | TPD52      | 7163   | 0.007455421 | 0.035844174 |
| cDnsTvfjBDqQrcoSk  | CPNE1      | 8904   | 0.007457193 | 0.035844174 |
| r1SJJToKJ6VORTUXUQ | EFNB1      | 1947   | 0.007459741 | 0.035844174 |
| iOaabrgMjmmFijjuic | NA         | NA     | 0.007461513 | 0.035844174 |
| 3fllNUrcl8okDssjLY | CD226      | 10666  | 0.007462122 | 0.035844174 |
| BIUkUu3l3iDvpJ0Sik | C2CD2L     | 9854   | 0.007464393 | 0.035844174 |
| HimdKgJ6HHAuB6OIRE | PIK3CB     | 5291   | 0.007465666 | 0.035844174 |
| ckLEgoNz3SSpMqRkek | YEATS2     | 55689  | 0.007466552 | 0.035844174 |
| NdK3qgt7npN10_5fTQ | ORAOV1     | 220064 | 0.007466829 | 0.035844174 |
| iV0M0XV9I5HV4h14ll | CA11       | 770    | 0.007471702 | 0.035860381 |
| fmqlpRI0U0OI8uAOUk | KAT5       | 10524  | 0.007488703 | 0.035934753 |
| cPOnvClqauHSkrDVIE | CHST12     | 55501  | 0.007490198 | 0.035934753 |
| HDdnj_muzpuebuOiqc | PTGES2     | 80142  | 0.007492579 | 0.035938979 |
| lLkJVlh77K_f.fXXqQ | CKAP2L     | 150468 | 0.007501661 | 0.035970526 |
| KVCrdCXkLUgrhAVKJE | GAB3       | 139716 | 0.00750216  | 0.035970526 |
| itUnHeilyuog2fgVKI | NA         | NA     | 0.007516225 | 0.036030755 |
| EK.h0Lunsep0lp9F3o | TRIM69     | 140691 | 0.007528187 | 0.036080875 |
| fcDhLUFEVik0M1lq9c | FBXO22-AS1 | 692224 | 0.007536327 | 0.036112665 |
| EkpJz_qN.0Xvjq7eh4 | NA         | NA     | 0.007539872 | 0.036118912 |
| HIeop_ypN9SuqAS3yM | NAT9       | 26151  | 0.007540647 | 0.036118912 |
| xe7erFd4spcw9cX4e4 | CLNS1A     | 1207   | 0.007575147 | 0.036276909 |
| fuCaSeKIdaZ2U6WGAI | SUMO2      | 6613   | 0.007579632 | 0.036291135 |
| lSdFQN653UAlAUm3pM | TRIM69     | 140691 | 0.00758146  | 0.036292631 |
| 3OZ6_QLrtJ7qjfV28  | C12orf76   | 400073 | 0.007584062 | 0.036297836 |
| QuRIVe73mrgQeVHBSE | SLC29A3    | 55315  | 0.007588936 | 0.036303905 |
| u.85SBn13Vee3eqeUU | MUSTN1     | 389125 | 0.007589157 | 0.036303905 |
| 9VKUMJ6u3AKEn3fUdA | SEC31A     | 22872  | 0.007589877 | 0.036303905 |
| ch1ejw57sVupCuVg90 | C9orf72    | 203228 | 0.007596245 | 0.036327112 |
| 3K5fXeeCXxdfdFSwa8 | DCAF5      | 8816   | 0.007603832 | 0.036356135 |
| oKdJESnRF4DfJH2op4 | PHKB       | 5257   | 0.007609536 | 0.036369153 |
| BUINU8erKxUDTnnMCE | LOC642441  | 642441 | 0.007609591 | 0.036369153 |
| oiWIOYR5HUnu4SDiFM | DOPEY2     | 9980   | 0.007619061 | 0.036407147 |
| 99Hur6qJw.wk70uknU | KAT7       | 11143  | 0.007622439 | 0.036410879 |
| c7r8OtEAO8kecUdJG4 | XPO4       | 64328  | 0.007622882 | 0.036410879 |
| 67q3iOV.gDI4CAE6nE | BMP2K      | 55589  | 0.007628918 | 0.036432446 |
| cfn Vlei5LpMNMnRY  | PACRGL     | 133015 | 0.007643537 | 0.036494987 |

|                    |           |        |             |             |
|--------------------|-----------|--------|-------------|-------------|
| WEio37sV9FSXVUOKE0 | C5AR1     | 728    | 0.007650847 | 0.036520882 |
| fXKXTDPCh19LqX0H3o | TIGD7     | 91151  | 0.00765201  | 0.036520882 |
| 06PijuKCzmp1BPuSec | RAB43     | 339122 | 0.007655776 | 0.036531576 |
| l1yrnc4j7HKXOCLrCU | PSMA2     | 5683   | 0.007659541 | 0.036542265 |
| 0lN3jqIq4oDSeDr6Xk | BMPER     | 168667 | 0.007663806 | 0.036555328 |
| QELQRxGDUE0DUuXl0U | ZNF280D   | 54816  | 0.007667848 | 0.03656703  |
| HnxA7Cv3hCH6i49EXo | ZNF611    | 81856  | 0.007669786 | 0.03656703  |
| Zbl1wp_LkrFbvXIkSg | HPS1      | 3257   | 0.007670838 | 0.03656703  |
| KEkqdJ9eX1MntOl0Xo | IL34      | 146433 | 0.007674327 | 0.036576382 |
| WnurCgttU.zo7oB4p4 | KRI1      | 65095  | 0.007679311 | 0.036592855 |
| r5CoSql4cVLf4fs13U | RCSD1     | 92241  | 0.0076828   | 0.036602198 |
| r7l6MXi0UrooB1T4Tk | NA        | NA     | 0.007684683 | 0.036603888 |
| TolOgh0XTVd3ke56K4 | DISC1     | 27185  | 0.007691217 | 0.036620713 |
| EPpKw_.8QINReH1XDk | PTPN22    | 26191  | 0.007691273 | 0.036620713 |
| Q.iPIVATn.A7dOUKR4 | TSPAN2    | 10100  | 0.007699081 | 0.036650606 |
| o7A8tqbrtG5ew1yedo | SSTR2     | 6752   | 0.007702071 | 0.036657556 |
| uY6is7vVIEIkeIK2vl | ARHGAP9   | 64333  | 0.007704618 | 0.036662396 |
| BEK5wBK9FWMek3TUKU | HIST1H2BG | 8339   | 0.007719958 | 0.036728093 |
| N61Ln2EolhoFkkJR30 | GNA12     | 2768   | 0.007721508 | 0.036728175 |
| IKR6E10bovRKdNLg94 | ZWILCH    | 55055  | 0.007727766 | 0.03674993  |
| Kb35rqL1UH0ElgkKH4 | TBRG4     | 9238   | 0.007729151 | 0.03674993  |
| WSVBygKlOpIqesILN8 | EEFSEC    | 60678  | 0.007731642 | 0.036754483 |
| QQ_AvQlOfyklkpJdE0 | TMTC4     | 84899  | 0.007741167 | 0.036792461 |
| BpCli6vQCHXqdF7yZ4 | ELK1      | 2002   | 0.007749917 | 0.036826739 |
| B..eUSuXRdl9dAXQeU | NA        | NA     | 0.007753904 | 0.036838378 |
| 6y75E6gqcMjnhluBB8 | SCAND2P   | 54581  | 0.007759497 | 0.03685764  |
| ByLH7TfgzJdVClgSro | ATP5L     | 10632  | 0.007761491 | 0.036859801 |
| BIPkiQnlGCFXqTj.n4 | TRIM65    | 201292 | 0.007772179 | 0.036903241 |
| 9od6r.x7xeNDhll94o | NCL       | 4691   | 0.007780928 | 0.036937464 |
| TVKHn3g55x_P3901Rk | SLC2A14   | 144195 | 0.007785967 | 0.036954063 |
| QjdRaX_9.wB_DMrqIQ | SKAP2     | 8935   | 0.007792945 | 0.036979853 |
| ZiipCmiNNXoue9Nhis | RUVBL2    | 10856  | 0.007800642 | 0.036996581 |
| uvhdNXp9F_v.VNcvdU | RUNDC3A   | 10900  | 0.007802414 | 0.036996581 |
| QOuikeSiRXyhVBSNeM | LLGL2     | 3993   | 0.007804131 | 0.036996581 |
| ZS9NP658t.sKnd7r_E | CGGBP1    | 8545   | 0.007804131 | 0.036996581 |
| WiuuqFKnOoukrPOEtg | RBM3      | 5935   | 0.007804796 | 0.036996581 |
| u_M5UdFdhg3lZ.qe64 | UBE2G1    | 7326   | 0.007805737 | 0.036996581 |
| ZWnSV5oVaiC.VIADIQ | WIPF1     | 7456   | 0.0078105   | 0.037011831 |
| 6fIJR4Q903itTlJCfU | SQLE      | 6713   | 0.007818086 | 0.03703995  |
| 0hEailPubl0ZeVO1NM | CPNE7     | 27132  | 0.007819526 | 0.03703995  |
| iQXrIhiSxS5UUS04EE | NRG4      | 145957 | 0.007828774 | 0.037076424 |
| TIOl54HqO6B7pq6lrc | IMP4      | 92856  | 0.007830657 | 0.037078011 |
| cVdrdRuuzo3utPtXeQ | MAP1LC3A  | 84557  | 0.007838963 | 0.037110007 |

|                    |          |        |             |             |
|--------------------|----------|--------|-------------|-------------|
| K7nqHc5RF1ESF6Oeo0 | NA       | NA     | 0.007845719 | 0.037126797 |
| NjaJ39f4ylgSVQ416c | GPAM     | 57678  | 0.007846384 | 0.037126797 |
| fKX7pFITCFV4CzTV14 | IFIT1B   | 439996 | 0.007847436 | 0.037126797 |
| WB7qFX0j1eKzp_tHdl | ASPRV1   | 151516 | 0.00784871  | 0.037126797 |
| rQIIXIN7le6l.1eqQ  | EFNA4    | 1945   | 0.007851312 | 0.037131255 |
| cwlXToW1wOUKHonWjU | PUS3     | 83480  | 0.007852752 | 0.037131255 |
| WgE3ITuz46SJ75UQmU | SEC22C   | 9117   | 0.007856906 | 0.037143561 |
| f0kUU1G5UE_USiJJ74 | NSF      | 4905   | 0.007871968 | 0.037202157 |
| 0Xp5AqKP3maruK6Mf4 | SH3RF2   | 153769 | 0.007872688 | 0.037202157 |
| Nk5D7voLtfRzfu47IQ | EGR2     | 1959   | 0.007875401 | 0.037202157 |
| NsnkLfaAtJOjBleOgc | BZW1     | 9689   | 0.007875512 | 0.037202157 |
| T5hLiAd15UuF5jAaCY | TECTB    | 6975   | 0.007882379 | 0.037227252 |
| 0bXcbaCQhWIK7rEK7o | SNCB     | 6620   | 0.007888692 | 0.037249723 |
| ciiQyV6IEJurKX9Gz0 | WDR7     | 23335  | 0.007891793 | 0.037257023 |
| cgXxUBC6iJSiUBzSnU | MRPL42   | 28977  | 0.007897442 | 0.037276342 |
| Q5WnVJIExyokVII5Q  | TNNI2    | 7136   | 0.007900321 | 0.037280155 |
| iUjsMeQIAWOOKWrmuk | FUT6     | 2528   | 0.007902204 | 0.037280155 |
| E4IQPUenXUeAHHAWug | SYTL2    | 54843  | 0.007903533 | 0.037280155 |
| f9xeS0CutZkCiZejig | PAM16    | 51025  | 0.007904474 | 0.037280155 |
| 6JRerWovqhJIGH4RO8 | C19orf52 | 90580  | 0.007907188 | 0.037285611 |
| 6fcKJSKiTr5CFWk1G4 | RHPN1    | 114822 | 0.007909015 | 0.037286888 |
| i6R6e1TOs1KJRQ7e_l | TRIM6    | 117854 | 0.007938199 | 0.03741711  |
| iq.jDdUtflAj4iKeiQ | GOLT1B   | 51026  | 0.00794202  | 0.037421177 |
| uVidV71X0_AFFGuU3c | PLIN1    | 5346   | 0.007942186 | 0.037421177 |
| cl36CSOeh6ule_H8uE | ARNTL    | 406    | 0.007947226 | 0.037437557 |
| BWJS0cCeV11x71c79M | BCL2L15  | 440603 | 0.007956307 | 0.037472123 |
| rumM4io5LI.VT09eOg | RCAN1    | 1827   | 0.007957692 | 0.037472123 |
| urhR0mXXqIH47649ol | HAUS8    | 93323  | 0.007981726 | 0.037570785 |
| fus3S8iikgj96Uuilo | ZNF274   | 10782  | 0.007981781 | 0.037570785 |
| r7ps55zuCSyee06UKo | RARS     | 5917   | 0.007987374 | 0.037589726 |
| ZTm7jaB0r8RAeKqVSU | PARP6    | 56965  | 0.007989811 | 0.037593807 |
| fX0VMsNdeqSATBFUCk | HECW1    | 23072  | 0.007991804 | 0.037595802 |
| fUhfy_1TrvDAvIAgjs | TSNAX    | 7257   | 0.008005372 | 0.037652233 |
| fKXiljVdN0U7ChEkgo | TMEM229B | 161145 | 0.008020766 | 0.037713217 |
| 9nknJ9j71HsdSXrhJI | NA       | NA     | 0.008021486 | 0.037713217 |
| cTqn3heJFCvioSjyko | TRIB3    | 57761  | 0.008023868 | 0.037717009 |
| oepSSVaqCniMSihOgo | NA       | NA     | 0.008031122 | 0.037743703 |
| 3RKQjV2kt3ffcVtcVI | ARSA     | 410    | 0.008034888 | 0.037750231 |
| xmt6AGJw9bljorvjo4 | NA       | NA     | 0.008035663 | 0.037750231 |
| fhAXzoAquFyyLsOqCo | CDC42    | 998    | 0.008038542 | 0.037756354 |
| 9ndUbcRU0XUI4qZB4g | NDUFAF3  | 25915  | 0.008049618 | 0.037800962 |
| TKQ0XipKIUI4cE6IBU | STAR     | 6770   | 0.008051279 | 0.037801353 |
| Z91KEkulXb.NPVLU_0 | BPTF     | 2186   | 0.00805953  | 0.037832678 |

|                    |          |        |             |             |
|--------------------|----------|--------|-------------|-------------|
| EWH7QVJRO.0VAuACrI | NA       | NA     | 0.008069664 | 0.037865408 |
| OpfE0sntlqAh7ksPtE | PSMA6    | 5687   | 0.008069664 | 0.037865408 |
| ZFKukgCoAgHeDWFLso | GKAP1    | 80318  | 0.008079079 | 0.037902158 |
| IjRkYLoYHhUjzZYbtU | POLR2I   | 5438   | 0.008085835 | 0.037926425 |
| 3SJ7tOU1.qV3noAsg0 | PRRC2C   | 23215  | 0.008090708 | 0.037939308 |
| QKXrqq6oBdfUXifn4I | NCDN     | 23154  | 0.008092701 | 0.037939308 |
| KSXiDheV6VSVx3uwya | LAT      | 27040  | 0.008093753 | 0.037939308 |
| KJSJKLSQBECpQs0c   | NA       | NA     | 0.008094916 | 0.037939308 |
| 9qXFTnUfuAFiVSKUsA | C6orf25  | 80739  | 0.008097353 | 0.037943304 |
| o1JoLelcUAnqlqDiJc | ZNF599   | 148103 | 0.008103998 | 0.037967016 |
| TRdVLD79fW_VKEenpc | CLDN9    | 9080   | 0.008108705 | 0.037974992 |
| NCIzVf0lLh2tdL551o | RAPGEF1  | 2889   | 0.008108871 | 0.037974992 |
| HhXkL490_Uj1Pff310 | USP6     | 9098   | 0.008121221 | 0.038025391 |
| HJnPV6lCq_14OliKAU | NA       | NA     | 0.008126758 | 0.038041633 |
| oc7114q45GTNN39Aog | NA       | NA     | 0.008127866 | 0.038041633 |
| TpJ.Q.nyCkM8gryL0k | NA       | NA     | 0.008133514 | 0.038060275 |
| uS6PrTer3AqCLE5xwU | RB1CC1   | 9821   | 0.008135176 | 0.038060275 |
| NpT7uXl8uHW6.7iiSI | SGSM2    | 9905   | 0.008136615 | 0.038060275 |
| QV5qUIFx54SEI4JSKI | TSKS     | 60385  | 0.00814099  | 0.038073304 |
| WJWhuCK5eDlciieoFc | HDGFRP2  | 84717  | 0.0081447   | 0.038083221 |
| l1.i64TUrpJ6qdeHsk | NA       | NA     | 0.00815273  | 0.038113327 |
| K46liNKNqpJJ1JIBJI | SCRN2    | 90507  | 0.008156939 | 0.038125561 |
| Hld3RXjKDq.nq7cgvI | RAB3GAP2 | 25782  | 0.008161424 | 0.038139085 |
| Er2FTSQkoV.Sw_d6fc | VPS13B   | 157680 | 0.008168457 | 0.038164505 |
| 6txq5SNLKI7j9e0u10 | FOXO3    | 2309   | 0.008171337 | 0.038170514 |
| HLL6X0VEgUJ1A3rBVI | KIR3DL1  | 3811   | 0.008178591 | 0.038196953 |
| 6u6A.5eC11FwAXjIPo | PYHIN1   | 149628 | 0.008181969 | 0.03820528  |
| Trdwwj_xUurQfeQD1s | SCOC     | 60592  | 0.008190774 | 0.038238941 |
| oKI7qJeQHR50IIToh0 | SLC2A1   | 6513   | 0.00821813  | 0.038359179 |
| EINShZAeUKE1V91xyk | LCE1C    | 353133 | 0.008222339 | 0.038371346 |
| Qk3tfSrnaEg98USQKQ | KDELR2   | 11014  | 0.008225551 | 0.038378858 |
| lqF9uQey03wKfdNR7k | UBE3A    | 7337   | 0.008230867 | 0.038396184 |
| HUO0UfqfB6sP7rcpf8 | PI4K2B   | 55300  | 0.008243493 | 0.038441408 |
| ip6UxEyk0vwQU0hdJ4 | BTAF1    | 9044   | 0.008245155 | 0.038441408 |
| cv9_VS0p0JXuvsoMCU | ACSS2    | 55902  | 0.008245376 | 0.038441408 |
| iL3o6P66XhOMV5Se4o | PAK1     | 5058   | 0.008248588 | 0.038445289 |
| fKROo6O1LnFFQIV198 | PDZK1IP1 | 10158  | 0.008249419 | 0.038445289 |
| EE9E6Glafi91zIU1EE | KCNN2    | 3781   | 0.008268081 | 0.038524767 |
| B0LdF0khEolUbe1FEg | ZNF133   | 7692   | 0.008274615 | 0.038546866 |
| okEmkBx6lCOJBVE._o | EBLN2    | 55096  | 0.008276775 | 0.038546866 |
| TTST3gDPTRTjt4i72g | CYP4Z1   | 199974 | 0.008278547 | 0.038546866 |
| QbkediEQueey8mfLhE | TASP1    | 55617  | 0.008280983 | 0.038546866 |
| rkS_KJSiffA018gW4U | CNIH4    | 29097  | 0.008281537 | 0.038546866 |



|                     |          |        |             |             |
|---------------------|----------|--------|-------------|-------------|
| QXoX_OgSOoollooboo  | EWSR1    | 2130   | 0.008282479 | 0.038546866 |
| HUIWOSiJ7V_fUj65JA  | SUPV3L1  | 6832   | 0.008294108 | 0.03859349  |
| ZoEIAdygVXgVQiKihU  | BOLA1    | 51027  | 0.008297984 | 0.038604029 |
| 6dTVikIKv7.md17RA4  | SUN2     | 25777  | 0.008301695 | 0.038606809 |
| 9gEXSkD8mNBUmI_eVE  | FAM21C   | 253725 | 0.008301805 | 0.038606809 |
| cf5Mg7QnBSm1nH0gi4  | RBX1     | 9978   | 0.008303965 | 0.038609357 |
| WseSffulxLvO.nslMI  | PLAG1    | 5324   | 0.008311496 | 0.038636875 |
| lklI6yJkjlRR4CLh.g  | CASP1    | 834    | 0.008314542 | 0.038638611 |
| oRR0i4XtXu4qfSYpXg  | CHCHD10  | 400916 | 0.008315096 | 0.038638611 |
| 36T2QkuqCqIjiutLM   | ZNF664   | 144348 | 0.008323569 | 0.03867048  |
| fuspSX4JTZEtyAfuyc  | RHOT1    | 55288  | 0.008329217 | 0.038689219 |
| EJlIm5SWS7_ol4KCHg  | XAB2     | 56949  | 0.008340237 | 0.038732537 |
| QK93eT_VfyPuA7p0K0  | HEPACAM2 | 253012 | 0.008342784 | 0.038732537 |
| NXuX5S6j1_7t07erU4  | TP53BP1  | 7158   | 0.008343394 | 0.038732537 |
| rqd_zS5Sew7.wOS6eU  | WAPAL    | 23063  | 0.008357625 | 0.038786143 |
| l1XUoFCi6V1K6SRwoQ  | CDK2AP2  | 10263  | 0.008358179 | 0.038786143 |
| oqde_X9IoleEcSb6RI  | SENP2    | 59343  | 0.008360228 | 0.038788137 |
| 9tludLIBUKj39SibFY  | N4BP2L2  | 10443  | 0.008364658 | 0.038798736 |
| 9Lh4luqX.n.l6Myq50  | VAMP4    | 8674   | 0.008366707 | 0.038798736 |
| ZOIE_n_SUh01JmklESE | ANKFY1   | 51479  | 0.008367372 | 0.038798736 |
| TnJevX.OhODIdEegoI  | ZNF700   | 90592  | 0.008387086 | 0.038882623 |
| oqJ5InGSX2uS20du3Y  | BEX1     | 55859  | 0.00839207  | 0.0388982   |
| rWndtHqd7.R723nt7s  | CDC37    | 11140  | 0.008406413 | 0.038951566 |
| l4rXoubiXronhdnWqQ  | APRT     | 353    | 0.008407465 | 0.038951566 |
| uqfQlfdJ9iTp.6e0qQ  | RGS3     | 5998   | 0.008408462 | 0.038951566 |
| WU1wle66LX7oHokJ_M  | MCEE     | 84693  | 0.008413612 | 0.038967888 |
| KAE6QwOnbqd6dXqFV0  | DBN1     | 1627   | 0.008431111 | 0.039033841 |
| fym1RkpUR5V3T3fQHs  | CCDC28B  | 79140  | 0.008431111 | 0.039033841 |
| EsEq5LvzH0_dfShOo   | NA       | NA     | 0.0084552   | 0.039132548 |
| 9Fpv4ukL7_8SYEUnnU  | NA       | NA     | 0.008455698 | 0.039132548 |
| BSRJpeeh3iB6gl0iQk  | RSAD1    | 55316  | 0.008465777 | 0.039170976 |
| ZO9XA.cr5G5cDnjuLo  | NA       | NA     | 0.008467272 | 0.039170976 |
| Te16d57VUIq59irih8  | PPP4C    | 5531   | 0.008471592 | 0.039173761 |
| OLSevQpTaid5dQtX0   | PIANP    | 196500 | 0.008473253 | 0.039173761 |
| oVyFwHu0SH3g78pLnl  | PRRC1    | 133619 | 0.008474084 | 0.039173761 |
| lI4OOJc7V5cEeu3R00  | UBL3     | 5412   | 0.008474416 | 0.039173761 |
| 95AnNWVVFevTgH4k9A  | CLOCK    | 9575   | 0.008480507 | 0.039194356 |
| itCiKv_InV1UcKHov8  | DYRK1B   | 9149   | 0.008482335 | 0.03919524  |
| WJ57JeCCEI.ehCdJUo  | PLXDC2   | 84898  | 0.008506534 | 0.039299482 |
| xlBPS3rO4pubgkIHxO  | GPR56    | 9289   | 0.00850875  | 0.03930044  |
| BXgSgmgkoKB4gRSTec  | DSCR9    | 257203 | 0.008510023 | 0.03930044  |
| OVYLNK7XdM9eVXtLoE  | SPG21    | 51324  | 0.0085139   | 0.039310763 |
| rjpoCCkUqRLoR01bhl  | PNMA6A   | 84968  | 0.008522982 | 0.039345112 |

|                     |          |        |             |             |
|---------------------|----------|--------|-------------|-------------|
| c4rSi_iOJehBOKAVRc  | FCF1     | 51077  | 0.008534555 | 0.03939095  |
| fov6B3FesoCRZJO6ol  | ATP1A1   | 476    | 0.00853738  | 0.039396394 |
| W9COkUnf6lyjHlqVVA  | FAM195B  | 348262 | 0.008540591 | 0.039403625 |
| r4mlOXXq54G_T3teOE  | WDR61    | 80349  | 0.008552664 | 0.039451724 |
| ou6e0uhOqJ6OgOXdH0  | TMEM214  | 54867  | 0.008558478 | 0.039470945 |
| QyH0RUOAlSU_WpGunQ  | FKBP1AP1 | 2282   | 0.008564293 | 0.039490158 |
| rSw_oSAdSsDqi6lleQ  | ZNF551   | 90233  | 0.008567782 | 0.039498642 |
| 3w3E00.VNqn4fcX8f0  | NA       | NA     | 0.008592867 | 0.039599304 |
| TSLMUe3XSVdeKVetLA  | ZNRF4    | 148066 | 0.008592923 | 0.039599304 |
| iqnlp9.Siniv6KQDQU  | CDK5R2   | 8941   | 0.008596578 | 0.039608527 |
| ZSdOqCUTITV.fv_RnY  | DPF2     | 5977   | 0.008599513 | 0.03961443  |
| 3cF54icA_kvPIW5fSk  | LSM12    | 124801 | 0.008603611 | 0.039625687 |
| 9KKuqV6OH9SXfQeH50  | AAMP     | 14     | 0.008613468 | 0.03966346  |
| ZLhThgPJkun_qHJjXo  | DPM3     | 54344  | 0.00861607  | 0.03966782  |
| N64I.IFOAFEyeFKnuc  | MPZL1    | 9019   | 0.008621165 | 0.039683648 |
| Kn13qArhuSe.jdSAJ0  | WDR34    | 89891  | 0.008623823 | 0.039688257 |
| fNnSpdXSm5atdqOSUs  | NA       | NA     | 0.008636671 | 0.039739749 |
| HciCy4UgSplsrVdTpU  | NA       | NA     | 0.008644368 | 0.039767528 |
| KNh5NRcNDiROu1pmg   | RRP9     | 9136   | 0.008653395 | 0.039801409 |
| QpXR8m6KCgSginjgCk  | ATG4A    | 115201 | 0.008656662 | 0.039801662 |
| KKjd1TljoKRICuYegE  | NHLH2    | 4808   | 0.008656773 | 0.039801662 |
| KsXk0b6uv1PyFiltr0g | HERPUD1  | 9709   | 0.008659818 | 0.039808024 |
| lrZIUUpSYlclLihHgs  | ZBTB32   | 27033  | 0.0086622   | 0.039811331 |
| opfFAkAirklO6izt5Y  | UBE4B    | 10277  | 0.008669122 | 0.039829897 |
| Ke91CgveyXS7OOoJ50  | PON2     | 5445   | 0.008669565 | 0.039829897 |
| 9jh60.38H_QHrfXnpE  | AMY2A    | 279    | 0.008677761 | 0.039853016 |
| QuUT_ksQOLeLsMISI8  | FNDC3A   | 22862  | 0.008678093 | 0.039853016 |
| TN9VNamUSCRtF9xShc  | THOC6    | 79228  | 0.008679588 | 0.039853016 |
| OuNJKi.P4oTS0X_q_U  | EML4     | 27436  | 0.008686012 | 0.039874868 |
| fUJNKqCCSljmlCMoX4  | PTK2B    | 2185   | 0.008699191 | 0.039925841 |
| ouQ97oe0DIAToJQ7I4  | DISP1    | 84976  | 0.008704286 | 0.039925841 |
| ZJW63Sl1B.pfShFewg  | TESK1    | 7016   | 0.008704342 | 0.039925841 |
| 32q0vCXsz3yf_P_kc   | SENP7    | 57337  | 0.008705283 | 0.039925841 |
| fgB4n1rRlgbkhj1VIM  | BABAM1   | 29086  | 0.008705449 | 0.039925841 |
| cPiyQJRnVRKH6EipUQ  | ADRB3    | 155    | 0.008709547 | 0.039933407 |
| HyCkilplOfiVKL6IUg  | SPC24    | 147841 | 0.008710433 | 0.039933407 |
| 6hvwI7qJAJ4SJLUEVY  | ZAK      | 51776  | 0.00871514  | 0.039947342 |
| rkQpPtH5_lkEUzTqJI  | NDUFAF6  | 137682 | 0.008727711 | 0.039997308 |
| KTqv.epSX8gR7yrExk  | UBE3A    | 7337   | 0.00874006  | 0.040042386 |
| flouv7hCaDUDpPYunU  | KYNU     | 8942   | 0.00874089  | 0.040042386 |
| ool5dTI6cP_z.yyKSo  | NUDT4P1  | 440672 | 0.008746539 | 0.040055479 |
| ZRlikoaSJtj9UWJjxg  | SLC2A4RG | 56731  | 0.008747093 | 0.040055479 |
| 3gRRofXYRTQiQXoSJU  | IDH2     | 3418   | 0.008760549 | 0.040109433 |

|                     |            |        |             |             |
|---------------------|------------|--------|-------------|-------------|
| El4rhISpK6wQBb4F1Q  | SCAF4      | 57466  | 0.008786134 | 0.040218881 |
| cn6iivkuJ4jrlHkfyU  | NA         | NA     | 0.008799867 | 0.040273706 |
| rqn0d10hGC06BSJ83U  | FAM13A-AS1 | 285512 | 0.008801473 | 0.040273706 |
| ufotTnSgnkooXkgogo  | SIPA1      | 6494   | 0.008820024 | 0.040350526 |
| TbejaQEeO.jpCQegjg  | NA         | NA     | 0.00882163  | 0.040350526 |
| KXojSHvn9k47Oy7dOE  | PAPOLA     | 10914  | 0.008824621 | 0.040356498 |
| Op6aNQkDpQ4jT7gpKo  | CXCL1      | 2919   | 0.008835253 | 0.040397409 |
| i19Aylel7it559Hqly  | SLC6A17    | 388662 | 0.008839683 | 0.04040781  |
| I_UK0fW.F9Oue_VXVk  | FZD5       | 7855   | 0.008840902 | 0.04040781  |
| xO5llGVpwf_z.yylas  | RPLP0P2    | 113157 | 0.008844003 | 0.040414272 |
| QReRUDdTdKZx96QpM0  | ZNF397     | 84307  | 0.008854026 | 0.040452358 |
| cpmaUokZO_s_HwCvT.s | ILKAP      | 80895  | 0.008858124 | 0.040463363 |
| ZR4iVBSRFxlV1JiEOU  | SWI5       | 375757 | 0.008865932 | 0.040489274 |
| rVQkOyK78CpXeeni6Q  | ELOVL6     | 79071  | 0.008868036 | 0.040489274 |
| 6e6OuU9JCy8vSqtJC0  | GABPB1     | 2553   | 0.008868867 | 0.040489274 |
| x08Z4gLV165NEtICW4  | RPL3L      | 6123   | 0.008871137 | 0.040491923 |
| l6J.qOJU6K0TF0JI    | CNPY4      | 245812 | 0.008881825 | 0.040522964 |
| orkgnGUd.HNUUovep0  | GPR141     | 353345 | 0.008883154 | 0.040522964 |
| HoQKpA66k6AB4JWJeU  | MED11      | 400569 | 0.008883985 | 0.040522964 |
| ZReSd0XqL7i7ns657c  | OR9K2      | 441639 | 0.008884705 | 0.040522964 |
| xL1pxzzqHSz655r5rU  | NA         | NA     | 0.008896445 | 0.040564452 |
| xRCe9.VLxANe72vsF4  | THUMPD1    | 55623  | 0.008898881 | 0.040564452 |
| ZKBJ6l5lpZTioplak   | NA         | NA     | 0.008898881 | 0.040564452 |
| oIEUCiFM6uAkFJHlek  | FAM120AOS  | 158293 | 0.008903755 | 0.040578944 |
| WF_ziugieiGHiZxeQ   | RNF31      | 55072  | 0.008906413 | 0.040583337 |
| otK9W6tH5x1wqC.feU  | TSR1       | 55720  | 0.008910012 | 0.040592017 |
| 9UUtp.otGonLI50RP8  | EIF4E3     | 317649 | 0.008917322 | 0.040617594 |
| rjkSKESCh_kkq44XjQ  | TRAT1      | 50852  | 0.008925075 | 0.040645178 |
| r6qwCr8e46NenNXcoo  | DENND2C    | 163259 | 0.008927179 | 0.040647034 |
| WdqooAICVEu_AqmsaE  | NA         | NA     | 0.008939307 | 0.040694518 |
| EL6d6X.nME5e7R0luk  | NA         | NA     | 0.008944069 | 0.040695428 |
| rt4nqPbBSkl4dQDQz0  | ALG10B     | 144245 | 0.008944346 | 0.040695428 |
| Eq.ex8Xr_ULOUu44B4  | NA         | NA     | 0.008945011 | 0.040695428 |
| uWhno74XoYLseXwYf4  | TRAK1      | 22906  | 0.008947115 | 0.040695428 |
| KQpKVROrRH6nneAwJ74 | SCNN1D     | 6339   | 0.008948001 | 0.040695428 |
| xtSndQGgdxISWVbC7Q  | WDR20      | 91833  | 0.008951822 | 0.040705077 |
| WgeUI0vtG6HfJlQ8_U  | OR2A9P     | 441295 | 0.00895891  | 0.04072361  |
| 6lI3pT_sTDUKSMJ6us  | RSRC2      | 65117  | 0.008959298 | 0.04072361  |
| c16k13eqJ56WfJvv48  | KCTD5      | 54442  | 0.008968989 | 0.040759926 |
| 00g6Loa0X10ffPnDdQ  | FAM91A1    | 157769 | 0.00897425  | 0.040776098 |
| B_UOjl.KLrljLutR0   | HINFP      | 25988  | 0.008976742 | 0.040779685 |
| ZCNuyPqvqio4KmLg3A  | TOP1       | 7150   | 0.008982335 | 0.040793143 |
| 6F60lwN9UtWe6J7S0U  | AAR2       | 25980  | 0.00898311  | 0.040793143 |

|                    |          |        |             |             |
|--------------------|----------|--------|-------------|-------------|
| ZiG.UjSVC.HMiHpUpE | LRP8     | 7804   | 0.008986543 | 0.040801    |
| NHpJ4VI71r3NSpKRc  | BCS1L    | 617    | 0.008988426 | 0.040801815 |
| fJfuSf7RYoYrYujiEI | MRPS9    | 64965  | 0.008996954 | 0.040832789 |
| N5CeiV1xWSn4kSTTUk | CDIP1    | 29965  | 0.009000554 | 0.040841387 |
| KilXCek0FUpRnZ39fU | MTA2     | 9219   | 0.009005704 | 0.040857017 |
| WikdWiQLc4KN95CKeU | PKD2L1   | 9033   | 0.009011242 | 0.040874399 |
| QfFAuXvndSu5cWTvIk | NOL12    | 79159  | 0.009019216 | 0.040901862 |
| fX7oznu4Ftu4u6zl40 | SGK1     | 6446   | 0.009020711 | 0.040901862 |
| cV6F0uopuniFB6.lzA | PPP1R15A | 23645  | 0.009030125 | 0.040936799 |
| KvXBQtJdlIKKh7ovPk | RFX3     | 5991   | 0.009036106 | 0.04095616  |
| lvrv31_lf_hw7x7UL0 | PTPRO    | 5800   | 0.009053051 | 0.041025203 |
| ZhwdfHKDgNES7fe.ks | SPOPL    | 339745 | 0.009057426 | 0.041034019 |
| 3NHP_7nWbnMn.qmleU | RFX1     | 5989   | 0.009058423 | 0.041034019 |
| 9XstUn93oLrbP4ko7k | TRPM8    | 79054  | 0.009062465 | 0.04104457  |
| Wf7lN5b9XLnqTUtJXQ | NANOS3   | 342977 | 0.009075922 | 0.041096998 |
| cS.0j7p1KX7v3T8LJE | ST8SIA4  | 7903   | 0.009077473 | 0.041096998 |
| inSCdV6RD9lslna4xQ | DEGS1    | 8560   | 0.009080075 | 0.041097272 |
| B0iRUyDid0C9ApOUgw | RBM43    | 375287 | 0.009081626 | 0.041097272 |
| fe9S7QeU7nefQqoHJc | PPP3R1   | 5534   | 0.00908373  | 0.041097272 |
| 3P4LknPO6zU7s2FO5Q | PKD2     | 5311   | 0.009085613 | 0.041097272 |
| cSA9lColJRXqkuC5R4 | RGL2     | 5863   | 0.009086111 | 0.041097272 |
| rc01S6JosdLgS0dTLk | NA       | NA     | 0.009093034 | 0.041120817 |
| 614QCoRMu.sEW1BPX4 | NR4A2    | 4929   | 0.009099679 | 0.041143101 |
| l4ueL12VJIN9XVLN.k | GNL1     | 2794   | 0.00910278  | 0.041149356 |
| 3pQtInnvnIH6OqF4AI | GBF1     | 8729   | 0.009104718 | 0.041150352 |
| ui8QkUqjncTQqORfS0 | AQP9     | 366    | 0.009113135 | 0.041180625 |
| 0ki1lanvjdHI7K_Cdl | PURB     | 5814   | 0.009115406 | 0.041183116 |
| KltrftWSkelBOMAVTc | NA       | NA     | 0.009119615 | 0.041189833 |
| KrSBbx7g4uCNeihXqU | MKNK2    | 2872   | 0.009121276 | 0.041189833 |
| 3eOOFH3U_u6nVI6Ot8 | TARBP2   | 6895   | 0.009122051 | 0.041189833 |
| 3QnohEvogqjeduieg4 | PCCA     | 5095   | 0.009127201 | 0.041198556 |
| x4Ql0v7u6IBLVJV9JQ | DPH3     | 285381 | 0.009127423 | 0.041198556 |
| K79dQgWQJTboCJ5UHo | RPL32    | 6161   | 0.009136283 | 0.04123078  |
| 0VvHon5eR4x0Tf6XTo | OR4C15   | 81309  | 0.009143537 | 0.041255746 |
| 954L.6Un8v4odfjCfk | FYB      | 2533   | 0.009148466 | 0.04127021  |
| iupBQ0ugSEBeRL6A6A | SUMO4    | 387082 | 0.009151401 | 0.041275677 |
| u6p7fUuCqE1TGy.4io | NA       | NA     | 0.009158434 | 0.041299621 |
| BV93Ae5qwCg4e1_lgU | AGL      | 178    | 0.009161369 | 0.041304796 |
| cPSNOOugiNmJJC4ZaQ | NA       | NA     | 0.00916303  | 0.041304796 |
| NpQtUVN7qwQqrvrf8  | FAM86C2P | 645332 | 0.009177373 | 0.041361666 |
| NxWZ57yEdZT1693WBY | RAB40C   | 57799  | 0.009184849 | 0.041387573 |
| feUL2nQwmQoMTrmcqU | RNASEK   | 440400 | 0.009193377 | 0.04141117  |
| f3qnSnruo5JaWOIAwl | NCLN     | 56926  | 0.009193543 | 0.04141117  |

|                     |            |        |             |             |
|---------------------|------------|--------|-------------|-------------|
| fYAbKhRNAhJ.RL_ah0  | MAX        | 4149   | 0.009195758 | 0.04141336  |
| Hu1Ssk_HVtPouA6NAs  | CALD1      | 800    | 0.009201683 | 0.041432255 |
| frmv4IUyKHlRlrgHrl  | CARS       | 833    | 0.009208938 | 0.041452577 |
| ukuye93cjrt0Q6P3vk  | MOB4       | 25843  | 0.009209658 | 0.041452577 |
| EJRH6KAvkrq_pKiSk4  | RAB11FIP5  | 26056  | 0.00921226  | 0.041453201 |
| 03e0oyS6lr9uUuUnUU  | NA         | NA     | 0.009213257 | 0.041453201 |
| f6tFeFIOBKnPHYje6U  | DPP8       | 54878  | 0.009220346 | 0.041477302 |
| HrUMTq_z.3r0QSRAu0  | STX7       | 8417   | 0.009222228 | 0.041477983 |
| cHWab2qA6eYhXlpeaU  | DIDO1      | 11083  | 0.00922461  | 0.041480904 |
| 0kuu29Fult5MgdJLuU  | PDE4B      | 5142   | 0.009231587 | 0.041503671 |
| WK6ReUMn_0NElUygb   | CD300A     | 11314  | 0.009233138 | 0.041503671 |
| rHosBUX8UVQ8SRWKWM  | TRIM33     | 51592  | 0.009241278 | 0.041511695 |
| fRF7LHfVT9d4R05IOI  | ASF1A      | 25842  | 0.009241278 | 0.041511695 |
| 96sLvRx.148Kje56oE  | CAND1      | 55832  | 0.009243106 | 0.041511695 |
| 61UeXnoCAER1.nyVEs  | KIR3DL1    | 3811   | 0.009244545 | 0.041511695 |
| B2J6WGhV.RevOJYff4  | SFXN5      | 94097  | 0.009244601 | 0.041511695 |
| Ko76fR15JEOelcgJiQ  | NFYA       | 4800   | 0.009245321 | 0.041511695 |
| NVFNFOBUNFV13s57RE  | P2RY13     | 53829  | 0.009248588 | 0.041518583 |
| 0ECqTqXUl.IRC5dLIQ  | SH3BP1     | 23616  | 0.009253295 | 0.041526235 |
| WpRL2oIGjhXoR0JQLw  | PUSL1      | 126789 | 0.009256119 | 0.041526235 |
| xoaLvFbgVI0Ug8LIYE  | ARRDC5     | 645432 | 0.009256175 | 0.041526235 |
| 37lf6oODH.vTtyVHqA  | NAPEPLD    | 222236 | 0.009257227 | 0.041526235 |
| xq0V4Ug4Eqc8fKN7pQ  | DPP8       | 54878  | 0.00925911  | 0.041526905 |
| o7SWQwEgllJXerpXSs  | LRCH4      | 4034   | 0.009262875 | 0.041536017 |
| 0CaOkkeCBCVSvUvUq0  | PINX1      | 54984  | 0.009270517 | 0.041562504 |
| IV13egVePXnrnv83VQ  | NA         | NA     | 0.009277882 | 0.041587741 |
| ECBlI_SlhWSKlepdcI  | SPTB       | 6710   | 0.009280208 | 0.041590384 |
| ukiBBnlKaKKCIhBgig  | NA         | NA     | 0.009290342 | 0.041628012 |
| rrblSOOiA2FSCXiiu0  | C16orf74   | 404550 | 0.009295548 | 0.041643547 |
| 6h00wO655z2EBS.ySo  | EED        | 8726   | 0.009299092 | 0.041651635 |
| BV1XkXL77de7nm38E0  | NA         | NA     | 0.009304796 | 0.041669391 |
| oOmVVJa6z9DQhLI5lg  | HAUS8      | 93323  | 0.009320301 | 0.041707779 |
| uSOeO.sK1rqIQKCKI   | KCNJ15     | 3772   | 0.009320744 | 0.041707779 |
| uF6b0oI9ylkkrVorc   | C1orf213   | 148898 | 0.009320966 | 0.041707779 |
| Tpli659UI0Q7qD_Eyg  | OPA1       | 4976   | 0.009321852 | 0.041707779 |
| iW6ikXuEeV.17knv.c  | DLGAP1-AS1 | 649446 | 0.009322073 | 0.041707779 |
| o4VUSopKAElIJRfhH8  | DHRS3      | 9249   | 0.009352309 | 0.041825072 |
| 04qkX6fWXucn_U7Teg  | CHFR       | 55743  | 0.00935242  | 0.041825072 |
| upWX307QohTkj44igk  | SLU7       | 10569  | 0.009353528 | 0.041825072 |
| IjnoUXQnkdc5RdTWwo  | IDH3G      | 3421   | 0.009358345 | 0.041833226 |
| EHYVUjIjXnoFsCqKRXg | LSP1       | 4046   | 0.009358844 | 0.041833226 |
| TN.KP1D9Ql46jdUnoE  | ZNF655     | 79027  | 0.009363385 | 0.041845715 |
| WpB3oTd5c80ueqEVe   | ZNF276     | 92822  | 0.00937075  | 0.041854325 |

|                    |            |        |             |             |
|--------------------|------------|--------|-------------|-------------|
| QuPe7pf.qnoA7OD30E | CPOX       | 1371   | 0.009371857 | 0.041854325 |
| xodSVMJHu1XfTItDtw | PARP4      | 143    | 0.009371913 | 0.041854325 |
| Zpx2op4pJINH4BaCkg | TMEM106A   | 113277 | 0.0093723   | 0.041854325 |
| o5XiRXO6Dhxl1J01lc | SETD3      | 84193  | 0.009374183 | 0.041854931 |
| NgtNuUVIF4ual3SJ18 | UBE2I      | 7329   | 0.009382434 | 0.041883965 |
| B90heQEXCRepQECcQY | SGTB       | 54557  | 0.009407908 | 0.041989855 |
| 6S13FNeR7iSRzF7m_0 | WASL       | 8976   | 0.009414664 | 0.042010533 |
| Tspt5PV77vXn3X0snk | ARHGAP32   | 9743   | 0.009416048 | 0.042010533 |
| fU6KhUypyEf4pCSinc | MESP1      | 55897  | 0.009431277 | 0.042070641 |
| ujp7aiezRer3tV6d7M | ST6GALNAC6 | 30815  | 0.009436427 | 0.042085777 |
| rjEHulOHigKJ0ZUiHo | IGFBP3     | 3486   | 0.009451434 | 0.042144861 |
| 6fPW7u.qL5_q_qtuqE | CAPZB      | 832    | 0.009462565 | 0.042185554 |
| WUR3Y971PrezNzfotl | PCSK6      | 5046   | 0.009464393 | 0.042185554 |
| 3SDXYNXJJS1ecfa_XY | ZNF688     | 146542 | 0.009467604 | 0.042185554 |
| TCLp5CqeuC9SihVhuc | NA         | NA     | 0.009467604 | 0.042185554 |
| HW7u2kueu37b9Zic8c | CRSP8P     | 441089 | 0.009475745 | 0.042213974 |
| irtPvV.eDyexMwl9f4 | RMI1       | 80010  | 0.00948455  | 0.042245343 |
| oVdvX6iOOL.gzkhBf4 | FBXW11     | 23291  | 0.009495736 | 0.042287304 |
| rd9ZhD0zfsbTSl.Tlo | ZNF83      | 55769  | 0.009500166 | 0.042299169 |
| EeepIalZliVlqLitVk | C4orf48    | 401115 | 0.009509913 | 0.042334696 |
| HVQfZXIR_HOUDV9eiE | ID3        | 3399   | 0.009517998 | 0.042362815 |
| 3TXADqtSkhV1IXRHlg | RASA3      | 22821  | 0.009524754 | 0.04238034  |
| fcYv5_tIJSjNOVe6Q  | SF3B1      | 23451  | 0.009525473 | 0.04238034  |
| Ql4eUJTqyXq7AF6l64 | DDB1       | 1642   | 0.009527578 | 0.042381831 |
| Bg.QKDPCCAbl59V9l8 | NA         | NA     | 0.009532783 | 0.042393203 |
| lo.rw4fOJCev6UhLMU | HIGD1A     | 25994  | 0.009534721 | 0.042393203 |
| 0xmuhxiF_GaW93oZac | MRPS34     | 65993  | 0.009537047 | 0.042393203 |
| WqOfok7txh9iMOh96U | OAT        | 4942   | 0.009537213 | 0.042393203 |
| 9udTIEPOu6odIK4UKU | ZNF484     | 83744  | 0.009546849 | 0.042427676 |
| EXhErunHoqI9MXmlUA | TMEM129    | 92305  | 0.009548953 | 0.042427676 |
| KqulXhJCEHpJ0xX.Sc | FAM179A    | 165186 | 0.009550282 | 0.042427676 |
| 6vSOEmFl.09VWUXsdE | TBL1X      | 6907   | 0.009556042 | 0.042436786 |
| T6pdPBX8iEJ.lUp5oU | DUSP14     | 11072  | 0.009556374 | 0.042436786 |
| Qe1516jkenHV8tx1fU | CYTH4      | 27128  | 0.009557648 | 0.042436786 |
| ZTIIEUUVI7R8bQgrWg | SLC4A2     | 6522   | 0.009565954 | 0.042465796 |
| 6UilM9AEq33S7OQqnk | BACH2      | 60468  | 0.00956972  | 0.042474641 |
| ThFO0V0Uodt3U9W0i8 | ARL3       | 403    | 0.009574538 | 0.042488152 |
| IXuUO5yJ4VgUBKhT8Y | TRUB1      | 142940 | 0.009580297 | 0.042505835 |
| lr1E6KU63F30V7326Y | TMEM8C     | 389827 | 0.009585502 | 0.042521055 |
| 6J41loFSJQfUF0Vzo  | GJA4       | 2701   | 0.009592092 | 0.042542409 |
| opepzl1OuNv9x5BFxw | SLC6A10P   | 386757 | 0.009595359 | 0.042549022 |
| rcdqleKSgDR_B2oplG | NA         | NA     | 0.009603832 | 0.042578711 |
| xupWoEp4p4rpdfgbqM | NA         | NA     | 0.009619005 | 0.04263809  |

|                    |          |        |             |             |
|--------------------|----------|--------|-------------|-------------|
| rdQRbUvukndSCwySeE | RTTN     | 25914  | 0.00963357  | 0.042694748 |
| TiFeHcYA8AvJWu66Zk | NXNL1    | 115861 | 0.009643039 | 0.042723852 |
| Eog14Ala59BSfkyRlg | PNPLA8   | 50640  | 0.009643704 | 0.042723852 |
| KUiX5B0C7re6FJJpLg | LRRC20   | 55222  | 0.009647469 | 0.042730372 |
| TXCeLuFUglGO53s1IE | CKS1B    | 1163   | 0.009648743 | 0.042730372 |
| 9R7Dp5xljoU3000Uus | ANKRD17  | 26057  | 0.009656939 | 0.042758763 |
| NUz1KJIWy15K7hqSfY | TMEM191A | 84222  | 0.009666663 | 0.042793762 |
| E5ejmiqnrli5WlpeSg | NA       | NA     | 0.009670838 | 0.042804483 |
| 3iCOjAN11rpACi1KTg | THOC2    | 57187  | 0.009682966 | 0.042850244 |
| TQnk7XhXf4PC6Huk4Q | SNX2     | 6643   | 0.00969083  | 0.042870183 |
| QKj8ld5XCuU_AKhKFc | AGAP3    | 116988 | 0.009691051 | 0.042870183 |
| itu9q.9d7h6lt_u3bo | WDR18    | 57418  | 0.009706391 | 0.042919651 |
| 9.qXp7q7rfdTjh7reU | SLC26A10 | 65012  | 0.009707221 | 0.042919651 |
| 9X1L7fgSXh16SVzoL0 | NBPF9    | 400818 | 0.009707609 | 0.042919651 |
| Q69cXogn_KCpSiVfaE | PSTPIP1  | 9051   | 0.009725385 | 0.042980321 |
| fNVuBRdMip1SC7unic | SCGB3A1  | 92304  | 0.009725606 | 0.042980321 |
| ZVKQ57Z5_IExEUJUn0 | PIK3R6   | 146850 | 0.009726714 | 0.042980321 |
| 9k3mzbqMPhOKn4iB1I | CD177    | 57126  | 0.009730203 | 0.042987807 |
| 60VRepUIKJVI6U0s.M | NA       | NA     | 0.009750692 | 0.043062445 |
| HkD7UFRVdBOKp9T.e4 | AHNAK    | 79026  | 0.009768856 | 0.043134709 |
| 0qdJKZG_v3621.i4Qc | DGKG     | 1608   | 0.009803743 | 0.043250606 |
| BkwwK0nVIRf5RNV0Sc | ULK4     | 54986  | 0.009804131 | 0.043250606 |
| 3peql77.Tnn1FNEeq8 | COLQ     | 8292   | 0.009807565 | 0.043257786 |
| iScVoKeKSid5uBSkoA | NA       | NA     | 0.009824399 | 0.043324061 |
| N0JVwhLIZjACFCV4E  | NA       | NA     | 0.009829328 | 0.043337816 |
| cKeegpJ_6KW_vWVHT0 | EZR      | 7430   | 0.009836859 | 0.043363041 |
| r6UvkrwlUgC9F_iCdY | SNRPD3   | 6634   | 0.009848488 | 0.043389201 |
| 6Lr1K1JXh9NdX3e1EU | SGCA     | 6442   | 0.009850039 | 0.043389201 |
| chV1JJevRREB3l6FU8 | MAPRE3   | 22924  | 0.009852309 | 0.043391223 |
| uVQdC7RdfVSdVSkGMs | THRA     | 7067   | 0.009855466 | 0.043397146 |
| uEkIk7u5R9VxVBuAF0 | RASSF7   | 8045   | 0.009857847 | 0.043399653 |
| NnBNT1f0xRT.RXv31U | WBP11    | 51729  | 0.009865434 | 0.043425073 |
| KniigXqk.KkihAKO0k | DOK2     | 9046   | 0.009870196 | 0.04343373  |
| TG51d5SiiDghuuYjmc | NSUN5    | 55695  | 0.009877395 | 0.043453769 |
| 935NLGUCU31KFSKp5c | ABHD1    | 84696  | 0.00991112  | 0.043570127 |
| uqeFdeSfoX_H3hXdNc | HCST     | 10870  | 0.009914996 | 0.043571176 |
| fSb9FeYjpBaHPpFrcs | TUFM     | 7284   | 0.009934046 | 0.043633899 |
| Bg7qHeN9Vd9K7S5oik | HIF3A    | 64344  | 0.009937867 | 0.043633899 |
| xpz3yMxC_8pSuQ6dkU | METTL8   | 79828  | 0.009938421 | 0.043633899 |
| rSSodV.V8qTHHtLSB4 | ARHGAP20 | 57569  | 0.00994202  | 0.043633899 |
| uWg4gnAgr7in5Wr2IO | POLR1C   | 9533   | 0.009948167 | 0.043652879 |
| 9UoreqxS6nSOCd_504 | FANCE    | 2178   | 0.009963894 | 0.043705877 |
| K6dxX6gl41a7ulSfvQ | SCAMP5   | 192683 | 0.009981836 | 0.043753503 |

|                    |           |        |             |             |
|--------------------|-----------|--------|-------------|-------------|
| 3IF65fLX6nqoqpUV8A | DUSP15    | 128853 | 0.009999003 | 0.04381101  |
| u5fXW biBW7IX1RTM  | SEMA4B    | 10509  | 0.010010245 | 0.043844961 |
| 35Hnk9SUq4SLiFO.QE | RAD51     | 5888   | 0.010014564 | 0.043847845 |
| cYoj.9OFFaDSVOldL8 | PTPRA     | 5786   | 0.010025806 | 0.04388369  |
| rCCa.X6ifeXW6l3SVk | CLIP2     | 7461   | 0.010029073 | 0.043887305 |
| lokghwlgYonhSjeYYU | TACC3     | 10460  | 0.010047015 | 0.043941738 |
| ZdTpXaWfkVnd77Ef0M | NA        | NA     | 0.010051058 | 0.043944552 |
| ocMV36ACJ_VddSRHIk | VAC14     | 55697  | 0.010063628 | 0.043982276 |
| NepEiUO9tPkndJAerQ | HS1BP3    | 64342  | 0.010103998 | 0.044118463 |
| xeeuSudt5.OV9RN79k | GPR18     | 2841   | 0.010111474 | 0.044137675 |
| BXltCum3x2o.ee 6U  | DHRS4     | 10901  | 0.010112083 | 0.044137675 |
| oIHl55IgBEdf58IRCs | KIR3DL2   | 3812   | 0.010120999 | 0.044160497 |
| WnVdKd59uFbhU4VEuc | OGFR      | 11054  | 0.010129749 | 0.044190624 |
| 0KVgl1U009lvF5SOok | POLR2F    | 5435   | 0.010162919 | 0.044317158 |
| KhJXu_50odHeeeugHQ | KDSR      | 2531   | 0.010164304 | 0.044317158 |
| 3TB3J5Vv37ggMgxWIE | ASIC5     | 51802  | 0.010188393 | 0.044406023 |
| WsvHP7u66SCBHwicd0 | FSIP2     | 401024 | 0.010242552 | 0.044578823 |
| HpR6SqZtKGeei7puaU | METRNL    | 284207 | 0.010244822 | 0.044578823 |
| QzCM8CrC3daVr9Xa7k | NA        | NA     | 0.01024665  | 0.044578823 |
| W_UCU5IEGUJWJICKmE | ADRM1     | 11047  | 0.010255953 | 0.044611196 |
| x.WBQKeer_TvxldVeo | SMARCD2   | 6603   | 0.010272566 | 0.044675347 |
| 9pVq79QbToJJ4R94B0 | NLGN4X    | 57502  | 0.010295271 | 0.044763856 |
| xpEPRgkiggMqFkkqFk | ZRSR2     | 8233   | 0.010296655 | 0.044763856 |
| iDpilE0SCqjKihCiQ  | HDGFRP2   | 84717  | 0.010321963 | 0.044833194 |
| cpJjgJ_8o7XuefuOIk | TKTL1     | 8277   | 0.010329328 | 0.044857051 |
| xAVICc5yNVUJUtitXo | RNF25     | 64320  | 0.010344113 | 0.044880578 |
| N6vUArVK7XdbktoAJU | MUTYH     | 4595   | 0.01034954  | 0.044895992 |
| lc4m5luiogTWokkgs  | BCR       | 613    | 0.01035469  | 0.04490207  |
| uSd0oCVSdEkhKBDhHk | FAM71F2   | 346653 | 0.01035469  | 0.04490207  |
| fLW.liQFM_5d9N_FSk | ASXL2     | 55252  | 0.010356961 | 0.044903787 |
| c0hT._avdUSReBUkEk | CCNB1IP1  | 57820  | 0.010377229 | 0.044979701 |
| onSrqlqVanle0ddwR8 | SEPN1     | 57190  | 0.010381327 | 0.044985002 |
| N5qUSkq0j4ggkCeqCQ | XPO5      | 57510  | 0.010385757 | 0.04499606  |
| NpIglSrqO8ipMsKtlo | LOC286135 | 286135 | 0.010399491 | 0.045047412 |
| THlgk2JxKlq659Yfll | RNF113A   | 7737   | 0.010401706 | 0.045048861 |
| xoFKLoVxWJ7ezw1U1U | MAVS      | 57506  | 0.010414608 | 0.045096589 |
| igd0Ur6ZeDI8d0ktlo | ADIPOR2   | 79602  | 0.010429782 | 0.04514597  |
| 9neOiSgOOiKdAkiid8 | DYDC1     | 143241 | 0.010445011 | 0.04520372  |
| 3goAblwR_6V6Tdev4E | ALMS1     | 7840   | 0.010453317 | 0.045231497 |
| f1LqV2uXnuB5.V2g78 | GTPBP6    | 8225   | 0.01047436  | 0.045301117 |
| B1WFB5JFQoekG6_if8 | NA        | NA     | 0.01047508  | 0.045301117 |
| 9ZOgCDgjlNmI5FoVlk | NA        | NA     | 0.010501218 | 0.045397763 |
| ud1JXt0FMdQPLIBUqk | C12orf52  | 84934  | 0.0105036   | 0.045399864 |



|                     |            |        |             |             |
|---------------------|------------|--------|-------------|-------------|
| WQpXfRHU37JVJKJz.c  | NA         | NA     | 0.010515727 | 0.045435886 |
| rtGiDc3DVHs8lqgFqU  | MED18      | 54797  | 0.010525418 | 0.045469557 |
| Bnl1Unc1QXdUHMActrk | SERPINH1   | 871    | 0.01053594  | 0.045506803 |
| xltJipWKpKT1qlOnZU  | NA         | NA     | 0.010548012 | 0.045550732 |
| x6d5nFc6U6I0EKIEK4  | NA         | NA     | 0.010558423 | 0.045579257 |
| ZUd3oKleKp.sATy0vk  | LAMP3      | 27074  | 0.010561247 | 0.045583234 |
| WVlllpCpNR1DIRcse4  | SPATA16    | 83893  | 0.010580131 | 0.045635193 |
| IUMI16RSUhdFfhQXdo  | FBXW4      | 6468   | 0.010580906 | 0.045635193 |
| r5QilEuggHmioCeoGI  | NDUFB9     | 4715   | 0.010591926 | 0.045674499 |
| oE75npwekgUZNXGvvg  | EIF2B4     | 8890   | 0.010595249 | 0.045680603 |
| otOuuTt5AVJx2op4JI  | GPR1       | 2825   | 0.010621276 | 0.045768582 |
| TCAF0KHml33DXRT10o  | GNAT2      | 2780   | 0.010621387 | 0.045768582 |
| 6Kp7C5QTh7gqUi4IV4  | SLC3A2     | 6520   | 0.010637889 | 0.045831448 |
| xenyOVJ7p6sS73qWgg  | C1orf127   | 148345 | 0.010657105 | 0.04590598  |
| unonucp4qD1EeD.EJo  | ICK        | 22858  | 0.010678259 | 0.045988832 |
| opdtZK3TVEd_IJfrRw  | LCMT1      | 51451  | 0.01068579  | 0.045999795 |
| up3zolei pCjntP.4   | STIM1      | 6786   | 0.010686566 | 0.045999795 |
| E3noeO33kr5I14U6nk  | C11orf44   | 283171 | 0.010699191 | 0.046021064 |
| QVepzTeTqnqtde5z_w  | NA         | NA     | 0.010712371 | 0.046069483 |
| cdU6bv6M3nl7rSgX5E  | ATPAF2     | 91647  | 0.010717189 | 0.046081929 |
| rVSKASr84keEjt9XqQ  | TMEM241    | 85019  | 0.010722505 | 0.046087113 |
| 93QBU6KinnrusplFyk  | TAPBP      | 6892   | 0.010726492 | 0.04608884  |
| WQjCT9.Xi9K4eKCJRA  | HNRNPUL1   | 11100  | 0.010740835 | 0.04614219  |
| iKBpXy3Qqck1eKJSlo  | MAPK3      | 5595   | 0.010750803 | 0.046173446 |
| 0mV7gXjqBd3uEV1u98  | CDK5RAP3   | 80279  | 0.010751966 | 0.046173446 |
| BcMd7kLr.kqTKmOqCU  | NA         | NA     | 0.010758224 | 0.046182139 |
| clA5KXu7J7u..e6_WQ  | ESYT2      | 57488  | 0.010759774 | 0.046182139 |
| cq3llSjosQ67jfp3_Q  | HINFP      | 25988  | 0.010768302 | 0.04620765  |
| 9onCSXyMkkgp. _j3XU | ANXA2R     | 389289 | 0.010769576 | 0.04620765  |
| Q1QkESFHfvflXVUioc  | ARFGAP2    | 84364  | 0.010793831 | 0.046295135 |
| Q.DSReOH6Sh_VRSrek  | COQ7       | 10229  | 0.010802193 | 0.046322705 |
| xpTRqDotTnlCJ0u_p4  | KIAA1967   | 57805  | 0.010810555 | 0.046350266 |
| EVRRxdtTr70.KOfcPSU | ZNF329     | 79673  | 0.010823735 | 0.046398469 |
| 3Cnro7Ll.Xced3Seqk  | SLC22A18AS | 5003   | 0.010829162 | 0.046413427 |
| BgKUIFL0okfqLjcrjk  | ATXN3      | 4287   | 0.010841788 | 0.04645092  |
| KEUyE4nKgp4ooSiCpU  | SIPA1L1    | 26037  | 0.010845387 | 0.046458032 |
| 0oa9ic4DvihFxG496I  | SHANK2     | 22941  | 0.010850316 | 0.046470834 |
| oU3npF4oi4kl6FEJUs  | MED24      | 9862   | 0.010858235 | 0.046479819 |
| ulIT2S.UUgO.9fO_II  | SNORD14A   | 26822  | 0.010861889 | 0.046487157 |
| xQLLVZdWEo36KaWmHk  | NA         | NA     | 0.010878669 | 0.046526903 |
| ZSYR6MCbruldN7lehw  | DNAH1      | 25981  | 0.010878946 | 0.046526903 |
| 9eh8FGDFfi7UD6goH4  | AQR        | 9716   | 0.010903644 | 0.046603955 |
| uUeSetUIXkiNSGfv.w  | LFNG       | 3955   | 0.010923912 | 0.04665258  |

|                     |          |        |             |             |
|---------------------|----------|--------|-------------|-------------|
| oQ5LAlIAh551dltHvs  | DIDO1    | 11083  | 0.010933049 | 0.046683279 |
| 3VDX_kpOSdRKY.fQkk  | RAB37    | 326624 | 0.010953926 | 0.046755754 |
| KJLSIERT51QDofd5CU  | APOBEC3F | 200316 | 0.010970096 | 0.04678451  |
| NGeemdOpXrv5Fkf7DQ  | GAK      | 2580   | 0.010970429 | 0.04678451  |
| 9qdNEKEfUn7khFFeU8  | TMEM177  | 80775  | 0.010985491 | 0.046823738 |
| Q.qKWkamjSFNenBGua  | KCNH6    | 81033  | 0.010996179 | 0.046860955 |
| ue1ESvt17t9t9nm7h8  | NA       | NA     | 0.011035774 | 0.046983314 |
| Kbi2l5Tv1O5T98Vfso  | LOC81691 | 81691  | 0.01103666  | 0.046983314 |
| loOghU3N391AVCACA0  | NOP56    | 10528  | 0.011051058 | 0.047030013 |
| EUlcJSV53lwux1IIB0  | AGXT2L2  | 85007  | 0.011051556 | 0.047030013 |
| KQlEgFSTtXtEN06kX4  | COQ9     | 57017  | 0.01106601  | 0.04707715  |
| cfcaYCXIFUQ4NRXnUc  | TBKBP1   | 9755   | 0.011066563 | 0.04707715  |
| Qoio5_Ek5w_CUiQs7U  | NA       | NA     | 0.01108146  | 0.047132149 |
| cv7uR9WExe7fbuXI9U  | SSU72    | 29101  | 0.011088825 | 0.047155102 |
| TeSFNFLiBU_oWJeqJM  | HERC2P8  | 440366 | 0.011093034 | 0.047164627 |
| uGAZTct4NUm2qd7lJ8  | RRAGC    | 64121  | 0.011111585 | 0.047218359 |
| ESS6iFiupl0fi9CFJc  | FAM200A  | 221786 | 0.011111585 | 0.047218359 |
| fRLVFTe6sEKq73.SX4  | FAM86HP  | 729375 | 0.011131521 | 0.047294685 |
| oJRRKZRK1RbZIVSj3g  | LCE1D    | 353134 | 0.011146583 | 0.047350284 |
| Z4oku6qhlSiu_j_iFgg | AZGP1    | 563    | 0.011149407 | 0.047353883 |
| c0UHodU3uuDOLV_VUE  | NA       | NA     | 0.011157603 | 0.047374245 |
| N53hTiuqv_q6m_Xq98  | ARNT     | 405    | 0.011158157 | 0.047374245 |
| Hn1BHH0q6S7_qR6mJc  | CCDC94   | 55702  | 0.011162144 | 0.04737438  |
| QK3XOrl6gtfgLoe90o  | FHL3     | 2275   | 0.011175158 | 0.04742121  |
| WKRWhXqTp4oo4loOP4  | MTX1     | 4580   | 0.011208661 | 0.04753017  |
| BXuAgwUeR1BepBOkiU  | EVI5     | 7813   | 0.011211098 | 0.047531618 |
| Zx0qinikqIPn4F_img  | NA       | NA     | 0.011233359 | 0.047607635 |
| Kz0go7VugDuleKOW3U  | CRELD2   | 79174  | 0.011239506 | 0.047607635 |
| lO4DeVqRF05ew1SR3o  | GCLM     | 2730   | 0.011241943 | 0.047607635 |
| rplgopQglBTQglXQ5c  | TCF7     | 6932   | 0.01124222  | 0.047607635 |
| fqLqHibWSK4WAJbOOM  | TCF25    | 22980  | 0.011242939 | 0.047607635 |
| BEUotBAe6U_lAzpdUE  | ZNF175   | 7728   | 0.011253018 | 0.047633472 |
| QroP5K0lSg_kigsrt4  | ZNF263   | 10127  | 0.011261214 | 0.047659742 |
| uhfm7oilPYeiCteevo  | MRPL21   | 219927 | 0.01126354  | 0.047661165 |
| 0cVOsh0SeXuuB.p1eU  | PRRC2A   | 7916   | 0.011282146 | 0.047731467 |
| lv_i0A1OvUpqrnsqkk  | NA       | NA     | 0.011301584 | 0.04778838  |
| K9eVxdccEfXlU.oVsU  | TRIOBP   | 11078  | 0.011309281 | 0.047804052 |
| 0lKU5Kg5S1gEeotQLc  | MTA3     | 57504  | 0.01133841  | 0.047901818 |
| Wve5VfciXA.vlyvXWo  | CHAT     | 1103   | 0.011349208 | 0.047938984 |
| K0rlfOAKfjlqL_17pU  | ZNF337   | 26152  | 0.011353638 | 0.047949242 |
| BesiCOkSjoplUlaEuw  | E4F1     | 1877   | 0.011388194 | 0.048067828 |
| NPkeDtGtX_V0HVJJU   | SCARNA5  | 677775 | 0.011392901 | 0.048068652 |
| 9XV5cXIN5eAqeiKpLM  | WBP1     | 23559  | 0.01141339  | 0.048125227 |

|                     |         |        |             |             |
|---------------------|---------|--------|-------------|-------------|
| QpKIH3UhF0jAtaJUKc  | PCBP2   | 5094   | 0.011422084 | 0.04815341  |
| xRRVUd7l4X4ot_7k_c  | MSN     | 4478   | 0.01143028  | 0.048179483 |
| Wieo4TfReOUQellf_k  | ZNF148  | 7707   | 0.011449939 | 0.048236883 |
| uYHfegrR0oEV1eXuQl  | SUSD2   | 56241  | 0.011456972 | 0.048258024 |
| 36pJL6oLt54gzQqggk  | LILRA4  | 23547  | 0.011486045 | 0.048343707 |
| xHXShE7qULliZaVdCg  | FAM207A | 85395  | 0.011503932 | 0.048396254 |
| T0iv0uJQjZFHndSXpg  | LILRB1  | 10859  | 0.011516945 | 0.048416989 |
| fm9fWTX5UXRKRYvTkl  | PDLIM7  | 9260   | 0.011528741 | 0.048451432 |
| NX1FaEZkJY5EiLun08  | NA      | NA     | 0.011534112 | 0.048463642 |
| xjfQJ55qT3O1X17SNI  | ALG9    | 79796  | 0.011537435 | 0.048469101 |
| Z7jIRTKoT1Kn5HqRJA  | FRG2    | 448831 | 0.011541367 | 0.048477117 |
| Z6O_EIF6Vln6WAKSCE  | C1orf86 | 199990 | 0.011554214 | 0.048506029 |
| xlcGDM_qooMiqK7koE  | APOL3   | 80833  | 0.011558478 | 0.048512738 |
| QxN.x7irieRqCWNYqk  | NA      | NA     | 0.011563518 | 0.048519111 |
| BWeXuR04Aqf6fwqCSc  | PPIE    | 10450  | 0.011584339 | 0.048589455 |
| uNHtlZUtlXSWfvdlOg  | PTPRA   | 5786   | 0.011591151 | 0.048609513 |
| Qv7AYbv4knpu4p5Wno  | ABCF2   | 10061  | 0.011621996 | 0.048720942 |
| Ev9E_nvELmKLup553U  | TRIP6   | 7205   | 0.011623823 | 0.048720942 |
| fiCeKcvUAF3XhV5e_k  | ITGA3   | 3675   | 0.011661147 | 0.048860286 |
| 92oolIroruvuuiJFJw  | CCDC134 | 79879  | 0.011675102 | 0.048910203 |
| 9WutZd0oSK5BP6i.OQ  | DIO1    | 1733   | 0.011704674 | 0.048991246 |
| fV51RIESQ9dKcJ5a98  | PECAM1  | 5175   | 0.011724    | 0.049063567 |
| BGzdU5lC6JVSUIJSUQ  | EEF1D   | 1936   | 0.011735574 | 0.049103419 |
| KVUgAPJ6m66YFXMPUk  | NA      | NA     | 0.011737623 | 0.049103419 |
| QigSITgqJXiSLT00gg  | OR1E1   | 8387   | 0.011742773 | 0.049116387 |
| rlJekS6dE3kPUiHQck  | NA      | NA     | 0.011753018 | 0.049150655 |
| 0qKeK6kzReK0kvAhSU  | NDUFAF7 | 55471  | 0.011766309 | 0.049180477 |
| l0F0Uqe3frURdnV7y4  | SURF4   | 6836   | 0.011768634 | 0.049181617 |
| ZN6rJtT5e9dObmJbo4  | SIVA1   | 10572  | 0.011774947 | 0.049199416 |
| u4fe4vyF5V1RVRXlHM  | NIT1    | 4817   | 0.011785857 | 0.04923641  |
| Qpc2sX7gp.W5E2rRS4  | C7orf55 | 154791 | 0.011793111 | 0.049258126 |
| o84N1EXhXoa3lV3WH0  | PPP1R35 | 221908 | 0.011800864 | 0.049281915 |
| rNn4F6ikqvkuJ4hrtE  | INIP    | 58493  | 0.011821575 | 0.0493426   |
| Kh1KJOkcVSgSLSTUAAU | PYHIN1  | 149628 | 0.011825008 | 0.049348332 |
| EqOhegEJF1UBE0UdXI  | CYFIP2  | 26999  | 0.01183697  | 0.049389645 |
| WV5XUSD6vUKnvUhb5Q  | GNAI2   | 2771   | 0.011845166 | 0.049407785 |
| WgA1K5aKJIKOIDHolo  | DBP     | 1628   | 0.011845442 | 0.049407785 |
| Bedc5CoXE9dLEZe5dY  | RBMS3   | 27303  | 0.011858678 | 0.049454378 |
| ZO1Xn4FelP6yIOIEM   | APOL2   | 23780  | 0.01186715  | 0.049481098 |
| rjiDPnpXn9XrKz_UpU  | TCEAL3  | 85012  | 0.011869476 | 0.049482182 |
| ZlI600y0a67a757V70  | ICAM2   | 3384   | 0.011876675 | 0.04949589  |
| KKecgF6gRVJEq3SBlg  | NA      | NA     | 0.011876897 | 0.04949589  |
| BVCReghOUjU7ksOXro  | RPL28   | 6158   | 0.011883099 | 0.049498672 |

|                    |           |        |             |             |
|--------------------|-----------|--------|-------------|-------------|
| OnEpSgUiVNN0ilXo7U | ZDHHC11   | 79844  | 0.011883597 | 0.049498672 |
| ZpO5egcWLKJT9.sVeU | CCNY      | 219771 | 0.011883763 | 0.049498672 |
| xeJUooRVExbUlzceiA | FLAD1     | 80308  | 0.011898217 | 0.049550258 |
| QV15Xe1PflkxfTUdTk | FAM222B   | 55731  | 0.011928453 | 0.049665133 |
| WGA4iUXD4.WotZFKpU | GGT7      | 2686   | 0.011936261 | 0.04966552  |
| rkK0J4ohwvJTupLgk4 | RNF135    | 84282  | 0.011941245 | 0.049669003 |
| NXXsGHoJFKclF4Vdoc | TRABD2A   | 129293 | 0.011962122 | 0.049744784 |
| KblNiOibpB9ooJ9kr0 | HNRNPM    | 4670   | 0.011975523 | 0.049777009 |
| B5PoQdRV9fpfIXZcQ  | ZDHHC24   | 254359 | 0.011978624 | 0.049781261 |
| 6XoAOjApiRbSiZljaU | EWSR1     | 2130   | 0.011984827 | 0.049798397 |
| ISLuXQ5TqFXXeveOdU | NA        | NA     | 0.011989977 | 0.049811156 |
| xXp1ae5nin_1Xtf6Yl | FAM101B   | 359845 | 0.011994075 | 0.04981954  |
| TeKyWJd0IXEI6rHBFE | WASH2P    | 375260 | 0.012023258 | 0.049932102 |
| HKXUQKXpISK3T1JeHc | CCDC24    | 149473 | 0.012033282 | 0.049955335 |
| QEZVcR5WUU.5EeXvRM | EVI5L     | 115704 | 0.012035109 | 0.049955335 |
| 0jOJ3JZUJyQ6QV96tU | UBA52     | 7311   | 0.01203738  | 0.049956103 |
| W6nUq1JUQnk0p3eoig | AGPAT2    | 10555  | 0.012041976 | 0.049966521 |
| 6ceCiQjaQlURbV_Qpg | NA        | NA     | 0.012066951 | 0.050044146 |
| ZJN1JRen_eu6XZJflA | LOC389791 | 389791 | 0.012069443 | 0.050045315 |
| 385O6Qm8fXuRsIJXq0 | OPRL1     | 4987   | 0.01207559  | 0.050045315 |
| c5dMI5617CQkcJ1EuU | APOBEC3H  | 164668 | 0.012094806 | 0.050107614 |
| 6xBI2p1iR5xhNxadxQ | DPP7      | 29952  | 0.012105161 | 0.050141844 |
| ltLUV5VtR.VN12swNM | TOMM40    | 10452  | 0.012116624 | 0.050174038 |
| c6CV0UJH1KHHsKWZtQ | XRCC6     | 2547   | 0.012147026 | 0.050258118 |
| HBFFIFF1RNxivph7cQ | ATP13A2   | 23400  | 0.012148411 | 0.050258118 |
| Krv9NNp7fg1.cQourE | TM4SF19   | 116211 | 0.012150017 | 0.050258118 |
| x.7HIVZ08BJdVSV4uQ | SF3A2     | 8175   | 0.012184129 | 0.050363526 |
| f21noCeCHtl51g.W00 | LAGE3     | 8270   | 0.012190165 | 0.050369261 |
| xnq.JWKet8jkmHv0i4 | NA        | NA     | 0.012191605 | 0.050369261 |
| 6wCOFm_ClF196eoqkg | ARRB1     | 408    | 0.012197032 | 0.050379567 |
| Bl6R0eke2PVROF.Q1c | NA        | NA     | 0.01221514  | 0.050440398 |
| iROBEhGSogpJbuCi2g | COMMD5    | 28991  | 0.012229095 | 0.050480619 |
| 6C96ScAjhZvgpRdfek | ARRB1     | 408    | 0.012245874 | 0.050541173 |
| HV6V90v91RPRV5UiPU | NA        | NA     | 0.012298649 | 0.05073276  |
| xnUtigosYkonS44fk4 | MRPL55    | 128308 | 0.01230618  | 0.050738528 |
| ZgWnZRxeVrCp5UICTw | MIDN      | 90007  | 0.012332927 | 0.050839142 |
| KogiQq9XQiguJrntdl | PTPN6     | 5777   | 0.012336194 | 0.05084386  |
| QJUo3p.llr5BO_igVo | ABCB9     | 23457  | 0.012343726 | 0.050848654 |
| 6lG3pe7X6ktEcXd4.4 | KCNK6     | 9424   | 0.012355632 | 0.0508802   |
| oB.usjxziFJJd51Suk | CCL4L2    | 388372 | 0.012370861 | 0.050934156 |
| fJdwUk9UHF4plyOjqc | KDM5C     | 8242   | 0.012378281 | 0.05095595  |
| E.7V0eiin0K0l3.1.o | NA        | NA     | 0.012400598 | 0.050994353 |
| W9VDXpAJUCNUq0oiFU | COPZ2     | 51226  | 0.012402869 | 0.050994353 |

|                    |         |        |             |             |
|--------------------|---------|--------|-------------|-------------|
| OaeFGh5BPih1l19j5w | KLHL38  | 340359 | 0.012402869 | 0.050994353 |
| 9TSiAp6t_oX7XVS_lw | NUDC    | 10726  | 0.012408517 | 0.050998475 |
| 316HcV13glJ6p_d4a0 | MZB1    | 51237  | 0.012409901 | 0.050998475 |
| KYQt4So2Im6c4QksJY | PQBP1   | 10084  | 0.012415827 | 0.051014074 |
| HVE9Hnh6fR6DK9K0Wo | EXOC2   | 55770  | 0.01242945  | 0.051061289 |
| ZVXI7VQPgjX1_Xun44 | POLR2A  | 5430   | 0.012449551 | 0.051135099 |
| iV1CckCSDaiS6JIDuQ | MRPL9   | 65005  | 0.012457747 | 0.051159991 |
| i4rYpTkC6JBCie7V4Y | BCAP29  | 55973  | 0.012471536 | 0.051186292 |
| uLvkKgXXJHuAtINI0k | RCAN2   | 10231  | 0.012489977 | 0.05123964  |
| 6nZOkIn2mVpVmlJyqY | DLK2    | 65989  | 0.01249413  | 0.051240945 |
| Nogju3mnfSq1ySjglM | THOC5   | 8563   | 0.012494573 | 0.051240945 |
| EkruqvCR8.iuqu9F3c | ATF6B   | 1388   | 0.012514177 | 0.051312555 |
| NAiF47.VwwJ4wSP_Sg | ANKS6   | 203286 | 0.012531067 | 0.051364226 |
| liEl6uEi4h3N0AiCfc | PTPLAD2 | 401494 | 0.012535441 | 0.051371386 |
| 9aiPUVSV6xC3HtNROE | TM9SF1  | 10548  | 0.012537103 | 0.051371386 |
| fEduksGaXejhNPnSdU | CIRH1A  | 84916  | 0.012551833 | 0.051417784 |
| TI3nrJO2S.U7v0o32o | DNAJA3  | 9093   | 0.012552719 | 0.051417784 |
| r3tnR2VZ.d7dF9NR3k | FOXP4   | 116113 | 0.012556208 | 0.051423282 |
| HtNxHt9Bli9Zbt9ZCk | DRD4    | 1815   | 0.012570772 | 0.05145409  |
| xoPmkYIOUlvxelJXp8 | ATG10   | 83734  | 0.012572323 | 0.05145409  |
| fCKeqM.Snv6e1exVLU | UNC119  | 9094   | 0.012579688 | 0.051457858 |
| IHTdBUQZfVLTSeXUVQ | MVB12B  | 89853  | 0.012584727 | 0.051469683 |
| QqQFQI6Aufvq6sJFF4 | TMCC3   | 57458  | 0.012589323 | 0.051477244 |
| 6JNfHdF.ziPiLofE.U | CLEC3A  | 10143  | 0.012603832 | 0.05149447  |
| xO1_IgFCz_JUnl6OX0 | GSTM2   | 2946   | 0.012605992 | 0.05149447  |
| QZReRRQYBTuQhRHcdU | LYPD2   | 137797 | 0.012607542 | 0.05149447  |
| EntfhCCHxFS61SKiH0 | KCNIP4  | 80333  | 0.012614908 | 0.051507594 |
| 00K3OeGXV631V5_6eA | DHPS    | 1725   | 0.01262111  | 0.051507594 |
| 9RnXt97_Sa3ui0l310 | NA      | NA     | 0.012647746 | 0.051595284 |
| xWJaLxokf0uKCQMbbU | BEND5   | 79656  | 0.012650626 | 0.051598244 |
| ZlkqCGNKHv.DaktmaM | UPF2    | 26019  | 0.012665356 | 0.051635563 |
| IKLk0G595LgnlWGLuw | AGAP8   | 728404 | 0.012666242 | 0.051635563 |
| rJ6o5IpaZ4mumkKXdU | NA      | NA     | 0.012668956 | 0.051637837 |
| EOempOpeRxPI9KCucQ | DNAJC4  | 3338   | 0.012676376 | 0.051659292 |
| HXeXV.lSl.dlez1Neo | SPRYD4  | 283377 | 0.012703899 | 0.051751133 |
| ohlepX1CtCU7t44T14 | STK40   | 83931  | 0.012711374 | 0.051757892 |
| 053U16NsKKTTSnu9eg | NA      | NA     | 0.012713977 | 0.051759224 |
| NqCa8Hzf5QT_KiX6lk | ADCK4   | 79934  | 0.012722505 | 0.051759224 |
| llrpJ1N9T16.ypINTo | CSNK1E  | 1454   | 0.012732584 | 0.051773847 |
| 6Oass8IFVdTe9UkWIA | GAA     | 2548   | 0.012750471 | 0.05183778  |
| HRdqhD1_p914rDj8VU | RABL2B  | 11158  | 0.012753129 | 0.051839788 |
| ioTIK86fyJF4I.74To | GTPBP8  | 29083  | 0.012785248 | 0.051952715 |
| 63j59e_JEC4ieUeJU  | PDIA4   | 9601   | 0.01280175  | 0.052002129 |

|                     |           |        |             |             |
|---------------------|-----------|--------|-------------|-------------|
| 3.0uJuuHkivLnuAJ6k  | CNTNAP2   | 26047  | 0.012826891 | 0.052095422 |
| uhIp9KxB6USly16CEY  | EXOSC10   | 5394   | 0.012845664 | 0.052153981 |
| Q57qrl9dJd6V36dI9A  | KRBA1     | 84626  | 0.012853749 | 0.05217519  |
| ESR4lecZUIgoropJQg  | C6orf136  | 221545 | 0.012855244 | 0.05217519  |
| 6fr4ZX0kR8ecd7FVJU  | LY6G5C    | 80741  | 0.012868812 | 0.052203721 |
| QToPpb6nxdefbhfXXk  | COX8A     | 1351   | 0.012914387 | 0.052333977 |
| xdQK6yQiixUvKr6JVQ  | PIP4K2C   | 79837  | 0.012914941 | 0.052333977 |
| BJ5VYXFJ12nFNqITwM  | NA        | NA     | 0.012950382 | 0.052430543 |
| WZ54UiVYC3XkngJfgk  | FGF21     | 26291  | 0.012950991 | 0.052430543 |
| o5ZFp99mRnr95_iRk0  | TNFRSF6B  | 8771   | 0.012959962 | 0.052457996 |
| Nien0qguc9EoUzUUUV0 | YPEL1     | 29799  | 0.012967771 | 0.052472988 |
| BpAUPnlTel7uVN.96I  | PRSS33    | 260429 | 0.012968047 | 0.052472988 |
| Teee5.43efFvQim7ko  | NCOR2     | 9612   | 0.012987596 | 0.052534338 |
| HhIZKavz.oqsfuk.14  | ADPRHL2   | 54936  | 0.012998892 | 0.052571157 |
| 0KI6VQQkVZ.5Jloni8  | ACTN4     | 81     | 0.013016447 | 0.052633266 |
| uULVn3rH_zdLwll4IA  | NA        | NA     | 0.013025197 | 0.052648323 |
| rlO55uXug3ouKrAJ40  | STAT5A    | 6776   | 0.013028962 | 0.052648323 |
| B0IK3X1ev1LREiVJJ8  | DBNDD1    | 79007  | 0.013037546 | 0.052668372 |
| fitei3tuHdl56P0Ajo  | NA        | NA     | 0.013038321 | 0.052668372 |
| 9cWoNnkim8dQieKQno  | EXOSC5    | 56915  | 0.013067062 | 0.052766673 |
| oBUB6pRd7FdH0qReJQ  | CRLF1     | 9244   | 0.013080352 | 0.05280254  |
| E3mu0qYgVN9QVac.og  | ITLN2     | 142683 | 0.013096024 | 0.052856896 |
| 359TSD1KtEIUEgkkuU  | PITPNA    | 5306   | 0.013128309 | 0.052933687 |
| 3Ql1_IUswu_oHd5SfU  | ARPC4     | 10093  | 0.013139273 | 0.052965649 |
| lUqoq5I4qJhUjyuKEs  | IL25      | 64806  | 0.013140658 | 0.052965649 |
| cq6SRE2tRXn7UgHvCI  | UBE2D2    | 7322   | 0.013160372 | 0.053027265 |
| KQpKCINTUXd6EsOuSQ  | PTPRZ1    | 5803   | 0.013168402 | 0.053041775 |
| 3VdSVEKHUI56euIno4  | AGFG2     | 3268   | 0.013173275 | 0.053048917 |
| WB9gp8OO0U.cXlGzaY  | PMS2P5    | 5383   | 0.013184904 | 0.053081468 |
| IA.flaoekdSCEm5aBY  | RUFY1     | 80230  | 0.013197309 | 0.05312248  |
| BeuXt358UO3CtVHI54  | KIR2DL4   | 3805   | 0.013224554 | 0.053214266 |
| Kg0Vq94XdR9yd0eE3o  | AMER1     | 139285 | 0.013254126 | 0.053324301 |
| HJZJxKKOdmKfVInWVo  | YDJC      | 150223 | 0.013262432 | 0.05334876  |
| i9eK7X6IFVC76IN5Qg  | BCR       | 613    | 0.013275114 | 0.05338446  |
| H6R4UoCHI3hXfJISJU  | FOXRED1   | 55572  | 0.01328929  | 0.05341195  |
| NhThUagnrTXvdMTp6k  | TMEM164   | 84187  | 0.013319415 | 0.05348949  |
| fpXd8RSVe3Sj7d9GVM  | LINC00174 | 285908 | 0.013319747 | 0.05348949  |
| KiZIPTTSEIRHriA46A  | ZNF573    | 126231 | 0.013322516 | 0.053491642 |
| xxALd3o6fflyrh4SKg  | NA        | NA     | 0.013349208 | 0.053577788 |
| fW46g4S4grWXuZugR4  | HERC2     | 8924   | 0.013350925 | 0.053577788 |
| WO_UG596pV7R5Z6OWY  | PRKX      | 5613   | 0.01336632  | 0.053616264 |
| l6qEigXqi1Nk7XEN50  | KDM2A     | 22992  | 0.013377893 | 0.053648053 |
| KXggCqSHXRPUkf1ReE  | BSCL2     | 26580  | 0.013379389 | 0.053648053 |

|                    |           |        |             |             |
|--------------------|-----------|--------|-------------|-------------|
| 6fXl8LhCyQTp_rVe5I | PEG3      | 5178   | 0.013427511 | 0.053786992 |
| o4qnELdACAn0s7IlyI | NA        | NA     | 0.013433381 | 0.053801509 |
| iJN1wOYJauFeh96RN4 | PLD6      | 201164 | 0.013440857 | 0.053822452 |
| 0qzqs5FzLVJx0CHgml | LOC729609 | 729609 | 0.013447336 | 0.053839396 |
| u30hunSgOliLCuDRck | NA        | NA     | 0.013454923 | 0.05385177  |
| cHu1RDSAXW_6SKpfRY | TNPO3     | 23534  | 0.013476299 | 0.053894761 |
| cJ79Kl75Sc5f4gXajU | MTAP      | 4507   | 0.013479289 | 0.053894761 |
| feqlx_OmYO1v93V9UU | URM1      | 81605  | 0.01348023  | 0.053894761 |
| 3SE1cen2eunTdgTUZQ | SLC27A1   | 376497 | 0.013483664 | 0.053894761 |
| 3J6IUSTR6H5SEELpkg | C1orf158  | 93190  | 0.013526969 | 0.054012733 |
| uo5XRPrn910105Vf5Q | NLRX1     | 79671  | 0.013539816 | 0.054039216 |
| NV5Jcat7.e7uVP1_Ek | ZCCHC12   | 170261 | 0.013540758 | 0.054039216 |
| KlLmJ.niPp1.n36A1E | ANAPC1    | 64682  | 0.013542363 | 0.054039216 |
| KUrgQnSQ2hN3qgKCuk | GGA3      | 23163  | 0.013550781 | 0.054063798 |
| 64THf.Nzsy.eoE70Tw | NA        | NA     | 0.013568557 | 0.054125705 |
| ISEQp0jgiuD4Eb14XQ | NA        | NA     | 0.013578248 | 0.054155344 |
| r05VttdUhA4BRnmfWM | PEX14     | 5195   | 0.013605881 | 0.054247492 |
| HnR4s8l_OSFR6.df_U | NA        | NA     | 0.01361452  | 0.054263871 |
| xS4p6KeiuiOq0oE3pl | TNIP2     | 79155  | 0.013639993 | 0.054350847 |
| 6UCpLqnprrvp.heig8 | MAPK7     | 5598   | 0.013640879 | 0.054350847 |
| 6menB6SBRk1ca Dcs  | EIF2B4    | 8890   | 0.013654447 | 0.054386812 |
| BoSE1ySWXVJXlygWxM | TLE2      | 7089   | 0.013693709 | 0.054506944 |
| HjjXHnVJBdxNSg4tXI | MAP4K1    | 11184  | 0.013700631 | 0.054520323 |
| WQrATJFCqepCOnVL3k | PARP2     | 10038  | 0.013703899 | 0.054520323 |
| QnpVIIAE5EjrL.Hrvk | HAUS5     | 23354  | 0.013713811 | 0.054541643 |
| 6EUkJBwoj0o5J6hCSo | LINS      | 55180  | 0.013719349 | 0.054554609 |
| 9QpdFeJHqfef3nelRM | THOC5     | 8563   | 0.013758445 | 0.054682842 |
| l0fgMN7KeLnzqrqogo | WIPF2     | 147179 | 0.013845387 | 0.054954693 |
| KUiuiggaygp46QCae4 | OSBPL2    | 9885   | 0.013847491 | 0.054954693 |
| 6pirXmZVSWs1aiXlSc | NA        | NA     | 0.013861059 | 0.054988898 |
| WnW3ISQL_FA2JL0GFE | ZBTB20    | 26137  | 0.013862997 | 0.054988898 |
| 60dCSemkioKp4MBI6I | DPP7      | 29952  | 0.013871027 | 0.055011639 |
| K5ITzNT1LXeR7EeSS4 | RBBP5     | 5929   | 0.013886809 | 0.055030659 |
| Kf_fSnCJ5dnf7VVPKM | SH3KBP1   | 30011  | 0.013887197 | 0.055030659 |
| xaopZJF96CH6X1neGQ | H2AFX     | 3014   | 0.013887861 | 0.055030659 |
| HejY4j7SQnUpJQqpXs | NA        | NA     | 0.013891239 | 0.055030659 |
| EfUIXTTMenh.UXrWuE | YIF1A     | 10897  | 0.013891904 | 0.055030659 |
| xSruebiiVVpF93tPig | ANAPC2    | 29882  | 0.01393316  | 0.055151996 |
| Wp6WTUjnXm947blThI | PPIE      | 10450  | 0.013934046 | 0.055151996 |
| 6ZRRJSJFiuSnTWkdRQ | NA        | NA     | 0.013950604 | 0.055181061 |
| NpJyogKQTReQKg9TSE | NA        | NA     | 0.013966608 | 0.055224536 |
| EfUP4gVOzq_S4liNuU | STRIP2    | 57464  | 0.013978458 | 0.055236514 |
| 6_VXlOCZedxS4le4w  | SPSB2     | 84727  | 0.013984107 | 0.055244842 |

|                     |           |        |             |             |
|---------------------|-----------|--------|-------------|-------------|
| KLh7rtfiOdE8eVpeXU  | VAR52     | 57176  | 0.0139861   | 0.055244842 |
| cQihlp64orAkpUuA6E  | SPAG8     | 26206  | 0.014012792 | 0.055335672 |
| Npf6oHqOfP13I9fp5U  | SNORA67   | 26781  | 0.014016336 | 0.055340545 |
| ohdH5B9Uk9VKDYQogY  | NF1       | 4763   | 0.014024754 | 0.055355531 |
| 6Op4nkUhXREUSR5CeM  | SPRN      | 503542 | 0.014031288 | 0.055372198 |
| EAPPKeSKQijVeJUgvQ  | ATG12     | 9140   | 0.014070329 | 0.055479295 |
| odS1C3ZxP1IE1d3noY  | CDH23     | 64072  | 0.014071769 | 0.055479295 |
| lYsnmdV5yBdQEJ3QRU  | RN7SK     | 125050 | 0.014082789 | 0.055511421 |
| TEHjkUp74oXllqboV4  | VILL      | 50853  | 0.01411452  | 0.055609046 |
| roC6BSA65Qp7p71f24  | STK19     | 8859   | 0.014131188 | 0.05565641  |
| NuJdA1MglQGIF_rlSg  | SART1     | 9092   | 0.014147857 | 0.055698729 |
| WnuARABMf8a8RPX8QE  | FOXD4L4   | 349334 | 0.014148909 | 0.055698729 |
| Wqels6oAg0lheHlIB0  | PARS2     | 25973  | 0.014185624 | 0.055797414 |
| oqKeSejSKADUu4SLkl  | SMUG1     | 23583  | 0.01418867  | 0.055799985 |
| cdqzliSEnoolapKhFw  | NSUN5P2   | 260294 | 0.014191937 | 0.055799985 |
| xR1JeoDluJCHS5VcVE  | TNIP3     | 79931  | 0.014193266 | 0.055799985 |
| QO1_oo2QJLeuJ6llGQ  | CEP68     | 23177  | 0.014212371 | 0.055865927 |
| fSga6TpuqgH6L6CunA  | STAG3L2   | 442582 | 0.014237623 | 0.055931087 |
| cyYSYSaIYqY4MYYT7o  | NFKBIB    | 4793   | 0.014238288 | 0.055931087 |
| fdW3HT1Wqb9.lj.4O4  | ADRBK1    | 156    | 0.014256119 | 0.055964423 |
| ZVQlRQfo9l_YTkoSll  | GRIPAP1   | 56850  | 0.014275944 | 0.05601471  |
| 0klqEolSCIR4oQlNEU  | C7orf49   | 78996  | 0.01429001  | 0.056051537 |
| f7nt14XkUHI7H5VXkU  | PTPN6     | 5777   | 0.014304242 | 0.056091753 |
| oUXfEu.oSirOued7sk  | TSC1      | 7248   | 0.014307288 | 0.056091753 |
| xOtJP3fkUSaJEnlQns  | NA        | NA     | 0.014322184 | 0.056140966 |
| rlSFe7XE9UrnEQL.SE  | UGT1A6    | 54578  | 0.014328663 | 0.056147988 |
| oleu16v9uON.ne.Uuo  | ATP6V0A1  | 535    | 0.014334146 | 0.056160283 |
| EFII20d6F6tINX6rcs  | NLRP2     | 55655  | 0.014343726 | 0.056186815 |
| fjp.553vdXcT93kgdk  | ZNF135    | 7694   | 0.014350371 | 0.05619628  |
| WZCNZOciagZYiCilgg  | CLASRP    | 11129  | 0.014358788 | 0.056208615 |
| lt5yU7ny3RdVJUJZ6Tw | PLD6      | 201164 | 0.014360173 | 0.056208615 |
| uvmrgwCT2km22fR7p0  | PDE4B     | 5142   | 0.01436056  | 0.056208615 |
| Trl4VHlclUZzkUB_90  | ORAI3     | 93129  | 0.014377506 | 0.056256556 |
| TSIA5T_P_BfsrVR0V0  | NA        | NA     | 0.014387529 | 0.056284322 |
| 6WU7ggrb59V9F9RRTg  | FBXO44    | 93611  | 0.01440597  | 0.056340321 |
| T8z7Agmpq5V55X7V_o  | KDM4B     | 23030  | 0.014459132 | 0.056530856 |
| ojHwH4oikilreoHkUk  | TRMT2A    | 27037  | 0.014473474 | 0.056568682 |
| Z6J5e3k7Nd6Zg53e_k  | LUZP1     | 7798   | 0.014473807 | 0.056568682 |
| NuEU.VOBFXqK05dj3k  | NA        | NA     | 0.014500443 | 0.056635824 |
| o66c6Kc6A6cceVN_c4  | KRTAP20-1 | 337975 | 0.014508694 | 0.056654983 |
| uiu.k7pTxbT6XuCT6E  | MYCBP2    | 23077  | 0.014520323 | 0.056685744 |
| 3q3rFfkoX_yvuoALZI  | SYTL2     | 54843  | 0.014539595 | 0.056742482 |
| OY3ueLvp1Fpd9N9dx0  | TM9SF1    | 10548  | 0.014546461 | 0.056760033 |



|                    |           |        |             |             |
|--------------------|-----------|--------|-------------|-------------|
| it0.63v_tV1dup_52o | LASP1     | 3927   | 0.014550227 | 0.05676548  |
| r0GXooZfOiUkzVLcCA | TLE3      | 7090   | 0.014574427 | 0.056832124 |
| TJjVu7OeuSvcJAuJ5U | LRRC37A4P | 55073  | 0.014608927 | 0.056929585 |
| T9XUjjuZBS6556G.gA | LINC00638 | 196872 | 0.014612305 | 0.056933486 |
| fnrq5XdyHrNJJe7BV8 | PDE8B     | 8622   | 0.014622383 | 0.05696349  |
