# Supplementary material for: The Role of Vitamin D in the Transcriptional Program of Human Pregnancy
Source: PubMed Central journal article supplement (PMC5053446; doi:10.1371/journal.pone.0163832), 2016-10-06
Supplement: pone.0163832.s002.pdf [file pone.0163832.s002.pdf]

**S2 Table**

| <b>GO Biological Process (Salmon Module)</b>               | <b>FDR</b> |
|------------------------------------------------------------|------------|
| response to bacterium                                      | 1.54E-07   |
| disruption of cells of other organism                      | 1.54E-07   |
| defense response to bacterium                              | 1.98E-07   |
| killing of cells of other organism                         | 1.98E-07   |
| response to other organism                                 | 6.39E-06   |
| response to biotic stimulus                                | 7.61E-06   |
| defense response to fungus                                 | 7.61E-06   |
| modification of morphology or physiology of other organism | 1.93E-05   |
| cell killing                                               | 2.52E-05   |
| defense response                                           | 4.00E-05   |
