# Supplementary material for: The Role of Vitamin D in the Transcriptional Program of Human Pregnancy
Source: PubMed Central journal article supplement (PMC5053446; doi:10.1371/journal.pone.0163832), 2016-10-06
Supplement: pone.0163832.s003.pdf [file pone.0163832.s003.pdf]

**S3 Table**

| <b>GO Biological Process (Green Module)</b>          | <b>P-value</b> |
|------------------------------------------------------|----------------|
| glutathione biosynthetic process                     | 0.001          |
| response to nitrosative stress                       | 0.0016         |
| hemoglobin metabolic process                         | 0.0004         |
| interaction with host                                | 0.0005         |
| glutathione metabolic process                        | 0.0018         |
| symbiosis, encompassing mutualism through parasitism | 0.001          |
| virus-host interaction                               | 0.0006         |
| interspecies interaction between organisms           | 0.0018         |
| nonribosomal peptide biosynthetic process            | 0.0012         |
| G1 phase                                             | 0.0017         |
