# Supplementary material for: The Role of Vitamin D in the Transcriptional Program of Human Pregnancy
Source: PubMed Central journal article supplement (PMC5053446; doi:10.1371/journal.pone.0163832), 2016-10-06
Supplement: pone.0163832.s004.pdf [file pone.0163832.s004.pdf]

**S4 Table:** Transcription factor networks targeting genes within the green module

| Network           | GO processes                                                                                                                                                                                                                                                             | Total nodes | Seed nodes | p-Value    |
|-------------------|--------------------------------------------------------------------------------------------------------------------------------------------------------------------------------------------------------------------------------------------------------------------------|-------------|------------|------------|
| CREB1             | G1/S transition of mitotic cell cycle , metallo-and- iron-sulfur cluster assembly,                                                                                                                                                                                       | 73          | 73         | 3.980E-193 |
| c-Myc             | modulation by virus of host morphology or physiology or of other organism involved in symbiotic interaction                                                                                                                                                              | 49          | 48         | 8.490E-124 |
| p53               | cell cycle process cellular response to glucose starvation , negative regulation of cell cycle                                                                                                                                                                           | 20          | 19         | 4.240E-48  |
| ZNF143            | single-organism carbohydrate metabolic process, carbohydrate metabolic process , nucleotide metabolic process), nucleoside phosphate metabolic process , CMP-N-acetylneuraminate biosynthetic process                                                                    | 19          | 18         | 1.550E-45  |
| GCR-alpha         | cellular component organization, cellular component organization or biogenesis , cellular amino acid biosynthetic process, rhythmic process , response to arsenic-containing substance                                                                                   | 19          | 18         | 1.550E-45  |
| Androgen receptor | androgen receptor signaling pathway, intracellular steroid hormone receptor signaling pathway , positive regulation of transcription, DNA-dependent , positive regulation of RNA metabolic process , positive regulation of gene expression                              | 16          | 15         | 7.080E-38  |
| SP1               | response to arsenic-containing substance, cellular response to chemical stimulus, cellular nitrogen compound metabolic process, modulation by virus of host morphology or physiology, regulation of transcription from RNA polymerase II promoter in response to hypoxia | 15          | 14         | 2.490E-35  |
| ESR1 (nuclear)    | intracellular receptor signaling pathway , RNA metabolic process , intracellular steroid hormone receptor signaling pathway, gene expression , transcription from RNA polymerase II promoter                                                                             | 15          | 14         | 2.490E-35  |
| E2F1              | cell cycle process, mitotic cell cycle , negative regulation of cellular process , cell cycle , negative regulation of biological process                                                                                                                                | 14          | 13         | 8.650E-33  |
| Oct-3/4           | transferrin transport (15.4%; 4.387e-04), ferric iron transport (15.4%; 4.954e-04), trivalent inorganic cation transport (15.4%; 4.954e-04), CMP-N-acetylneuraminate biosynthetic process (7.7%; 6.546e-04), ectodermal cell fate commitment (7.7%; 6.546e-04)           | 13          | 12         | 2.980E-30  |

S4 Table: part II

| Network                  | GO processes                                                                                                                                                                                                                                                                                                                                                                                                                                    | Total nodes | Seed nodes | p-Value   |
|--------------------------|-------------------------------------------------------------------------------------------------------------------------------------------------------------------------------------------------------------------------------------------------------------------------------------------------------------------------------------------------------------------------------------------------------------------------------------------------|-------------|------------|-----------|
| HIF1A                    | regulation of transcription from RNA polymerase II promoter in response to oxidative stress (18.2%; 1.836e-05), positive regulation of myeloid cell differentiation (27.3%; 3.690e-05), positive regulation of glycolysis (18.2%; 3.777e-05), positive regulation of hormone biosynthetic process (18.2%; 5.272e-05), response to hypoxia (36.4%; 5.680e-05)                                                                                    | 13          | 12         | 2.980E-30 |
| c-Jun                    | response to abiotic stimulus (58.3%; 6.643e-06), cellular nitrogen compound metabolic process (91.7%; 9.647e-06), response to nitrosative stress (16.7%; 1.202e-05), apoptotic mitochondrial changes (25.0%; 1.619e-05), cysteine metabolic process (16.7%; 1.836e-05)                                                                                                                                                                          | 12          | 11         | 1.010E-27 |
| YY1                      | negative regulation of cellular metabolic process (54.5%; 2.328e-04), negative regulation of metabolic process (54.5%; 4.027e-04), regulation of primary metabolic process (81.8%; 5.008e-04), regulation of cellular metabolic process (81.8%; 5.225e-04), regulation of nucleobase-containing compound metabolic process (72.7%; 6.864e-04)                                                                                                   | 12          | 11         | 1.010E-27 |
| EGR1                     | rhythmic process (36.4%; 3.034e-05), response to hyperoxia (18.2%; 2.849e-04), response to increased oxygen levels (18.2%; 2.849e-04), determination of ventral identity (9.1%; 5.539e-04), menopause (9.1%; 5.539e-04)                                                                                                                                                                                                                         | 11          | 10         | 3.400E-25 |
| MYOD                     | positive regulation of transcription from RNA polymerase II promoter (45.5%; 1.370e-04), modulation by virus of host morphology or physiology (36.4%; 1.436e-04), regulation of transcription from RNA polymerase II promoter (54.5%; 1.506e-04), modification by symbiont of host morphology or physiology (36.4%; 1.577e-04), modification of morphology or physiology of other organism involved in symbiotic interaction (36.4%; 2.018e-04) | 11          | 10         | 3.400E-25 |
| RelA (p65 NF-kB subunit) | TRIF-dependent toll-like receptor signaling pathway (30.0%; 1.630e-05), toll-like receptor 3 signaling pathway (30.0%; 1.776e-05), MyD88-independent toll-like receptor signaling pathway (30.0%; 1.826e-05), cellular nitrogen compound biosynthetic process (80.0%; 1.890e-05), toll-like receptor 4 signaling pathway (30.0%; 3.255e-05)                                                                                                     | 11          | 10         | 3.400E-25 |
| SP3                      | organonitrogen compound biosynthetic process (40.0%; 2.668e-04), sulfur amino acid metabolic process (20.0%; 2.986e-04), cellular modified amino acid biosynthetic process (20.0%; 5.108e-04), deoxycytidine metabolic process (10.0%; 1.007e-03), S-adenosylmethionine biosynthetic process (10.0%; 1.510e-03)                                                                                                                                 | 10          | 9          | 1.130E-22 |

**S4 Table:** part III

| Network    | GO processes                                                                                                                                                                                                                                                                                                                                                                                                                                                                                                                                                                                | Total nodes | Seed nodes | p-Value   |
|------------|---------------------------------------------------------------------------------------------------------------------------------------------------------------------------------------------------------------------------------------------------------------------------------------------------------------------------------------------------------------------------------------------------------------------------------------------------------------------------------------------------------------------------------------------------------------------------------------------|-------------|------------|-----------|
| IRF4       | methylation (30.0%; 3.640e-04), T-helper 17 cell lineage commitment (10.0%; 1.007e-03), positive regulation of interleukin-13 biosynthetic process (10.0%; 1.007e-03), regulation of interleukin-13 biosynthetic process (10.0%; 1.007e-03), positive regulation of transforming growth factor beta3 production (10.0%; 1.007e-03)                                                                                                                                                                                                                                                          | 10          | 9          | 1.130E-22 |
| GATA-3     | negative regulation of fibroblast growth factor receptor signaling pathway involved in ureteric bud formation (10.0%; 5.036e-04), negative regulation of cell proliferation involved in mesonephros development (10.0%; 5.036e-04), regulation of fibroblast growth factor receptor signaling pathway involved in ureteric bud formation (10.0%; 5.036e-04), regulation of cell proliferation involved in mesonephros development (10.0%; 5.036e-04), regulation of glial cell-derived neurotrophic factor receptor signaling pathway involved in ureteric bud formation (10.0%; 5.036e-04) | 10          | 9          | 1.130E-22 |
| FOXO3A     | negative regulation of cellular process (80.0%; 7.775e-05), negative regulation of cellular metabolic process (60.0%; 1.152e-04), negative regulation of macromolecule metabolic process (60.0%; 1.314e-04), negative regulation of biological process (80.0%; 1.558e-04), negative regulation of metabolic process (60.0%; 2.011e-04)                                                                                                                                                                                                                                                      | 10          | 9          | 1.130E-22 |
| C/EBP zeta | cell redox homeostasis (22.2%; 3.858e-04), response to endogenous stimulus (55.6%; 8.593e-04), positive regulation of transforming growth factor beta3 production (11.1%; 9.063e-04), TRIF-dependent toll-like receptor signaling pathway (22.2%; 9.548e-04), toll-like receptor 3 signaling pathway (22.2%; 1.010e-03)                                                                                                                                                                                                                                                                     | 9           | 8          | 3.670E-20 |
